# Supplementary material for: Integrative Epigenomic Analysis Identifies Biomarkers and Therapeutic Targets in Adult B-Acute Lymphoblastic Leukemia
Source: Oxford University Press journal article supplement (doi:10.1158/2159-8290.cd-12-0208), 2012-10-30
Supplement: 21598290cd120208-sup-t4_xls_330k.xls [file 21598290cd120208-sup-t4_xls_330k.xls]

## Sheet: 1740 FDR 0.01 dx 1.5
Table S4. Dunnett_ANOVA_genes
ID	HELP_probeset	Gene symbol	ANOVA	BCR/ABL_FDR	E2A/PBX1_FDR	MLLr_FDR	BCR/ABL_dx	E2A/PBX1_dx	MLLr_dx	BCR/ABL	E2A/PBX1	MLLr		1493 unique genes	symbol
1	MSPI0406S00000353	KLHL17	4.4461e-09	5.32113e-07	5.00712e-06	0.0222608	-1.63766	-2.28281	-0.90394	1	1	0			A1BG
1	MSPI0406S00000353	NOC2L	4.4461e-09	5.32113e-07	5.00712e-06	0.0222608	-1.63766	-2.28281	-0.90394	1	1	0			AAAS
2	MSPI0406S00000761	B3GALT6	2.21365e-14	0.0471214	1.70703e-12	0.000149751	0.542264	2.7969	1.0899	0	1	0			AANAT
2	MSPI0406S00000761	SDF4	2.21365e-14	0.0471214	1.70703e-12	0.000149751	0.542264	2.7969	1.0899	0	1	0			ABCA12
3	MSPI0406S00000762	B3GALT6	2.46104e-05	1	0.000441755	0.384621	0.123295	1.73318	0.468919	0	1	0			ABCB10
3	MSPI0406S00000762	SDF4	2.46104e-05	1	0.000441755	0.384621	0.123295	1.73318	0.468919	0	1	0			ABCB6
4	MSPI0406S00001703	GABRD	3.71002e-09	0.0190561	0.00155778	4.29779e-08	0.679072	1.39587	1.60451	0	0	1			ABCE1
5	MSPI0406S00002229	LOC100129534	2.28452e-05	0.218683	9.2341e-05	0.0233534	0.417727	1.62945	0.727948	0	1	0			ABR
6	MSPI0406S00002279	MORN1	3.09207e-09	0.0036573	0.00230845	8.84415e-09	0.716106	1.2099	1.50411	0	0	1			ACACB
6	MSPI0406S00002279	RER1	3.09207e-09	0.0036573	0.00230845	8.84415e-09	0.716106	1.2099	1.50411	0	0	1			ACAD8
7	MSPI0406S00002546		2.36446e-14	1	6.04764e-08	0.00517779	-0.083204	1.56815	0.609959	0	1	0			ACADVL
8	MSPI0406S00003076	FLJ42875	3.4349e-06	0.0551392	0.000341051	1	0.798118	2.15574	0.0253637	0	1	0			ACE
8	MSPI0406S00003076	PRDM16	3.4349e-06	0.0551392	0.000341051	1	0.798118	2.15574	0.0253637	0	1	0			ACLY
9	MSPI0406S00003962	TPRG1L	2.00105e-07	0.000180116	0.017566	6.29673e-08	1.1072	1.27549	1.81543	0	0	1			ACOXL
10	MSPI0406S00005846	KCNAB2	6.69722e-07	0.0383796	0.467341	1.77276e-06	0.68295	0.618369	1.56368	0	0	1			ACP5
11	MSPI0406S00006163	GPR153	2.68881e-27	1	0.250421	0	-0.146496	0.813413	2.79098	0	0	1			ACSBG1
12	MSPI0406S00008461	CA6	1.24905e-07	1.97659e-06	0.412561	0.154623	2.04025	0.97195	0.911971	1	0	0			ACSF2
13	MSPI0406S00011057	PTCHD2	0.000103995	0.000308142	0.000915752	0.0133973	1.30898	2.11747	1.11284	0	1	0			ACSL1
14	MSPI0406S00011273	MAD2L2	0.000162935	0.162232	0.000129296	0.388171	0.475358	1.65487	0.421363	0	1	0			ADAM30
15	MSPI0406S00011571	KIAA2013	1.18219e-08	7.61545e-08	0.781424	0.00140646	1.63941	0.463392	1.14582	1	0	0			ADAMTS15
16	MSPI0406S00011870	TNFRSF1B	1.14176e-10	3.66059e-10	4.30583e-07	2.04948e-10	1.19124	1.57196	1.38341	0	1	0			ADAMTS19
17	MSPI0406S00013650		8.48989e-11	7.26785e-07	4.01638e-08	3.62086e-10	1.13235	2.05224	1.63052	0	1	1			ADAMTSL2
18	MSPI0406S00014033	CASP9	2.0539e-10	4.78597e-08	0.000775476	0.155598	-2.6326	-2.76621	-0.994447	1	1	0			ADAMTSL3
18	MSPI0406S00014033	DNAJC16	2.0539e-10	4.78597e-08	0.000775476	0.155598	-2.6326	-2.76621	-0.994447	1	1	0			ADAP2
19	MSPI0406S00014167	PLEKHM2	3.39643e-17	0.166108	0.382596	1.04568e-05	-0.662007	0.857191	1.83704	0	0	1			ADCY3
20	MSPI0406S00014386	FLJ37453	2.00592e-07	0.00132003	7.99701e-05	7.03747e-07	0.937224	1.74029	1.52739	0	1	1			ADCY4
20	MSPI0406S00014386	SPEN	2.00592e-07	0.00132003	7.99701e-05	7.03747e-07	0.937224	1.74029	1.52739	0	1	1			ADCYAP1
21	MSPI0406S00014541	CLCNKA	8.30756e-10	0.282479	0.000789666	1.57489e-06	0.437291	1.66602	1.53412	0	1	1			ADIPOQ
21	MSPI0406S00014541	CLCNKB	8.30756e-10	0.282479	0.000789666	1.57489e-06	0.437291	1.66602	1.53412	0	1	1			ADM2
21	MSPI0406S00014541	HSPB7	8.30756e-10	0.282479	0.000789666	1.57489e-06	0.437291	1.66602	1.53412	0	1	1			ADPRHL1
22	MSPI0406S00014725	EPHA2	8.20072e-08	1.24932e-08	0.00184916	0.000296271	1.58961	1.51116	1.20285	1	1	0			ADPRHL2
23	MSPI0406S00014726	EPHA2	7.8606e-13	1.76243e-13	5.1806e-07	2.79427e-11	2.00564	2.09268	1.97172	1	1	1			ADRA1D
24	MSPI0406S00015124	MST1	1.89592e-21	0.00893047	9.95317e-05	1.32947e-14	0.632351	1.42999	2.2707	0	0	1			ADRA2C
25	MSPI0406S00015469	ATP13A2	3.04994e-19	0	1.00414e-12	0	2.36908	2.87286	2.67012	1	1	1			ADRBK1
26	MSPI0406S00016730	KLHDC7A	3.36024e-10	7.7165e-08	0.0285783	0.36587	1.66508	1.28149	0.515455	1	0	0			AEBP1
27	MSPI0406S00017075	ALDH4A1	1.48256e-19	0.0256983	0.588737	1.32947e-14	0.768355	0.581359	2.87683	0	0	1			AFF3
28	MSPI0406S00018374		5.83443e-12	0.00251549	5.34084e-06	2.92897e-10	0.648924	1.51689	1.46314	0	1	0			AGAP11
29	MSPI0406S00019401	HSPG2	5.28952e-12	0.00179671	5.72506e-08	3.19329e-09	1.16223	3.1098	2.37083	0	1	1			AGRP
30	MSPI0406S00019402	HSPG2	1.14019e-09	0.00267128	5.7935e-08	1.72905e-06	1.06076	2.96394	1.81719	0	1	1			AGXT2L2
31	MSPI0406S00020478	HNRNPR	1.75436e-18	5.90852e-07	0.862206	0.49315	2.08971	-0.58786	-0.608457	1	0	0			AHCYL1
32	MSPI0406S00021152	MYOM3	2.10928e-05	0.0147178	0.116116	1.06185e-05	0.799125	1.07582	1.51413	0	0	1			AHCYL2
33	MSPI0406S00021178	IL22RA1	3.44639e-06	4.17465e-06	0.00426576	2.27209e-06	1.57773	1.74038	1.84794	1	1	1			AHSA2
34	MSPI0406S00021384	C1orf201	6.60801e-12	0.000694094	0.000245035	3.01234e-11	0.733012	1.25553	1.58063	0	0	1			AIPL1
34	MSPI0406S00021384	NIPAL3	6.60801e-12	0.000694094	0.000245035	3.01234e-11	0.733012	1.25553	1.58063	0	0	1			AK1
35	MSPI0406S00022071	RHD	6.05693e-05	0.00329526	0.00127595	0.000439478	0.775426	1.54616	1.03227	0	1	0			AK5
36	MSPI0406S00022455	C1orf135	3.55895e-14	1.4771e-12	3.24288e-07	0	1.39675	1.63967	1.76608	0	1	1			AKAP8L
37	MSPI0406S00023222		1.39782e-14	2.53487e-07	7.80043e-11	1.70703e-12	0.781558	1.60692	1.27347	0	1	0			ALDH3A1
38	MSPI0406S00023435	FAM46B	0.00853366	0.0907632	0.00694582	0.26257	-0.68636	-1.58604	-0.61353	0	1	0			ALDH4A1
39	MSPI0406S00023719	SYTL1	5.20618e-11	0.000171894	0.000455485	4.53096e-11	0.941442	1.46463	1.84258	0	0	1			ALKBH4
40	MSPI0406S00026111	MATN1	1.9058e-10	0.105238	0.000847778	1.94464e-07	0.51926	1.49258	1.5857	0	0	1			ALS2CL
41	MSPI0406S00026282		0.00324819	0.00783253	0.00695203	0.0241056	1.03683	1.69205	1.0331	0	1	0			AMDHD2
42	MSPI0406S00026674	SERINC2	2.38578e-05	0.000228715	0.00410666	1.63534e-05	1.35579	1.82582	1.82011	0	1	1			AMIGO2
43	MSPI0406S00026971	BAI2	2.58437e-09	0.0556315	0.0489709	4.53072e-08	0.730377	1.23315	2.01254	0	0	1			AMIGO3
44	MSPI0406S00026972	BAI2	1.08739e-13	0.000980813	0.000287868	1.41921e-12	1.05422	1.98897	2.53315	0	1	1			ANAPC10
45	MSPI0406S00027019	SPOCD1	1.40929e-10	2.70969e-06	1	0.920779	1.50828	0.125085	0.27746	1	0	0			ANGPT4
46	MSPI0406S00027335	CCDC28B	1.0607e-09	0.000210396	2.57432e-09	2.4492e-05	0.998145	2.60598	1.27715	0	1	0			ANK3
47	MSPI0406S00027341	CCDC28B	0.000287702	0.0612224	0.00256354	1	-0.705512	-1.67524	-0.2112	0	1	0			ANKRD13A
47	MSPI0406S00027341	DCDC2B	0.000287702	0.0612224	0.00256354	1	-0.705512	-1.67524	-0.2112	0	1	0			ANKRD23
47	MSPI0406S00027341	IQCC	0.000287702	0.0612224	0.00256354	1	-0.705512	-1.67524	-0.2112	0	1	0			ANKRD26
48	MSPI0406S00027476	MARCKSL1	1.9251e-15	1	0.00106887	8.03264e-08	0.0693051	2.58096	2.76612	0	1	1			ANKRD27
49	MSPI0406S00027887	S100PBP	7.62571e-11	1	0.102433	4.37272e-05	0.0425578	-1.15334	-1.63091	0	0	1			ANKRD34B
49	MSPI0406S00027887	YARS	7.62571e-11	1	0.102433	4.37272e-05	0.0425578	-1.15334	-1.63091	0	0	1			ANKS6
50	MSPI0406S00028749	GJA4	7.73834e-07	0.356581	2.23327e-06	0.414171	0.56427	3.07522	0.622363	0	1	0			ANO3
51	MSPI0406S00029445	ADPRHL2	5.81019e-16	0.371463	5.88633e-13	0.000428794	0.277543	2.40212	0.81957	0	1	0			ANXA5
51	MSPI0406S00029445	TEKT2	5.81019e-16	0.371463	5.88633e-13	0.000428794	0.277543	2.40212	0.81957	0	1	0			AOC2
52	MSPI0406S00029446	ADPRHL2	1.40062e-14	0.553	1.90871e-11	0.000612164	0.259699	2.49536	0.919745	0	1	0			AOC3
52	MSPI0406S00029446	TEKT2	1.40062e-14	0.553	1.90871e-11	0.000612164	0.259699	2.49536	0.919745	0	1	0			APLP2
53	MSPI0406S00029652	C1orf113	2.60622e-10	0.0670991	6.30167e-05	1.98225e-07	0.63475	1.91221	1.74304	0	1	1			APP
54	MSPI0406S00031586		7.97572e-06	0.00139032	0.0035664	5.5406e-06	1.36982	2.08338	2.15167	0	1	1			APPL1
55	MSPI0406S00031589		1.89671e-28	1.3464e-07	4.63422e-11	0	0.595172	1.22015	1.55777	0	0	1			APPL2
56	MSPI0406S00031699	NT5C1A	2.42786e-13	7.13778e-12	4.3524e-07	3.40047e-14	1.5809	1.88628	2.0289	1	1	1			AQP1
57	MSPI0406S00032704	EDN2	1.00303e-13	1.35479e-13	0.000274474	2.899e-05	1.82833	1.41868	1.13951	1	0	0			ARAP3
58	MSPI0406S00033257	ZNF691	0.000646797	0.240271	0.0538295	0.00264576	-0.737725	-1.69119	-1.65444	0	0	1			ARD1B
59	MSPI0406S00033978	ARTN	2.58292e-07	0.000418834	0.000934642	1.54778e-07	1.38202	2.14832	2.24875	0	1	1			ARF1
60	MSPI0406S00035016	NASP	1.41059e-16	0	7.3695e-09	0	1.48486	1.6007	1.71059	0	1	1			ARF5
61	MSPI0406S00035450	NSUN4	3.12958e-07	0.804034	2.93869e-06	0.897673	0.307112	2.795	0.329501	0	1	0			ARF6
62	MSPI0406S00036791	CDKN2C	2.40152e-15	0	0.00128863	1.21355e-08	1.54651	0.974681	1.14716	1	0	0			ARHGAP10
63	MSPI0406S00037337	CC2D1B	1.20905e-06	1.62807e-05	0.000690129	0.147832	-1.35413	-1.8065	-0.674369	0	1	0			ARHGAP24
64	MSPI0406S00037338	CC2D1B	2.31068e-09	0.00299854	1.05131e-05	1.09746e-07	0.676612	1.56546	1.32888	0	1	0			ARHGAP30
65	MSPI0406S00037660		5.53048e-09	1.44988e-06	0.0235679	4.89873e-10	1.47276	1.2622	2.11527	0	0	1			ARHGEF6
66	MSPI0406S00038358	HSPB11	7.64805e-09	6.67766e-09	0.369037	1.07903e-06	2.04479	0.838454	1.95163	1	0	1			ARID3A
66	MSPI0406S00038358	LRRC42	7.64805e-09	6.67766e-09	0.369037	1.07903e-06	2.04479	0.838454	1.95163	1	0	1			ARID5A
67	MSPI0406S00038906		1.37839e-19	0.533228	1.66881e-06	6.74729e-12	0.458935	3.11049	3.09026	0	1	1			ARL4C
68	MSPI0406S00038907		5.97102e-22	0.435985	2.57058e-07	1.11571e-13	0.37505	2.38748	2.50455	0	1	1			ARMC4
69	MSPI0406S00038922	FAM151A	3.10736e-06	0.552818	0.000400176	0.00694774	0.298519	1.59429	0.863243	0	1	0			ARTN
70	MSPI0406S00038923	FAM151A	4.41241e-08	0.6224	3.56467e-06	0.00783215	0.233469	1.73781	0.737409	0	1	0			ASAP1
71	MSPI0406S00039649		3.93979e-14	0.395397	3.21386e-12	0.987993	0.303678	2.58883	0.16949	0	1	0			ASB10
72	MSPI0406S00040591		1.33283e-15	0	9.73417e-09	8.73908e-14	1.73352	1.79708	1.68517	1	1	1			ASCL2
73	MSPI0406S00043283	ST6GALNAC3	8.88774e-10	0.00048006	1.57538e-07	0.853641	1.69732	4.14795	0.449302	1	1	0			ASGR1
74	MSPI0406S00043474	AK5	9.87285e-13	1.85547e-13	1.62194e-06	1.28938e-10	1.74869	1.72955	1.62845	1	1	1			ASGR2
75	MSPI0406S00043793	ELTD1	1.50511e-07	7.66662e-05	1.20679e-06	7.40067e-06	1.30061	2.5982	1.63928	0	1	1			ATAD4
76	MSPI0406S00044425	GNG5	0.000814583	0.00412428	0.00150399	0.0165023	-0.88368	-1.55746	-0.871796	0	1	0			ATF5
76	MSPI0406S00044425	SPATA1	0.000814583	0.00412428	0.00150399	0.0165023	-0.88368	-1.55746	-0.871796	0	1	0			ATF6B
77	MSPI0406S00044464	SSX2IP	0.000681922	0.189609	0.00551337	0.00927067	0.871284	2.44653	1.62223	0	1	1			ATN1
78	MSPI0406S00044979	LOC339524	4.40395e-08	0.108003	0.564814	7.38988e-07	0.693641	0.682126	1.96518	0	0	1			ATP13A2
79	MSPI0406S00046043	BRDT	6.5661e-11	1.96194e-06	1	0.822873	1.80502	-0.0497345	0.378621	1	0	0			ATP1A2
80	MSPI0406S00046205	GFI1	3.74445e-10	0.393298	0.00523001	6.38735e-07	0.468451	1.71196	1.93099	0	1	1			ATP2A1
81	MSPI0406S00048917	CELSR2	0.00115858	0.179044	0.00572847	1	0.624303	1.73085	0.168237	0	1	0			ATP4A
82	MSPI0406S00049062	ATXN7L2	4.94024e-14	1.02657e-13	0.00164005	8.73908e-14	1.33713	0.926809	1.51652	0	0	1			ATP5D
83	MSPI0406S00049370	AHCYL1	4.66682e-14	3.72175e-09	0.000360554	2.42133e-14	1.36431	1.39441	2.15061	0	0	1			ATP6V0C
84	MSPI0406S00049510		8.08926e-06	0.0963766	0.128145	1.89422e-05	0.690523	1.08235	1.64687	0	0	1			ATP6V0D1
85	MSPI0406S00049511		6.93005e-09	0.00895195	0.00851977	2.74227e-08	1.2917	2.15486	2.87588	0	1	1			ATP6V0E2
86	MSPI0406S00049833	CEPT1	1.08685e-12	0.000269547	0.000128835	3.55342e-12	-0.952266	-1.66398	-2.0464	0	1	1			ATP8B3
86	MSPI0406S00049833	DRAM2	1.08685e-12	0.000269547	0.000128835	3.55342e-12	-0.952266	-1.66398	-2.0464	0	1	1			ATXN7L2
87	MSPI0406S00050881	OLFML3	8.70908e-07	0.00532613	1	1.37683e-06	1.02309	0.315085	1.8606	0	0	1			AUP1
88	MSPI0406S00051172	SYCP1	6.44241e-05	0.00015787	0.000561254	0.0180608	1.14682	1.74357	0.90054	0	1	0			B3GALT6
89	MSPI0406S00052387	ADAM30	2.01834e-07	8.30936e-05	0.00134808	7.15052e-08	1.63137	2.22601	2.50366	1	1	1			B3GNT1
90	MSPI0406S00053465	GJA5	6.62916e-09	1.17662e-06	2.86263e-06	8.8796e-09	1.34417	2.09735	1.8254	0	1	1			BAALC
91	MSPI0406S00054201	MTMR11	1.48256e-19	5.83818e-12	0.154498	7.51034e-12	2.07913	-0.899502	2.31041	1	0	1			BAHD1
92	MSPI0406S00054603	ECM1	1.18304e-11	8.25191e-05	1	1.27172e-10	1.38046	0.0886488	2.31675	0	0	1			BAI2
93	MSPI0406S00054963	FAM63A	1.42448e-13	8.78442e-10	1.72603e-06	1.32947e-14	1.1575	1.46508	1.72641	0	0	1			BAT5
93	MSPI0406S00054963	PRUNE	1.42448e-13	8.78442e-10	1.72603e-06	1.32947e-14	1.1575	1.46508	1.72641	0	0	1			BAZ2B
94	MSPI0406S00055314	SELENBP1	3.49185e-09	1.99057e-09	9.28266e-06	5.59648e-06	1.40004	1.80688	1.34942	0	1	0			BCL2L2
95	MSPI0406S00055537	C1orf230	0.000866041	0.016842	0.00392251	0.533737	0.961841	1.81484	0.501328	0	1	0			BCL3
95	MSPI0406S00055537	TNRC4	0.000866041	0.016842	0.00392251	0.533737	0.961841	1.81484	0.501328	0	1	0			BCL6
96	MSPI0406S00055596	LINGO4	8.80842e-13	2.41284e-11	0.00259077	0.0216371	2.4075	1.86761	1.0556	1	1	0			BCR
97	MSPI0406S00055793		1.152e-05	0.00012896	0.0010793	0.196862	1.08227	1.54435	0.559566	0	1	0			BCS1L
98	MSPI0406S00055835	LCE3E	8.21849e-19	0.259535	0.455705	2.13593e-13	0.395267	0.540523	2.1353	0	0	1			BGLAP
99	MSPI0406S00055841	LCE3A	1.44661e-06	0.278637	1	6.15053e-05	0.497573	0.313951	1.53676	0	0	1			BGN
100	MSPI0406S00055964	PGLYRP4	1.21751e-06	2.41581e-07	0.0156629	6.69936e-06	1.71448	1.45926	1.68864	1	0	1			BIN1
101	MSPI0406S00056071	S100A3	2.81141e-12	2.84506e-12	1.08325e-06	2.42221e-11	1.47643	1.64246	1.70677	0	1	1			BIN2
102	MSPI0406S00056091	S100A2	1.49455e-11	4.94456e-11	7.79658e-10	1.12426e-07	1.34714	2.02951	1.22275	0	1	0			BLK
103	MSPI0406S00056127	S100A14	4.54643e-15	1.15753e-07	4.37701e-13	4.98303e-12	1.04191	2.36732	1.54665	0	1	1			BLOC1S1
103	MSPI0406S00056127	S100A16	4.54643e-15	1.15753e-07	4.37701e-13	4.98303e-12	1.04191	2.36732	1.54665	0	1	1			BLVRB
104	MSPI0406S00056131	S100A1	4.65667e-08	9.79166e-05	0.000269612	0.766656	2.34281	3.55064	0.62264	1	1	0			BMP1
104	MSPI0406S00056131	S100A13	4.65667e-08	9.79166e-05	0.000269612	0.766656	2.34281	3.55064	0.62264	1	1	0			BOLL
105	MSPI0406S00056132	S100A1	5.63901e-11	5.36336e-09	5.38083e-09	0.0030689	2.09061	3.36393	1.31496	1	1	0			BRCA2
105	MSPI0406S00056132	S100A13	5.63901e-11	5.36336e-09	5.38083e-09	0.0030689	2.09061	3.36393	1.31496	1	1	0			BRD1
106	MSPI0406S00056135	S100A1	1.98572e-09	0.000165038	0.000209411	1.59965e-09	1.41413	2.29303	2.53965	0	1	1			BRDT
106	MSPI0406S00056135	S100A13	1.98572e-09	0.000165038	0.000209411	1.59965e-09	1.41413	2.29303	2.53965	0	1	1			BRE
107	MSPI0406S00056272	SLC27A3	7.86163e-21	0	1.48607e-07	0	2.61894	2.05731	2.39549	1	1	1			BRMS1
108	MSPI0406S00056802	IL6R	2.87895e-10	3.25138e-10	0.00178546	3.92465e-10	1.39589	1.18049	1.62743	0	0	1			BRPF1
109	MSPI0406S00057220	PYGO2	0.000140246	0.00238465	0.000213636	0.00782671	0.932499	1.81598	0.966865	0	1	0			BTBD1
110	MSPI0406S00057363	EFNA3	1.5448e-12	2.67914e-08	0.00104801	0.474333	1.81361	1.74609	0.459695	1	1	0			C10orf10
111	MSPI0406S00057660	C1orf104	6.03124e-12	0.0084303	0.000106152	3.07583e-10	0.734236	1.64572	1.84392	0	1	1			C10orf116
111	MSPI0406S00057660	RUSC1	6.03124e-12	0.0084303	0.000106152	3.07583e-10	0.734236	1.64572	1.84392	0	1	1			C10orf2
112	MSPI0406S00057661	C1orf104	4.33878e-13	4.13022e-06	4.22876e-06	1.01808e-12	0.96858	1.54647	1.75762	0	1	1			C10orf93
112	MSPI0406S00057661	RUSC1	4.33878e-13	4.13022e-06	4.22876e-06	1.01808e-12	0.96858	1.54647	1.75762	0	1	1			C11orf41
113	MSPI0406S00058122	KIAA0907	7.74927e-12	5.11146e-13	7.26033e-05	3.89465e-08	1.73967	1.58083	1.45297	1	1	0			C11orf74
114	MSPI0406S00058342	LMNA	3.52384e-06	0.00604997	3.83532e-05	0.000207427	0.848759	2.00931	1.23778	0	1	0			C11orf75
115	MSPI0406S00058472	BGLAP	1.54324e-05	0.0065712	9.30705e-05	0.000384451	1.71962	3.77168	2.49116	1	1	1			C11orf9
116	MSPI0406S00058711	MEF2D	9.48034e-15	3.08766e-13	4.91103e-07	1.32947e-14	1.31637	1.39874	1.64375	0	0	1			C12orf53
117	MSPI0406S00058712	MEF2D	5.27589e-13	1.55823e-11	6.74882e-06	9.48353e-14	1.41098	1.47268	1.79052	0	0	1			C13orf18
118	MSPI0406S00058810	HAPLN2	5.45505e-07	7.86096e-07	0.0003212	0.00753782	1.33984	1.65453	0.898537	0	1	0			C13orf29
119	MSPI0406S00058914	C1orf66	2.41946e-13	4.40784e-13	0.000163572	2.20153e-13	1.33696	1.09865	1.51262	0	0	1			C14orf79
119	MSPI0406S00058914	ISG20L2	2.41946e-13	4.40784e-13	0.000163572	2.20153e-13	1.33696	1.09865	1.51262	0	0	1			C16orf42
120	MSPI0406S00059730	FCRL6	2.07907e-08	0.00971566	0.00970619	5.71327e-08	0.740985	1.21338	1.61411	0	0	1			C16orf55
121	MSPI0406S00059742	SLAMF8	0.000181413	0.000106973	0.00596915	0.00283094	1.52061	1.89537	1.4045	1	1	0			C17orf49
122	MSPI0406S00059782	CCDC19	8.88138e-12	0.000796512	3.17301e-05	8.19444e-11	0.925181	1.78128	1.96972	0	1	1			C17orf59
123	MSPI0406S00059902	ATP1A2	0.00017854	0.108085	0.000136705	0.0606901	0.624025	1.9682	0.801238	0	1	0			C17orf64
124	MSPI0406S00060099	SLAMF1	1.80682e-11	0.0140885	0.0242301	1.30453e-05	-0.962332	1.49428	-1.79172	0	0	1			C18orf1
125	MSPI0406S00060281	ARHGAP30	9.63974e-09	4.1324e-06	7.69457e-05	3.6749e-09	1.82145	2.64417	2.59673	1	1	1			C19orf26
126	MSPI0406S00060589	FCGR2A	8.25586e-10	0.967998	0.976242	3.6565e-06	0.218965	0.417346	1.86767	0	0	1			C19orf51
127	MSPI0406S00068300	C1orf106	1.98544e-14	2.87827e-13	1.09533e-06	0	1.77362	1.93536	2.14849	1	1	1			C19orf56
128	MSPI0406S00068710	LAD1	3.15805e-08	2.60919e-06	1.84942e-05	2.32112e-08	1.51576	2.23429	2.0017	1	1	1			C19orf59
129	MSPI0406S00069855	MYBPH	4.60367e-23	1	4.37701e-13	1.75118e-08	0.0607281	3.20006	1.6783	0	1	1			C19orf60
130	MSPI0406S00069948	FMOD	7.5415e-14	0.00310091	2.89429e-09	1.25622e-09	0.788972	2.43187	1.77919	0	1	1			C1orf104
131	MSPI0406S00070431	ETNK2	3.18471e-12	2.42631e-07	1.73257e-11	1.00411e-07	1.543	3.43086	1.92429	1	1	1			C1orf106
132	MSPI0406S00070486		8.19202e-05	0.866076	0.00045559	0.27236	0.292246	2.26871	0.707089	0	1	0			C1orf113
133	MSPI0406S00070487		1.86661e-07	0.0436096	2.67165e-05	3.4255e-05	0.628515	1.84604	1.28002	0	1	0			C1orf135
134	MSPI0406S00070618	PPP1R15B	2.42116e-09	2.98145e-06	0.198492	9.58376e-10	1.77986	1.09389	2.67365	1	0	1			C1orf201
135	MSPI0406S00070680		3.21695e-07	0.00859833	0.601315	6.87581e-07	0.869199	0.574783	1.74818	0	0	1			C1orf229
136	MSPI0406S00070681		4.45377e-05	0.00155452	0.875004	3.63542e-05	1.09982	0.45712	1.57262	0	0	1			C1orf230
137	MSPI0406S00071263	NUAK2	0.000132482	0.0155427	0.00145156	0.000646209	0.77503	1.5752	1.17081	0	1	0			C1orf66
138	MSPI0406S00072032	PIGR	9.49441e-06	0.105384	0.000369788	0.000900488	0.642961	1.92872	1.28826	0	1	0			C1orf97
139	MSPI0406S00072033	PIGR	0.000293425	0.14974	0.000574388	0.0259967	0.483278	1.51802	0.748782	0	1	0			C20orf107
140	MSPI0406S00072068	PFKFB2	4.26411e-19	0	1.69964e-11	0	1.82199	2.43958	2.49251	1	1	1			C20orf117
140	MSPI0406S00072068	YOD1	4.26411e-19	0	1.69964e-11	0	1.82199	2.43958	2.49251	1	1	1			C20orf132
141	MSPI0406S00072804		4.10198e-10	7.18879e-07	1	1.27554e-06	1.47514	-0.210017	1.68636	0	0	1			C20orf27
142	MSPI0406S00073232	C1orf97	1.60838e-06	0.102512	0.0018311	5.19669e-05	-0.708717	-1.90521	-1.64945	0	1	1			C20orf70
143	MSPI0406S00074427	CENPF	8.69213e-07	0.191343	0.935842	8.38716e-06	0.559013	0.42075	1.6102	0	0	1			C20orf85
144	MSPI0406S00076405	DEGS1	1.60828e-29	1.1082e-10	0.573159	0.00279263	1.53874	0.461478	-0.859243	1	0	0			C21orf128
145	MSPI0406S00078116	ZNF678	5.05962e-12	1.43657e-05	1.03893e-05	6.74729e-12	1.28446	2.09241	2.3252	0	1	1			C21orf129
146	MSPI0406S00078453	ARF1	4.06661e-18	6.31432e-09	0.000982328	1	2.15428	2.05059	-0.180861	1	1	0			C21orf22
147	MSPI0406S00078498	GUK1	2.30924e-11	1.10238e-06	0.00231038	1	1.84411	2.02372	0.267279	1	1	0			C21orf84
148	MSPI0406S00078499	GUK1	5.78807e-08	3.4047e-06	0.00135297	0.309956	1.30413	1.5398	0.495027	0	1	0			C21orf90
149	MSPI0406S00079367	ABCB10	6.02764e-05	0.263225	0.000103122	0.489895	0.47636	1.97462	0.436394	0	1	0			C22orf26
150	MSPI0406S00080117		0.00882546	0.316153	0.00758572	0.245413	0.505514	1.60443	0.641311	0	1	0			C22orf28
151	MSPI0406S00082353	ERO1LB	4.45819e-09	3.96304e-07	9.64443e-06	0.0661184	1.79936	2.58541	0.890742	1	1	0			C22orf32
152	MSPI0406S00082673	MTR	4.14097e-08	0.00181597	1.07464e-06	5.12033e-06	0.856911	2.10314	1.35842	0	1	0			C22orf36
153	MSPI0406S00083922	OPN3	2.91433e-18	0	0.000176283	6.98786e-14	-2.55001	-1.74685	-2.44658	1	1	1			C22orf40
154	MSPI0406S00086422	C1orf229	3.68164e-07	0.000318696	0.000343161	4.58649e-07	1.04496	1.68341	1.62465	0	1	1			C2orf24
155	MSPI0406S00092671	YWHAQ	9.4409e-08	0.00530854	3.28594e-06	1.01875e-05	0.821274	2.05956	1.39218	0	1	0			C2orf50
156	MSPI0406S00093262	HPCAL1	2.31834e-24	4.82831e-12	0.163667	0.947608	2.37737	0.989491	-0.269464	1	0	0			C2orf53
157	MSPI0406S00093757	PDIA6	4.97666e-05	0.0246585	0.00258017	0.00013693	0.824235	1.70697	1.4239	0	1	0			C3orf23
158	MSPI0406S00093981	C2orf50	2.98526e-09	4.84561e-08	0.000437189	4.93758e-10	1.31684	1.44124	1.73262	0	0	1			C3orf42
159	MSPI0406S00094403	LPIN1	2.41817e-12	8.40764e-12	1.09816e-06	1.60195e-12	1.4162	1.62493	1.70584	0	1	1			C3orf55
160	MSPI0406S00097416		7.49567e-08	0.358624	0.000442472	0.000125984	0.372763	1.54205	1.1944	0	1	0			C3orf60
161	MSPI0406S00097417		1.30556e-09	0.00152862	0.000129188	1.26446e-08	0.877776	1.75662	1.73406	0	1	1			C3orf67
162	MSPI0406S00098058	ADCY3	1.48334e-17	0.903074	0.274526	7.56124e-11	0.221792	0.825513	2.3743	0	0	1			C4orf42
163	MSPI0406S00099362	KCNK3	6.96997e-17	2.40201e-11	0.000238599	0.552765	1.93025	1.79065	0.38188	1	1	0			C5orf34
164	MSPI0406S00099581	MAPRE3	4.38124e-11	4.43249e-09	0.00451882	0.0679076	-1.74154	-1.44466	-0.723016	1	0	0			C5orf41
165	MSPI0406S00099734	C2orf53	9.33674e-08	7.06594e-06	3.04928e-05	8.67642e-08	1.17702	1.78749	1.58896	0	1	1			C6orf1
165	MSPI0406S00099734	PREB	9.33674e-08	7.06594e-06	3.04928e-05	8.67642e-08	1.17702	1.78749	1.58896	0	1	1			C6orf195
166	MSPI0406S00099845	DNAJC5G	7.61999e-08	0.0684519	0.000156593	1.06236e-05	0.514794	1.52417	1.18987	0	1	0			C6orf62
166	MSPI0406S00099845	SLC30A3	7.61999e-08	0.0684519	0.000156593	1.06236e-05	0.514794	1.52417	1.18987	0	1	0			C6orf81
167	MSPI0406S00100028	IFT172	8.43637e-08	8.49743e-06	1.69509e-05	6.89749e-07	1.05597	1.70489	1.42284	0	1	0			C7orf26
168	MSPI0406S00100029	FNDC4	4.37563e-06	0.000636852	0.000146442	9.97316e-06	0.993664	1.78388	1.40759	0	1	0			C7orf61
168	MSPI0406S00100029	IFT172	4.37563e-06	0.000636852	0.000146442	9.97316e-06	0.993664	1.78388	1.40759	0	1	0			C8orf40
169	MSPI0406S00100074	ZNF512	1.8782e-32	1	0	0.120305	0.10884	4.50875	0.488082	0	1	0			C8orf56
170	MSPI0406S00100075	ZNF512	5.80668e-19	0.813253	5.88633e-13	0.516596	-0.190886	2.80704	-0.326847	0	1	0			C8orf74
171	MSPI0406S00100174	MRPL33	4.21252e-05	0.288333	0.39682	0.000178857	0.574734	0.863012	1.61305	0	0	1			C8orfK29
172	MSPI0406S00100215	BRE	1.55276e-19	0.488902	0.821797	2.52685e-08	-0.432232	-0.518496	2.22001	0	0	1			C9orf100
172	MSPI0406S00100215	LOC100302650	1.55276e-19	0.488902	0.821797	2.52685e-08	-0.432232	-0.518496	2.22001	0	0	1			C9orf116
172	MSPI0406S00100215	RBKS	1.55276e-19	0.488902	0.821797	2.52685e-08	-0.432232	-0.518496	2.22001	0	0	1			C9orf117
173	MSPI0406S00100495	PLB1	9.60501e-09	9.6866e-09	0.229565	0.00198592	2.38415	1.15742	1.5317	1	0	1			C9orf119
174	MSPI0406S00101576		2.74598e-05	0.165213	0.800729	0.000175997	0.690959	0.5792	1.72824	0	0	1			C9orf140
175	MSPI0406S00103245	QPCT	1.50271e-15	4.30551e-05	0.0138425	0.314107	1.57163	1.61124	-0.63517	1	0	0			C9orf25
176	MSPI0406S00103246	QPCT	9.56067e-09	4.18892e-06	2.12997e-05	0.290819	1.64295	2.54286	0.641562	1	1	0			C9orf4
177	MSPI0406S00104557	COX7A2L	0.000613482	0.0764658	0.000485549	0.33029	0.895196	2.46246	0.71985	0	1	0			C9orf47
178	MSPI0406S00105931		2.31554e-09	0.000328039	1	2.17682e-08	0.932318	0.0751668	1.59034	0	0	1			C9orf69
179	MSPI0406S00106103		2.95574e-06	8.34937e-06	0.267918	2.61028e-06	1.58884	0.932847	1.86505	1	0	1			C9orf79
180	MSPI0406S00109458	REL	3.14449e-19	6.93105e-09	1.39473e-07	0	-1.11895	-1.64866	-2.16343	0	1	1			CA2
181	MSPI0406S00109598	AHSA2	5.25821e-10	3.37181e-07	0.124287	0.57417	1.64442	1.03981	0.430716	1	0	0			CA6
182	MSPI0406S00110302	EHBP1	3.95631e-08	5.16809e-06	0.000336761	0.315002	-1.78312	-2.3688	-0.68183	1	1	0			CACNA1B
183	MSPI0406S00113727	SMYD5	5.95365e-17	0	1.33554e-07	5.22989e-14	1.62553	1.45275	1.51803	1	0	1			CACNA1H
184	MSPI0406S00113728	SMYD5	9.80748e-14	1.67356e-13	1.16245e-07	7.87559e-14	1.41558	1.57933	1.62691	0	1	1			CACNA1I
185	MSPI0406S00114345	LBX2	2.6764e-07	6.13655e-06	0.0151943	5.8399e-08	1.27939	1.25308	1.75244	0	0	1			CACNA2D1
185	MSPI0406S00114345	LOC151534	2.6764e-07	6.13655e-06	0.0151943	5.8399e-08	1.27939	1.25308	1.75244	0	0	1			CACNB1
185	MSPI0406S00114345	PCGF1	2.6764e-07	6.13655e-06	0.0151943	5.8399e-08	1.27939	1.25308	1.75244	0	0	1			CACNG7
186	MSPI0406S00114368	AUP1	5.25692e-27	0	0	0	3.74824	3.78535	2.95787	1	1	1			CADM4
186	MSPI0406S00114368	HTRA2	5.25692e-27	0	0	0	3.74824	3.78535	2.95787	1	1	1			CALD1
187	MSPI0406S00114541	POLE4	7.68012e-14	0	7.09447e-08	2.31398e-07	-1.94881	-2.10817	-1.39557	1	1	0			CALHM1
188	MSPI0406S00114857	LRRTM4	8.79837e-09	2.40196e-07	7.4236e-05	0.153789	1.56261	2.06574	0.676545	1	1	0			CALHM2
189	MSPI0406S00116129	CAPG	4.43543e-14	3.43829e-09	2.55443e-07	1.32947e-14	1.01491	1.38568	1.54382	0	0	1			CALML5
190	MSPI0406S00116674	IMMT	7.72935e-08	0.00120722	0.000570087	1	1.02581	1.76492	0.0798091	0	1	0			CAMK1D
190	MSPI0406S00116674	MRPL35	7.72935e-08	0.00120722	0.000570087	1	1.02581	1.76492	0.0798091	0	1	0			CAMK2D
191	MSPI0406S00116840	RNF103	5.33473e-10	7.42193e-08	5.79635e-08	6.96239e-09	1.24736	2.02546	1.54249	0	1	1			CAMKV
192	MSPI0406S00117698	RPIA	2.85724e-11	0.020734	7.73644e-08	2.72772e-07	0.460788	1.55618	1.04201	0	1	0			CAMP
193	MSPI0406S00118334	MAL	2.12322e-15	5.22541e-08	1.00921e-07	6.98786e-14	1.35002	2.15248	2.37255	0	1	1			CAPG
194	MSPI0406S00119018		4.18705e-07	3.66351e-07	0.0162009	2.25084e-07	1.78433	1.53419	2.03259	1	0	1			CAPN10
195	MSPI0406S00119029	CIAO1	1.41971e-17	1.66944e-06	0.877634	0.549176	1.70684	-0.485663	-0.484643	1	0	0			CAPN5
195	MSPI0406S00119029	TMEM127	1.41971e-17	1.66944e-06	0.877634	0.549176	1.70684	-0.485663	-0.484643	1	0	0			CARD14
196	MSPI0406S00119201	ARID5A	1.16208e-06	1.77487e-05	0.00179509	4.27386e-07	1.48836	1.77565	1.87496	0	1	1			CARHSP1
197	MSPI0406S00119479	ANKRD23	8.15904e-12	7.66335e-09	4.22182e-08	6.69915e-12	1.10365	1.67609	1.50624	0	1	1			CASP9
198	MSPI0406S00119511	SEMA4C	2.10602e-15	4.46089e-13	1.8193e-05	0	1.21539	1.10178	1.57386	0	0	1			CBLN1
199	MSPI0406S00119895	ZAP70	1.89671e-28	0	0.0295114	1	1.70349	0.81216	-0.106345	1	0	0			CBLN3
200	MSPI0406S00120890	AFF3	6.3591e-09	6.5025e-08	0.00114097	0.0520101	1.88922	1.98605	0.915267	1	1	0			CC2D1B
201	MSPI0406S00121899	IL1R2	3.72968e-11	1	0.69721	9.94064e-07	0.189971	0.654278	2.12054	0	0	1			CCDC102A
202	MSPI0406S00122908	NCK2	5.94924e-16	1.31413e-10	1	0.220204	1.9777	0.0221937	0.592193	1	0	0			CCDC108
203	MSPI0406S00124982	ACOXL	7.24791e-08	0.000555765	7.78924e-07	0.297083	1.77687	4.03426	0.88878	1	1	0			CCDC12
204	MSPI0406S00128707	TFCP2L1	1.82581e-11	2.53535e-05	0.0210788	4.13879e-12	1.8177	1.81077	3.39021	1	0	1			CCDC140
205	MSPI0406S00129703	GYPC	2.79561e-19	1.11881e-11	0.0578738	1	2.13032	1.12533	0.172057	1	0	0			CCDC19
206	MSPI0406S00130000	BIN1	5.95296e-10	0.000585238	0.00304227	4.99413e-10	1.27957	1.8771	2.55533	0	1	1			CCDC28B
207	MSPI0406S00130151	PROC	6.90211e-14	3.85014e-07	1.61284e-06	4.27828e-14	1.1171	1.74445	1.96712	0	1	1			CCDC71
208	MSPI0406S00130284		1.53547e-20	0.0455502	0.000125393	0	0.607182	1.71154	2.4888	0	1	1			CCDC80
209	MSPI0406S00130285		2.09718e-21	0.500308	1	1.45945e-09	-0.452121	0.266869	2.58571	0	0	1			CCDC87
210	MSPI0406S00130339	GPR17	1.08809e-09	0.0872172	0.000904442	1.71371e-07	0.741365	2.02	2.11262	0	1	1			CCDC96
210	MSPI0406S00130339	LIMS2	1.08809e-09	0.0872172	0.000904442	1.71371e-07	0.741365	2.02	2.11262	0	1	1			CCL1
211	MSPI0406S00131861	PTPN18	1.25485e-11	7.7819e-09	0.00558504	0.318281	1.93916	1.69181	0.58506	1	1	0			CCL22
212	MSPI0406S00132094	GPR148	1.14005e-09	1.64225e-08	0.000899009	0.0343567	1.50178	1.51859	0.729863	1	1	0			CCL25
213	MSPI0406S00132095	GPR148	2.99776e-07	7.48483e-07	0.000324272	0.0201291	1.60791	1.96385	0.968273	1	1	0			CCM2
214	MSPI0406S00132982		5.16262e-05	4.6833e-05	0.432327	0.0469233	1.70461	0.920374	1.09306	1	0	0			CCND3
215	MSPI0406S00133288		1.32449e-09	0.0188405	4.10351e-06	4.23164e-07	0.636675	1.83092	1.38911	0	1	0			CCR6
216	MSPI0406S00133502		1.21122e-08	5.68532e-08	1	1.80646e-05	2.44816	0.380404	2.2113	1	0	1			CCS
217	MSPI0406S00133866	DARS	9.91114e-08	7.74364e-08	7.5262e-06	3.32036e-05	2.29704	3.10885	2.212	1	1	1			CD180
218	MSPI0406S00134288	NXPH2	3.08931e-07	0.781459	0.00391626	0.337028	0.270629	-1.5808	-0.53195	0	1	0			CD2BP2
219	MSPI0406S00135525	KIF5C	2.63268e-06	1.54751e-06	0.00821952	3.13942e-05	1.2501	1.63991	1.34925	0	1	0			CD300C
220	MSPI0406S00136658	KCNJ3	4.1909e-12	6.01556e-12	0.00010578	2.8558e-11	1.99525	1.72475	2.04678	1	1	1			CD33
221	MSPI0406S00137373		1.36848e-12	0.000123304	1.87653e-12	1.94858e-06	0.715934	2.2382	1.00304	0	1	0			CD63
222	MSPI0406S00137502	BAZ2B	4.31929e-15	1	1	2.95796e-08	0.0354728	0.00661998	1.96873	0	0	1			CD68
223	MSPI0406S00140608	WIPF1	2.33229e-21	1.40529e-10	1	1	2.28773	0.232871	-0.142372	1	0	0			CD72
224	MSPI0406S00141009	HOXD3	9.83588e-12	3.46329e-12	0.0163929	2.10313e-09	1.79647	1.08814	1.67481	1	0	1			CD79B
225	MSPI0406S00141792	UBE2E3	5.09463e-10	2.35709e-09	0.0170704	0.0113136	1.56397	1.12993	0.822156	1	0	0			CD81
226	MSPI0406S00141848	CERKL	4.39688e-14	1.94481e-12	2.19404e-05	3.40047e-14	1.37216	1.29327	1.75143	0	0	1			CD9
226	MSPI0406S00141848	NEUROD1	4.39688e-14	1.94481e-12	2.19404e-05	3.40047e-14	1.37216	1.29327	1.75143	0	0	1			CDC123
227	MSPI0406S00141974	DNAJC10	4.57089e-09	4.27469e-05	0.01199	9.0265e-10	-1.16912	-1.27925	-1.98323	0	0	1			CDCA4
228	MSPI0406S00142666	COL5A2	1.32817e-05	0.012292	6.23427e-05	0.582581	0.866395	2.15817	0.411734	0	1	0			CDCA5
229	MSPI0406S00143798	GTF3C3	6.45377e-15	0.000785384	3.78176e-09	8.09047e-12	0.703307	1.92529	1.60761	0	1	1			CDH13
230	MSPI0406S00144141	MARS2	2.01903e-10	1.53063e-05	0.000266353	3.66909e-11	1.08761	1.47444	1.81315	0	0	1			CDH2
231	MSPI0406S00144157	BOLL	0.000231663	0.0387212	0.00383367	0.00123693	-0.76596	-1.63587	-1.266	0	1	0			CDH5
232	MSPI0406S00146431		1.21627e-29	1.35429e-07	0.0570009	6.17934e-06	1.74165	1.23416	-1.71245	1	0	1			CDH6
233	MSPI0406S00148164	ABCA12	5.58848e-09	0.00977278	0.00574415	0.749479	1.03463	1.79325	-0.404089	0	1	0			CDK3
234	MSPI0406S00149142	TNS1	9.74657e-05	0.0603691	0.477661	0.000119648	0.768032	0.739811	1.57101	0	0	1			CDKL3
235	MSPI0406S00149209	RUFY4	7.60847e-06	6.06874e-05	2.31077e-05	0.00556263	1.65375	2.81366	1.3901	1	1	0			CDKN1A
236	MSPI0406S00149664	BCS1L	2.18177e-08	1.0076e-06	1.54016e-05	1.64432e-08	1.17073	1.70814	1.53985	0	1	1			CDKN2B
236	MSPI0406S00149664	ZNF142	2.18177e-08	1.0076e-06	1.54016e-05	1.64432e-08	1.17073	1.70814	1.53985	0	1	1			CDKN2C
237	MSPI0406S00149938		0.000287331	0.00110596	0.00505237	0.000585502	1.2526	1.77197	1.48161	0	1	0			CDS2
238	MSPI0406S00149952	CCDC108	4.86814e-05	0.0697099	0.297674	4.50546e-05	0.890498	1.05197	1.9094	0	0	1			CEACAM8
239	MSPI0406S00150035	C2orf24	1.75159e-13	9.47891e-09	7.97687e-07	4.27828e-14	1.46862	2.05986	2.31986	0	1	1			CEBPA
239	MSPI0406S00150035	FAM134A	1.75159e-13	9.47891e-09	7.97687e-07	4.27828e-14	1.46862	2.05986	2.31986	0	1	1			CELSR2
240	MSPI0406S00150073	ABCB6	4.88388e-05	0.000219382	0.0234951	1.74468e-05	1.19304	1.32576	1.56357	0	0	1			CENPF
241	MSPI0406S00150109	TUBA4A	1.63156e-20	0	1	0.000782164	1.95446	0.155339	0.901169	1	0	0			CENPT
241	MSPI0406S00150109	TUBA4B	1.63156e-20	0	1	0.000782164	1.95446	0.155339	0.901169	1	0	0			CEPT1
242	MSPI0406S00150385	CHPF	2.79081e-17	0	7.94657e-08	0	1.29581	1.3146	1.63555	0	0	1			CERKL
242	MSPI0406S00150385	TMEM198	2.79081e-17	0	7.94657e-08	0	1.29581	1.3146	1.63555	0	0	1			CES3
243	MSPI0406S00150502		0.000240329	0.98401	0.000911345	0.642842	0.158679	1.51985	0.336875	0	1	0			CFD
244	MSPI0406S00151091	CCDC140	1.10404e-13	1.13648e-12	9.13744e-07	6.98786e-14	1.45262	1.5646	1.77627	0	1	1			CH25H
244	MSPI0406S00151091	PAX3	1.10404e-13	1.13648e-12	9.13744e-07	6.98786e-14	1.45262	1.5646	1.77627	0	1	1			CHCHD2
245	MSPI0406S00152112	IRS1	6.39137e-06	0.0056494	0.925011	4.24649e-06	0.99624	0.443453	1.71218	0	0	1			CHMP1A
246	MSPI0406S00152139		4.78385e-12	2.34963e-11	0.134603	8.99231e-11	-1.49421	-0.692632	-1.6605	0	0	1			CHPF
247	MSPI0406S00152218	COL4A3	4.19141e-06	3.14673e-05	0.830007	6.33228e-06	1.45404	0.551061	1.81555	0	0	1			CHRAC1
247	MSPI0406S00152218	COL4A4	4.19141e-06	3.14673e-05	0.830007	6.33228e-06	1.45404	0.551061	1.81555	0	0	1			CHRNB1
248	MSPI0406S00152504	WDR69	7.38735e-07	0.287766	1.0245e-05	1	0.407099	1.91078	0.0624678	0	1	0			CHTF18
249	MSPI0406S00153099	SP100	4.13828e-13	1.94065e-05	0.000138341	2.44103e-13	0.99713	1.50378	1.90902	0	1	1			CIAO1
250	MSPI0406S00153299	ITM2C	2.55377e-08	0.000168292	1	8.02118e-08	1.27987	0.300579	2.02303	0	0	1			CIC
251	MSPI0406S00153300	ITM2C	3.45367e-06	0.00125285	1	8.26245e-06	1.04393	0.245722	1.52269	0	0	1			CIDEB
252	MSPI0406S00154536	ECEL1	5.31322e-10	2.46361e-08	1.96603e-05	9.99725e-11	1.14375	1.40781	1.50286	0	0	1			CILP
253	MSPI0406S00154537	ECEL1	1.82099e-12	6.67926e-12	1.29703e-06	5.11645e-13	1.53442	1.71854	1.84354	1	1	1			CIZ1
254	MSPI0406S00155755	ARL4C	9.01446e-18	0.389522	1.69964e-11	0.713796	-0.264105	2.11777	0.220734	0	1	0			CKLF
255	MSPI0406S00155756	ARL4C	1.45852e-10	1	1.24565e-07	0.989752	-0.0728562	2.61792	0.230061	0	1	0			CKMT2
256	MSPI0406S00157819	LRRFIP1	3.18781e-15	0	4.10166e-06	6.33408e-12	1.50233	1.28566	1.35096	1	0	0			CLCNKA
257	MSPI0406S00158131	ESPNL	4.67585e-13	6.42951e-14	0.00133672	1.37358e-10	1.57353	1.08746	1.4519	1	0	0			CLCNKB
258	MSPI0406S00158132	ESPNL	2.62608e-13	1.19872e-12	0.00197162	1.19695e-13	1.73936	1.2983	2.08337	1	0	1			CLDN4
259	MSPI0406S00158208		3.33754e-10	0.0885795	0.023187	2.41616e-08	0.550467	1.1133	1.68356	0	0	1			CLDN8
260	MSPI0406S00159043		2.1712e-31	2.55586e-06	0	3.99016e-07	0.461171	2.25308	0.565659	0	1	0			CLDND2
261	MSPI0406S00159044		2.81793e-21	1	0	0.827927	0.0163326	2.72994	0.187201	0	1	0			CLEC11A
262	MSPI0406S00159853	OR6B3	9.91517e-07	3.03907e-06	2.76576e-05	0.00820647	1.24616	1.85007	0.901978	0	1	0			CLEC4D
262	MSPI0406S00159853	PRR21	9.91517e-07	3.03907e-06	2.76576e-05	0.00820647	1.24616	1.85007	0.901978	0	1	0			CLPTM1L
263	MSPI0406S00159854	OR6B3	0.000106707	0.000731997	0.000214383	0.00462102	1.07571	1.90244	1.06687	0	1	0			CLSTN3
263	MSPI0406S00159854	PRR21	0.000106707	0.000731997	0.000214383	0.00462102	1.07571	1.90244	1.06687	0	1	0			CMIP
264	MSPI0406S00160351	CAPN10	0.000515482	0.0047922	0.000964649	0.00746464	1.10796	2.08918	1.21661	0	1	0			CMTM2
265	MSPI0406S00160352	CAPN10	8.06669e-06	0.00352956	5.32775e-05	0.000108968	1.26751	2.69558	1.80499	0	1	1			CMTM5
266	MSPI0406S00161795		1.09659e-05	0.015464	0.00200179	1	1.02219	2.07453	0.146114	0	1	0			CNP
267	MSPI0406S00162805	CRBN	9.3746e-17	1.51555e-07	4.53431e-11	0	1.14108	2.34919	2.06266	0	1	1			CNTROB
268	MSPI0406S00163316	EDEM1	8.40651e-11	7.92008e-11	0.00276742	0.000636372	1.59103	1.25794	0.963713	1	0	0			COASY
269	MSPI0406S00163318	EDEM1	3.12443e-31	0	0.00429476	0.311123	1.85229	1.11111	-0.384448	1	0	0			COG8
270	MSPI0406S00163586	GRM7	1.10546e-06	0.00272564	0.00311274	8.80968e-07	-0.903517	-1.42926	-1.56061	0	0	1			COL1A1
271	MSPI0406S00164166	SRGAP3	2.67043e-07	0.0652813	1	1.35379e-05	0.734888	-0.312341	1.65069	0	0	1			COL25A1
272	MSPI0406S00164450	BRPF1	0.0004709	0.00728607	0.0163929	0.816367	-1.58249	-2.348	-0.54663	1	0	0			COL4A3
273	MSPI0406S00164466	OGG1	2.76589e-16	0.23064	0.0015927	2.08712e-11	0.487941	1.63034	2.29433	0	1	1			COL4A3BP
274	MSPI0406S00164616	IL17RE	1.1305e-12	5.68813e-11	0.116684	1.91316e-12	1.54143	0.763853	1.94336	1	0	1			COL4A4
275	MSPI0406S00164973	C3orf42	4.41013e-12	3.81043e-08	0.254367	0.716164	2.22081	1.08377	0.460087	1	0	0			COL5A2
275	MSPI0406S00164973	TATDN2/GHRLOS_fusion	4.41013e-12	3.81043e-08	0.254367	0.716164	2.22081	1.08377	0.460087	1	0	0			COMT
276	MSPI0406S00164980	GHRL	1.371e-08	8.74619e-05	6.69811e-05	0.88386	1.73902	2.9436	0.404625	1	1	0			COPB1
277	MSPI0406S00164981	GHRL	1.19319e-10	2.82968e-10	1.44407e-05	0.00111376	2.05106	2.27327	1.22792	1	1	0			COX7A2L
278	MSPI0406S00165983	SYN2	9.35056e-06	0.000751514	9.85356e-05	5.7338e-05	0.991872	1.85718	1.30878	0	1	0			COX7C
279	MSPI0406S00166547	IQSEC1	1.22971e-10	0.183976	0.995035	4.26479e-08	0.553629	0.353655	1.96823	0	0	1			CPA1
280	MSPI0406S00169952	TOP2B	3.59307e-16	3.30268e-11	3.68738e-07	0.278805	2.28077	2.83161	0.609992	1	1	0			CPD
281	MSPI0406S00170535	RBMS3	3.05497e-13	8.98439e-14	0.00909465	8.58759e-08	1.75708	1.04883	1.34883	1	0	0			CPNE7
282	MSPI0406S00172555	VILL	2.10171e-11	7.5897e-05	9.68802e-08	5.71255e-10	1.28319	2.79162	2.28719	0	1	1			CRABP1
283	MSPI0406S00172940	SCN10A	4.87161e-11	1.69528e-10	1.56222e-08	7.81706e-09	1.3099	1.98763	1.36097	0	1	0			CRAT
284	MSPI0406S00173036	CSRNP1	4.62104e-09	1.3706e-09	0.00922455	0.00061142	1.61986	1.24704	1.07842	1	0	0			CRBN
285	MSPI0406S00174169		2.66919e-07	0.00265201	3.28242e-07	0.120399	0.583611	1.52578	0.414014	0	1	0			CRTC3
286	MSPI0406S00174475	C3orf23	6.43852e-11	5.15073e-09	0.131085	0.12144	1.52457	0.831502	0.588802	1	0	0			CRYM
287	MSPI0406S00175023	LIMD1	1.05913e-15	7.60047e-10	1	0.726008	2.15118	0.286267	0.392213	1	0	0			CSAD
288	MSPI0406S00175202	XCR1	6.72728e-10	8.31121e-09	0.833735	1.76138e-08	1.61744	0.424174	1.81598	1	0	1			CSRNP1
289	MSPI0406S00175379		0.000285277	0.00015562	0.0138106	0.0346278	1.64246	1.92295	1.18489	1	0	0			CST11
290	MSPI0406S00175482	ALS2CL	0.000318911	0.00924202	0.0553806	0.000212651	1.00672	1.3189	1.57441	0	0	1			CST4
291	MSPI0406S00175679	CCDC12	1.06658e-11	2.37781e-10	2.337e-05	9.62402e-13	1.20458	1.2831	1.52535	0	0	1			CST8
291	MSPI0406S00175679	NBEAL2	1.06658e-11	2.37781e-10	2.337e-05	9.62402e-13	1.20458	1.2831	1.52535	0	0	1			CST9
292	MSPI0406S00176030	SCAP	7.38191e-06	0.00233369	2.76576e-05	0.231644	1.54252	3.34897	0.930013	1	1	0			CTBP1
293	MSPI0406S00176031	SCAP	5.26331e-05	0.00119835	0.000128989	0.0451427	1.74517	3.29026	1.36606	1	1	0			CTCF
294	MSPI0406S00176586	CAMP	1.09211e-05	1.10695e-05	0.00090662	2.13009e-05	1.39132	1.77992	1.5184	0	1	1			CTDP1
295	MSPI0406S00176781	SHISA5	6.99139e-18	0.000455132	7.21083e-06	1.32947e-14	0.758704	1.55259	2.01452	0	1	1			CTDSP2
296	MSPI0406S00176845	PFKFB4	1.81405e-11	0.00148736	0.0997932	3.85237e-11	0.860137	0.868807	1.94613	0	0	1			CTRB2
296	MSPI0406S00176845	UCN2	1.81405e-11	0.00148736	0.0997932	3.85237e-11	0.860137	0.868807	1.94613	0	0	1			CTSA
297	MSPI0406S00176846	PFKFB4	4.33782e-25	0.00351364	0.00260164	0	0.949393	1.62971	3.51919	0	1	1			CTSD
297	MSPI0406S00176846	UCN2	4.33782e-25	0.00351364	0.00260164	0	0.949393	1.62971	3.51919	0	1	1			CTSZ
298	MSPI0406S00177277	C3orf60	2.66331e-15	1.94867e-14	9.82063e-07	0	1.28022	1.23176	1.52053	0	0	1			CUEDC1
298	MSPI0406S00177277	DALRD3	2.66331e-15	1.94867e-14	9.82063e-07	0	1.28022	1.23176	1.52053	0	0	1			CUTA
298	MSPI0406S00177277	NDUFAF3	2.66331e-15	1.94867e-14	9.82063e-07	0	1.28022	1.23176	1.52053	0	0	1			CXCL16
299	MSPI0406S00177389	USP19	1.04841e-23	0.000597832	0.000515498	0	0.687589	1.13973	2.21014	0	0	1			CXCL6
300	MSPI0406S00177433	CCDC71	1.76831e-17	0.168549	0.0376017	1.30846e-12	0.362182	0.794258	1.68599	0	0	1			CYFIP1
301	MSPI0406S00177688	RHOA	1.33457e-06	3.73016e-06	0.000485767	0.0172622	1.2912	1.72994	0.84309	0	1	0			CYFIP2
301	MSPI0406S00177688	TCTA	1.33457e-06	3.73016e-06	0.000485767	0.0172622	1.2912	1.72994	0.84309	0	1	0			CYP4F11
302	MSPI0406S00177689	RHOA	1.65135e-06	8.4975e-06	0.000115454	0.0259842	1.24954	1.82445	0.808831	0	1	0			CYTH1
302	MSPI0406S00177689	TCTA	1.65135e-06	8.4975e-06	0.000115454	0.0259842	1.24954	1.82445	0.808831	0	1	0			DALRD3
303	MSPI0406S00177955	AMIGO3	5.04389e-09	3.99322e-07	9.32027e-07	1.42821e-08	1.18482	1.86312	1.51888	0	1	1			DAPK1
303	MSPI0406S00177955	GMPPB	5.04389e-09	3.99322e-07	9.32027e-07	1.42821e-08	1.18482	1.86312	1.51888	0	1	1			DARS
304	MSPI0406S00178089	CAMKV	1.49784e-21	9.87948e-05	3.52682e-07	0	1.04358	2.23312	2.82267	0	1	1			DAXX
305	MSPI0406S00178119	MST1R	1.05031e-10	8.62021e-05	0.000216205	7.86023e-11	0.818676	1.27159	1.52816	0	0	1			DBN1
306	MSPI0406S00178568	TMEM115	2.81318e-13	0.00547697	0.0421158	5.428e-12	0.631907	0.818437	1.67663	0	0	1			DBNDD1
307	MSPI0406S00179192	TEX264	1.06299e-09	2.56976e-09	6.526e-06	1.09413e-09	1.31308	1.62511	1.54525	0	1	1			DCAF4L2
308	MSPI0406S00179678	GLYCTK	3.29702e-09	0.86069	1.14872e-06	0.0146832	0.28042	2.91087	1.12832	0	1	0			DCAKD
308	MSPI0406S00179678	GLYCTK1	3.29702e-09	0.86069	1.14872e-06	0.0146832	0.28042	2.91087	1.12832	0	1	0			DCDC2B
309	MSPI0406S00180108	ITIH3	1.45611e-13	0.000405869	1.41983e-10	1	0.927241	2.6192	0.103085	0	1	0			DDAH2
310	MSPI0406S00180109	ITIH3	2.09748e-10	0.000497011	3.78176e-09	0.205819	0.839934	2.32474	0.461454	0	1	0			DDIT3
311	MSPI0406S00180110	ITIH3	2.02721e-06	0.000179332	5.27562e-05	0.157798	1.88812	3.34713	1.04647	1	1	0			DDX19A
312	MSPI0406S00180169	ITIH4	3.74967e-05	1.75385e-05	0.0161877	0.0202512	2.31918	2.35213	1.58297	1	0	0			DDX19B
312	MSPI0406S00180169	MUSTN1	3.74967e-05	1.75385e-05	0.0161877	0.0202512	2.31918	2.35213	1.58297	1	0	0			DDX3X
313	MSPI0406S00181757	APPL1	0.000228229	0.531132	0.000495787	0.243146	0.446749	2.24859	0.72126	0	1	0			DDX47
314	MSPI0406S00182325	PXK	1.78295e-19	1.25994e-10	0.130672	1	2.53255	1.23073	-0.0655691	1	0	0			DEAF1
315	MSPI0406S00182580	C3orf67	2.03611e-08	6.51235e-09	5.30388e-05	1.68702e-06	-1.49529	-1.68942	-1.46023	0	1	0			DEF6
316	MSPI0406S00190637	PLCXD2	0.000542515	0.000137986	0.0849247	0.00189915	1.58909	1.43486	1.53443	1	0	1			DEGS1
317	MSPI0406S00190675	PHLDB2	5.10325e-13	0.71128	2.22747e-11	0.681732	0.219708	2.52478	0.274115	0	1	0			DEGS2
318	MSPI0406S00190829	CCDC80	1.30014e-06	0.0108485	0.00071863	1.5172e-05	1.13117	2.32914	2.09397	0	1	1			DENND3
319	MSPI0406S00195684	DNAJB8	1.19735e-09	0.986986	5.8495e-06	0.00564847	0.141815	1.85814	0.834802	0	1	0			DERL3
320	MSPI0406S00195821		1.76845e-05	1	0.818402	0.00232018	0.221807	0.761087	1.87916	0	0	1			DGCR6
321	MSPI0406S00196162	GP9	8.28422e-14	0.00119889	0.000128132	0.330176	1.13613	2.27485	-0.567817	0	1	0			DHCR7
322	MSPI0406S00196163	GP9	8.53354e-08	0.0141187	0.00630897	0.983866	1.14834	2.05462	-0.325325	0	1	0			DIAPH2
323	MSPI0406S00196441	RPL32P3	0.00174568	0.906971	0.00482291	0.914772	0.215571	1.56018	0.268479	0	1	0			DIRAS1
323	MSPI0406S00196441	SNORA7B	0.00174568	0.906971	0.00482291	0.914772	0.215571	1.56018	0.268479	0	1	0			DKFZp434I2135
324	MSPI0406S00196536		3.95353e-09	0.971929	0.000219395	0.000653303	0.20027	2.04601	1.34985	0	1	0			DKFZp434K028
325	MSPI0406S00196537		5.56704e-14	0.183194	9.37515e-08	4.09111e-08	0.456822	2.25627	1.61586	0	1	1			DKFZp434N177
326	MSPI0406S00196606	PLXND1	1.09979e-14	3.49e-10	0.900742	1.74543e-13	1.33694	0.277558	1.82552	0	0	1			DKFZp762B162
327	MSPI0406S00197429	TMEM108	1.22109e-11	0.520705	0.000390619	3.88921e-07	0.303486	1.51493	1.46976	0	1	0			DLAT
328	MSPI0406S00197488		6.23928e-13	0.017532	8.49643e-05	0.00238935	-0.877329	2.18992	-1.206	0	1	0			DLG4
329	MSPI0406S00197569	TOPBP1	2.90424e-11	9.98357e-11	1.22483e-06	1.48647e-11	1.44921	1.75265	1.71353	0	1	1			DLL1
330	MSPI0406S00197570	TOPBP1	4.72999e-12	8.94161e-13	8.38605e-06	1.47729e-11	1.64714	1.71411	1.73019	1	1	1			DNAH2
331	MSPI0406S00197602	TF	0.00135374	0.00353484	0.111176	0.000531405	-1.18553	-1.29925	-1.52193	0	0	1			DNAI1
332	MSPI0406S00197824	RYK	9.07159e-12	1.34228e-09	2.67332e-07	5.38254e-12	2.36836	3.13059	3.05018	1	1	1			DNAJB1
333	MSPI0406S00199004	FAIM	8.23845e-11	0.000603617	0.000862202	2.29215e-10	1.37229	2.27098	2.81086	0	1	1			DNAJB6
334	MSPI0406S00200768	PLSCR4	8.7935e-07	0.0953082	1.07044e-05	0.00143286	0.484306	1.71644	0.899671	0	1	0			DNAJB8
335	MSPI0406S00202811	C3orf55	0.000469223	0.0377086	0.00106135	0.00796531	-0.708139	-1.67041	-0.970399	0	1	0			DNAJC10
336	MSPI0406S00204488	LOC100128164	3.76294e-23	4.18524e-12	6.91763e-08	1	2.10928	2.65018	-0.145339	1	1	0			DNAJC16
336	MSPI0406S00204488	SEC62	3.76294e-23	4.18524e-12	6.91763e-08	1	2.10928	2.65018	-0.145339	1	1	0			DNAJC4
337	MSPI0406S00204489	LOC100128164	1.75037e-15	1.79777e-07	0.00341535	1	1.83352	1.80202	-0.161759	1	1	0			DNAJC5G
337	MSPI0406S00204489	SEC62	1.75037e-15	1.79777e-07	0.00341535	1	1.83352	1.80202	-0.161759	1	1	0			DNM1
338	MSPI0406S00204681	SKIL	5.13111e-16	0	5.91638e-07	0	-1.80656	-1.7091	-2.11166	1	1	1			DNM1P35
339	MSPI0406S00205137	FNDC3B	1.51231e-06	0.00181821	0.00961092	1.11467e-06	0.995568	1.4028	1.70384	0	0	1			DNTT
340	MSPI0406S00205237	GHSR	9.34885e-16	0	2.02112e-07	0	1.52914	1.5247	1.77063	1	1	1			DOLK
341	MSPI0406S00207880	MAP6D1	3.4843e-07	4.14252e-06	3.37302e-05	0.0278507	2.04313	2.99381	1.25198	1	1	0			DPF1
342	MSPI0406S00207881	MAP6D1	4.57083e-09	8.601e-06	8.21103e-09	2.83731e-05	1.99299	4.22088	2.10177	1	1	1			DPM2
343	MSPI0406S00208216	VWA5B2	1.79642e-18	0	0.00106244	0.0053586	2.37672	1.57458	0.951499	1	1	0			DRAM2
344	MSPI0406S00208286	PSMD2	3.3561e-10	0.0978152	0.30959	1.45542e-08	0.56011	0.694129	1.7782	0	0	1			DRD1
345	MSPI0406S00209229	IGF2BP2	9.99822e-10	0.203575	0.441663	1.19208e-07	0.735847	0.949274	2.58132	0	0	1			DSCR9
346	MSPI0406S00209786	ADIPOQ	9.53065e-16	0.000394278	1.99154e-11	2.42023e-10	0.974393	2.85522	2.00251	0	1	1			DUSP15
347	MSPI0406S00210106	BCL6	2.82148e-05	3.70127e-05	0.0297474	1.01875e-05	1.3198	1.2959	1.59101	0	0	1			DYNC1H1
348	MSPI0406S00211470		5.05875e-15	0	0.000578235	4.42555e-11	1.63609	1.15718	1.41555	1	0	0			DYNLT1
349	MSPI0406S00211751	LRRC15	2.8774e-16	4.18223e-12	0.000691496	0.116038	2.33031	1.85868	0.72418	1	1	0			EBF4
350	MSPI0406S00212653		8.53524e-06	0.0777158	0.0705116	2.09389e-05	0.762771	1.28523	1.74775	0	0	1			ECEL1
351	MSPI0406S00212703		4.66682e-14	0.0186624	2.13757e-08	8.98012e-10	0.714973	2.47894	1.89143	0	1	1			ECHDC3
352	MSPI0406S00212732	MUC4	2.80257e-09	0.395404	0.00923209	6.44656e-06	0.458704	1.58787	1.81182	0	1	1			ECM1
353	MSPI0406S00213295	TM4SF19	3.33766e-15	0.687118	0.4554	6.03381e-10	0.279612	0.622081	2.0293	0	0	1			EDEM1
354	MSPI0406S00213296	TM4SF19	9.00977e-14	0.498045	0.701641	2.05657e-09	0.296648	0.413559	1.67549	0	0	1			EDN2
355	MSPI0406S00213357	UBXN7	3.95248e-08	1.7835e-06	0.00052003	0.187376	-1.38365	-1.6845	-0.572597	0	1	0			EDN3
356	MSPI0406S00215783	C4orf42	9.78237e-08	0.0200551	1.51543e-06	0.000186938	0.505457	1.54068	0.865073	0	1	0			EEF1A1
356	MSPI0406S00215783	CTBP1	9.78237e-08	0.0200551	1.51543e-06	0.000186938	0.505457	1.54068	0.865073	0	1	0			EFCAB5
357	MSPI0406S00215883		1.9181e-10	0.0572234	0.0194502	2.69499e-08	0.584045	1.11692	1.70055	0	0	1			EFNA3
358	MSPI0406S00216567	WHSC1	5.96775e-14	1.57562e-09	6.10965e-09	5.22989e-14	0.978525	1.54043	1.45195	0	1	0			EFR3A
359	MSPI0406S00216611		2.22669e-13	0.00227449	1.57359e-05	1.26353e-11	0.624481	1.35867	1.5119	0	0	1			EHBP1
360	MSPI0406S00218112		1.18722e-09	1.1435e-05	6.50656e-05	7.79057e-10	1.15747	1.74903	1.85495	0	1	1			EHBP1L1
361	MSPI0406S00218346	ADRA2C	2.857e-13	1.32466e-05	9.20846e-06	1.60034e-13	0.934307	1.60336	1.86833	0	1	1			EIF2C2
362	MSPI0406S00218746	OTOP1	0.00109247	0.195404	0.00179599	0.0546482	-0.677846	-2.11485	-1.01606	0	1	0			ELF5
363	MSPI0406S00220409	KIAA0232	3.74183e-10	4.99852e-07	1.31658e-05	8.48701e-11	1.21412	1.70386	1.77332	0	1	1			ELK3
364	MSPI0406S00220410	KIAA0232	1.83584e-11	2.74476e-11	3.76305e-06	1.74271e-11	1.88342	2.08312	2.15332	1	1	1			ELTD1
365	MSPI0406S00220627	CCDC96	2.21365e-14	0.000135614	1.16625e-07	9.78644e-13	1.11922	2.43649	2.3333	0	1	1			EPHA2
365	MSPI0406S00220627	TADA2B	2.21365e-14	0.000135614	1.16625e-07	9.78644e-13	1.11922	2.43649	2.3333	0	1	1			EPS8L1
366	MSPI0406S00222028		3.45494e-14	6.58178e-05	0.000425788	1.28073e-13	1.29492	1.84638	2.73972	0	1	1			ERAP2
367	MSPI0406S00222029		1.84862e-16	0.000142406	0.000210984	1.32947e-14	0.967626	1.52609	2.31409	0	1	1			ERO1LB
368	MSPI0406S00222275		1.36694e-09	0.00730097	2.11059e-06	3.89385e-07	0.725399	1.98258	1.42675	0	1	0			ESAM
369	MSPI0406S00223002		6.47619e-08	5.55112e-08	0.396619	0.00125303	2.68959	1.14983	1.90224	1	0	1			ESPNL
370	MSPI0406S00224005	FBXL5	0.000149216	0.00596391	0.100093	3.84915e-05	0.999792	1.12936	1.57622	0	0	1			ETNK2
371	MSPI0406S00225214	GPR125	0.000625072	0.0595317	0.00147207	0.00955296	0.79708	1.95712	1.14422	0	1	0			EXOSC4
372	MSPI0406S00226169	SEL1L3	2.95824e-08	1	0.0285702	0.000301294	0.176046	1.73724	1.80838	0	0	1			EXTL3
373	MSPI0406S00226544	STIM2	2.16346e-06	6.71656e-05	0.000128609	3.06923e-06	1.17765	1.83827	1.54106	0	1	1			FAIM
374	MSPI0406S00226545	STIM2	0.00509727	0.0347995	0.00502187	0.100145	0.78808	1.61335	0.763764	0	1	0			FAM109B
375	MSPI0406S00227003	PCDH7	8.2607e-05	0.665806	0.624002	0.000798516	0.390658	0.703761	1.51355	0	0	1			FAM113B
376	MSPI0406S00229202	RBM47	3.22397e-09	1.86811e-08	0.00088201	4.377e-10	-1.28548	-1.3029	-1.62196	0	0	1			FAM134A
377	MSPI0406S00229710	PHOX2B	4.53267e-08	7.79532e-05	2.78261e-05	4.52313e-08	0.99432	1.67572	1.49747	0	1	0			FAM151A
378	MSPI0406S00230742	OCIAD2	4.30116e-05	0.125461	0.3059	7.09165e-05	0.70793	0.930568	1.66727	0	0	1			FAM158A
379	MSPI0406S00231177	RASL11B	3.22367e-11	1	2.41111e-08	0.556564	-0.0460777	3.9802	0.600267	0	1	0			FAM166A
380	MSPI0406S00232069	PAICS	0.000236974	0.00208825	0.000461453	0.00645348	1.1871	2.15428	1.21782	0	1	0			FAM180A
380	MSPI0406S00232069	PPAT	0.000236974	0.00208825	0.000461453	0.00645348	1.1871	2.15428	1.21782	0	1	0			FAM20C
381	MSPI0406S00232413	IGFBP7	4.94214e-11	0.000411974	2.34774e-06	3.62086e-10	1.0491	2.18784	2.01145	0	1	1			FAM45A
382	MSPI0406S00234448	CXCL6	0.000104539	0.000749955	0.000371859	0.00181437	-0.869442	-1.50684	-0.969795	0	1	0			FAM46B
383	MSPI0406S00235546	ARD1B	3.68817e-07	0.00228991	6.04573e-07	0.00513385	0.994465	2.57788	1.04252	0	1	0			FAM63A
384	MSPI0406S00236827	ARHGAP24	9.30223e-08	7.01136e-05	0.565819	1	1.67273	0.805791	0.291799	1	0	0			FAM65A
385	MSPI0406S00237916	GRID2	5.1005e-16	1.94867e-14	2.00719e-09	0	1.64766	1.99504	1.97752	1	1	1			FAM70B
386	MSPI0406S00239368	TACR3	1.01372e-07	4.04335e-08	0.00223763	9.72098e-06	2.08342	1.94828	1.81136	1	1	1			FAM83A
387	MSPI0406S00240123	COL25A1	4.90572e-10	0.163137	0.00125454	0.685126	0.495694	-1.5162	-0.322835	0	1	0			FAM83B
388	MSPI0406S00241077	CAMK2D	6.58624e-16	0	1.73159e-06	2.32554e-05	-1.91549	-1.74619	-1.0879	1	1	0			FAM89B
389	MSPI0406S00242022	ANXA5	3.32055e-08	1	0.50986	0.0022003	-0.162654	0.84973	1.54761	0	0	1			FAM92B
390	MSPI0406S00245299	GAB1	2.96689e-31	0	0.999889	1	3.71536	0.468594	-0.0647978	1	0	0			FARP1
391	MSPI0406S00245533	ABCE1	0.0002458	0.869414	0.481415	0.00493011	-0.352	-0.993721	-1.61436	0	0	1			FASN
391	MSPI0406S00245533	ANAPC10	0.0002458	0.869414	0.481415	0.00493011	-0.352	-0.993721	-1.61436	0	0	1			FBRSL1
392	MSPI0406S00246033	ARHGAP10	0.00077821	0.000670016	0.313851	0.174994	1.5079	1.07939	0.889002	1	0	0			FBXL5
393	MSPI0406S00253066		1.584e-27	0	0	0	3.459	4.11461	3.82114	1	1	1			FBXL6
394	MSPI0406S00253367	ACSL1	5.57597e-24	1	1	4.27828e-14	0.134291	-0.349683	2.89223	0	0	1			FBXO25
395	MSPI0406S00255932		1.43673e-10	9.33627e-05	4.46213e-07	0.967466	1.89474	3.86994	0.374146	1	1	0			FCGR2A
396	MSPI0406S00255933		6.65027e-12	3.28802e-06	4.85622e-12	0.00303203	1.71809	4.23943	1.36304	1	1	0			FCN1
397	MSPI0406S00256782		1.56901e-19	0.0116336	0	4.53751e-05	0.427898	2.35593	0.732155	0	1	0			FCRL6
398	MSPI0406S00257196	TERT	6.59756e-12	1	1.31243e-09	1	0.116099	2.91961	0.12004	0	1	0			FERD3L
399	MSPI0406S00257197	TERT	1.69899e-14	1	1.01579e-10	0.653815	0.0899704	2.15794	-0.252403	0	1	0			FERMT3
400	MSPI0406S00257256	CLPTM1L	4.20769e-13	1.01418e-09	0.00063354	0	1.45261	1.36933	2.14829	0	0	1			FFAR1
401	MSPI0406S00260211		2.72772e-07	1	1	0.000476545	0.0908458	0.259368	1.89276	0	0	1			FGF11
402	MSPI0406S00260919	SEMA5A	8.06305e-11	8.75802e-11	2.6009e-06	2.51434e-10	1.56965	1.78864	1.69689	1	1	1			FKBP5
402	MSPI0406S00260919	SNORD123	8.06305e-11	8.75802e-11	2.6009e-06	2.51434e-10	1.56965	1.78864	1.69689	1	1	1			FKBPL
403	MSPI0406S00260920	SEMA5A	4.94606e-14	5.1495e-12	7.11651e-09	3.40047e-14	1.56585	2.03498	1.96314	1	1	1			FLJ14107
403	MSPI0406S00260920	SNORD123	4.94606e-14	5.1495e-12	7.11651e-09	3.40047e-14	1.56585	2.03498	1.96314	1	1	1			FLJ37453
404	MSPI0406S00261204		3.90703e-09	5.26453e-07	1.04076e-06	1.30229e-08	1.3446	2.13252	1.74707	0	1	1			FLJ42875
405	MSPI0406S00262169		7.51709e-11	3.05227e-05	2.06274e-09	2.40702e-08	0.822382	1.9115	1.25534	0	1	0			FLT3
406	MSPI0406S00264993	CDH6	3.80606e-05	0.02005	0.00100709	0.000253955	-0.790805	-1.73792	-1.29054	0	1	0			FMOD
407	MSPI0406S00265902	TARS	0.000579037	0.00308375	0.424268	0.000279819	-1.14427	-0.820463	-1.55971	0	0	1			FN3KRP
408	MSPI0406S00266268	TTC23L	3.9803e-07	8.72339e-05	0.00312024	1.29906e-07	1.07696	1.45516	1.66796	0	0	1			FNBP4
409	MSPI0406S00266269	TTC23L	0.000120388	0.00585722	1	0.936033	1.68413	0.0289207	0.475346	1	0	0			FNDC3B
410	MSPI0406S00268188	C5orf34	3.49303e-05	0.0891423	3.07266e-05	0.208435	0.735656	2.45656	0.703644	0	1	0			FNDC4
411	MSPI0406S00268612	ISL1	5.55377e-12	1.46604e-11	4.35314e-06	8.20004e-13	1.52012	1.63652	1.799	1	1	1			FOXA3
412	MSPI0406S00268775	ITGA2	3.32485e-13	2.67937e-05	1	0.884336	1.76523	-0.152475	-0.385054	1	0	0			FOXC1
413	MSPI0406S00271050	RGS7BP	2.79541e-07	8.37693e-07	7.28447e-05	0.0112717	1.6637	2.21777	1.0781	1	1	0			FOXL1
414	MSPI0406S00271573	CD180	8.9541e-14	1.14374e-13	1.02486e-07	1.44971e-13	-2.19952	-2.47098	-2.48124	1	1	1			FOXN3
415	MSPI0406S00271978	MRPS36	3.22037e-12	2.02e-06	0.901655	1	1.6255	0.453987	-0.00272657	1	0	0			FSCN3
416	MSPI0406S00273969	COL4A3BP	1.2279e-14	3.17534e-08	7.26647e-07	0	-1.04025	-1.52094	-1.7679	0	1	1			FTCD
416	MSPI0406S00273969	POLK	1.2279e-14	3.17534e-08	7.26647e-07	0	-1.04025	-1.52094	-1.7679	0	1	1			FTSJ2
417	MSPI0406S00275563	ANKRD34B	0.000697994	0.00245886	0.0032115	0.107557	-1.36676	-2.16722	-0.967698	0	1	0			FUT11
418	MSPI0406S00275763	CKMT2	1.08512e-18	0.000528625	0.00267996	0	0.805475	1.21904	2.28693	0	0	1			FUT9
419	MSPI0406S00275764	CKMT2	1.59785e-22	0.00203749	0.000430905	0	0.504629	0.914888	1.68404	0	0	1			FXR2
420	MSPI0406S00276457	COX7C	4.3511e-10	2.36602e-09	2.84916e-08	3.27931e-05	1.53777	2.30676	1.21277	1	1	0			FXYD1
421	MSPI0406S00276770	MEF2C	2.4556e-06	0.804625	1	0.000854046	0.338076	-0.252927	1.57632	0	0	1			FXYD2
422	MSPI0406S00277906	ERAP2	1.9119e-09	8.92407e-10	0.00010096	9.80984e-05	1.74569	1.7541	1.23483	1	1	0			FXYD3
423	MSPI0406S00278718	NUDT12	1.58447e-05	0.727873	0.00123719	1	0.316574	1.92185	-0.22726	0	1	0			FXYD7
424	MSPI0406S00279341	PJA2	4.18429e-16	0	0.373066	9.74988e-10	2.51825	0.706688	2.13372	1	0	1			FYN
425	MSPI0406S00280106	KCNN2	1.01883e-05	5.3538e-05	0.00156228	0.115836	-1.23225	-1.63065	-0.680357	0	1	0			G6e
426	MSPI0406S00281695		1.32232e-23	0.0025427	1.49503e-08	0	1.23218	3.54426	4.16537	0	1	1			G6PD
427	MSPI0406S00281696		9.12659e-32	0.0192753	2.2106e-08	0	0.818553	2.84159	4.06372	0	1	1			GAB1
428	MSPI0406S00282620	ADAMTS19	4.60089e-10	8.51564e-09	0.000146763	0.0399339	-1.67137	-1.8287	-0.777501	1	1	0			GABARAP
429	MSPI0406S00283062	IL3	3.02891e-07	1.31575e-06	0.000420384	1.03507e-07	2.02701	2.4915	2.50378	1	1	1			GABBR2
430	MSPI0406S00283063	IL3	7.37143e-07	1.30428e-07	0.0179915	2.36612e-05	2.50798	2.03365	2.2504	1	0	1			GABRD
431	MSPI0406S00283109	P4HA2	1.54701e-13	1.39285e-06	0.0002237	4.27828e-14	1.10846	1.39641	1.98694	0	0	1			GABRR1
432	MSPI0406S00283374	SHROOM1	2.58836e-08	0.485386	0.097564	5.45436e-06	0.414264	1.13239	1.7276	0	0	1			GAL3ST3
433	MSPI0406S00284244	CDKL3	2.01311e-13	0.0930024	0.933193	1.38312e-09	0.626272	-0.382691	2.10111	0	0	1			GALNT6
433	MSPI0406S00284244	UBE2B	2.01311e-13	0.0930024	0.933193	1.38312e-09	0.626272	-0.382691	2.10111	0	0	1			GALNT8
434	MSPI0406S00285386	SPOCK1	8.86691e-09	0.0221204	0.00457906	0.660065	0.816889	1.60527	-0.387744	0	1	0			GANAB
435	MSPI0406S00286348	SLC23A1	6.60385e-10	1.31639e-06	0.00150399	1.29113e-10	1.47466	1.66672	2.29052	0	1	1			GCAT
436	MSPI0406S00286349	SLC23A1	1.78858e-09	0.00145458	0.00956104	1.70791e-09	0.747781	1.01356	1.51899	0	0	1			GCC1
437	MSPI0406S00286357	LOC389333	5.26936e-12	6.55007e-10	0.000494506	2.94316e-13	1.12514	1.0918	1.52885	0	0	1			GCNT3
437	MSPI0406S00286357	MGC29506	5.26936e-12	6.55007e-10	0.000494506	2.94316e-13	1.12514	1.0918	1.52885	0	0	1			GDPD5
438	MSPI0406S00286368	SPATA24	0.000253782	0.0191616	0.127012	0.000113168	1.154	1.40826	1.97161	0	0	1			GEMIN5
439	MSPI0406S00286985	HBEGF	5.55875e-08	2.59816e-08	0.051956	0.00161727	3.11311	2.10358	2.08592	1	0	1			GFI1
440	MSPI0406S00287342	PCDHB16	1.69915e-06	3.83637e-06	5.18549e-05	0.00267448	-1.72715	-2.4687	-1.33762	1	1	0			GGT5
440	MSPI0406S00287342	PCDHB9	1.69915e-06	3.83637e-06	5.18549e-05	0.00267448	-1.72715	-2.4687	-1.33762	1	1	0			GHRL
441	MSPI0406S00287666	ARAP3	7.06076e-14	7.42557e-11	1	8.31975e-05	1.57338	-0.126366	1.07347	1	0	0			GHSR
442	MSPI0406S00287865	PCDH12	8.86562e-12	2.39878e-06	9.57499e-05	5.4918e-13	1.13235	1.35263	1.75484	0	0	1			GIMAP5
443	MSPI0406S00287891	GNPDA1	7.07538e-08	1.61342e-07	0.000273855	3.90527e-08	2.03293	2.40224	2.44137	1	1	1			GINS2
444	MSPI0406S00288076		1.05913e-15	9.13427e-10	0.0250127	0	1.91775	1.2967	3.11279	1	0	1			GIT2
445	MSPI0406S00289619		0.00196868	0.0340888	0.0049408	0.0110363	0.880606	1.82691	1.15573	0	1	0			GJA4
446	MSPI0406S00290716	TNIP1	2.89713e-07	0.000124722	0.00223054	0.741064	1.66896	2.24653	0.465492	1	1	0			GJA5
447	MSPI0406S00291851	GEMIN5	2.15491e-07	1.09573e-07	3.03841e-05	3.70845e-05	1.24347	1.60429	1.09755	0	1	0			GLYCTK
447	MSPI0406S00291851	MRPL22	2.15491e-07	1.09573e-07	3.03841e-05	3.70845e-05	1.24347	1.60429	1.09755	0	1	0			GLYCTK1
448	MSPI0406S00292307	CYFIP2	4.2118e-10	0.210892	0.00272945	0.0888255	0.626012	1.90462	-0.881913	0	1	0			GMFB
449	MSPI0406S00292308	CYFIP2	1.34694e-11	0.380769	0.930619	1.91934e-07	-0.462723	0.420848	-1.99371	0	0	1			GMPPB
450	MSPI0406S00293336		7.96288e-07	0.027792	1.66963e-05	1	1.24814	3.49828	0.275657	0	1	0			GMPR
451	MSPI0406S00293337		3.98507e-09	4.40029e-07	2.23751e-07	0.0129157	1.84169	3.06884	1.14076	1	1	0			GNAS
452	MSPI0406S00293424	PTTG1	8.75084e-14	3.25829e-11	3.32048e-07	0.018647	1.98676	2.56278	0.87434	1	1	0			GNAS1
452	MSPI0406S00293424	SLU7	8.75084e-14	3.25829e-11	3.32048e-07	0.018647	1.98676	2.56278	0.87434	1	1	0			GNG5
453	MSPI0406S00296224		1.07407e-10	0.00139378	3.00567e-06	2.74041e-09	0.682068	1.53278	1.36628	0	1	0			GNPDA1
454	MSPI0406S00296777		2.30256e-37	0	0.567274	0.479607	2.85348	0.544661	-0.409573	1	0	0			GNPNAT1
455	MSPI0406S00297102	C5orf41	0.000528258	0.688086	0.213473	0.00569383	-0.502249	-1.44898	-1.74255	0	0	1			GNPTG
456	MSPI0406S00297984	MSX2	7.52114e-10	9.06803e-07	0.000767875	6.25133e-11	1.06216	1.2732	1.60583	0	0	1			GNS
457	MSPI0406S00298214	DRD1	1.87884e-05	0.546514	0.000348075	0.0224519	0.293815	1.51928	0.746976	0	1	0			GOLGA2
458	MSPI0406S00298960		3.17534e-11	1.02747e-09	0.0462659	1.33081e-11	1.21448	0.751181	1.53781	0	0	1			GOLT1B
459	MSPI0406S00299848	DBN1	1.27212e-09	8.64738e-11	0.00186828	5.76496e-08	1.83541	1.49893	1.7205	1	0	1			GP9
460	MSPI0406S00300467	AGXT2L2	2.46135e-16	3.96015e-13	3.68434e-09	0	1.70046	2.13712	2.2666	1	1	1			GPAA1
461	MSPI0406S00300966	ZNF354A	6.99608e-20	0.0691799	1	0	0.680688	0.200699	2.88411	0	0	1			GPR108
462	MSPI0406S00301094	ZNF454	5.13166e-08	0.0134342	1.05651e-05	5.97658e-06	-0.69913	-1.87746	-1.34123	0	1	0			GPR114
463	MSPI0406S00303195		2.75019e-10	0.00046278	0.00266019	1	1.10572	1.60476	-0.193722	0	1	0			GPR125
464	MSPI0406S00304184	FOXC1	1.08386e-09	7.29063e-09	1.48723e-05	0.00891969	-1.28872	-1.58539	-0.722556	0	1	0			GPR126
465	MSPI0406S00304577	C6orf195	6.29781e-07	3.72809e-05	3.9016e-05	8.02221e-06	1.19387	1.95313	1.59734	0	1	1			GPR141
466	MSPI0406S00304702		3.95204e-17	0	0.000171909	7.5737e-06	2.29745	1.63341	1.33029	1	1	0			GPR148
467	MSPI0406S00305518	PECI	1.39294e-09	6.24282e-07	0.00010536	2.9386e-10	1.35835	1.74912	1.97264	0	1	1			GPR153
468	MSPI0406S00305922		3.79203e-18	9.59612e-12	1.49027e-12	0	1.11566	1.91787	1.69826	0	1	1			GPR162
469	MSPI0406S00306895	SSR1	4.90118e-08	0.815093	0.00826785	0.000157115	0.298472	1.71001	1.60237	0	1	1			GPR17
470	MSPI0406S00308254	NEDD9	0.000324256	0.00833209	0.000785147	0.00422676	0.946142	1.91075	1.14884	0	1	0			GPR172A
471	MSPI0406S00308858		3.04373e-06	0.00810736	2.88473e-06	0.197069	0.797351	2.09661	0.557725	0	1	0			GPR31
472	MSPI0406S00309297		2.80317e-19	2.77416e-10	2.44539e-11	0	1.47429	2.52461	2.55066	0	1	1			GPRC5C
473	MSPI0406S00310164	MYLIP	3.08297e-14	0	3.49615e-09	1.5239e-12	-1.36413	-1.56924	-1.32888	0	1	0			GPT
474	MSPI0406S00310223	GMPR	1.45556e-06	8.4667e-05	0.00108564	5.20893e-07	1.29061	1.80474	1.84246	0	1	1			GRAMD1B
475	MSPI0406S00310641	RBM24	4.38989e-14	0	1.08325e-06	1.31763e-06	-1.51247	-1.43723	-0.989588	1	0	0			GRASP
476	MSPI0406S00312802	C6orf62	1.41325e-12	1.4335e-12	1.19593e-06	0.000273912	-2.15457	-2.30113	-1.26158	1	1	0			GRB2
477	MSPI0406S00313069	HIST1H2AA	5.59392e-10	0.000166738	2.95744e-06	1.50659e-09	0.896054	1.67588	1.50455	0	1	1			GRID2
477	MSPI0406S00313069	HIST1H2BA	5.59392e-10	0.000166738	2.95744e-06	1.50659e-09	0.896054	1.67588	1.50455	0	1	1			GRIK1
478	MSPI0406S00313248	HIST1H2BE	3.59423e-09	0.0179218	7.2184e-09	0.00230609	0.57435	2.33469	0.810639	0	1	0			GRIK2
479	MSPI0406S00313286	HIST1H3E	3.19825e-09	9.05028e-10	8.45858e-05	0.000293546	1.43894	1.53164	0.997782	0	1	0			GRIN2D
479	MSPI0406S00313286	HIST1H3F	3.19825e-09	9.05028e-10	8.45858e-05	0.000293546	1.43894	1.53164	0.997782	0	1	0			GRINA
480	MSPI0406S00313287	HIST1H3E	2.08867e-13	6.42951e-14	1.17366e-06	2.219e-07	1.93823	1.91177	1.4469	1	1	0			GRM4
480	MSPI0406S00313287	HIST1H3F	2.08867e-13	6.42951e-14	1.17366e-06	2.219e-07	1.93823	1.91177	1.4469	1	1	0			GRM7
481	MSPI0406S00313668	HIST1H2AG	2.24591e-14	1.19752e-12	3.9568e-07	0	1.9517	2.19142	2.50973	1	1	1			GRWD1
481	MSPI0406S00313668	HIST1H2BJ	2.24591e-14	1.19752e-12	3.9568e-07	0	1.9517	2.19142	2.50973	1	1	1			GTF3C3
482	MSPI0406S00314871	DKFZp762B162	5.26128e-06	0.000649403	0.0121702	2.89211e-05	1.01754	1.2623	1.53399	0	0	1			GTPBP1
482	MSPI0406S00314871	IFITM4P	5.26128e-06	0.000649403	0.0121702	2.89211e-05	1.01754	1.2623	1.53399	0	0	1			GTPBP5
483	MSPI0406S00315094	RPP21	7.44841e-05	0.0697135	0.000354259	0.00366465	0.625619	1.72076	1.03437	0	1	0			GUCA1A
484	MSPI0406S00315095	RPP21	5.69112e-05	0.0186024	0.000701679	0.000430896	0.880599	1.93478	1.38908	0	1	0			GUK1
485	MSPI0406S00315325	KIAA1949	2.21173e-08	0.0236545	0.000125241	1.93339e-06	0.815318	2.13382	1.75177	0	1	1			GYPC
485	MSPI0406S00315325	NRM	2.21173e-08	0.0236545	0.000125241	1.93339e-06	0.815318	2.13382	1.75177	0	1	1			H1F0
486	MSPI0406S00315357	MDC1	3.31283e-10	2.51318e-06	0.000931472	0.92116	1.81804	2.19098	0.333581	1	1	0			HABP4
486	MSPI0406S00315357	TUBB	3.31283e-10	2.51318e-06	0.000931472	0.92116	1.81804	2.19098	0.333581	1	1	0			HAMP
486	MSPI0406S00315357	TUBB2C	3.31283e-10	2.51318e-06	0.000931472	0.92116	1.81804	2.19098	0.333581	1	1	0			HAPLN2
487	MSPI0406S00315943	LTA	1.01759e-06	0.444915	0.00370519	0.382599	-0.486297	1.93857	-0.610625	0	1	0			HAPLN3
487	MSPI0406S00315943	TNF	1.01759e-06	0.444915	0.00370519	0.382599	-0.486297	1.93857	-0.610625	0	1	0			HAUS2
488	MSPI0406S00315946	LTA	9.26514e-07	3.79721e-05	0.000646485	4.19623e-07	1.10163	1.52953	1.50041	0	1	1			HBEGF
488	MSPI0406S00315946	TNF	9.26514e-07	3.79721e-05	0.000646485	4.19623e-07	1.10163	1.52953	1.50041	0	1	1			HCCA2
489	MSPI0406S00315948	LTA	1.54595e-14	1.94867e-14	0.000285045	3.44762e-09	1.81735	1.29269	1.43296	1	0	0			HCFC1R1
489	MSPI0406S00315948	TNF	1.54595e-14	1.94867e-14	0.000285045	3.44762e-09	1.81735	1.29269	1.43296	1	0	0			hCG_2018772
490	MSPI0406S00315949	LTA	4.31969e-11	5.7219e-12	0.00125932	1.80187e-08	1.5391	1.19881	1.3617	1	0	0			HCRT
490	MSPI0406S00315949	TNF	4.31969e-11	5.7219e-12	0.00125932	1.80187e-08	1.5391	1.19881	1.3617	1	0	0			HDGF2
491	MSPI0406S00315953	LTB	1.36142e-11	5.71627e-06	0.15077	1	1.73094	1.16806	-0.0557935	1	0	0			HECW1
491	MSPI0406S00315953	TNF	1.36142e-11	5.71627e-06	0.15077	1	1.73094	1.16806	-0.0557935	1	0	0			HINT2
492	MSPI0406S00315957	LST1	7.12115e-17	7.74967e-05	1	0.0575409	1.57704	0.171906	-1.01661	1	0	0			HIST1H2AA
492	MSPI0406S00315957	LTB	7.12115e-17	7.74967e-05	1	0.0575409	1.57704	0.171906	-1.01661	1	0	0			HIST1H2AG
493	MSPI0406S00316110	BAT5	4.93868e-07	7.14388e-08	0.00770708	8.74866e-05	2.15962	1.89183	1.81972	1	1	1			HIST1H2BA
493	MSPI0406S00316110	G6e	4.93868e-07	7.14388e-08	0.00770708	8.74866e-05	2.15962	1.89183	1.81972	1	1	1			HIST1H2BE
493	MSPI0406S00316110	LY6G6D	4.93868e-07	7.14388e-08	0.00770708	8.74866e-05	2.15962	1.89183	1.81972	1	1	1			HIST1H2BJ
494	MSPI0406S00316130	DDAH2	0.000765424	0.00983463	0.00311274	0.00313562	0.958385	1.73924	1.22969	0	1	0			HIST1H3E
495	MSPI0406S00316256	HSPA1B	3.83939e-11	1.19239e-11	1.82613e-05	1.74385e-05	1.55597	1.67554	1.10285	1	1	0			HIST1H3F
496	MSPI0406S00316539		5.84841e-12	0.000238131	3.54482e-08	9.92112e-10	0.683641	1.61495	1.28213	0	1	0			HNRNPR
497	MSPI0406S00316604	ATF6B	1.09503e-11	9.4601e-07	0.000170044	1.45867e-12	1.14893	1.49513	1.92431	0	0	1			HOMER2
497	MSPI0406S00316604	FKBPL	1.09503e-11	9.4601e-07	0.000170044	1.45867e-12	1.14893	1.49513	1.92431	0	0	1			HOMEZ
498	MSPI0406S00316605	ATF6B	1.50637e-14	3.78767e-06	1.64628e-06	4.27828e-14	1.20359	2.01014	2.35079	0	1	1			HOXB3
498	MSPI0406S00316605	FKBPL	1.50637e-14	3.78767e-06	1.64628e-06	4.27828e-14	1.20359	2.01014	2.35079	0	1	1			HOXB4
499	MSPI0406S00316637	PPT2	9.60126e-09	6.22961e-05	2.76484e-05	1.97499e-08	0.974412	1.68961	1.55584	0	1	1			HOXB5
499	MSPI0406S00316637	PRRT1	9.60126e-09	6.22961e-05	2.76484e-05	1.97499e-08	0.974412	1.68961	1.55584	0	1	1			HOXB6
500	MSPI0406S00316921	TAP2	1.12243e-11	4.99258e-12	3.91574e-05	1.20393e-11	1.5497	1.46791	1.69033	1	0	1			HOXC13
501	MSPI0406S00316938	PSMB9	3.25442e-19	1.10038e-05	0.764839	0.0619593	1.60491	-0.576929	-0.926714	1	0	0			HOXD3
501	MSPI0406S00316938	TAP1	3.25442e-19	1.10038e-05	0.764839	0.0619593	1.60491	-0.576929	-0.926714	1	0	0			HPCAL1
502	MSPI0406S00317086	HSD17B8	3.40557e-12	7.26663e-09	7.04647e-06	1.20864e-12	1.77147	2.61841	2.71203	1	1	1			HPS4
502	MSPI0406S00317086	RXRB	3.40557e-12	7.26663e-09	7.04647e-06	1.20864e-12	1.77147	2.61841	2.71203	1	1	1			HSBP1
502	MSPI0406S00317086	SLC39A7	3.40557e-12	7.26663e-09	7.04647e-06	1.20864e-12	1.77147	2.61841	2.71203	1	1	1			HSD11B2
503	MSPI0406S00317209	DAXX	2.60622e-10	0.928834	0.024456	0.00200119	0.351059	-2.18593	-1.96552	0	0	1			HSD17B8
504	MSPI0406S00317325	CUTA	6.03124e-12	2.15212e-12	2.39281e-05	5.69012e-12	1.63135	1.62042	1.7928	1	1	1			HSPA1B
504	MSPI0406S00317325	SYNGAP1	6.03124e-12	2.15212e-12	2.39281e-05	5.69012e-12	1.63135	1.62042	1.7928	1	1	1			HSPA8
505	MSPI0406S00317627		4.30495e-15	5.15703e-05	0.0176538	0.28295	1.88442	1.97363	-0.821135	1	0	0			HSPB11
506	MSPI0406S00317675	IP6K3	1.76203e-09	0.0440474	0.0127133	8.57343e-08	0.687783	1.34015	1.83852	0	0	1			HSPB7
507	MSPI0406S00318059	GRM4	2.10928e-05	0.0321735	0.0165812	3.04914e-05	0.771192	1.38771	1.50127	0	0	1			HSPG2
508	MSPI0406S00318194	C6orf1	2.44841e-08	0.000160758	0.187439	5.73554e-09	1.25124	0.884721	1.99714	0	0	1			HTR2C
509	MSPI0406S00318806	TCP11	4.61014e-07	0.327801	1	2.09389e-05	0.712068	-0.144649	2.3574	0	0	1			HTRA2
510	MSPI0406S00318883	DEF6	1.43714e-07	0.253179	3.90644e-07	0.661944	0.505339	2.57802	0.381972	0	1	0			ICAM2
511	MSPI0406S00318914	PPARD	4.98027e-05	0.00645609	0.494532	2.04237e-05	1.14481	0.813931	1.88786	0	0	1			ICAM4
512	MSPI0406S00319209	C6orf81	0.00146545	0.340522	0.00210196	0.149702	0.420178	1.55095	0.62289	0	1	0			IDH2
512	MSPI0406S00319209	FKBP5	0.00146545	0.340522	0.00210196	0.149702	0.420178	1.55095	0.62289	0	1	0			IFITM1
513	MSPI0406S00319391	MAPK14	1.00022e-10	2.02639e-05	0.000326198	2.13977e-11	1.05975	1.43563	1.76812	0	0	1			IFITM2
513	MSPI0406S00319391	SLC26A8	1.00022e-10	2.02639e-05	0.000326198	2.13977e-11	1.05975	1.43563	1.76812	0	0	1			IFITM4P
514	MSPI0406S00319698	STK38	1.5785e-07	0.00124619	3.30584e-05	0.922502	1.02331	2.06937	0.261366	0	1	0			IFNGR2
515	MSPI0406S00319805	CDKN1A	3.10968e-13	1.76243e-13	0.00130848	1.20393e-11	1.61778	1.14518	1.7324	1	0	1			IFT172
516	MSPI0406S00321781	TREML1	0.000761725	0.0166692	0.000835602	0.147316	0.716936	1.54087	0.583422	0	1	0			IGF2BP1
517	MSPI0406S00322273	CCND3	1.0434e-06	0.000234168	5.00194e-05	2.64668e-06	1.43346	2.47071	1.93998	0	1	1			IGF2BP2
518	MSPI0406S00322491	GUCA1A	2.03372e-09	4.16619e-08	0.00143877	2.12554e-10	1.42914	1.41402	1.87464	0	0	1			IGFBP7
519	MSPI0406S00323575	POLH	3.25309e-25	2.83185e-11	0.181246	0.261457	1.69063	0.739107	-0.464903	1	0	0			IGLL1
519	MSPI0406S00323575	XPO5	3.25309e-25	2.83185e-11	0.181246	0.261457	1.69063	0.739107	-0.464903	1	0	0			IKBKG
520	MSPI0406S00325248	TFAP2B	3.27683e-08	3.20629e-08	0.0616471	1.49284e-05	1.51347	0.94595	1.27656	1	0	0			IL11
521	MSPI0406S00326033	FAM83B	1.83202e-05	0.0460438	0.00264783	0.00030231	-0.850609	-1.92979	-1.63563	0	1	1			IL13RA1
522	MSPI0406S00328009	KHDC1	3.3014e-07	0.268923	0.00992068	0.379279	0.600602	1.76658	-0.620338	0	1	0			IL17RE
523	MSPI0406S00328208	EEF1A1	9.91773e-17	8.55637e-11	4.13566e-07	0	0.970631	1.217	1.55327	0	0	1			IL1R2
524	MSPI0406S00328592	SENP6	7.78612e-13	0.0237514	1	2.42484e-10	0.853081	-0.0365278	2.41544	0	0	1			IL22RA1
525	MSPI0406S00329603	ME1	0.00366787	0.315566	0.00661229	1	-0.571771	-1.86396	-0.280418	0	1	0			IL25
526	MSPI0406S00330716	GABRR1	0.0013626	0.0015019	0.899182	0.156644	1.51301	0.607129	0.972634	1	0	0			IL27
527	MSPI0406S00331617	FUT9	5.5922e-07	0.000986238	3.9839e-05	2.32009e-06	-0.90018	-1.78131	-1.39947	0	1	0			IL2RA
528	MSPI0406S00332322	GRIK2	4.67228e-13	3.5429e-13	2.40673e-07	5.55319e-13	1.72614	1.95275	1.89999	1	1	1			IL3
529	MSPI0406S00334940	TRAF3IP2	4.5381e-17	0	3.15608e-05	3.25484e-12	1.97165	1.4167	1.68036	1	0	1			IL4I1
530	MSPI0406S00335042	FYN	3.64823e-18	2.63273e-11	0.919754	1	1.83768	0.389857	0.191685	1	0	0			IL6R
531	MSPI0406S00339056	MAP7	1.53816e-18	0.208958	0.202216	2.01185e-06	-0.770367	-1.29839	2.47499	0	0	1			IMMP2L
532	MSPI0406S00340362	GPR126	8.09891e-06	2.48412e-05	0.0116042	0.146908	1.77711	1.91087	0.907495	1	0	0			IMMT
533	MSPI0406S00342068	NUP43	2.20308e-22	1.20833e-10	1.38605e-12	0	1.08008	1.94084	2.00189	0	1	1			INF2
533	MSPI0406S00342068	PCMT1	2.20308e-22	1.20833e-10	1.38605e-12	0	1.08008	1.94084	2.00189	0	1	1			ING4
534	MSPI0406S00342069	NUP43	1.05483e-16	5.46968e-10	1.69496e-08	0	1.12777	1.63943	1.84945	0	1	1			INO80
534	MSPI0406S00342069	PCMT1	1.05483e-16	5.46968e-10	1.69496e-08	0	1.12777	1.63943	1.84945	0	1	1			INPP5E
535	MSPI0406S00342144	RAET1E	7.31778e-13	9.37042e-11	1	5.47206e-06	2.07113	0.0362871	1.62355	1	0	1			INPP5J
536	MSPI0406S00342185	ULBP1	2.08674e-09	3.20414e-08	0.000213636	0.0616663	-1.58725	-1.71192	-0.706639	1	1	0			INSIG1
537	MSPI0406S00343331	SYNE1	4.72479e-09	0.000202178	0.000519563	1	1.19275	1.907	0.113243	0	1	0			INTS5
538	MSPI0406S00343332	SYNE1	5.42648e-09	1.51704e-07	1.58475e-07	0.00128883	1.16841	1.87216	0.845986	0	1	0			IP6K3
539	MSPI0406S00345101	SYNJ2	2.16008e-14	2.09025e-13	0.000123248	0.000402087	2.05861	1.81996	1.10055	1	1	0			IQCC
540	MSPI0406S00345568	DYNLT1	1.92054e-14	0.0256593	1	3.22935e-11	0.938069	0.119192	2.88687	0	0	1			IQSEC1
540	MSPI0406S00345568	SYTL3	1.92054e-14	0.0256593	1	3.22935e-11	0.938069	0.119192	2.88687	0	0	1			IRGQ
541	MSPI0406S00348562	SFT2D1	0.000662905	0.00022653	0.331418	0.0166519	2.31145	1.51187	1.87573	1	0	0			IRS1
542	MSPI0406S00349046		2.45774e-21	4.28288e-13	0	0	0.882855	1.56344	1.42612	0	1	0			ISG20L2
543	MSPI0406S00349065	RNASET2	7.20656e-10	8.27067e-10	2.33203e-06	2.10654e-09	1.48169	1.86947	1.62961	0	1	1			ISL1
544	MSPI0406S00349144	CCR6	1.82819e-13	0.755663	0.038977	7.25703e-09	-0.226908	-0.987616	-1.65203	0	0	1			ISOC2
545	MSPI0406S00349145	CCR6	7.49873e-20	0.0410862	0.48385	3.6913e-06	1.07464	0.964195	-2.41753	0	0	1			ITGA2
546	MSPI0406S00349171	GPR31	1.39341e-12	2.09025e-13	0.00875256	4.72223e-10	1.94224	1.19275	1.79127	1	0	1			ITGAD
547	MSPI0406S00350759		3.60241e-12	4.31497e-09	6.22893e-08	1.52693e-12	1.06268	1.64115	1.47508	0	1	0			ITGAE
548	MSPI0406S00351182	DLL1	0.000181407	0.00287507	0.00606944	0.519872	-1.55303	-2.39893	-0.691218	1	1	0			ITIH3
549	MSPI0406S00352381	FAM20C	2.26511e-08	1	2.33374e-06	0.247991	0.122355	2.49871	0.610122	0	1	0			ITIH4
550	MSPI0406S00352433		3.30847e-12	0.0393104	0.001238	5.09785e-10	0.570508	1.31898	1.69897	0	0	1			ITM2C
551	MSPI0406S00353767		4.71291e-19	0.270049	0	2.15078e-07	0.366251	2.94009	1.36746	0	1	0			ITPRIP
552	MSPI0406S00353768		5.13949e-15	0.203599	2.09025e-12	0.000162964	0.268471	1.84839	0.680695	0	1	0			JMJD7
553	MSPI0406S00354668	FTSJ2	2.65982e-10	1.24691e-09	5.18671e-07	5.99197e-09	1.92864	2.71929	2.10221	1	1	1			JMJD7-PLA2G4B
553	MSPI0406S00354668	NUDT1	2.65982e-10	1.24691e-09	5.18671e-07	5.99197e-09	1.92864	2.71929	2.10221	1	1	1			JOSD1
554	MSPI0406S00354846		8.20047e-12	3.62048e-05	1.82744e-06	2.30687e-11	0.864965	1.52349	1.52813	0	1	1			JSRP1
555	MSPI0406S00355037	LFNG	9.32217e-17	2.02671e-08	0.000303505	0	1.29204	1.43636	2.39449	0	0	1			JUB
556	MSPI0406S00355038	LFNG	7.92962e-22	3.67434e-09	3.97076e-06	0	0.935324	1.21758	1.93502	0	0	1			KAL1
557	MSPI0406S00355173		1.34371e-12	0.960238	4.22869e-06	1.83947e-05	0.147596	1.80311	1.15511	0	1	0			KCNAB2
558	MSPI0406S00355215	TTYH3	5.40013e-14	7.81609e-14	3.84373e-08	2.02571e-06	-1.624	-1.81744	-1.09909	1	1	0			KCNAB3
559	MSPI0406S00355370		3.96172e-15	1.14431e-05	2.3027e-05	2.65428e-13	0.831095	1.35698	1.71358	0	0	1			KCNH4
560	MSPI0406S00357748		8.9263e-09	0.0530505	1.68664e-06	2.68762e-05	0.574688	1.95534	1.23366	0	1	0			KCNJ3
561	MSPI0406S00357749		1.79104e-05	0.651731	0.000825946	0.0179092	0.303178	1.67481	0.90051	0	1	0			KCNJ5
562	MSPI0406S00358656	RAC1	2.83516e-08	1.87164e-06	0.0274278	2.83626e-09	1.07731	0.934463	1.52295	0	0	1			KCNK18
563	MSPI0406S00358901	C7orf26	3.4156e-08	0.00450448	0.0295157	4.01381e-08	1.06932	1.42879	2.19479	0	0	1			KCNK3
564	MSPI0406S00359015		6.31751e-05	5.66803e-05	0.00523923	0.0332612	2.48568	3.03082	1.70191	1	1	0			KCNN2
565	MSPI0406S00359816	NDUFA4	1.42448e-13	1.92885e-13	0.00163836	4.78854e-05	2.29797	1.67129	1.41443	1	1	0			KCNV1
566	MSPI0406S00359912		1.457e-18	0.555712	0.00163836	2.35976e-12	0.29932	1.40809	2.10124	0	0	1			KCTD11
567	MSPI0406S00360459	MEOX2	4.63194e-10	3.95422e-08	3.76378e-07	7.2756e-10	1.36519	1.94962	1.66237	0	1	1			KDELR1
568	MSPI0406S00360542	SOSTDC1	3.29129e-16	2.18495e-12	4.27657e-11	0	1.02288	1.54344	1.4199	0	1	0			KDM2A
569	MSPI0406S00360967	FERD3L	1.50421e-12	9.62609e-10	9.5179e-07	4.40119e-13	1.2952	1.68	1.81425	0	1	1			KDM4B
570	MSPI0406S00361219	SP8	1.51481e-11	1.24518e-12	3.57138e-07	4.72431e-09	-1.7082	-1.91927	-1.57465	1	1	1			KHDC1
571	MSPI0406S00364500	AQP1	9.54821e-08	0.262452	2.0317e-05	0.000576162	0.476392	2.08579	1.23576	0	1	0			KIAA0232
572	MSPI0406S00365314		1.5576e-26	5.19959e-12	1	0.382606	3.33534	0.358079	-0.765605	1	0	0			KIAA0323
573	MSPI0406S00366346	GPR141	1.35035e-16	3.28868e-09	4.00606e-09	0	0.878967	1.42708	1.50064	0	0	1			KIAA0907
574	MSPI0406S00366757	LOC646999	1.33737e-08	3.39732e-08	0.810626	0.000613686	1.64272	0.446773	1.24679	1	0	0			KIAA1267
575	MSPI0406S00367622	HECW1	0.00075798	0.0105075	0.00190613	0.00969819	1.53583	3.05053	1.78045	0	1	1			KIAA1609
576	MSPI0406S00367897		1.35425e-13	0.00821084	3.10863e-09	3.08137e-09	0.524111	1.76998	1.23279	0	1	0			KIAA1875
577	MSPI0406S00367898		4.05651e-15	0.00392111	1.30673e-10	3.26062e-10	0.664248	2.24804	1.52135	0	1	1			KIAA1949
578	MSPI0406S00368100	POLM	2.19186e-07	0.135633	2.67332e-07	0.249533	0.45967	2.01441	0.456622	0	1	0			KIAA2013
579	MSPI0406S00368119	AEBP1	1.56547e-08	0.000133445	4.83807e-05	3.23251e-08	1.00916	1.80369	1.63126	0	1	1			KIF5C
580	MSPI0406S00368792	CCM2	0.00135212	0.010677	0.0082488	0.44214	-1.27324	-2.12771	-0.691893	0	1	0			KIF7
581	MSPI0406S00370463	LOC100130988	2.15871e-08	3.43059e-06	0.0205745	5.38345e-09	1.21705	1.09532	1.73336	0	0	1			KLC1
581	MSPI0406S00370463	ZPBP	2.15871e-08	3.43059e-06	0.0205745	5.38345e-09	1.21705	1.09532	1.73336	0	0	1			KLC3
582	MSPI0406S00371490	VSTM2A	6.27189e-06	0.000660941	4.59146e-05	0.000242552	-1.05691	-2.12441	-1.29238	0	1	0			KLF13
583	MSPI0406S00372326	CHCHD2	0.000130602	0.0189466	0.0324345	7.64612e-05	-0.912674	-1.39915	-1.57937	0	0	1			KLF6
584	MSPI0406S00379166	CLDN4	1.13359e-06	0.00850139	0.0223285	9.5473e-07	1.0487	1.54297	2.03824	0	0	1			KLHDC5
585	MSPI0406S00379465	LIMK1	1.30848e-05	0.00905778	0.0318358	8.27814e-06	0.864081	1.23096	1.55881	0	0	1			KLHDC7A
586	MSPI0406S00379603	LAT2	4.37092e-18	0	0.000760509	3.61448e-06	1.90362	1.18781	1.10278	1	0	0			KLHL17
587	MSPI0406S00383362	CACNA2D1	0.00639124	0.0952598	0.0062529	0.0689031	-0.646874	-1.52208	-0.789953	0	1	0			KNDC1
588	MSPI0406S00384704	TFPI2	1.30677e-05	0.000199009	0.000659181	0.175949	-1.08594	-1.65039	-0.586062	0	1	0			KNTC1
589	MSPI0406S00384705	TFPI2	1.90476e-08	0.426192	0.00140857	0.620577	0.39276	-1.62602	-0.378061	0	1	0			KPTN
590	MSPI0406S00385773		2.14121e-12	0.0260319	3.83174e-07	1.10151e-08	0.652793	2.17649	1.68019	0	1	1			KREMEN2
591	MSPI0406S00386256	TRRAP	5.44736e-07	0.00626849	3.57138e-07	0.0753012	0.607379	1.6857	0.502806	0	1	0			KRT16
592	MSPI0406S00387157	MBLAC1	2.53812e-06	1	0.00218326	0.021565	0.114477	1.58429	0.88018	0	1	0			KRT6A
592	MSPI0406S00387157	TAF6	2.53812e-06	1	0.00218326	0.021565	0.114477	1.58429	0.88018	0	1	0			KRT78
593	MSPI0406S00387258	PVRIG	1.88131e-13	1.01439e-12	1.07836e-06	0.00019148	1.97933	2.0929	1.15387	1	1	0			KRT80
594	MSPI0406S00387480	C7orf61	5.31427e-08	2.45386e-08	0.0141637	0.00343499	1.62461	1.29812	1.03412	1	0	0			KRT81
595	MSPI0406S00387637	PCOLCE	5.75552e-13	0.426192	9.88573e-06	1.2282e-07	0.309	1.71796	1.39157	0	1	0			KRTAP10-6
596	MSPI0406S00387695	TFR2	3.21459e-17	1	0.0334195	2.94057e-09	0.0339035	1.32655	2.25303	0	0	1			KRTAP5-5
597	MSPI0406S00388418	PLOD3	2.00259e-05	0.000353237	0.00312024	0.396978	-1.84533	-2.51324	-0.776153	1	1	0			LAD1
597	MSPI0406S00388418	ZNHIT1	2.00259e-05	0.000353237	0.00312024	0.396978	-1.84533	-2.51324	-0.776153	1	1	0			LAG3
598	MSPI0406S00388764		0.000656372	0.0966763	0.000729831	0.0425697	0.731268	2.06211	0.965846	0	1	0			LAIR1
599	MSPI0406S00388880	MYL10	1.85025e-12	1.52787e-05	9.4734e-07	3.20289e-12	0.893038	1.62257	1.62406	0	1	1			LARGE
600	MSPI0406S00389823	ALKBH4	0.000200843	0.00689904	0.00689059	0.755161	1.04507	1.73518	0.390629	0	1	0			LAT2
600	MSPI0406S00389823	LRWD1	0.000200843	0.00689904	0.00689059	0.755161	1.04507	1.73518	0.390629	0	1	0			LBX2
601	MSPI0406S00390854	PUS7	0.00106833	0.000912278	0.199255	0.00165922	1.53659	1.25118	1.68587	1	0	1			LCE3A
602	MSPI0406S00391172	SYPL1	6.99627e-10	5.67076e-05	7.75124e-05	3.98918e-10	-0.90963	-1.47881	-1.58824	0	0	1			LCE3E
603	MSPI0406S00391221	NAMPT	2.87185e-13	3.57126e-10	4.3755e-07	4.27828e-14	-1.63713	-2.116	-2.3276	1	1	1			LEPREL2
604	MSPI0406S00391971	IMMP2L	2.49708e-05	1	0.000662224	1	-0.02347	1.70314	-0.0154839	0	1	0			LEPROTL1
605	MSPI0406S00393810	ARF5	5.53008e-11	6.00367e-07	0.000911822	5.33173e-12	1.06454	1.25557	1.70985	0	0	1			LFNG
605	MSPI0406S00393810	FSCN3	5.53008e-11	6.00367e-07	0.000911822	5.33173e-12	1.06454	1.25557	1.70985	0	0	1			LGALS3BP
605	MSPI0406S00393810	GCC1	5.53008e-11	6.00367e-07	0.000911822	5.33173e-12	1.06454	1.25557	1.70985	0	0	1			LGI3
606	MSPI0406S00394532		1.08101e-10	0.000432667	1.55194e-05	6.43856e-10	0.933584	1.7626	1.78077	0	1	1			LGI4
607	MSPI0406S00394759	AHCYL2	5.66849e-11	5.546e-09	2.91173e-06	8.25368e-12	1.12975	1.46047	1.50856	0	0	1			LIF
608	MSPI0406S00395457	CPA1	8.14661e-16	2.68754e-07	4.0565e-11	1.44971e-13	0.840829	1.78683	1.46003	0	1	0			LIG1
609	MSPI0406S00395658		3.86657e-07	0.0072537	1	1	1.61491	-0.0284688	-0.314869	1	0	0			LILRB2
610	MSPI0406S00396920	CALD1	4.72939e-07	1	0.000273273	0.585012	0.161744	2.22716	-0.479809	0	1	0			LILRB4
611	MSPI0406S00397149	NUP205	3.66589e-11	2.32754e-07	0.0910619	0.627416	1.63288	1.04463	0.383758	1	0	0			LIM2
612	MSPI0406S00397150	NUP205	1.16132e-05	2.31805e-06	0.0671515	0.00238225	1.84624	1.40995	1.46234	1	0	0			LIMD1
613	MSPI0406S00397253	FAM180A	3.40036e-12	3.92671e-07	1.03235e-11	1.29367e-08	0.956892	2.06716	1.20108	0	1	0			LIMK1
614	MSPI0406S00398762		8.20301e-14	9.70139e-06	8.37902e-08	1.92134e-12	0.85111	1.6736	1.60299	0	1	1			LIMS2
615	MSPI0406S00399960	OR6V1	7.23985e-16	1	1	1.26471e-09	0.145497	0.2523	1.94958	0	0	1			LINGO4
616	MSPI0406S00402006	SSPO	4.66068e-13	4.34798e-07	0.00225803	4.27828e-14	0.955199	1.00243	1.67328	0	0	1			LMNA
616	MSPI0406S00402006	ZNF467	4.66068e-13	4.34798e-07	0.00225803	4.27828e-14	0.955199	1.00243	1.67328	0	0	1			LMO2
617	MSPI0406S00402109	ZNF862	9.25039e-15	6.36938e-10	1.48821e-05	0	2.48002	2.76839	3.80552	1	1	1			LOC100126784
618	MSPI0406S00402128		7.23591e-09	4.59117e-08	1.06384e-06	0.000980138	2.50369	3.55959	1.76362	1	1	1			LOC100128164
619	MSPI0406S00402138	ATP6V0E2	2.0956e-13	4.37459e-09	2.55831e-08	0.146724	1.80126	2.80991	0.658226	1	1	0			LOC100128788
619	MSPI0406S00402138	LOC401431	2.0956e-13	4.37459e-09	2.55831e-08	0.146724	1.80126	2.80991	0.658226	1	1	0			LOC100129534
620	MSPI0406S00402139	ATP6V0E2	1.93543e-10	1.32999e-05	0.000125523	1	1.34658	2.1048	0.206653	0	1	0			LOC100129637
620	MSPI0406S00402139	LOC401431	1.93543e-10	1.32999e-05	0.000125523	1	1.34658	2.1048	0.206653	0	1	0			LOC100130988
621	MSPI0406S00402531	GIMAP5	3.3898e-16	1.54853e-09	1	0.72487	1.97093	-0.179969	0.367177	1	0	0			LOC100190938
622	MSPI0406S00402984	ASB10	3.35271e-06	0.0103626	0.000605464	1.38384e-05	1.06949	2.2296	1.87362	0	1	1			LOC100302650
623	MSPI0406S00405299	INSIG1	1.0799e-07	0.00149185	1.31272e-06	1.04779e-05	1.09941	2.52408	1.63884	0	1	1			LOC113230
624	MSPI0406S00406744	DNAJB6	3.95458e-09	1.17893e-07	0.448485	0.0866174	2.0181	0.836143	0.913935	1	0	0			LOC146880
625	MSPI0406S00406947		1.25609e-11	0.0104991	3.58915e-11	0.000145868	0.432128	1.6762	0.681916	0	1	0			LOC150381
626	MSPI0406S00407916	PTPRN2	2.21699e-12	0.00289188	4.33414e-07	3.51222e-10	0.744436	1.91398	1.66852	0	1	1			LOC151534
627	MSPI0406S00407917	PTPRN2	1.28393e-10	0.024916	0.00602864	4.02024e-09	0.66831	1.30536	1.77629	0	0	1			LOC339524
628	MSPI0406S00408256		0.000397117	0.306681	0.000450264	0.287348	0.409768	1.6205	0.489531	0	1	0			LOC389333
629	MSPI0406S00408946		4.61512e-12	4.35365e-13	0.00445119	1.37761e-08	1.53371	1.01141	1.30864	1	0	0			LOC401431
630	MSPI0406S00409132	FBXO25	2.5746e-05	0.00200796	0.00562032	1.12011e-05	1.1206	1.65572	1.68088	0	1	1			LOC646999
631	MSPI0406S00413619	PPP1R3B	3.29871e-09	0.000325904	0.555529	4.36476e-09	1.57028	0.843499	2.87222	1	0	1			LOC650368
632	MSPI0406S00414361	C8orf74	4.22681e-07	6.07622e-05	0.0605068	5.93607e-08	1.21356	1.0915	1.82021	0	0	1			LOC652276
633	MSPI0406S00414664		0.00168561	0.000567966	0.359461	0.0125745	1.66393	1.12354	1.46864	1	0	0			LOC80054
634	MSPI0406S00414669		6.28324e-11	3.20782e-09	8.74514e-05	5.36544e-12	-1.55217	-1.69135	-2.02864	1	1	1			LOH12CR1
635	MSPI0406S00414851	BLK	4.24413e-11	1	4.35161e-08	1	-0.0561818	1.92385	0.105502	0	1	0			LOH12CR2
636	MSPI0406S00415062		4.69628e-06	0.000121939	0.000574704	2.73738e-06	1.38911	2.07598	1.88855	0	1	1			LOXL1
637	MSPI0406S00415073	NEIL2	3.02395e-14	0	1.35087e-06	7.43502e-12	1.6995	1.55258	1.59128	1	1	1			LOXL4
638	MSPI0406S00418248	REEP4	5.16575e-16	0	1.96161e-05	1.9029e-12	1.78711	1.34936	1.56858	1	0	1			LPAR2
639	MSPI0406S00418267	BMP1	2.80964e-07	0.0185074	0.0873054	4.25432e-07	0.776438	1.02332	1.69641	0	0	1			LPAR5
639	MSPI0406S00418267	LGI3	2.80964e-07	0.0185074	0.0873054	4.25432e-07	0.776438	1.02332	1.69641	0	0	1			LPIN1
639	MSPI0406S00418267	SFTPC	2.80964e-07	0.0185074	0.0873054	4.25432e-07	0.776438	1.02332	1.69641	0	0	1			LPIN2
640	MSPI0406S00418578	SORBS3	2.24924e-14	4.03722e-12	0.304029	0.00285355	1.84956	0.649504	0.918805	1	0	0			LRFN5
641	MSPI0406S00418704	FLJ14107	3.51059e-13	5.43738e-05	0.000122245	0.914939	2.16539	3.35512	-0.460867	1	1	0			LRP5
642	MSPI0406S00419237	R3HCC1	3.06487e-07	8.7783e-07	0.00548157	0.0495771	1.87426	1.87975	1.00288	1	1	0			LRP5L
643	MSPI0406S00420551	PTK2B	4.87753e-08	7.18616e-07	0.0013872	0.183271	-1.52521	-1.6413	-0.6169	1	1	0			LRRC15
643	MSPI0406S00420551	TRIM35	4.87753e-08	7.18616e-07	0.0013872	0.183271	-1.52521	-1.6413	-0.6169	1	1	0			LRRC16B
644	MSPI0406S00421319	EXTL3	3.8021e-10	0.389201	3.50523e-09	0.488093	0.23528	1.65098	0.249899	0	1	0			LRRC3
645	MSPI0406S00421320	EXTL3	6.54463e-18	0.0582421	0	0.217386	0.576485	3.66252	0.504512	0	1	0			LRRC42
646	MSPI0406S00421893	LEPROTL1	7.23317e-12	3.53405e-12	1.36412e-07	6.04688e-08	1.55494	1.86516	1.30447	1	1	0			LRRC46
647	MSPI0406S00422608		0.000225134	0.0101952	0.000980589	0.380802	0.759925	1.5103	0.432691	0	1	0			LRRC55
648	MSPI0406S00425296	NKX6-3	4.99038e-05	1	0.000380843	0.718086	0.124494	1.68103	0.320982	0	1	0			LRRC57
649	MSPI0406S00425977	C8orf40	3.62668e-08	0.10672	1	1.93664e-06	0.799301	0.0482254	2.17936	0	0	1			LRRFIP1
649	MSPI0406S00425977	SLC20A2	3.62668e-08	0.10672	1	1.93664e-06	0.799301	0.0482254	2.17936	0	0	1			LRRTM4
650	MSPI0406S00433468		8.67383e-07	6.38274e-07	0.000247422	0.00502181	1.51116	1.86059	1.06123	1	1	0			LRWD1
651	MSPI0406S00434163		2.53462e-11	0.000154139	1.20136e-06	2.57234e-10	0.82251	1.66055	1.54482	0	1	1			LSM14B
652	MSPI0406S00434570	RALYL	0.000160183	0.000302565	0.000854335	0.00152544	-1.13101	-1.70163	-1.15123	0	1	0			LSM7
653	MSPI0406S00434717	CA2	3.03862e-05	0.117334	0.24014	0.000135099	0.814737	1.0757	1.77271	0	0	1			LSP1
654	MSPI0406S00435101	DCAF4L2	1.55435e-06	0.00111037	1.43091e-05	4.66211e-05	1.16245	2.45608	1.61397	0	1	1			LSS
655	MSPI0406S00435102	DCAF4L2	1.14858e-07	5.73089e-05	7.18373e-07	7.4598e-06	0.816331	1.61993	1.04094	0	1	0			LST1
656	MSPI0406S00436582	MTERFD1	1.59504e-11	2.28362e-08	0.0311058	0.502827	1.52153	1.10903	0.391832	1	0	0			LTA
656	MSPI0406S00436582	PTDSS1	1.59504e-11	2.28362e-08	0.0311058	0.502827	1.52153	1.10903	0.391832	1	0	0			LTB
657	MSPI0406S00436634		3.33321e-13	2.78927e-13	4.55428e-09	6.57756e-12	2.24204	2.77426	2.30653	1	1	1			LTB4R
658	MSPI0406S00436635		1.62895e-15	0	2.0839e-07	9.46705e-07	2.90826	2.85396	1.88292	1	1	1			LTB4R2
659	MSPI0406S00437601	RGS22	1.25776e-09	0.00686524	0.0714112	5.93087e-09	-0.789007	-0.967102	-1.81665	0	0	1			LY6G6D
660	MSPI0406S00438807	BAALC	0.00015876	0.00273169	0.00494241	0.00011104	1.13537	1.72298	1.53303	0	1	1			MACROD2
660	MSPI0406S00438807	C8orf56	0.00015876	0.00273169	0.00494241	0.00011104	1.13537	1.72298	1.53303	0	1	1			MAD2L2
661	MSPI0406S00439649	KCNV1	4.36298e-08	5.48613e-09	0.0176293	1.14747e-06	1.55585	1.15473	1.45716	1	0	0			MAF1
662	MSPI0406S00440753	NOV	2.73784e-10	2.87923e-05	0.0530519	1	1.8378	1.60253	0.000733202	1	0	0			MAFA
663	MSPI0406S00441148	SNTB1	5.39726e-11	4.27993e-09	0.000277427	0.0969378	-2.16801	-2.22739	-0.853663	1	1	0			MAG
664	MSPI0406S00441696	FAM83A	4.00865e-05	0.542015	0.00154963	0.0120901	0.358901	1.67255	0.976136	0	1	0			MAGEC2
665	MSPI0406S00442133		6.86138e-11	0.000428711	0.438742	2.00165e-07	0.994678	-0.612696	1.63107	0	0	1			MAL
666	MSPI0406S00442177	TMEM65	3.99349e-11	2.09384e-10	3.8629e-05	0.00740838	-1.86087	-1.9337	-0.95312	1	1	0			MAN2B1
667	MSPI0406S00443818	ASAP1	9.65427e-06	1.37749e-05	0.000518601	0.00554985	1.36117	1.81861	1.04005	0	1	0			MAP1A
668	MSPI0406S00444070	EFR3A	3.49987e-10	0.000437374	1	1	1.63747	-0.456764	-0.11905	1	0	0			MAP2K7
669	MSPI0406S00446842	CHRAC1	7.43354e-13	0.00013347	0.00348514	0.756756	1.28804	1.64896	-0.347417	0	1	0			MAP3K7IP1
670	MSPI0406S00446999	EIF2C2	4.14808e-10	1.56932e-05	0.493602	2.29092e-10	1.91476	0.931048	3.19507	1	0	1			MAP6
671	MSPI0406S00447241	DENND3	1.22672e-20	7.81609e-14	0.0425238	0.0129224	1.92293	0.844641	0.683012	1	0	0			MAP6D1
672	MSPI0406S00447300		0.000825096	0.00673318	0.923659	0.857928	1.52021	0.662204	0.49446	1	0	0			MAP7
673	MSPI0406S00447330		7.45932e-37	0.00657841	0	0.00294758	0.477675	4.0856	0.583701	0	1	0			MAPK14
674	MSPI0406S00447349		5.8946e-19	0.264071	0.0313366	1.41414e-06	-0.59921	1.53724	2.09955	0	0	1			MAPRE3
675	MSPI0406S00449125	PSCA	1.18198e-14	3.97951e-08	1.54837e-07	1.32947e-14	0.907375	1.40895	1.53872	0	0	1			MARCKSL1
676	MSPI0406S00449173	SLURP1	5.32986e-11	0.0100259	0.181615	6.1915e-10	0.67469	0.703388	1.6965	0	0	1			MARK2
677	MSPI0406S00449794	TOP1MT	4.17334e-14	0.0175158	0.00117296	6.06446e-12	0.560019	1.17011	1.67476	0	0	1			MARK4
678	MSPI0406S00449936	MAFA	7.49861e-18	0	3.72994e-09	2.40545e-11	-1.57863	-1.54105	-1.21317	1	1	0			MARS2
679	MSPI0406S00450219	TSTA3	0.00155622	0.131861	0.00985142	1	-0.862511	-2.17958	-0.187503	0	1	0			MAST1
680	MSPI0406S00450306	DKFZp434I2135	4.82149e-09	5.79986e-09	0.00207427	5.36571e-09	1.74491	1.57081	1.97235	1	1	1			MATN1
681	MSPI0406S00450366		4.97639e-08	2.66712e-06	0.000878022	0.297505	-1.28389	-1.5049	-0.471639	0	1	0			MBD6
682	MSPI0406S00450367		2.61985e-16	0.262544	0.138321	1.08413e-11	0.376823	0.74625	1.87527	0	0	1			MBLAC1
683	MSPI0406S00450637	PLEC1	3.03117e-05	0.000605715	0.00676551	0.437896	-1.51405	-2.00189	-0.633499	1	1	0			MC1R
684	MSPI0406S00450711	GRINA	4.44972e-09	0.703301	0.00011712	0.00017896	0.317978	2.11054	1.44524	0	1	0			MCM3APAS
685	MSPI0406S00450798	EXOSC4	4.5182e-12	1.24776e-05	0.522101	4.56677e-12	1.07531	0.5008	1.95371	0	0	1			MDC1
685	MSPI0406S00450798	GPAA1	4.5182e-12	1.24776e-05	0.522101	4.56677e-12	1.07531	0.5008	1.95371	0	0	1			MDM2
686	MSPI0406S00450831	KIAA1875	6.37595e-06	0.530612	0.00416923	1	-0.420354	1.78877	-0.25395	0	1	0			ME1
686	MSPI0406S00450831	MAF1	6.37595e-06	0.530612	0.00416923	1	-0.420354	1.78877	-0.25395	0	1	0			MED25
686	MSPI0406S00450831	SHARPIN	6.37595e-06	0.530612	0.00416923	1	-0.420354	1.78877	-0.25395	0	1	0			MEF2C
687	MSPI0406S00450832	KIAA1875	3.91618e-06	0.833506	0.00202349	1	-0.220685	1.5236	0.030479	0	1	0			MEF2D
687	MSPI0406S00450832	MAF1	3.91618e-06	0.833506	0.00202349	1	-0.220685	1.5236	0.030479	0	1	0			MEOX2
687	MSPI0406S00450832	SHARPIN	3.91618e-06	0.833506	0.00202349	1	-0.220685	1.5236	0.030479	0	1	0			MFSD3
688	MSPI0406S00451278	C8orfK29	7.92671e-11	0.798316	0.00720438	1.91854e-06	0.314418	1.77667	2.01535	0	1	1			MGC16703
688	MSPI0406S00451278	FBXL6	7.92671e-11	0.798316	0.00720438	1.91854e-06	0.314418	1.77667	2.01535	0	1	1			MGC29506
688	MSPI0406S00451278	GPR172A	7.92671e-11	0.798316	0.00720438	1.91854e-06	0.314418	1.77667	2.01535	0	1	1			MICALL1
689	MSPI0406S00451392	VPS28	4.31225e-07	0.127268	9.91504e-06	0.00197199	0.44303	1.68103	0.884291	0	1	0			MIOX
690	MSPI0406S00451516	GPT	1.55358e-05	0.000159102	0.0728041	3.02936e-05	1.10417	1.01838	1.51201	0	0	1			MKI67
690	MSPI0406S00451516	MFSD3	1.55358e-05	0.000159102	0.0728041	3.02936e-05	1.10417	1.01838	1.51201	0	0	1			MLF2
691	MSPI0406S00455081		4.26111e-09	5.88584e-08	2.02197e-07	2.92392e-07	1.09544	1.70971	1.14695	0	1	0			MLX
692	MSPI0406S00456726	CDKN2B	2.41979e-06	0.00126908	0.0252929	8.83486e-07	1.05749	1.46228	1.76824	0	0	1			MLXIP
693	MSPI0406S00457392		8.03313e-12	9.79679e-07	0.967383	1	1.61019	0.392501	0.126029	1	0	0			MMAB
694	MSPI0406S00458930	C9orf25	7.15023e-13	3.65844e-09	8.63894e-07	6.98786e-14	1.4828	1.9989	2.18585	0	1	1			MMP15
694	MSPI0406S00458930	DNAI1	7.15023e-13	3.65844e-09	8.63894e-07	6.98786e-14	1.4828	1.9989	2.18585	0	1	1			MMRN2
695	MSPI0406S00458931	C9orf25	8.03499e-11	1.82954e-05	2.17592e-05	3.22935e-11	1.16022	1.76663	1.94363	0	1	1			MOCOS
695	MSPI0406S00458931	DNAI1	8.03499e-11	1.82954e-05	2.17592e-05	3.22935e-11	1.16022	1.76663	1.94363	0	1	1			MORG1
696	MSPI0406S00459438	CD72	1.80858e-10	9.4593e-08	0.000129603	1.44721e-11	1.06899	1.2974	1.55659	0	0	1			MORN1
697	MSPI0406S00459439	CD72	1.35963e-18	0	1.21927e-09	0	1.74529	2.08516	2.36364	1	1	1			MPDU1
698	MSPI0406S00459479	C9orf100	9.49554e-07	1.43695e-07	0.00304658	7.11883e-05	1.50412	1.48697	1.30863	1	0	0			MRC2
699	MSPI0406S00459480	C9orf100	1.59384e-14	0.922326	4.89145e-06	6.33994e-07	0.175944	1.91833	1.50397	0	1	1			MRGPRD
700	MSPI0406S00459583	HINT2	5.21451e-11	2.93914e-11	6.33888e-06	1.51809e-05	1.801	1.91534	1.27726	1	1	0			MRI1
700	MSPI0406S00459583	SPAG8	5.21451e-11	2.93914e-11	6.33888e-06	1.51809e-05	1.801	1.91534	1.27726	1	1	0			MRPL10
701	MSPI0406S00459584	HINT2	5.48832e-09	1.61329e-09	4.9153e-05	3.78848e-05	1.60076	1.7527	1.29264	1	1	0			MRPL22
701	MSPI0406S00459584	SPAG8	5.48832e-09	1.61329e-09	4.9153e-05	3.78848e-05	1.60076	1.7527	1.29264	1	1	0			MRPL28
702	MSPI0406S00468946	DAPK1	5.55135e-11	0.00687314	1	1.15998e-09	0.874462	0.172376	2.06162	0	0	1			MRPL33
703	MSPI0406S00469123	C9orf79	5.99541e-06	0.000170125	0.00030827	8.51217e-06	1.25188	2.01711	1.65769	0	1	1			MRPL35
704	MSPI0406S00469124	C9orf79	0.00320389	0.00649886	0.0062529	0.0426102	0.979465	1.60956	0.903713	0	1	0			MRPL43
705	MSPI0406S00469670	C9orf47	3.28809e-08	0.000379796	1.37644e-05	1.10732e-07	0.912864	1.75291	1.45516	0	1	0			MRPS2
705	MSPI0406S00469670	S1PR3	3.28809e-08	0.000379796	1.37644e-05	1.10732e-07	0.912864	1.75291	1.45516	0	1	0			MRPS36
706	MSPI0406S00469687		4.18568e-06	0.00571148	0.00893812	1	1.05393	1.63943	0.0763695	0	1	0			MSLNL
707	MSPI0406S00470022	UNQ6494	6.36009e-10	4.75967e-07	0.975791	0.250093	1.86089	0.420086	0.681851	1	0	0			MST1
708	MSPI0406S00471260		2.78867e-18	0.000112582	0	1.14495e-07	0.702604	3.01883	1.17071	0	1	0			MST1R
709	MSPI0406S00471565		3.11384e-16	0.764232	1	3.35754e-07	-0.260466	-0.161186	1.68833	0	0	1			MSX2
710	MSPI0406S00471633	NINJ1	1.90271e-07	0.00903604	3.97076e-06	0.92363	0.977756	2.58399	0.296469	0	1	0			MSX2P1
711	MSPI0406S00473576	HABP4	4.44991e-06	0.00225806	1	1	1.6316	-0.185257	0.364755	1	0	0			MT1X
712	MSPI0406S00474174	XPA	3.49005e-07	6.33732e-06	0.0223989	1.01953e-07	1.18935	1.05387	1.5118	0	0	1			MTERFD1
713	MSPI0406S00474175	XPA	1.47271e-13	5.01224e-08	1.8193e-05	2.42133e-14	1.09609	1.40024	1.82203	0	0	1			MTHFS
714	MSPI0406S00474692	GABBR2	4.84712e-07	5.20143e-07	0.000704279	6.27169e-07	1.33433	1.52969	1.49564	0	1	0			MTMR10
715	MSPI0406S00474741	ANKS6	1.02557e-10	1.85548e-05	0.691985	1	1.90175	0.753	-0.0321962	1	0	0			MTMR11
716	MSPI0406S00475081	STX17	1.88442e-13	5.38597e-10	1	0.00636299	2.27954	-0.177811	1.22972	1	0	0			MTP18
717	MSPI0406S00476262	ZNF462	2.09191e-08	9.89842e-06	9.5179e-07	1.62797e-07	1.09584	1.96402	1.46502	0	1	0			MTR
718	MSPI0406S00477022	C9orf4	2.23746e-14	5.2363e-14	7.8022e-08	1.41584e-05	-1.75194	-1.97485	-1.11934	1	1	0			MTSS1L
719	MSPI0406S00480566		1.89485e-06	0.00149829	0.000299949	4.31874e-06	1.44531	2.64253	2.26929	0	1	1			MUC4
720	MSPI0406S00481461	PTGS1	1.8297e-05	0.000674487	0.00178467	1.49599e-05	1.06036	1.62529	1.50334	0	1	1			MUPCDH
721	MSPI0406S00482747	OLFML2A	3.92991e-08	2.11131e-08	0.0690072	0.00235532	1.67211	1.07395	1.09809	1	0	0			MUSTN1
722	MSPI0406S00482748	OLFML2A	7.67403e-10	1.66506e-07	0.627826	0.266118	1.50388	0.531238	0.533301	1	0	0			MVD
723	MSPI0406S00484413	SLC2A8	2.05281e-06	0.0996075	0.0074742	2.02293e-05	0.633378	1.48331	1.51461	0	0	1			MVK
724	MSPI0406S00484603		3.65775e-09	1.15108e-08	0.000138243	1.36203e-09	1.37478	1.54849	1.65259	0	1	1			MYBPH
725	MSPI0406S00484746	C9orf117	0.000160334	0.00378243	0.207123	4.51076e-05	1.39762	1.28752	2.11642	0	0	1			MYCBPAP
726	MSPI0406S00484784	TOR2A	1.40398e-19	1.94867e-14	0.000352728	0.0719518	2.50836	1.83344	0.750581	1	1	0			MYH3
727	MSPI0406S00484842	SH2D3C	1.43717e-08	3.79016e-09	1.54504e-05	8.09908e-07	1.32038	1.59636	1.2433	0	1	0			MYL10
728	MSPI0406S00484885		7.90098e-14	1.47289e-09	0.808162	0.362138	2.89123	0.713078	0.785247	1	0	0			MYL2
729	MSPI0406S00484961	AK1	2.83508e-09	5.00533e-09	1.49372e-05	1.27128e-07	2.22052	2.53993	2.14798	1	1	1			MYLIP
730	MSPI0406S00485016	ST6GALNAC4	6.58034e-19	3.67104e-14	0.00132171	0	2.03553	1.45877	2.85472	1	0	1			MYO1E
731	MSPI0406S00485051	DPM2	3.42254e-14	0.0763448	9.20797e-05	1.1118e-10	0.435361	1.32863	1.50232	0	0	1			MYO9A
732	MSPI0406S00485403	CIZ1	5.11389e-07	0.00223881	9.50306e-06	7.79435e-06	1.12401	2.42307	1.70094	0	1	1			MYOM3
732	MSPI0406S00485403	DNM1	5.11389e-07	0.00223881	9.50306e-06	7.79435e-06	1.12401	2.42307	1.70094	0	1	1			NADSYN1
733	MSPI0406S00485475	C9orf119	3.33217e-08	0.0832563	0.717061	4.84002e-07	0.629212	0.501059	1.71695	0	0	1			NAMPT
733	MSPI0406S00485475	GOLGA2	3.33217e-08	0.0832563	0.717061	4.84002e-07	0.629212	0.501059	1.71695	0	0	1			NANOG
734	MSPI0406S00485780	SPTAN1	0.000144257	0.00228699	0.00363661	0.418935	-1.05719	-1.63238	-0.49986	0	1	0			NAPB
735	MSPI0406S00486050	TBC1D13	9.78052e-19	1	0.0158854	3.89611e-10	0.0674262	1.33185	2.22312	0	0	1			NASP
736	MSPI0406S00486208	PHYHD1	1.5257e-14	0.896114	2.6606e-08	0.0556093	-0.171868	2.23893	0.6248	0	1	0			NAV2
737	MSPI0406S00486248	DOLK	1.87677e-14	8.5571e-07	9.40989e-10	2.88629e-13	0.968934	1.97667	1.68546	0	1	1			NBEAL2
737	MSPI0406S00486248	NUP188	1.87677e-14	8.5571e-07	9.40989e-10	2.88629e-13	0.968934	1.97667	1.68546	0	1	1			NCF4
738	MSPI0406S00486447	CRAT	8.90675e-06	6.78297e-05	0.000199719	6.03785e-05	1.43299	2.25544	1.67121	0	1	1			NCK2
738	MSPI0406S00486447	PPP2R4	8.90675e-06	6.78297e-05	0.000199719	6.03785e-05	1.43299	2.25544	1.67121	0	1	1			NCRNA00181
739	MSPI0406S00487167	PRRX2	2.52245e-10	6.47565e-08	0.000642278	0.136321	-1.82335	-2.02774	-0.715764	1	1	0			NDUFA4
740	MSPI0406S00487992		4.50003e-08	0.0144483	3.60145e-07	0.721205	0.495714	1.52371	0.208064	0	1	0			NDUFAF3
741	MSPI0406S00488870	PPAPDC3	1.46037e-11	0.141471	1.21271e-07	2.13398e-06	0.62254	2.83964	1.7793	0	1	1			NDUFS8
742	MSPI0406S00488871	PPAPDC3	1.57389e-14	0.00852115	2.49552e-10	3.94799e-09	0.865894	3.15651	2.02716	0	1	1			NEDD9
743	MSPI0406S00490279		3.09033e-11	0.000423358	0.000141488	8.62642e-11	1.14046	2.02763	2.31687	0	1	1			NEIL2
744	MSPI0406S00490624	OBP2B	0.000302282	0.08035	0.000218109	0.123586	0.899769	2.63862	0.953685	0	1	0			NETO1
745	MSPI0406S00490764	SNORD36A	7.16461e-08	0.0105298	0.00733904	1.64807e-07	0.737776	1.26847	1.56236	0	0	1			NEURL2
745	MSPI0406S00490764	SNORD36B	7.16461e-08	0.0105298	0.00733904	1.64807e-07	0.737776	1.26847	1.56236	0	0	1			NEURL4
745	MSPI0406S00490764	SNORD36C	7.16461e-08	0.0105298	0.00733904	1.64807e-07	0.737776	1.26847	1.56236	0	0	1			NEUROD1
745	MSPI0406S00490764	SURF1	7.16461e-08	0.0105298	0.00733904	1.64807e-07	0.737776	1.26847	1.56236	0	0	1			NFYB
745	MSPI0406S00490764	SURF2	7.16461e-08	0.0105298	0.00733904	1.64807e-07	0.737776	1.26847	1.56236	0	0	1			NGRN
746	MSPI0406S00490766	SURF1	1.08342e-05	0.000143263	0.00188211	0.279608	-1.15929	-1.62051	-0.540879	0	1	0			NHS
746	MSPI0406S00490766	SURF2	1.08342e-05	0.000143263	0.00188211	0.279608	-1.15929	-1.62051	-0.540879	0	1	0			NINJ1
747	MSPI0406S00490767	SURF1	1.28815e-05	0.0448947	8.03797e-05	0.00147363	0.614088	1.71413	1.02096	0	1	0			NIP7
747	MSPI0406S00490767	SURF2	1.28815e-05	0.0448947	8.03797e-05	0.00147363	0.614088	1.71413	1.02096	0	1	0			NIPAL3
748	MSPI0406S00490858		2.22306e-06	0.640419	2.07275e-05	0.288371	0.334006	2.32155	0.578988	0	1	0			NKG7
749	MSPI0406S00490990	ADAMTSL2	2.88367e-09	4.8286e-06	3.78176e-09	5.44653e-05	1.25009	2.60635	1.39117	0	1	0			NKX2-1
750	MSPI0406S00490991	ADAMTSL2	5.91244e-13	4.50433e-09	1.61194e-09	1.62938e-12	1.83282	3.02937	2.56224	1	1	1			NKX6-3
751	MSPI0406S00492210		2.13224e-08	0.000689239	7.11397e-08	2.24079e-05	0.890541	2.21708	1.21478	0	1	0			NLGN4X
752	MSPI0406S00492211		1.08973e-10	0.000203637	4.28701e-09	7.08413e-08	1.14644	2.84465	1.83627	0	1	1			NLRP10
753	MSPI0406S00492778	FCN1	0.000105829	0.0947469	1	0.000204026	0.971698	0.313348	2.02953	0	0	1			NLRP11
754	MSPI0406S00493061		3.7616e-05	0.000974626	0.00342245	0.504542	1.3353	1.98447	0.558158	0	1	0			NLRP4
755	MSPI0406S00493062		0.00101479	0.00574794	0.00183828	0.0168966	0.955265	1.71554	0.967879	0	1	0			NLRP8
756	MSPI0406S00493465	C9orf116	2.70551e-11	3.68409e-06	8.45858e-05	9.6811e-12	1.36614	1.96664	2.34226	0	1	1			NLRX1
756	MSPI0406S00493465	MRPS2	2.70551e-11	3.68409e-06	8.45858e-05	9.6811e-12	1.36614	1.96664	2.34226	0	1	1			NMT1
757	MSPI0406S00494265	C9orf69	7.36898e-18	1.93166e-06	2.68506e-07	0	1.45106	2.54107	3.08657	0	1	1			NOC2L
758	MSPI0406S00494266	C9orf69	6.78371e-12	1.29692e-07	5.0117e-05	6.94808e-13	1.49073	1.86392	2.3412	0	1	1			NOL11
759	MSPI0406S00494652	INPP5E	8.96872e-08	0.00477888	0.000513287	6.16428e-07	0.990913	1.95483	1.87087	0	1	1			NOLC1
760	MSPI0406S00494653	INPP5E	3.09841e-09	0.00210687	8.24458e-05	2.1519e-08	1.35097	2.73853	2.65445	0	1	1			NOV
761	MSPI0406S00494734		2.867e-08	3.85329e-07	0.00689059	4.52633e-09	1.20525	1.14518	1.59709	0	0	1			NRM
762	MSPI0406S00495598	C9orf140	2.87021e-12	0.000998354	0.110295	2.7073e-12	0.652598	0.680897	1.52888	0	0	1			NRSN2
763	MSPI0406S00495852	FAM166A	2.12363e-10	2.8312e-06	0.000287109	2.3441e-11	0.983233	1.28066	1.60659	0	0	1			NRXN2
763	MSPI0406S00495852	TUBB2C	2.12363e-10	2.8312e-06	0.000287109	2.3441e-11	0.983233	1.28066	1.60659	0	0	1			NSUN4
764	MSPI0406S00496662	CACNA1B	0.00191756	0.00295818	0.0875345	0.00162335	-1.24692	-1.36802	-1.54837	0	0	1			NT5C1A
765	MSPI0406S00496663	CACNA1B	0.000769797	0.00144909	0.0660633	0.00030231	-1.34843	-1.47036	-1.69904	0	0	1			NTHL1
766	MSPI0406S00499563	KLF6	1.4036e-08	5.89307e-07	4.19075e-05	7.11918e-09	2.00869	2.79918	2.65237	1	1	1			NTN3
767	MSPI0406S00500079	CALML5	1.20338e-05	0.000193461	2.11637e-05	0.00111011	1.26826	2.32506	1.30374	0	1	0			NUAK2
768	MSPI0406S00500513	IL2RA	1.01552e-31	0	0.517812	0.865733	2.41428	-0.58596	-0.269322	1	0	0			NUCB1
769	MSPI0406S00500537	RBM17	1.44889e-07	2.56714e-07	0.0148955	0.00695044	1.52349	1.23911	0.957966	1	0	0			NUDT1
770	MSPI0406S00501433	TAF3	0.00944138	0.0484297	0.109235	0.00568156	-1.19759	-1.71181	-1.75209	0	0	1			NUDT12
771	MSPI0406S00501572		1.58221e-25	0.0114312	0.0665131	0	0.743884	0.966624	3.05374	0	0	1			NUDT16L1
772	MSPI0406S00502534	ECHDC3	9.68079e-06	0.00964263	4.21705e-05	0.000520432	0.650469	1.56592	0.940249	0	1	0			NUDT5
773	MSPI0406S00502957	CDC123	4.33334e-07	0.000146161	0.994391	8.94113e-07	1.59048	0.451434	2.23849	1	0	1			NUMB
773	MSPI0406S00502957	NUDT5	4.33334e-07	0.000146161	0.994391	8.94113e-07	1.59048	0.451434	2.23849	1	0	1			NUP107
774	MSPI0406S00503108	CAMK1D	8.27936e-07	6.75211e-07	0.00698685	5.2796e-07	2.01578	1.94379	2.31918	1	1	1			NUP188
775	MSPI0406S00503109	CAMK1D	1.37888e-06	6.65096e-05	0.008787	2.35074e-07	1.53299	1.79525	2.21684	1	1	1			NUP205
776	MSPI0406S00503721	UCMA	4.99039e-14	0.00254431	0.000227411	1.53295e-12	0.969901	1.85555	2.47834	0	1	1			NUP43
777	MSPI0406S00503722	UCMA	3.32213e-08	0.000895836	0.22296	8.39884e-08	0.891906	0.716081	1.64191	0	0	1			NUP62
778	MSPI0406S00507415	PTF1A	1.85869e-10	2.97701e-10	6.38651e-05	7.88239e-11	1.42012	1.46505	1.67072	0	0	1			NUTF2
779	MSPI0406S00508602	ANKRD26	3.51648e-06	0.360542	0.000142195	1	0.441589	1.97268	-0.0876885	0	1	0			NXPH2
780	MSPI0406S00508903	ARMC4	1.38935e-07	2.28322e-05	0.331246	4.96698e-08	1.32587	0.769047	1.92197	0	0	1			OAF
781	MSPI0406S00509727		1.08842e-08	7.737e-09	0.544026	3.85641e-05	1.65063	0.601674	1.36503	1	0	0			OAZ2
782	MSPI0406S00509728		1.99385e-08	0.00291049	5.70935e-05	1.41951e-07	0.991366	2.0714	1.85983	0	1	1			OBFC2B
783	MSPI0406S00512482	ZNF25	0.00431873	0.01909	1	0.00549185	1.26344	0.359691	1.64117	0	0	1			OBP2B
784	MSPI0406S00513499	ZNF485	1.22057e-11	2.75934e-06	3.45255e-06	4.25903e-12	0.929024	1.4407	1.51911	0	0	1			OCIAD2
785	MSPI0406S00513795		0.000221662	0.16598	0.000450145	0.0313266	0.744356	2.44535	1.15749	0	1	0			OGG1
786	MSPI0406S00514015	C10orf10	5.05556e-12	0.117027	9.5179e-07	1.54021e-07	0.375331	1.51951	1.14431	0	1	0			OLFM2
786	MSPI0406S00514015	RASSF4	5.05556e-12	0.117027	9.5179e-07	1.54021e-07	0.375331	1.51951	1.14431	0	1	0			OLFML2A
787	MSPI0406S00515606	WDFY4	9.08487e-05	1	0.00292531	0.789093	-0.0415189	1.512	0.30642	0	1	0			OLFML3
788	MSPI0406S00517782	ANK3	3.64823e-18	5.98987e-12	2.6777e-12	0	0.987178	1.63674	1.52019	0	1	1			OPN3
789	MSPI0406S00518037		7.06846e-18	4.40743e-06	0.140355	0.59667	1.57921	-1.07911	-0.448685	1	0	0			OR4D1
790	MSPI0406S00518038		2.12084e-07	0.000184048	0.693178	0.0256844	1.51871	-0.671578	1.1301	1	0	0			OR6B3
791	MSPI0406S00519754	SRGN	1.8191e-11	1.10544e-11	0.000114409	3.00811e-05	2.14311	1.93267	1.44891	1	1	0			OR6V1
792	MSPI0406S00520796	PRF1	2.96782e-28	0.750616	1	0	-0.225616	-0.217415	2.31407	0	0	1			OR8B8
793	MSPI0406S00520797	PRF1	9.55868e-27	0.83835	1	0	0.232333	0.237809	2.97369	0	0	1			OTOP1
794	MSPI0406S00520931	SGPL1	1.51132e-09	5.17849e-05	2.52602e-06	0.750733	1.8421	3.41362	0.48969	1	1	0			OTUB2
795	MSPI0406S00521150	UNC5B	3.62576e-12	1.57324e-09	1.19783e-05	3.45586e-13	1.45101	1.70548	2.03959	0	1	1			P2RX4
796	MSPI0406S00521260	SLC29A3	1.69487e-12	6.98669e-11	3.93713e-08	6.74601e-13	1.41942	1.91649	1.79774	0	1	1			P2RX6
797	MSPI0406S00521602		1.85574e-07	0.000259299	0.00158822	8.14098e-08	1.20315	1.78914	1.95848	0	1	1			P4HA2
798	MSPI0406S00522800	FUT11	2.12408e-14	0.349974	1	1.06699e-09	0.308312	0.156174	1.53717	0	0	1			PABPN1
799	MSPI0406S00522914	PLAU	5.14956e-09	6.74486e-10	0.000411778	2.86495e-05	1.67453	1.65818	1.35424	1	1	0			PAICS
800	MSPI0406S00525931	SH2D4B	6.36404e-13	1.2302e-05	3.95466e-09	0.667784	1.83026	3.63878	0.459954	1	1	0			PAK6
801	MSPI0406S00526476	PCDH21	4.60231e-12	1.63055e-11	7.32705e-07	0.000282454	-1.90371	-2.23901	-1.15376	1	1	0			PAQR4
802	MSPI0406S00527148	WAPAL	4.94327e-13	1	1.98439e-09	1	-0.0280613	2.3296	-0.163328	0	1	0			PAQR5
803	MSPI0406S00527431	MMRN2	2.82628e-18	8.44505e-08	4.01494e-08	0	1.02239	1.71679	2.01146	0	1	1			PAX3
803	MSPI0406S00527431	SNCG	2.82628e-18	8.44505e-08	4.01494e-08	0	1.02239	1.71679	2.01146	0	1	1			PCDH12
804	MSPI0406S00527443	AGAP11	1.65812e-06	0.00732296	0.0238663	1.13638e-06	0.982933	1.41733	1.86953	0	0	1			PCDH17
804	MSPI0406S00527443	C10orf116	1.65812e-06	0.00732296	0.0238663	1.13638e-06	0.982933	1.41733	1.86953	0	0	1			PCDH20
805	MSPI0406S00527448	AGAP11	5.14602e-11	3.80754e-08	7.20147e-07	7.69379e-11	1.57129	2.47489	2.28074	1	1	1			PCDH21
805	MSPI0406S00527448	C10orf116	5.14602e-11	3.80754e-08	7.20147e-07	7.69379e-11	1.57129	2.47489	2.28074	1	1	1			PCDH7
806	MSPI0406S00527449	AGAP11	2.81141e-12	5.89942e-10	6.09397e-09	3.43389e-12	1.65061	2.47028	2.06501	1	1	1			PCDHB16
806	MSPI0406S00527449	C10orf116	2.81141e-12	5.89942e-10	6.09397e-09	3.43389e-12	1.65061	2.47028	2.06501	1	1	1			PCDHB9
807	MSPI0406S00527910	CH25H	1.24535e-15	0	1.06988e-09	5.4918e-13	2.72849	3.03481	2.64294	1	1	1			PCGF1
808	MSPI0406S00529880	DNTT	4.18577e-14	0	8.58332e-06	3.21884e-07	2.66167	2.31516	1.90333	1	1	1			PCGF6
809	MSPI0406S00530273		2.78997e-11	1.41263e-09	0.00637149	2.5383e-12	2.29049	1.8004	3.02123	1	1	1			PCK1
810	MSPI0406S00530907		1.73445e-11	0.368834	0.023509	4.56476e-08	0.466109	1.39433	2.07037	0	0	1			PCMT1
811	MSPI0406S00531092	LOXL4	2.38807e-05	0.00194104	0.000466969	5.80544e-05	1.01358	1.83915	1.43383	0	1	0			PCNA
812	MSPI0406S00532242	C10orf2	2.51725e-10	0.819629	8.31103e-05	5.3666e-05	0.207468	1.67858	1.17282	0	1	0			PCOLCE
812	MSPI0406S00532242	MRPL43	2.51725e-10	0.819629	8.31103e-05	5.3666e-05	0.207468	1.67858	1.17282	0	1	0			PCSK2
813	MSPI0406S00533029	NOLC1	0.000751395	0.000332035	0.550303	0.0187502	1.77498	0.95844	1.4569	1	0	0			PDCD7
814	MSPI0406S00533589		5.83017e-07	2.96042e-07	0.226238	2.89743e-05	1.82352	0.981567	1.7197	1	0	1			PDIA6
815	MSPI0406S00533590		2.53504e-08	9.38959e-09	0.068731	1.56152e-07	2.12111	1.32759	2.17794	1	0	1			PECI
816	MSPI0406S00533949	PCGF6	2.69664e-10	2.88746e-08	1.64241e-09	1.02434e-07	0.998887	1.75592	1.08507	0	1	0			PELI3
817	MSPI0406S00534044	CALHM1	4.17648e-09	0.000182897	1.00937e-05	2.80011e-08	1.16443	2.2326	1.95569	0	1	1			PER1
817	MSPI0406S00534044	CALHM2	4.17648e-09	0.000182897	1.00937e-05	2.80011e-08	1.16443	2.2326	1.95569	0	1	1			PFKFB2
818	MSPI0406S00534580	ITPRIP	2.82976e-26	5.97551e-13	0.721089	0.76588	2.07391	0.462642	-0.299146	1	0	0			PFKFB4
819	MSPI0406S00537864	KCNK18	2.72904e-06	0.000199859	7.19569e-05	0.141835	1.04605	1.74527	0.579905	0	1	0			PGLS
820	MSPI0406S00538634	FAM45A	6.13101e-09	0.0439226	5.67925e-06	4.89493e-06	0.606841	1.91149	1.35616	0	1	0			PGLYRP4
821	MSPI0406S00541475		1.02107e-05	0.0218382	8.30396e-06	0.243146	0.987712	2.76413	0.725467	0	1	0			PHF20
822	MSPI0406S00541476		1.64314e-11	9.76457e-06	7.76746e-12	5.90416e-06	1.40547	3.49869	1.61339	0	1	1			PHF23
823	MSPI0406S00541591		1.45808e-07	0.00813192	2.2676e-06	0.772999	1.43684	3.88195	0.532804	0	1	0			PHLDB2
824	MSPI0406S00541592		1.47271e-13	3.31166e-06	8.62139e-13	0.0193367	1.1873	2.95934	0.733111	0	1	0			PHLPP1
825	MSPI0406S00543310	PTPRE	6.14244e-16	3.67104e-14	9.95866e-07	5.41379e-05	3.30792	3.14192	1.8486	1	1	1			PHOX2B
826	MSPI0406S00543311	PTPRE	1.56358e-10	1.77231e-11	0.000170044	1.65258e-05	2.01463	1.8875	1.45369	1	1	0			PHYHD1
827	MSPI0406S00543494	MKI67	0.000234565	0.00196366	0.000755092	0.00428118	1.3989	2.51943	1.48785	0	1	0			PIGR
828	MSPI0406S00544501		3.03942e-10	0.00213781	0.0151667	3.79493e-10	1.05525	1.43749	2.30588	0	0	1			PIN4
829	MSPI0406S00546707		1.48882e-11	1	0.0466594	8.87464e-07	0.165286	1.15915	1.68093	0	0	1			PIP4K2B
830	MSPI0406S00547355	C10orf93	8.39063e-05	0.0276722	0.00587288	0.000155404	0.819756	1.60381	1.42856	0	1	0			PITPNM2
831	MSPI0406S00547619	KNDC1	0.0025	0.598419	0.00342245	0.435231	0.392454	1.84662	0.553785	0	1	0			PJA2
832	MSPI0406S00547867		1.0556e-09	6.57701e-09	0.000187167	0.0248097	-1.64666	-1.73141	-0.790505	1	1	0			PLAGL2
833	MSPI0406S00548346	IFITM1	4.31929e-15	0	5.36028e-07	2.42133e-14	1.71545	1.72011	1.84528	1	1	1			PLAU
833	MSPI0406S00548346	IFITM2	4.31929e-15	0	5.36028e-07	2.42133e-14	1.71545	1.72011	1.84528	1	1	1			PLB1
834	MSPI0406S00548347	IFITM1	1.3843e-15	0	0.000615413	5.52211e-08	1.52097	1.04687	1.07462	1	0	0			PLCB1
835	MSPI0406S00548599	RNH1	2.4327e-14	2.52905e-09	5.07569e-08	1.32947e-14	1.20371	1.78331	1.84572	0	1	1			PLCB3
836	MSPI0406S00548788	MUPCDH	2.02854e-08	0.106323	5.50208e-06	7.68784e-05	0.629385	2.32897	1.45927	0	1	0			PLCXD2
836	MSPI0406S00548788	SCT	2.02854e-08	0.106323	5.50208e-06	7.68784e-05	0.629385	2.32897	1.45927	0	1	0			PLEC1
837	MSPI0406S00548791	MUPCDH	1.02584e-15	0.00432173	2.49279e-05	1.60195e-12	0.731305	1.67284	2.03935	0	1	1			PLEKHF1
837	MSPI0406S00548791	SCT	1.02584e-15	0.00432173	2.49279e-05	1.60195e-12	0.731305	1.67284	2.03935	0	1	1			PLEKHG4
838	MSPI0406S00548885	DEAF1	9.36583e-10	4.02812e-09	8.39321e-05	2.08129e-10	1.38682	1.53363	1.71659	0	1	1			PLEKHM2
838	MSPI0406S00548885	TMEM80	9.36583e-10	4.02812e-09	8.39321e-05	2.08129e-10	1.38682	1.53363	1.71659	0	1	1			PLOD3
839	MSPI0406S00550121	KRTAP5-5	2.59443e-09	0.365511	1	5.81641e-07	0.441026	0.301107	1.75765	0	0	1			PLSCR4
840	MSPI0406S00550122	KRTAP5-5	4.1033e-12	0.0137427	0.303367	6.96519e-11	0.73008	0.678532	1.97501	0	0	1			PLXNC1
841	MSPI0406S00550288	CTSD	3.53335e-12	0.0130245	0.000122104	2.91145e-10	0.741115	1.7474	1.93802	0	1	1			PLXND1
841	MSPI0406S00550288	HCCA2	3.53335e-12	0.0130245	0.000122104	2.91145e-10	0.741115	1.7474	1.93802	0	1	1			PMAIP1
842	MSPI0406S00550400	LSP1	6.09749e-18	8.98439e-14	3.28408e-09	0	1.89042	2.23628	2.59107	1	1	1			PML
843	MSPI0406S00550401	LSP1	2.22051e-12	0.0867426	0.100685	5.74392e-10	0.461484	0.743683	1.57159	0	0	1			PNMA3
844	MSPI0406S00550454		1.18285e-08	1.7158e-05	0.00111522	0.405913	-1.7968	-2.10659	-0.598604	1	1	0			PNMA5
845	MSPI0406S00550939	ASCL2	9.44806e-05	0.000352745	0.000283755	0.00188378	-1.03232	-1.69833	-1.04922	0	1	0			POFUT1
846	MSPI0406S00551064	CD81	2.33146e-05	0.00639823	0.00710287	1.82951e-05	1.14807	1.87512	1.89887	0	1	1			POL3S
847	MSPI0406S00552069	LOC650368	2.83888e-13	0.000103122	5.07596e-06	1.43903e-12	0.859193	1.86149	1.79368	0	1	1			POLD1
847	MSPI0406S00552069	ZNF195	2.83888e-13	0.000103122	5.07596e-06	1.43903e-12	0.859193	1.86149	1.79368	0	1	1			POLD3
848	MSPI0406S00553107	TPP1	4.28912e-12	0.635434	6.03515e-10	0.0195531	0.155786	1.51435	0.444502	0	1	0			POLE4
849	MSPI0406S00553109	TPP1	4.0689e-12	0.099245	2.2716e-10	0.000208798	0.361362	1.85849	0.771503	0	1	0			POLH
850	MSPI0406S00553177	ZNF215	2.16791e-05	7.43523e-05	0.00363619	1.22175e-05	1.37453	1.74119	1.68525	0	1	1			POLK
851	MSPI0406S00553378	NLRP10	5.79733e-06	1.8026e-05	0.00870821	0.128367	1.71892	1.8939	0.891167	1	1	0			POLM
852	MSPI0406S00553418	TUB	4.5003e-07	3.29772e-07	8.87732e-05	9.33821e-06	1.79369	2.24382	1.80232	1	1	1			POLR2I
853	MSPI0406S00553419	TUB	2.99287e-07	1.13952e-07	0.0074313	0.00209857	1.61136	1.44435	1.11841	1	0	0			PPAPDC3
854	MSPI0406S00554590	RNF141	2.27666e-11	0.00332868	0.835471	0.430076	1.5042	-0.692212	-0.737065	1	0	0			PPARD
855	MSPI0406S00555702	RRAS2	4.0675e-06	0.000320089	1	0.342213	1.5335	-0.0169317	0.688627	1	0	0			PPAT
856	MSPI0406S00555755	COPB1	6.09637e-05	0.0015727	0.0194563	0.672325	1.56034	2.01007	0.555467	1	0	0			PPP1CA
857	MSPI0406S00556689		0.000552515	0.0184957	0.0461031	0.000258235	0.974529	1.42172	1.5676	0	0	1			PPP1R14B
858	MSPI0406S00557315	LOC100126784	5.58419e-07	5.11518e-07	0.264553	0.000270713	1.52403	0.780806	1.27154	1	0	0			PPP1R15B
858	MSPI0406S00557315	NAV2	5.58419e-07	5.11518e-07	0.264553	0.000270713	1.52403	0.780806	1.27154	1	0	0			PPP1R3B
859	MSPI0406S00558282	ANO3	1.25058e-12	9.39665e-06	0.00228842	1	1.52707	1.76643	-0.13383	1	1	0			PPP2R4
860	MSPI0406S00559612	C11orf41	4.69897e-05	0.000110005	0.0782081	1.37698e-05	1.49894	1.33093	1.86109	0	0	1			PPP2R5C
861	MSPI0406S00559726	LMO2	3.53335e-16	3.98076e-12	2.2716e-10	0	1.53994	2.24527	2.17969	1	1	1			PPP4R4
862	MSPI0406S00560067	ELF5	6.35218e-11	3.29205e-12	9.61208e-05	5.86873e-08	2.5018	2.27454	2.15055	1	1	1			PPT2
863	MSPI0406S00560646	C11orf74	1.27901e-05	0.000454732	1	0.548091	1.76607	0.245557	0.668913	1	0	0			PRDM11
863	MSPI0406S00560646	RAG2	1.27901e-05	0.000454732	1	0.548091	1.76607	0.245557	0.668913	1	0	0			PRDM16
864	MSPI0406S00562232	TP53I11	1.72409e-13	1.21066e-12	4.97627e-09	2.06574e-05	2.77761	3.53369	1.82201	1	1	1			PREB
865	MSPI0406S00562319	PRDM11	1.31745e-15	0.0890319	1	1.04872e-11	0.725614	0.186418	2.7609	0	0	1			PRF1
866	MSPI0406S00564200	FNBP4	6.23646e-21	0	1	1.32947e-14	3.01805	-0.115346	3.17745	1	0	1			PRKAG1
867	MSPI0406S00565123	LRRC55	2.63364e-09	3.66059e-10	0.0258736	2.56719e-05	1.66605	1.09582	1.28135	1	0	0			PRKCB
868	MSPI0406S00565377	UBE2L6	0.00031524	0.00131982	0.917997	0.000558839	1.24903	0.482626	1.53269	0	0	1			PRKCH
869	MSPI0406S00565378	UBE2L6	1.37492e-06	0.0581859	0.347577	2.64668e-06	0.746617	0.810428	1.76107	0	0	1			PRKRIR
870	MSPI0406S00566532		2.91123e-15	0.0860075	9.96307e-08	4.40614e-10	0.582359	2.42127	1.97367	0	1	1			PRO1768
871	MSPI0406S00567213	C11orf9	2.04363e-07	0.00448094	0.000555917	1.08941e-06	0.813094	1.57095	1.51343	0	1	1			PROC
871	MSPI0406S00567213	DKFZp434K028	2.04363e-07	0.00448094	0.000555917	1.08941e-06	0.813094	1.57095	1.51343	0	1	1			PRPH
872	MSPI0406S00567424	RAB3IL1	8.14836e-07	7.79307e-07	0.00933719	0.02571	1.61508	1.55973	0.950531	1	1	0			PRR21
873	MSPI0406S00567890		5.05875e-15	1	3.08367e-09	0.000191549	0.0562305	1.92024	0.856543	0	1	0			PRRT1
874	MSPI0406S00568042	GANAB	9.40155e-06	0.0274399	6.36316e-05	0.0042514	0.76011	2.15601	1.06396	0	1	0			PRRX2
874	MSPI0406S00568042	INTS5	9.40155e-06	0.0274399	6.36316e-05	0.0042514	0.76011	2.15601	1.06396	0	1	0			PRSS21
875	MSPI0406S00568083	UBXN1	7.2445e-08	2.16466e-07	6.83798e-06	4.69756e-07	1.38612	1.95616	1.52903	0	1	1			PRUNE
876	MSPI0406S00568223	TMEM223	3.35117e-09	0.0545188	0.982014	5.50928e-08	0.572975	0.290204	1.56114	0	0	1			PRX
877	MSPI0406S00568828	MARK2	4.50907e-13	2.72723e-09	1.85668e-08	1.67876e-13	1.02429	1.54488	1.46714	0	1	0			PSCA
878	MSPI0406S00569251	FERMT3	2.06719e-11	1.31856e-07	0.00561226	1.32903e-12	1.06343	1.00432	1.65401	0	0	1			PSMB5
879	MSPI0406S00569294	DNAJC4	2.45822e-15	7.33487e-05	1.45705e-08	1.13802e-12	1.09314	2.51912	2.32283	0	1	1			PSMB9
879	MSPI0406S00569294	VEGFB	2.45822e-15	7.33487e-05	1.45705e-08	1.13802e-12	1.09314	2.51912	2.32283	0	1	1			PSMC1
880	MSPI0406S00569313	PLCB3	1.06328e-11	4.29678e-11	0.00132213	0.000139456	2.12762	1.6455	1.32653	1	1	0			PSMD2
880	MSPI0406S00569313	PPP1R14B	1.06328e-11	4.29678e-11	0.00132213	0.000139456	2.12762	1.6455	1.32653	1	1	0			PSME2
881	MSPI0406S00569314	PLCB3	6.42416e-10	1.5755e-07	0.256008	0.301284	1.7407	0.886612	0.584844	1	0	0			PSTPIP1
881	MSPI0406S00569314	PPP1R14B	6.42416e-10	1.5755e-07	0.256008	0.301284	1.7407	0.886612	0.584844	1	0	0			PTCHD2
882	MSPI0406S00569661	SLC22A11	7.02917e-16	0	4.98331e-08	0	1.7176	1.96542	2.00348	1	1	1			PTDSS1
883	MSPI0406S00569827	NRXN2	2.88911e-14	0	0.0105186	7.03787e-11	1.51725	0.851049	1.39933	1	0	0			PTF1A
884	MSPI0406S00569879	PYGM	6.80671e-16	1.28028e-12	0.102122	0.01317	1.87325	0.829305	0.775268	1	0	0			PTGER1
885	MSPI0406S00570062		6.67782e-16	0.168525	0.000281301	9.42744e-11	0.36147	1.24529	1.54013	0	0	1			PTGS1
886	MSPI0406S00570288	CDCA5	1.23422e-08	2.27994e-05	0.278007	1	2.01351	1.24393	0.269245	1	0	0			PTK2B
886	MSPI0406S00570288	ZFPL1	1.23422e-08	2.27994e-05	0.278007	1	2.01351	1.24393	0.269245	1	0	0			PTK6
887	MSPI0406S00570571	TIGD3	9.58256e-16	0	9.50919e-09	6.54402e-11	-2.58615	-2.76164	-2.16374	1	1	1			PTMS
888	MSPI0406S00570604	SLC25A45	2.12247e-14	0.0396833	0.00680198	6.68536e-12	0.527399	1.07493	1.74885	0	0	1			PTPN18
889	MSPI0406S00570850	EHBP1L1	7.35755e-12	0.000146338	9.16496e-05	1.68501e-11	0.863361	1.43473	1.73236	0	0	1			PTPRE
889	MSPI0406S00570850	FAM89B	7.35755e-12	0.000146338	9.16496e-05	1.68501e-11	0.863361	1.43473	1.73236	0	0	1			PTPRN2
889	MSPI0406S00570850	SSSCA1	7.35755e-12	0.000146338	9.16496e-05	1.68501e-11	0.863361	1.43473	1.73236	0	0	1			PTPRS
890	MSPI0406S00570855	EHBP1L1	2.38248e-06	0.263617	1	0.000304257	0.570939	-0.398948	1.55521	0	0	1			PTTG1
890	MSPI0406S00570855	FAM89B	2.38248e-06	0.263617	1	0.000304257	0.570939	-0.398948	1.55521	0	0	1			PUS7
890	MSPI0406S00570855	SSSCA1	2.38248e-06	0.263617	1	0.000304257	0.570939	-0.398948	1.55521	0	0	1			PVRIG
891	MSPI0406S00571311	SART1	1.25356e-07	3.23801e-05	7.9624e-07	3.27642e-06	0.788487	1.50043	0.98928	0	1	0			PXK
892	MSPI0406S00571424	GAL3ST3	7.41368e-07	3.0609e-05	0.00237221	1.94464e-07	1.4445	1.82101	2.04537	0	1	1			PYDC1
892	MSPI0406S00571424	SF3B2	7.41368e-07	3.0609e-05	0.00237221	1.94464e-07	1.4445	1.82101	2.04537	0	1	1			PYGM
893	MSPI0406S00571667	RIN1	2.33607e-09	0.19547	0.194206	2.15696e-07	0.460888	0.769731	1.57035	0	0	1			PYGO2
894	MSPI0406S00571678	B3GNT1	1.77169e-18	7.7515e-10	2.67456e-09	0	1.46326	2.32558	2.56751	0	1	1			QPCT
894	MSPI0406S00571678	BRMS1	1.77169e-18	7.7515e-10	2.67456e-09	0	1.46326	2.32558	2.56751	0	1	1			QPRT
895	MSPI0406S00571798	PELI3	5.57564e-09	0.00129738	0.00125496	1	0.978999	1.63905	-0.0548792	0	1	0			R3HCC1
896	MSPI0406S00571949	CCDC87	0.00103093	0.0014105	0.203266	0.000577815	1.25018	1.07782	1.53729	0	0	1			RAB26
896	MSPI0406S00571949	CCS	0.00103093	0.0014105	0.203266	0.000577815	1.25018	1.07782	1.53729	0	0	1			RAB34
897	MSPI0406S00572030	RBM4B	1.59495e-11	4.6274e-10	1.05131e-05	0.00625875	-1.57535	-1.71779	-0.797394	1	1	0			RAB37
898	MSPI0406S00572592	KDM2A	2.04627e-08	0.000875135	1	1	1.52326	-0.309108	-0.0398079	1	0	0			RAB39
899	MSPI0406S00572615	ADRBK1	4.49009e-08	6.28287e-05	0.000241501	3.68226e-08	0.962393	1.4695	1.51741	0	0	1			RAB3IL1
900	MSPI0406S00572803	PPP1CA	1.85513e-14	0.0627017	3.33291e-06	3.04529e-10	0.49573	1.7123	1.62666	0	1	1			RAB8B
901	MSPI0406S00573069	TBX10	2.78335e-08	0.119233	6.60401e-08	0.285672	0.451398	2.04795	0.417392	0	1	0			RAC1
902	MSPI0406S00573403	NDUFS8	2.99313e-05	0.0121143	1	0.000147505	0.886263	0.335803	1.52495	0	0	1			RAD51C
903	MSPI0406S00573670	LRP5	4.27804e-11	3.57681e-09	0.00690739	4.97048e-12	1.60227	1.29057	2.11135	1	0	1			RAET1E
904	MSPI0406S00574325	MRGPRD	9.01004e-05	0.00011419	0.972423	0.00761981	1.62358	0.484131	1.36578	1	0	0			RAG2
905	MSPI0406S00576747	DHCR7	1.26236e-12	6.22124e-11	1.0245e-05	0.0113239	-1.96998	-2.10078	-0.930699	1	1	0			RALYL
905	MSPI0406S00576747	NADSYN1	1.26236e-12	6.22124e-11	1.0245e-05	0.0113239	-1.96998	-2.10078	-0.930699	1	1	0			RAMP2
906	MSPI0406S00577945	RELT	3.45884e-10	4.9557e-05	7.4886e-07	0.878449	1.7879	3.50542	0.40594	1	1	0			RANBP1
907	MSPI0406S00578449	POLD3	7.70153e-08	0.291384	0.0744993	5.27532e-06	0.55391	1.28087	1.88125	0	0	1			RAP1GAP2
908	MSPI0406S00578573	SPCS2	9.70636e-13	1.40601e-07	0.00759245	1	1.73828	1.58179	0.142801	1	1	0			RAPGEF3
908	MSPI0406S00578573	XRRA1	9.70636e-13	1.40601e-07	0.00759245	1	1.73828	1.58179	0.142801	1	1	0			RASIP1
909	MSPI0406S00578957	GDPD5	2.77376e-06	0.0152034	2.88619e-06	0.20774	0.645592	1.83324	0.475397	0	1	0			RASL11B
910	MSPI0406S00579045	MAP6	9.02218e-08	4.6991e-06	0.00768336	0.397082	-1.60618	-1.65693	-0.556114	1	1	0			RASSF4
911	MSPI0406S00579425	PRKRIR	0.00598842	0.159856	0.00948142	0.0603769	0.686569	1.77408	0.959563	0	1	0			RBKS
912	MSPI0406S00579743	CAPN5	1.94465e-09	0.00378435	0.000408867	1.32968e-08	0.887222	1.79845	1.85376	0	1	1			RBM17
913	MSPI0406S00582722	C11orf75	6.59122e-16	1.9017e-07	1	1	2.02448	-0.0517087	-0.122323	1	0	0			RBM24
914	MSPI0406S00583311		6.64275e-11	1.12947e-08	1	0.000543496	1.57443	-0.116095	1.12886	1	0	0			RBM3
915	MSPI0406S00584980	RAB39	3.59784e-06	3.60612e-05	3.39685e-05	0.000611614	1.20285	2.20204	1.195	0	1	0			RBM47
916	MSPI0406S00585995	DLAT	8.60235e-19	4.04953e-13	1.11459e-08	0	-1.18354	-1.44928	-1.78558	0	0	1			RBM4B
917	MSPI0406S00588448		1.97449e-07	0.689031	1.85664e-05	0.0269631	0.311061	2.30126	0.916067	0	1	0			RBMS3
918	MSPI0406S00588449	FXYD2	4.03802e-14	0.22105	4.01638e-08	4.92121e-07	0.440152	2.36585	1.59351	0	1	1			RBP5
919	MSPI0406S00588546	TMPRSS13	2.06125e-15	8.98439e-14	5.38721e-06	0	1.69459	1.57915	2.12645	1	1	1			RDH5
920	MSPI0406S00588632	TMPRSS4	7.05218e-10	0.636735	0.000132668	9.19391e-05	0.33239	2.02221	1.53287	0	1	1			RECQL
921	MSPI0406S00589230	UPK2	5.83846e-09	2.84387e-07	0.0131058	8.90427e-10	1.30779	1.19132	1.78632	0	0	1			RECQL5
922	MSPI0406S00589445	NLRX1	1.00156e-07	6.25276e-06	0.000230547	0.208278	1.73864	2.38274	0.760281	1	1	0			REEP4
923	MSPI0406S00590245	OAF	2.35398e-15	0	2.16398e-06	4.80349e-12	2.82297	2.46313	2.52129	1	1	1			REL
924	MSPI0406S00590847	SORL1	1.19289e-10	1	0.0437489	0.000228098	0.202875	-1.8599	-2.04008	0	0	1			RELT
925	MSPI0406S00591444	HSPA8	3.82332e-18	0.0603559	0.0121768	4.50031e-05	0.74009	1.50538	-1.54968	0	0	1			REM2
926	MSPI0406S00591745	GRAMD1B	2.9069e-19	1.21205e-10	1.35479e-13	0	1.04729	2.08489	1.65823	0	1	1			RER1
927	MSPI0406S00591946	OR8B8	0.0014377	0.0169574	0.00408834	0.318175	0.799852	1.55045	0.523526	0	1	0			RFPL3
928	MSPI0406S00592002	SIAE	4.20926e-12	0.000333723	0.0041727	6.84126e-11	0.722335	0.986087	1.54253	0	0	1			RGS22
928	MSPI0406S00592002	SPA17	4.20926e-12	0.000333723	0.0041727	6.84126e-11	0.722335	0.986087	1.54253	0	0	1			RGS7BP
929	MSPI0406S00592027	ESAM	6.28324e-11	0.0199444	0.37065	8.47353e-10	0.800947	0.72812	2.1312	0	0	1			RGS9BP
929	MSPI0406S00592027	VSIG2	6.28324e-11	0.0199444	0.37065	8.47353e-10	0.800947	0.72812	2.1312	0	0	1			RHBDF2
930	MSPI0406S00593800	KCNJ5	4.05121e-09	0.094524	1.30913e-08	0.504989	0.498994	2.2551	0.348498	0	1	0			RHD
931	MSPI0406S00593859	TP53AIP1	4.62148e-08	0.000844518	8.63894e-07	2.10323e-06	0.677244	1.51615	1.0232	0	1	0			RHOA
932	MSPI0406S00593860	TP53AIP1	7.15339e-06	5.34967e-06	0.00541232	0.00207121	1.6078	1.86753	1.34947	1	1	0			RIN1
933	MSPI0406S00594300	APLP2	4.01549e-12	0.0186134	2.95202e-09	3.93002e-07	0.647384	2.39047	1.42637	0	1	0			RIN3
934	MSPI0406S00594562	ADAMTS15	2.4934e-07	0.00714514	0.000201585	1.65625e-06	0.700378	1.5152	1.29857	0	1	0			RIPK3
935	MSPI0406S00595708		0.00224852	0.0459632	0.00417491	0.0134584	0.765938	1.64374	1.02741	0	1	0			RNASE1
936	MSPI0406S00595723		1.18659e-06	0.000528225	4.75694e-05	0.350135	1.20025	2.14761	0.542594	0	1	0			RNASEK
937	MSPI0406S00595724		1.43087e-15	0	1.45865e-05	0	1.63785	1.30469	1.68885	1	0	1			RNASET2
938	MSPI0406S00595904		2.00102e-15	6.55917e-07	4.27657e-11	9.48353e-14	0.71659	1.50444	1.22804	0	1	0			RNF103
939	MSPI0406S00595958	ACAD8	0.000200777	0.207678	0.00254147	1	0.538636	1.66109	0.040425	0	1	0			RNF141
939	MSPI0406S00595958	THYN1	0.000200777	0.207678	0.00254147	1	0.538636	1.66109	0.040425	0	1	0			RNF213
940	MSPI0406S00598194		0.000128533	0.00868895	0.000192994	0.00331146	0.809301	1.74668	1.00589	0	1	0			RNF41
941	MSPI0406S00599486	GALNT8	5.25126e-05	0.000132221	0.000725863	0.0365666	1.30075	1.93112	0.922897	0	1	0			RNH1
942	MSPI0406S00600154	CD9	0.000982849	0.000996862	0.00676504	0.0241736	1.07645	1.50051	0.906705	0	1	0			RPH3AL
943	MSPI0406S00600313	TNFRSF1A	9.18385e-07	2.35331e-06	0.00223054	3.04523e-07	1.34185	1.50572	1.64235	0	1	1			RPIA
944	MSPI0406S00600314	TNFRSF1A	4.64879e-11	2.17476e-10	0.00045722	0.00553121	1.89136	1.79708	1.00638	1	1	0			RPL19
945	MSPI0406S00600622	LPAR5	2.02346e-08	0.00566655	2.89694e-08	0.00059638	0.905797	2.73517	1.23259	0	1	0			RPL23A
946	MSPI0406S00600646	ING4	8.3077e-07	0.709236	1	0.000186046	0.32933	-0.092878	1.51088	0	0	1			RPL32P3
947	MSPI0406S00600647	ING4	7.41563e-13	0.14373	0.2465	1.56551e-09	0.698022	1.01352	2.64721	0	0	1			RPN2
948	MSPI0406S00600675	C12orf53	0.000330156	0.0212581	0.00023752	0.0424377	0.882165	2.10343	0.925788	0	1	0			RPP21
949	MSPI0406S00600764	LAG3	6.9128e-09	0.990123	0.00709153	0.0144834	-0.198327	1.66747	1.06832	0	1	0			RPS19
949	MSPI0406S00600764	MLF2	6.9128e-09	0.990123	0.00709153	0.0144834	-0.198327	1.66747	1.06832	0	1	0			RPS6KL1
949	MSPI0406S00600764	PTMS	6.9128e-09	0.990123	0.00709153	0.0144834	-0.198327	1.66747	1.06832	0	1	0			RPUSD1
950	MSPI0406S00600820	GPR162	2.59694e-10	0.000591053	8.31441e-05	6.62806e-10	0.981838	1.80086	1.9368	0	1	1			RRAS2
951	MSPI0406S00600827	GPR162	0.00176569	0.51683	0.00224775	0.81049	0.366577	1.62586	0.311995	0	1	0			RSHL1
951	MSPI0406S00600827	LEPREL2	0.00176569	0.51683	0.00224775	0.81049	0.366577	1.62586	0.311995	0	1	0			RSRC2
952	MSPI0406S00600932	ATN1	1.25769e-09	4.5584e-10	0.000264196	1.45656e-09	1.51166	1.57713	1.66054	1	1	1			RTBDN
953	MSPI0406S00600933	ATN1	1.61854e-13	1.03242e-12	3.50894e-07	2.42133e-14	1.52703	1.71375	1.87227	1	1	1			RUFY4
954	MSPI0406S00601095	CLSTN3	1.63241e-14	2.47396e-13	0.0178255	1.32947e-14	1.40603	0.806095	1.68313	0	0	1			RUSC1
954	MSPI0406S00601095	RBP5	1.63241e-14	2.47396e-13	0.0178255	1.32947e-14	1.40603	0.806095	1.68313	0	0	1			RWDD2B
955	MSPI0406S00601096	CLSTN3	7.42664e-15	0	0.00110448	1.32947e-14	1.52161	1.03731	1.66586	1	0	1			RXRB
955	MSPI0406S00601096	RBP5	7.42664e-15	0	0.00110448	1.32947e-14	1.52161	1.03731	1.66586	1	0	1			RYK
956	MSPI0406S00601366	NANOG	2.29297e-17	1	1	2.6722e-10	0.102889	0.24741	2.12887	0	0	1			S100A1
957	MSPI0406S00601448	SLC2A14	2.46769e-05	1	0.270113	0.0049059	0.170859	1.27989	1.65664	0	0	1			S100A13
958	MSPI0406S00601872	CLEC4D	9.42978e-06	0.130632	1	0.000126768	0.675079	-0.0079917	1.59175	0	0	1			S100A14
959	MSPI0406S00603220	LOH12CR1	5.66369e-08	4.39104e-06	5.65053e-05	3.52006e-08	-1.16322	-1.69762	-1.57031	0	1	1			S100A16
959	MSPI0406S00603220	LOH12CR2	5.66369e-08	4.39104e-06	5.65053e-05	3.52006e-08	-1.16322	-1.69762	-1.57031	0	1	1			S100A2
960	MSPI0406S00603425	DDX47	5.70363e-10	8.02885e-05	0.000881251	5.0432e-10	1.13984	1.6368	2.06504	0	1	1			S100A3
961	MSPI0406S00605103	GOLT1B	6.66273e-08	0.219682	0.949603	2.53846e-06	-0.476124	-0.346385	-1.51887	0	0	1			S100PBP
961	MSPI0406S00605103	RECQL	6.66273e-08	0.219682	0.949603	2.53846e-06	-0.476124	-0.346385	-1.51887	0	0	1			S1PR3
962	MSPI0406S00606313	KLHDC5	1.42968e-05	0.00786601	0.30664	5.35728e-06	1.32826	1.16904	2.37351	0	0	1			S1PR5
963	MSPI0406S00609788	AMIGO2	1.05473e-11	2.58234e-12	0.0164869	1.09089e-05	1.59994	0.978223	1.12007	1	0	0			SAP30BP
963	MSPI0406S00609788	FAM113B	1.05473e-11	2.58234e-12	0.0164869	1.09089e-05	1.59994	0.978223	1.12007	1	0	0			SART1
964	MSPI0406S00609989	RAPGEF3	1.69116e-11	2.4943e-05	1.12767e-05	1.06452e-10	0.850382	1.44777	1.54741	0	0	1			SCAP
965	MSPI0406S00610021	RAPGEF3	3.58998e-13	1.35479e-13	0.000192282	7.61556e-13	2.24162	1.99134	2.35993	1	1	1			SCN10A
966	MSPI0406S00610022	RAPGEF3	4.01928e-16	0	2.85896e-06	0	2.85082	2.46559	3.14333	1	1	1			SCRN2
967	MSPI0406S00610045		9.06447e-09	0.000110668	0.662786	9.28991e-09	1.80747	0.814362	3.01275	1	0	1			SCT
968	MSPI0406S00610046		3.55976e-06	4.23446e-06	0.197979	5.9099e-06	1.65436	1.03516	1.8652	1	0	1			SDF4
969	MSPI0406S00610761	PRKAG1	2.64116e-05	0.000121305	0.311208	1.41369e-05	1.32964	0.860941	1.69798	0	0	1			SDSL
970	MSPI0406S00610953	TUBA1A	4.64939e-12	0.0271832	5.08209e-07	6.46674e-08	0.905995	2.9601	2.32181	0	1	1			SEC62
970	MSPI0406S00610953	TUBA1B	4.64939e-12	0.0271832	5.08209e-07	6.46674e-08	0.905995	2.9601	2.32181	0	1	1			SEL1L3
971	MSPI0406S00611047	PRPH	1.31293e-07	0.00119243	0.0146776	6.37311e-08	0.935871	1.23554	1.70633	0	0	1			SELENBP1
972	MSPI0406S00612485	BIN2	1.88613e-11	8.02133e-07	9.82e-06	6.31941e-12	0.947341	1.4635	1.52869	0	0	1			SEMA4C
973	MSPI0406S00612486	BIN2	1.92095e-07	3.33676e-07	0.022444	0.014056	1.83031	1.44028	1.08974	1	0	0			SEMA5A
974	MSPI0406S00612543	GALNT6	4.32184e-12	0.000173539	9.99954e-12	6.47161e-07	0.733752	2.12821	1.09351	0	1	0			SENP6
975	MSPI0406S00612840	GRASP	1.37666e-09	0.00187266	1	6.72541e-09	1.21351	0.364662	2.40491	0	0	1			SENP8
976	MSPI0406S00612841	GRASP	4.34882e-05	0.0738918	0.335109	9.54165e-05	0.73575	0.842077	1.59437	0	0	1			SEPT9
977	MSPI0406S00613026	KRT80	0.000272301	0.0043127	0.0233214	0.000135702	1.17902	1.61633	1.70365	0	0	1			SERINC2
978	MSPI0406S00613096	KRT81	9.50279e-09	1.23472e-09	6.30708e-05	5.17988e-07	-1.6043	-1.76333	-1.50257	1	1	1			SERPINA1
979	MSPI0406S00613215	KRT6A	1.65077e-06	0.000610316	0.000166357	3.10999e-06	1.0293	1.83573	1.52683	0	1	1			SERPINA10
980	MSPI0406S00613417	KRT78	4.25368e-07	2.95421e-05	0.000112008	5.97768e-07	1.10534	1.66486	1.45247	0	1	0			SERPINA4
981	MSPI0406S00613418	KRT78	0.000416826	0.00414655	0.00216691	0.00159244	1.05875	1.85131	1.30947	0	1	0			SERPINF1
982	MSPI0406S00613713	CSAD	1.26236e-12	5.70824e-13	4.80355e-07	5.74151e-06	-1.48093	-1.64153	-1.01761	0	1	0			SETBP1
982	MSPI0406S00613713	ZNF740	1.26236e-12	5.70824e-13	4.80355e-07	5.74151e-06	-1.48093	-1.64153	-1.01761	0	1	0			SF3B2
983	MSPI0406S00613860	AAAS	1.14578e-10	2.38568e-11	6.85509e-07	5.91331e-08	1.99925	2.4019	1.80364	1	1	1			SFRS15
984	MSPI0406S00614291	HOXC13	4.64816e-14	2.9196e-12	5.76893e-07	0	1.67296	1.83612	2.1422	1	1	1			SFT2D1
985	MSPI0406S00614989	BLOC1S1	0.000154608	0.000306213	0.254113	0.000143001	1.77527	1.283	2.15691	1	0	1			SFTA3
985	MSPI0406S00614989	RDH5	0.000154608	0.000306213	0.254113	0.000143001	1.77527	1.283	2.15691	1	0	1			SFTPC
986	MSPI0406S00615003	CD63	4.92432e-08	2.38901e-05	3.30485e-05	0.351561	1.43205	2.33534	0.566786	0	1	0			SGPL1
987	MSPI0406S00615425	OBFC2B	1.48584e-11	1.536e-06	1.68512e-05	3.0508e-12	0.970256	1.48195	1.59836	0	0	1			SGTA
987	MSPI0406S00615425	RNF41	1.48584e-11	1.536e-06	1.68512e-05	3.0508e-12	0.970256	1.48195	1.59836	0	0	1			SH2D3C
988	MSPI0406S00615431	OBFC2B	1.1379e-06	0.0862125	0.205796	5.30749e-06	0.652734	0.894899	1.63711	0	0	1			SH2D4B
988	MSPI0406S00615431	SLC39A5	1.1379e-06	0.0862125	0.205796	5.30749e-06	0.652734	0.894899	1.63711	0	0	1			SH3BP1
989	MSPI0406S00615432	OBFC2B	1.62053e-23	0.000599656	1.27146e-10	0	0.598305	1.7631	1.80046	0	1	1			SH3D20
989	MSPI0406S00615432	SLC39A5	1.62053e-23	0.000599656	1.27146e-10	0	0.598305	1.7631	1.80046	0	1	1			SH3GL3
990	MSPI0406S00616380	DDIT3	2.17611e-14	7.7606e-12	1.89858e-05	0	1.09127	1.10854	1.5045	0	0	1			SHANK1
990	MSPI0406S00616380	MBD6	2.17611e-14	7.7606e-12	1.89858e-05	0	1.09127	1.10854	1.5045	0	0	1			SHARPIN
991	MSPI0406S00616562	TSFM	5.0248e-06	0.0038456	1	7.76854e-06	1.27528	0.379626	2.09074	0	0	1			SHBG
992	MSPI0406S00616618	CTDSP2	1.3157e-17	2.17524e-12	0.682625	0.000759234	1.72192	-0.416845	0.952469	1	0	0			SHC2
993	MSPI0406S00617792	GNS	7.07629e-07	0.00520786	0.389885	4.07809e-07	1.27358	0.983964	2.41415	0	0	1			SHISA5
994	MSPI0406S00617866	WIF1	1.85647e-11	2.12826e-10	9.90118e-05	0.0228187	-2.2827	-2.2059	-0.996137	1	1	0			SHROOM1
995	MSPI0406S00618028		0.00623728	0.0562399	0.00620127	0.159737	0.693622	1.51595	0.653822	0	1	0			SIAE
996	MSPI0406S00618566	NUP107	6.5382e-18	2.26607e-11	0.923637	0.562343	2.50037	0.461762	0.48759	1	0	0			SIGLEC9
997	MSPI0406S00618640	MDM2	1.06952e-12	5.07733e-12	0.000387998	0.00579103	-2.82891	-2.35902	-1.3489	1	1	0			SIK1
998	MSPI0406S00622030	SOCS2	3.68508e-20	0	0.218465	8.83547e-09	2.15014	0.621917	1.45055	1	0	0			SIRT2
999	MSPI0406S00622186	PLXNC1	1.30908e-11	0.0446557	2.97438e-11	0.265897	0.734025	3.42601	0.581882	0	1	0			SIX5
1000	MSPI0406S00623057	ELK3	4.79661e-09	1.24691e-09	4.63686e-05	1.95678e-05	1.65809	1.89833	1.30673	1	1	0			SKA1
1001	MSPI0406S00624112	UTP20	2.97316e-10	7.06286e-11	0.000100634	3.20184e-05	1.60452	1.51333	1.13846	1	1	0			SKIL
1002	MSPI0406S00624790	NFYB	7.74733e-11	0.00313538	0.003724	2.10974e-10	0.729258	1.17693	1.64764	0	0	1			SLAMF1
1003	MSPI0406S00625258	APPL2	2.61296e-13	2.85576e-07	0.000125241	1	2.16696	2.74215	0.129347	1	1	0			SLAMF8
1004	MSPI0406S00626672	ACACB	1.54263e-06	1.2371e-06	0.000230356	0.00312937	2.09219	2.63212	1.53374	1	1	1			SLC16A3
1005	MSPI0406S00627009	MMAB	4.31971e-13	9.39645e-05	4.28269e-10	2.21792e-10	0.77944	1.96906	1.3888	0	1	0			SLC19A1
1005	MSPI0406S00627009	MVK	4.31971e-13	9.39645e-05	4.28269e-10	2.21792e-10	0.77944	1.96906	1.3888	0	1	0			SLC1A6
1006	MSPI0406S00627404	ANKRD13A	1.7889e-10	3.96832e-07	3.29121e-05	4.62494e-11	1.31075	1.94326	2.03686	0	1	1			SLC20A2
1006	MSPI0406S00627404	GIT2	1.7889e-10	3.96832e-07	3.29121e-05	4.62494e-11	1.31075	1.94326	2.03686	0	1	1			SLC22A11
1007	MSPI0406S00627850		1.97385e-16	0.00232566	0.0042569	2.42133e-14	0.585281	0.929361	1.66228	0	0	1			SLC23A1
1008	MSPI0406S00628051	MYL2	1.85969e-07	0.627463	0.0264163	7.42802e-05	0.363458	1.42946	1.57738	0	0	1			SLC25A42
1009	MSPI0406S00628495		1.11693e-05	1.42346e-05	0.519112	0.0485033	1.53899	0.721994	0.947359	1	0	0			SLC25A45
1010	MSPI0406S00629691		1.89851e-13	0.00586481	1.45102e-07	1.33221e-10	0.858806	2.60432	2.17493	0	1	1			SLC26A8
1011	MSPI0406S00629812	SDSL	8.93529e-09	1.05991e-07	0.0124237	5.24429e-09	1.46763	1.21651	1.83934	0	0	1			SLC27A2
1012	MSPI0406S00630363	TBX5	1.14863e-13	6.28356e-13	9.02933e-09	1.16948e-12	2.07234	2.59426	2.22896	1	1	1			SLC27A3
1013	MSPI0406S00630364	TBX5	8.12159e-16	0	1.55405e-09	0	2.03299	2.30228	2.23815	1	1	1			SLC29A3
1014	MSPI0406S00632198	VSIG10	6.99608e-20	0	2.28529e-07	6.98786e-14	2.36517	1.86318	2.0269	1	1	1			SLC2A14
1015	MSPI0406S00632359	SUDS3	9.90562e-14	3.14848e-08	6.9519e-07	3.40047e-14	1.20019	1.88044	1.95062	0	1	1			SLC2A8
1015	MSPI0406S00632359	TAOK3	9.90562e-14	3.14848e-08	6.9519e-07	3.40047e-14	1.20019	1.88044	1.95062	0	1	1			SLC30A3
1016	MSPI0406S00632580		2.75116e-09	7.26737e-07	1.43326e-06	5.5349e-09	1.8426	2.95151	2.47462	1	1	1			SLC39A5
1017	MSPI0406S00634098	P2RX4	4.89958e-08	0.252835	0.850487	9.00261e-07	0.554176	0.549158	1.97232	0	0	1			SLC39A7
1018	MSPI0406S00634771		5.00908e-06	0.0205503	4.20478e-06	0.0296267	0.742111	2.17787	0.816353	0	1	0			SLC47A2
1019	MSPI0406S00635068	MLXIP	3.18552e-05	9.24988e-05	0.00378104	0.110381	1.45663	1.85376	0.840454	0	1	0			SLU7
1020	MSPI0406S00635070	MLXIP	9.4043e-12	1.99391e-06	1.81615e-06	6.00623e-12	1.24106	2.00197	2.01509	0	1	1			SLURP1
1021	MSPI0406S00635071	MLXIP	5.46271e-11	0.00314711	2.84622e-05	8.28587e-10	0.870617	1.89423	1.90806	0	1	1			SMARCB1
1022	MSPI0406S00635408	KNTC1	2.0382e-17	3.70302e-05	1.29267e-05	0	-0.795731	-1.34179	-1.85629	0	0	1			SMCHD1
1022	MSPI0406S00635408	RSRC2	2.0382e-17	3.70302e-05	1.29267e-05	0	-0.795731	-1.34179	-1.85629	0	0	1			SMPD3
1023	MSPI0406S00635827		0.000236497	0.000234546	0.00267199	0.00336136	1.21766	1.69708	1.15703	0	1	0			SMPX
1024	MSPI0406S00636017	PITPNM2	4.85653e-09	1.41641e-09	0.000199078	0.000191687	1.70954	1.75478	1.21927	1	1	0			SMTN
1025	MSPI0406S00640774		4.22166e-08	0.00100502	1.20099e-07	0.180489	1.18423	2.88127	0.693441	0	1	0			SMYD5
1026	MSPI0406S00640775		1.29774e-10	6.22674e-05	6.23659e-11	0.00442105	0.655608	1.72653	0.560371	0	1	0			SNAI3
1027	MSPI0406S00640792		4.57981e-10	0.508175	1.22522e-05	0.000283013	0.424456	2.53313	1.64806	0	1	1			SNCG
1028	MSPI0406S00642309	FBRSL1	5.00988e-09	9.33524e-08	0.000640968	0.0848209	-1.8406	-2.0032	-0.804942	1	1	0			SNORA67
1029	MSPI0406S00647380	FLT3	1.98551e-21	1	1	1.83653e-12	0.0319855	-0.203001	1.9309	0	0	1			SNORA7B
1030	MSPI0406S00647381	FLT3	7.27384e-28	0.868318	0.858737	0	0.202165	0.377416	2.81568	0	0	1			SNORD123
1031	MSPI0406S00648859	BRCA2	1.04932e-07	0.440337	1	2.38293e-05	0.595969	-0.307864	2.20151	0	0	1			SNORD36A
1031	MSPI0406S00648859	ZAR1L	1.04932e-07	0.440337	1	2.38293e-05	0.595969	-0.307864	2.20151	0	0	1			SNORD36B
1032	MSPI0406S00652217	C13orf18	2.70831e-13	6.08724e-11	0.034446	8.73908e-14	1.28478	0.764962	1.67929	0	0	1			SNORD36C
1033	MSPI0406S00652674		3.79203e-18	0	0.000783552	0.00331329	3.84858	2.59268	1.6187	1	1	1			SNORD42A
1034	MSPI0406S00652675		6.79442e-12	1.20013e-05	1	1	2.71045	0.0747077	-0.120091	1	0	0			SNORD42B
1035	MSPI0406S00653171	TRIM13	0.00143267	0.0734499	1	0.00758081	0.973453	-0.1786	1.52211	0	0	1			SNORD4A
1036	MSPI0406S00654621	PCDH17	8.89121e-11	2.82411e-07	0.647065	1.21883e-10	1.06805	0.372749	1.52448	0	0	1			SNTB1
1037	MSPI0406S00655080	PCDH20	2.82513e-10	2.18578e-07	9.23026e-06	3.56009e-11	1.12767	1.50914	1.57882	0	1	1			SOCS2
1038	MSPI0406S00659991	FARP1	5.70415e-16	6.42951e-14	1.71789e-08	0	1.83073	2.09877	2.30862	1	1	1			SOD1
1039	MSPI0406S00660162		6.66504e-08	9.75174e-06	5.16195e-05	6.5583e-08	1.02227	1.64831	1.42218	0	1	0			SORBS3
1040	MSPI0406S00661059	ZIC5	0.000518168	0.0084023	0.0659155	0.000162598	-1.24389	-1.56532	-1.8769	0	0	1			SORL1
1041	MSPI0406S00664052	C13orf29	3.51105e-06	0.946248	0.00788502	0.0025481	0.199382	1.53236	1.18453	0	1	0			SOST
1042	MSPI0406S00666014		1.86375e-07	0.00110025	0.00757592	1.22769e-07	1.48482	2.12694	2.68872	0	1	1			SOSTDC1
1043	MSPI0406S00666015		1.31621e-06	0.0322256	0.0398145	2.68802e-06	1.13406	1.81135	2.48156	0	0	1			SOX15
1044	MSPI0406S00666072	ADPRHL1	4.15411e-10	3.20465e-11	6.95521e-06	2.61307e-07	1.90295	2.07066	1.65405	1	1	1			SP100
1045	MSPI0406S00666497	FAM70B	3.44532e-15	5.92346e-13	9.46937e-12	4.27828e-14	1.29416	1.93825	1.53963	0	1	1			SP8
1046	MSPI0406S00666849		4.55544e-05	3.37971e-05	0.29678	0.0335486	1.83785	1.11529	1.21492	1	0	0			SPA17
1047	MSPI0406S00667713	RNASE1	0.00228487	0.0118739	0.00351585	0.0716533	0.847045	1.57639	0.75988	0	1	0			SPAG7
1048	MSPI0406S00668645	REM2	0.00175623	0.486434	0.00200272	0.368313	0.378976	1.63341	0.505453	0	1	0			SPAG8
1049	MSPI0406S00668743	JUB	0.000237089	9.73775e-05	0.00847672	0.00133383	1.58181	1.90404	1.55474	1	1	1			SPATA1
1050	MSPI0406S00668793	PSMB5	2.04236e-15	1	0.274817	3.16669e-09	0.133078	0.836928	2.1336	0	0	1			SPATA24
1051	MSPI0406S00668794	PSMB5	1.1817e-11	0.0520188	0.0265875	2.4311e-10	0.553598	1.21073	1.91339	0	0	1			SPCS2
1052	MSPI0406S00668977	BCL2L2	1.84094e-07	4.85717e-08	0.00544001	1.13008e-06	1.8993	1.69784	1.87606	1	1	1			SPEN
1052	MSPI0406S00668977	HOMEZ	1.84094e-07	4.85717e-08	0.00544001	1.13008e-06	1.8993	1.69784	1.87606	1	1	1			SPIB
1052	MSPI0406S00668977	PABPN1	1.84094e-07	4.85717e-08	0.00544001	1.13008e-06	1.8993	1.69784	1.87606	1	1	1			SPNS2
1053	MSPI0406S00669039	CMTM5	0.00258604	0.0225925	0.154494	0.00104733	1.03422	1.23407	1.56528	0	0	1			SPOCD1
1053	MSPI0406S00669039	IL25	0.00258604	0.0225925	0.154494	0.00104733	1.03422	1.23407	1.56528	0	0	1			SPOCK1
1054	MSPI0406S00669185	THTPA	1.54572e-09	0.000214902	0.000190701	2.18445e-09	0.863051	1.43219	1.5581	0	0	1			SPPL2B
1055	MSPI0406S00669380	LRRC16B	5.57616e-06	0.118022	8.72625e-05	0.0014511	0.541109	1.79458	1.04989	0	1	0			SPTAN1
1056	MSPI0406S00669469	FAM158A	1.30293e-16	1.15816e-10	4.5371e-07	0	1.6887	2.10454	2.6977	1	1	1			SPTBN4
1056	MSPI0406S00669469	PSME2	1.30293e-16	1.15816e-10	4.5371e-07	0	1.6887	2.10454	2.6977	1	1	1			SPTBN5
1057	MSPI0406S00669635	CIDEB	7.88135e-14	6.42951e-14	5.91638e-07	6.14041e-14	1.37741	1.41587	1.52621	0	0	1			SREBF1
1057	MSPI0406S00669635	LTB4R	7.88135e-14	6.42951e-14	5.91638e-07	6.14041e-14	1.37741	1.41587	1.52621	0	0	1			SRGAP3
1057	MSPI0406S00669635	LTB4R2	7.88135e-14	6.42951e-14	5.91638e-07	6.14041e-14	1.37741	1.41587	1.52621	0	0	1			SRGN
1058	MSPI0406S00669665	ADCY4	3.34281e-12	7.1674e-11	0.0249808	1.60195e-12	1.34876	0.849806	1.69312	0	0	1			SRRD
1058	MSPI0406S00669665	RIPK3	3.34281e-12	7.1674e-11	0.0249808	1.60195e-12	1.34876	0.849806	1.69312	0	0	1			SSH2
1059	MSPI0406S00669736	CBLN3	3.06896e-07	1.1951e-05	0.736718	0.288387	-1.78817	-0.657746	-0.723743	1	0	0			SSPO
1059	MSPI0406S00669736	KIAA0323	3.06896e-07	1.1951e-05	0.736718	0.288387	-1.78817	-0.657746	-0.723743	1	0	0			SSR1
1060	MSPI0406S00669737	CBLN3	8.87212e-11	3.28669e-07	1	0.340611	-1.57205	-0.0536142	-0.521652	1	0	0			SSSCA1
1060	MSPI0406S00669737	KIAA0323	8.87212e-11	3.28669e-07	1	0.340611	-1.57205	-0.0536142	-0.521652	1	0	0			SSTR2
1061	MSPI0406S00672342	NKX2-1	0.0063584	0.740521	0.00951981	0.551448	-0.297421	-1.50801	-0.446978	0	1	0			SSTR4
1061	MSPI0406S00672342	SFTA3	0.0063584	0.740521	0.00951981	0.551448	-0.297421	-1.50801	-0.446978	0	1	0			SSX2IP
1062	MSPI0406S00672385		3.76732e-05	0.0205671	0.139889	2.68276e-05	0.812633	1.0965	1.55643	0	0	1			ST6GALNAC3
1063	MSPI0406S00673145	LRFN5	4.33266e-12	1.34486e-11	1.37351e-06	0.000445788	-2.16294	-2.40553	-1.31072	1	1	0			ST6GALNAC4
1064	MSPI0406S00674273	ARF6	8.45482e-08	0.217371	1	1.07906e-05	0.506052	-0.183866	1.51071	0	0	1			ST8SIA2
1065	MSPI0406S00675220	STYX	4.06747e-11	1.24196e-09	0.000148945	0.0374442	-1.86432	-1.99361	-0.83709	1	1	0			STARD5
1066	MSPI0406S00675244	GNPNAT1	1.03213e-11	6.05696e-06	0.235628	8.79336e-12	2.08854	1.26902	3.68601	1	0	1			STIM2
1067	MSPI0406S00675612	GMFB	5.12407e-16	0	3.30184e-09	0	1.5226	1.7472	1.79452	1	1	1			STK38
1068	MSPI0406S00677327	PRKCH	1.48977e-06	0.183145	0.000897246	1	1.10668	3.6747	-0.393253	0	1	0			STOML1
1069	MSPI0406S00678308	ZBTB1	5.65274e-10	9.55787e-09	0.000135977	0.019358	-1.43998	-1.55397	-0.731818	0	1	0			STX17
1069	MSPI0406S00678308	ZBTB25	5.65274e-10	9.55787e-09	0.000135977	0.019358	-1.43998	-1.55397	-0.731818	0	1	0			STYX
1070	MSPI0406S00678757		5.67735e-07	3.43169e-07	7.99772e-05	0.000375139	1.92158	2.50246	1.58504	1	1	1			SUDS3
1071	MSPI0406S00678758		2.23626e-11	1.27444e-11	3.93713e-08	1.85604e-08	2.76994	3.55696	2.5591	1	1	1			SURF1
1072	MSPI0406S00679968		1.72735e-15	0.132718	4.31466e-06	1.07787e-10	0.410028	1.59302	1.58685	0	1	1			SURF2
1073	MSPI0406S00681677	NUMB	8.19295e-07	6.00174e-06	1	0.0202473	1.8829	0.281603	1.23458	1	0	0			SYCP1
1074	MSPI0406S00682704	RPS6KL1	2.00654e-12	3.19327e-08	6.34749e-05	1.67876e-13	1.20311	1.42518	1.89322	0	0	1			SYMPK
1075	MSPI0406S00686431	FOXN3	2.12298e-16	2.27174e-06	1	0.54089	1.60623	-0.0602069	-0.471233	1	0	0			SYN2
1076	MSPI0406S00686551	PRO1768	1.02517e-12	6.36241e-10	2.93285e-09	2.77436e-11	0.983962	1.50666	1.2894	0	1	0			SYNE1
1077	MSPI0406S00686827	PSMC1	2.40855e-11	1.48535e-07	1.88403e-06	9.51486e-12	1.19944	1.76548	1.81449	0	1	1			SYNGAP1
1078	MSPI0406S00687378		2.15875e-13	1.21149e-09	1	0.0122915	2.98191	-0.170721	1.50271	1	0	0			SYNGR1
1079	MSPI0406S00688322	RIN3	0.00464147	0.109288	0.00841643	0.763624	-1.45032	-3.42093	-0.780799	0	1	0			SYNJ2
1080	MSPI0406S00688501		1.05473e-11	0.485814	0.0927018	5.72971e-08	0.366482	1.01261	1.85118	0	0	1			SYPL1
1081	MSPI0406S00689173	OTUB2	1.93728e-11	6.6925e-06	1.42107e-10	9.2597e-08	1.07164	2.48078	1.38427	0	1	0			SYTL1
1082	MSPI0406S00689273	PPP4R4	3.03618e-09	8.10853e-09	5.70935e-05	0.00495091	-1.33664	-1.59082	-0.794929	0	1	0			SYTL3
1083	MSPI0406S00689297	SERPINA10	2.60602e-13	6.42951e-14	3.63816e-08	6.98824e-11	2.08955	2.41801	1.94879	1	1	1			TACR3
1084	MSPI0406S00689298	SERPINA10	5.57319e-09	4.22663e-09	2.04296e-06	7.81089e-07	1.75974	2.27029	1.6958	1	1	1			TADA2B
1085	MSPI0406S00689341	SERPINA1	2.90727e-08	0.00013329	0.00482425	9.83032e-09	1.15452	1.47361	1.95789	0	0	1			TAF3
1086	MSPI0406S00689342	SERPINA1	5.56463e-07	7.99928e-07	0.0712849	3.97414e-07	1.35965	0.990585	1.59972	0	0	1			TAF6
1087	MSPI0406S00689416	SERPINA4	4.44643e-07	2.32038e-06	0.000238986	0.0163499	1.45407	1.82239	0.908332	0	1	0			TAOK3
1088	MSPI0406S00689967		2.23787e-09	0.22883	1	1.87846e-06	-0.542962	0.22307	-1.8101	0	0	1			TAP1
1089	MSPI0406S00691894		2.18027e-11	0.000307042	2.97438e-11	1.62184e-06	0.79048	2.27806	1.16141	0	1	0			TAP2
1090	MSPI0406S00692287	DEGS2	3.76265e-07	0.683513	1.07751e-05	0.0445992	0.237703	1.74237	0.645468	0	1	0			TARS
1091	MSPI0406S00692288	DEGS2	2.2959e-06	0.0594755	2.91173e-06	0.0115172	0.516966	1.76111	0.733998	0	1	0			TATDN2/GHRLOS_fusion
1092	MSPI0406S00692497	WDR25	9.42258e-06	0.0362968	0.0021281	4.37272e-05	0.814837	1.77679	1.58031	0	1	1			TBC1D13
1093	MSPI0406S00692498	WDR25	1.22406e-05	0.000256256	0.00010553	0.00644538	0.967552	2.22888	0.941736	0	1	0			TBC1D24
1094	MSPI0406S00692988		8.78165e-07	0.318707	9.06061e-06	0.0136265	0.345674	1.68221	0.725479	0	1	0			TBC1D29
1095	MSPI0406S00693058		0.00118064	0.00564113	0.00228889	0.0330228	0.940707	1.67603	0.877422	0	1	0			TBC1D8B
1096	MSPI0406S00693654	PPP2R5C	0.000670893	0.0219222	0.00769115	0.841852	-1.46662	-2.70533	-0.555927	0	1	0			TBCB
1097	MSPI0406S00693797	DYNC1H1	3.05624e-08	4.82994e-05	0.0168658	4.93031e-09	1.19487	1.25502	1.91203	0	0	1			TBX10
1098	MSPI0406S00695479	KLC1	3.6248e-21	2.27127e-11	1.32769e-11	0	1.51575	2.47528	2.66459	1	1	1			TBX21
1099	MSPI0406S00695480	KLC1	1.12886e-11	6.25158e-06	4.08404e-05	5.78747e-12	1.08009	1.58827	1.87523	0	1	1			TBX5
1100	MSPI0406S00696276		1.55718e-06	0.424102	0.0018311	0.000630664	0.42932	1.74607	1.32676	0	1	0			TBX6
1101	MSPI0406S00696643	INF2	1.0451e-05	0.000130663	0.000343161	0.123289	-0.978903	-1.52237	-0.566036	0	1	0			TCP11
1102	MSPI0406S00696953		8.48873e-07	1.06477e-05	0.455159	0.139079	1.56861	0.753364	0.754291	1	0	0			TCTA
1103	MSPI0406S00697029	C14orf79	1.16743e-06	9.18244e-07	0.000750542	5.76422e-06	1.15419	1.50951	1.25648	0	1	0			TEKT2
1104	MSPI0406S00697068	CDCA4	2.15423e-09	2.98006e-07	1	2.903e-06	1.56895	0.0586799	1.7371	1	0	1			TERT
1105	MSPI0406S00697331		1.23973e-11	0.00174933	2.97288e-10	6.68132e-07	1.16803	3.65369	1.96721	0	1	1			TEX14
1106	MSPI0406S00698202		3.70315e-10	0.00515792	0.00220721	1.43179e-09	0.75591	1.34154	1.71547	0	0	1			TEX264
1107	MSPI0406S00698342		2.37308e-10	0.206135	6.08973e-05	7.14423e-07	0.695785	2.74368	2.29868	0	1	1			TF
1108	MSPI0406S00699417	CYFIP1	6.27999e-10	0.385842	1.08295e-06	0.000226027	0.293933	1.69285	0.934354	0	1	0			TFAP2B
1109	MSPI0406S00703260	MTMR10	1.38737e-11	7.923e-07	0.00772405	1	2.41932	2.31431	0.230365	1	1	0			TFCP2L1
1110	MSPI0406S00703505	KLF13	5.84165e-15	0.00972969	0.00127218	1.11598e-12	0.994476	1.98517	2.9296	0	1	1			TFF3
1111	MSPI0406S00703785		3.10999e-05	0.000655831	0.00315117	0.41978	1.24453	1.87418	0.55565	0	1	0			TFPI2
1112	MSPI0406S00705968	PAK6	6.52361e-07	0.0723316	0.393301	2.47726e-06	0.668073	0.720522	1.66142	0	0	1			TFR2
1113	MSPI0406S00706182	BAHD1	1.15319e-07	0.122028	0.00825989	3.33412e-06	0.68098	1.65651	1.85139	0	1	1			TGIF2LX
1114	MSPI0406S00706789	INO80	1.48782e-13	1.24454e-11	3.65817e-05	0.0165362	-1.9185	-1.83632	-0.805731	1	1	0			TGIF2LY
1115	MSPI0406S00707381	JMJD7	1.37372e-08	7.67208e-09	2.88377e-05	0.000502256	-1.44519	-1.67663	-1.01024	0	1	0			TGM2
1115	MSPI0406S00707381	JMJD7-PLA2G4B	1.37372e-08	7.67208e-09	2.88377e-05	0.000502256	-1.44519	-1.67663	-1.01024	0	1	0			TGM6
1116	MSPI0406S00707471	SPTBN5	4.70388e-13	6.82782e-11	5.93467e-06	0.0376258	2.27997	2.55338	0.951042	1	1	0			THAP11
1117	MSPI0406S00707472	SPTBN5	2.56086e-07	2.29717e-06	2.91173e-06	6.21311e-06	1.47263	2.34657	1.58562	0	1	1			THOC6
1118	MSPI0406S00707834	HAUS2	0.00016215	0.0022506	0.0113452	0.161042	2.30121	2.68797	1.39421	1	0	0			THOP1
1118	MSPI0406S00707834	LRRC57	0.00016215	0.0022506	0.0113452	0.161042	2.30121	2.68797	1.39421	1	0	0			THTPA
1119	MSPI0406S00708275	MAP1A	9.823e-10	0.000374763	0.00015809	9.55078e-10	1.11204	1.8728	2.05217	0	1	1			THYN1
1120	MSPI0406S00710014	SLC27A2	3.09668e-17	8.98439e-14	7.39261e-07	0.0100578	2.22456	2.2499	0.893022	1	1	0			TIGD3
1121	MSPI0406S00710015	SLC27A2	8.95936e-18	8.99719e-13	1.49802e-05	0.179363	1.94826	1.83515	0.533046	1	1	0			TK2
1122	MSPI0406S00710190	USP50	1.8155e-06	8.83506e-05	0.63711	0.456522	2.31255	1.02539	0.847188	1	0	0			TLK2
1123	MSPI0406S00712774	MYO1E	1.81888e-09	2.7019e-07	0.00185561	4.09504e-10	-1.33209	-1.30347	-1.69249	0	0	1			TM4SF19
1124	MSPI0406S00712891	GCNT3	2.81141e-12	2.5591e-06	8.48006e-07	4.31018e-12	0.957436	1.60357	1.63114	0	1	1			TMC3
1125	MSPI0406S00714161	RAB8B	8.42288e-05	0.0509282	0.17981	0.00011104	-0.749571	-0.968555	-1.50443	0	0	1			TMEM105
1126	MSPI0406S00714908	OAZ2	1.82622e-19	0	9.22588e-10	2.33031e-10	-1.95982	-1.87707	-1.36122	1	1	0			TMEM108
1127	MSPI0406S00715261	PDCD7	0.000428905	0.0042628	0.00732607	0.443044	-1.1846	-1.79927	-0.577508	0	1	0			TMEM115
1128	MSPI0406S00715318	CILP	0.000170168	0.169727	0.00790267	0.00155075	0.64073	1.6726	1.3474	0	1	0			TMEM127
1129	MSPI0406S00717527	PAQR5	7.08516e-05	0.00376066	0.000701512	0.000242419	0.951064	1.77838	1.31092	0	1	0			TMEM184B
1130	MSPI0406S00718747	MYO9A	6.47141e-05	0.925287	1	0.00224333	-0.307161	-0.474116	-1.66233	0	0	1			TMEM198
1130	MSPI0406S00718747	SENP8	6.47141e-05	0.925287	1	0.00224333	-0.307161	-0.474116	-1.66233	0	0	1			TMEM204
1131	MSPI0406S00719471	LOXL1	0.000279263	0.000765828	0.00153071	0.00150471	1.25026	1.96293	1.35078	0	1	0			TMEM220
1132	MSPI0406S00719516	PML	1.78295e-19	2.47396e-13	1.21829e-10	0	1.50503	2.05894	2.29841	1	1	1			TMEM223
1132	MSPI0406S00719516	STOML1	1.78295e-19	2.47396e-13	1.21829e-10	0	1.50503	2.05894	2.29841	1	1	1			TMEM65
1133	MSPI0406S00719897	UBL7	7.47477e-09	0.000412837	0.0138234	3.79483e-09	-0.869759	-1.0816	-1.63032	0	0	1			TMEM80
1134	MSPI0406S00720969	DNM1P35	9.89596e-17	3.61439e-09	1.8397e-06	0	1.23658	1.61481	2.16629	0	1	1			TMEM95
1135	MSPI0406S00720970	DNM1P35	5.82727e-22	0.0323496	0.015525	0	0.705976	1.28641	2.94158	0	0	1			TMPRSS13
1136	MSPI0406S00721020	UBE2Q2	8.92441e-18	0	4.43509e-09	3.64734e-11	-1.50909	-1.46073	-1.13555	1	0	0			TMPRSS4
1137	MSPI0406S00721391	PSTPIP1	4.20769e-13	7.65701e-08	1	5.48323e-10	1.48588	-0.20542	1.99222	0	0	1			TMSB15B
1138	MSPI0406S00721392	PSTPIP1	1.23424e-11	9.38679e-05	0.721073	8.86049e-09	1.0187	-0.423961	1.66092	0	0	1			TNF
1139	MSPI0406S00721452	TSPAN3	0.000154395	0.000285776	0.000837788	0.00638075	1.23568	1.87734	1.12333	0	1	0			TNFRSF12A
1140	MSPI0406S00721666		0.000155802	0.00270842	0.0015874	0.000353487	0.954637	1.60828	1.24058	0	1	0			TNFRSF1A
1141	MSPI0406S00722177	ACSBG1	4.31645e-12	4.01038e-07	1	0.860534	2.05775	0.00228196	0.38587	1	0	0			TNFRSF1B
1142	MSPI0406S00722248	CRABP1	7.02757e-06	1.30905e-05	0.0124583	7.51038e-06	1.65995	1.63064	1.83459	1	0	1			TNIP1
1143	MSPI0406S00722977	MTHFS	5.65886e-20	2.87516e-11	0.0004687	1	2.43356	2.0856	0.0276965	1	1	0			TNNI3
1144	MSPI0406S00723575	STARD5	2.63609e-07	0.00559742	0.0272146	2.03472e-07	0.994264	1.36528	1.9677	0	0	1			TNRC4
1145	MSPI0406S00723589	TMC3	1.53946e-10	1.03691e-06	2.97987e-06	5.93906e-11	0.982561	1.52987	1.49177	0	1	0			TNS1
1146	MSPI0406S00724445	HOMER2	0.000318435	0.00113494	0.00837427	0.000252682	1.11081	1.54848	1.39587	0	1	0			TNS4
1147	MSPI0406S00724506	BTBD1	0.000273789	0.00188966	0.0578738	9.64294e-05	1.34292	1.50147	1.84415	0	0	1			TOB2
1148	MSPI0406S00724664	SH3GL3	5.56756e-19	1.94867e-14	1.64073e-10	0	1.59736	2.0464	2.25763	1	1	1			TOP1MT
1149	MSPI0406S00724727	ADAMTSL3	1.32545e-05	0.0924212	4.73182e-05	0.00495199	0.709086	2.29885	1.18851	0	1	0			TOP2B
1150	MSPI0406S00724968	UBE2QP1	0.00272516	0.0411882	0.00745905	0.614979	-1.01402	-2.0363	-0.54371	0	1	0			TOPBP1
1151	MSPI0406S00726529	HAPLN3	1.85513e-14	7.76016e-07	1.51548e-07	4.27828e-14	0.918286	1.64091	1.62978	0	1	1			TOR2A
1152	MSPI0406S00727038	KIF7	1.53262e-21	0	1.13802e-12	0	1.70698	1.6777	1.51995	1	1	1			TP53AIP1
1153	MSPI0406S00727462	IDH2	4.60688e-08	0.0447046	1.1269e-07	0.00593158	0.485491	1.8117	0.705513	0	1	0			TP53I11
1154	MSPI0406S00727463	IDH2	1.68032e-11	0.110792	2.19596e-09	0.000118204	0.397053	1.97809	0.889679	0	1	0			TPP1
1155	MSPI0406S00727630	NGRN	5.87638e-13	1.45761e-11	1	1.89503e-08	1.59994	0.238277	1.50034	1	0	1			TPRG1L
1156	MSPI0406S00727791	CRTC3	1.06162e-10	3.45471e-11	5.12584e-05	2.24289e-10	1.79029	1.93556	1.94426	1	1	1			TRABD
1157	MSPI0406S00728691	ST8SIA2	1.85994e-07	1.39916e-06	0.0421846	4.14407e-08	1.23442	1.11207	1.6522	0	0	1			TRAF3IP2
1158	MSPI0406S00728692	ST8SIA2	3.1339e-10	9.63335e-10	0.000697308	1.92565e-10	1.52676	1.39838	1.82947	1	0	1			TRAPPC1
1159	MSPI0406S00732012		7.92007e-19	2.6377e-10	1.1482e-10	0	1.54232	2.55292	2.62926	1	1	1			TRAPPC5
1160	MSPI0406S00733705	MRPL28	1.14115e-07	0.995053	3.5345e-05	0.028205	0.149863	1.80798	0.754988	0	1	0			TREML1
1161	MSPI0406S00734306	CHTF18	3.46216e-25	0	1.36006e-07	1.52398e-05	-2.41031	-1.83736	-1.13302	1	1	0			TRIM13
1161	MSPI0406S00734306	MSLNL	3.46216e-25	0	1.36006e-07	1.52398e-05	-2.41031	-1.83736	-1.13302	1	1	0			TRIM35
1161	MSPI0406S00734306	RPUSD1	3.46216e-25	0	1.36006e-07	1.52398e-05	-2.41031	-1.83736	-1.13302	1	1	0			TRIM72
1162	MSPI0406S00734835	CACNA1H	1.25382e-15	0	1.13255e-08	3.40047e-14	1.88317	1.99991	1.90835	1	1	1			TRIP10
1163	MSPI0406S00735164	C16orf42	3.49699e-08	0.183397	0.216837	1.02862e-06	0.599392	0.95694	1.88515	0	0	1			TRMT2A
1163	MSPI0406S00735164	GNPTG	3.49699e-08	0.183397	0.216837	1.02862e-06	0.599392	0.95694	1.88515	0	0	1			TRPC5
1164	MSPI0406S00735460	TMEM204	3.40382e-10	3.74168e-09	0.000100453	0.0258613	1.8855	2.05324	0.92787	1	1	0			TRPM2
1165	MSPI0406S00735606		6.68396e-13	0.0828468	0.711112	2.2652e-10	0.721436	0.577529	2.47943	0	0	1			TRRAP
1166	MSPI0406S00736133	NTHL1	5.83272e-13	9.00451e-12	0.00431019	0.00380013	1.62735	1.15275	0.829898	1	0	0			TSC2
1166	MSPI0406S00736133	TSC2	5.83272e-13	9.00451e-12	0.00431019	0.00380013	1.62735	1.15275	0.829898	1	0	0			TSFM
1167	MSPI0406S00736306	RAB26	6.88802e-08	0.040522	0.00144393	1.2923e-06	0.757594	1.79644	1.75574	0	1	1			TSPAN3
1168	MSPI0406S00736307	RAB26	2.97757e-08	0.00317118	0.000231537	1.04726e-07	0.870147	1.68685	1.66166	0	1	1			TSTA3
1169	MSPI0406S00736714	NTN3	1.11467e-14	1.8534e-06	2.17137e-06	5.22989e-14	1.14138	1.88865	2.17847	0	1	1			TTC23L
1170	MSPI0406S00736715	NTN3	1.50682e-17	0.00375783	5.7981e-06	3.40047e-14	0.85169	2.14662	2.46736	0	1	1			TTLL1
1170	MSPI0406S00736715	TBC1D24	1.50682e-17	0.00375783	5.7981e-06	3.40047e-14	0.85169	2.14662	2.46736	0	1	1			TTLL9
1171	MSPI0406S00736787	AMDHD2	3.26443e-11	6.41097e-11	6.47346e-06	7.44899e-05	-1.65318	-1.77593	-1.11418	1	1	0			TTYH3
1171	MSPI0406S00736787	ATP6V0C	3.26443e-11	6.41097e-11	6.47346e-06	7.44899e-05	-1.65318	-1.77593	-1.11418	1	1	0			TUB
1172	MSPI0406S00736907	LOC652276	3.60612e-12	0.000731997	5.95003e-06	9.4079e-11	1.10076	2.38168	2.34256	0	1	1			TUBA1A
1173	MSPI0406S00737108	LOC100128788	1.01878e-12	8.75546e-07	4.59202e-12	3.20664e-09	0.93269	2.13214	1.27268	0	1	0			TUBA1B
1174	MSPI0406S00737194	PRSS21	2.18529e-06	0.000223098	2.70256e-05	0.000145205	1.00531	1.96265	1.18381	0	1	0			TUBA4A
1175	MSPI0406S00737218	ZG16B	2.09714e-10	0.000412331	2.85559e-10	1.84822e-05	0.656788	1.84635	0.894598	0	1	0			TUBA4B
1176	MSPI0406S00737402	KREMEN2	1.82806e-06	0.000110473	0.0312536	0.641611	-1.77398	-1.79642	-0.552927	1	0	0			TUBB
1176	MSPI0406S00737402	PAQR4	1.82806e-06	0.000110473	0.0312536	0.641611	-1.77398	-1.79642	-0.552927	1	0	0			TUBB2C
1177	MSPI0406S00737477	HCFC1R1	1.0811e-08	4.68445e-07	0.00124864	0.219235	-1.97164	-2.14244	-0.75276	1	1	0			TULP2
1177	MSPI0406S00737477	THOC6	1.0811e-08	4.68445e-07	0.00124864	0.219235	-1.97164	-2.14244	-0.75276	1	1	0			TXNRD2
1177	MSPI0406S00737477	TNFRSF12A	1.0811e-08	4.68445e-07	0.00124864	0.219235	-1.97164	-2.14244	-0.75276	1	1	0			UBE2B
1178	MSPI0406S00739331	NUDT16L1	2.78006e-08	1.59084e-07	1.46823e-05	0.00819866	-1.43182	-1.90631	-0.883122	0	1	0			UBE2C
1179	MSPI0406S00741391	CARHSP1	2.21731e-10	0.00227443	2.2106e-08	3.7873e-07	1.0802	3.0331	1.92433	0	1	1			UBE2E3
1180	MSPI0406S00742614		1.42272e-06	3.16997e-06	0.00104801	2.38384e-06	1.31136	1.53749	1.52161	0	1	1			UBE2L6
1181	MSPI0406S00743607		1.35291e-06	3.30611e-05	2.51683e-05	2.04576e-05	1.96172	3.03778	2.09432	1	1	1			UBE2Q2
1182	MSPI0406S00743945		2.90548e-12	0.0005557	2.08938e-06	3.4052e-11	0.889337	1.89679	1.85608	0	1	1			UBE2QP1
1183	MSPI0406S00747944		1.72319e-06	3.00631e-05	6.58799e-06	0.000246579	1.25087	2.19514	1.27409	0	1	0			UBL7
1184	MSPI0406S00748727	CRYM	1.23416e-26	0.165584	0	1	0.4139	4.00102	-0.128147	0	1	0			UBXN1
1185	MSPI0406S00750274	PRKCB	3.44958e-30	0	3.44579e-05	0.93756	2.72952	2.12408	-0.259616	1	1	0			UBXN6
1186	MSPI0406S00751665		4.72352e-15	0.00546708	3.83084e-09	5.56402e-11	0.482905	1.53307	1.20692	0	1	0			UBXN7
1187	MSPI0406S00752695	IL27	3.48642e-11	0.00475458	0.402591	1.85327e-10	0.638907	0.482628	1.52038	0	0	1			UCKL1
1188	MSPI0406S00752696	IL27	3.51058e-13	1.63643e-10	0.00115812	0	1.22484	1.05937	1.73236	0	0	1			UCKL1AS
1189	MSPI0406S00753097	ATP2A1	1.09979e-14	0.0232761	0.000509343	5.47755e-12	0.662113	1.58565	2.06018	0	1	1			UCMA
1190	MSPI0406S00753887	QPRT	3.74367e-17	0	3.0425e-08	0	1.9625	1.86937	2.04418	1	1	1			UCN2
1191	MSPI0406S00754362	TBX6	0.00031204	0.624145	0.000650725	0.306383	0.393038	2.14171	0.654239	0	1	0			ULBP1
1191	MSPI0406S00754362	YPEL3	0.00031204	0.624145	0.000650725	0.306383	0.393038	2.14171	0.654239	0	1	0			UNC5B
1192	MSPI0406S00754612	CD2BP2	1.5207e-06	9.70783e-05	0.00106793	7.24374e-07	1.0721	1.51058	1.50846	0	1	1			UNQ6494
1193	MSPI0406S00754839	ZNF764	1.95865e-17	6.12782e-13	4.02586e-09	0	1.54075	1.99581	2.26687	1	1	1			UPK2
1194	MSPI0406S00754840	ZNF764	5.67462e-15	2.09025e-13	1.27958e-07	0	1.5536	1.70895	1.94329	1	1	1			USP16
1195	MSPI0406S00755023		2.54647e-18	1	0.000162353	2.93392e-10	0.106769	1.40385	1.61304	0	0	1			USP19
1196	MSPI0406S00755357		2.11109e-09	0.0118851	0.0372686	1.0732e-08	0.691033	0.987693	1.63732	0	0	1			USP50
1197	MSPI0406S00755358		5.8952e-07	0.115472	0.0188765	8.38928e-06	0.630427	1.3908	1.63728	0	0	1			UTP20
1198	MSPI0406S00755489	POL3S	1.68748e-09	5.94128e-07	1	0.101874	1.62257	-0.0154161	0.762332	1	0	0			VEGFB
1198	MSPI0406S00755489	VKORC1	1.68748e-09	5.94128e-07	1	0.101874	1.62257	-0.0154161	0.762332	1	0	0			VILL
1199	MSPI0406S00755626	PYDC1	0.00177301	0.00451919	0.563345	0.000936722	1.38363	0.895379	1.77313	0	0	1			VKORC1
1199	MSPI0406S00755626	TRIM72	0.00177301	0.00451919	0.563345	0.000936722	1.38363	0.895379	1.77313	0	0	1			VPS25
1200	MSPI0406S00755745	ITGAD	0.00127008	0.00484225	0.251997	0.000397656	1.33727	1.19602	1.81948	0	0	1			VPS28
1201	MSPI0406S00755964	ZNF267	1.93991e-09	7.14177e-05	0.017068	1	1.56528	1.70379	0.00880551	1	0	0			VSIG10
1202	MSPI0406S00758103	CBLN1	4.7616e-10	1.74894e-10	0.018403	2.32857e-09	1.57001	1.09935	1.67139	1	0	1			VSIG2
1203	MSPI0406S00758119		4.59301e-09	5.57907e-06	6.19209e-09	0.00044122	1.75533	3.66661	1.57934	1	1	1			VSTM2A
1204	MSPI0406S00760731		1.22652e-05	0.000102377	0.000479257	2.53424e-05	1.52831	2.19726	1.82806	1	1	1			VWA5B2
1205	MSPI0406S00761004	MT1X	5.23931e-06	0.00529632	0.594535	2.59998e-06	0.94748	0.598086	1.66762	0	0	1			WAPAL
1206	MSPI0406S00761350		3.61452e-12	1.06993e-11	0.105932	3.13986e-06	2.60914	1.20344	1.90863	1	0	1			WDFY4
1207	MSPI0406S00761497	CCL22	5.28517e-09	2.23532e-08	0.0184334	1.4745e-09	1.36453	1.05261	1.67388	0	0	1			WDR13
1208	MSPI0406S00761653	CCDC102A	1.23138e-07	0.000569288	0.000725863	8.25485e-08	-0.966109	-1.54316	-1.63966	0	1	1			WDR18
1208	MSPI0406S00761653	GPR114	1.23138e-07	0.000569288	0.000725863	8.25485e-08	-0.966109	-1.54316	-1.63966	0	1	1			WDR25
1209	MSPI0406S00761654	CCDC102A	6.58946e-06	0.434321	3.1808e-05	0.0761395	0.329644	1.73784	0.620545	0	1	0			WDR69
1209	MSPI0406S00761654	GPR114	6.58946e-06	0.434321	3.1808e-05	0.0761395	0.329644	1.73784	0.620545	0	1	0			WFIKKN2
1210	MSPI0406S00761666		7.17799e-07	0.02329	5.48638e-07	0.0187086	0.651456	2.08987	0.769658	0	1	0			WHSC1
1211	MSPI0406S00761667		1.02579e-05	0.0264123	0.000181483	1	0.807428	1.99131	0.209009	0	1	0			WIF1
1212	MSPI0406S00762119	MMP15	1.66958e-08	1.4776e-06	9.79178e-06	1.47159e-08	1.03349	1.55977	1.39258	0	1	0			WIPF1
1213	MSPI0406S00763817	CDH5	1.81489e-08	0.000448668	0.130841	5.08024e-09	0.898318	0.75405	1.57089	0	0	1			XAF1
1214	MSPI0406S00763943	CKLF	9.32049e-17	0	2.23969e-06	6.14041e-14	1.70381	1.38632	1.59676	1	0	1			XCR1
1214	MSPI0406S00763943	TK2	9.32049e-17	0	2.23969e-06	6.14041e-14	1.70381	1.38632	1.59676	1	0	1			XPA
1215	MSPI0406S00763956	CMTM2	8.3153e-23	0	0.0104156	0.000200665	3.195	1.47342	1.44345	1	0	0			XPO5
1216	MSPI0406S00764255	CES3	2.64899e-17	5.2363e-14	3.51029e-07	0	1.69958	1.74283	2.29882	1	1	1			XRRA1
1217	MSPI0406S00764557	PLEKHG4	1.77078e-11	0.402064	1	3.80347e-08	0.543383	0.379904	2.50827	0	0	1			XYLT2
1218	MSPI0406S00764558	PLEKHG4	8.6649e-15	0.0274161	0.00169088	2.77986e-12	0.908288	1.97509	2.91517	0	1	1			YARS
1219	MSPI0406S00764671	HSD11B2	1.29802e-14	1.92885e-13	2.40856e-07	2.42133e-14	1.34658	1.40698	1.57011	0	0	1			YOD1
1220	MSPI0406S00764716	AGRP	3.40694e-09	2.6779e-07	1.40126e-08	0.000157115	1.12522	2.03058	0.96793	0	1	0			YPEL3
1220	MSPI0406S00764716	ATP6V0D1	3.40694e-09	2.6779e-07	1.40126e-08	0.000157115	1.12522	2.03058	0.96793	0	1	0			YWHAQ
1221	MSPI0406S00764770	FAM65A	4.92916e-07	0.00655322	0.000688631	1.50588e-06	0.916143	1.80088	1.69512	0	1	1			ZAP70
1222	MSPI0406S00764799	CTCF	3.94018e-20	1.82346e-07	1	0.170493	1.86053	0.267787	-0.744356	1	0	0			ZAR1L
1223	MSPI0406S00764894		3.27755e-16	7.72247e-07	2.16545e-07	0	0.787778	1.34219	1.54092	0	0	1			ZBTB1
1224	MSPI0406S00765091	CENPT	1.35842e-12	0.000226441	3.40018e-06	1.20666e-11	0.791206	1.61287	1.64071	0	1	1			ZBTB25
1224	MSPI0406S00765091	NUTF2	1.35842e-12	0.000226441	3.40018e-06	1.20666e-11	0.791206	1.61287	1.64071	0	1	1			ZC3H4
1224	MSPI0406S00765091	THAP11	1.35842e-12	0.000226441	3.40018e-06	1.20666e-11	0.791206	1.61287	1.64071	0	1	1			ZCCHC16
1225	MSPI0406S00765518		3.48845e-14	5.88389e-06	1.35479e-13	3.70494e-05	1.34729	3.89727	1.42	0	1	0			ZFHX3
1226	MSPI0406S00765533		3.3196e-11	1.50303e-11	0.00349134	4.80383e-05	3.3724	2.45574	2.2558	1	1	1			ZFPL1
1227	MSPI0406S00765550	SMPD3	6.70399e-27	0.00639129	0	3.23699e-06	0.516112	3.36555	0.936214	0	1	0			ZFPM1
1228	MSPI0406S00765599	SMPD3	0.000524124	0.658573	0.223297	0.00587142	0.475486	1.30829	1.60774	0	0	1			ZG16B
1229	MSPI0406S00766347	COG8	1.08556e-12	5.50579e-07	1	1	1.81555	0.226346	0.130582	1	0	0			ZIC5
1229	MSPI0406S00766347	NIP7	1.08556e-12	5.50579e-07	1	1	1.81555	0.226346	0.130582	1	0	0			ZMYND15
1230	MSPI0406S00767118	DDX19A	2.14742e-05	0.000758635	0.00219164	0.139259	1.65579	2.03633	0.947022	1	1	0			ZMYND8
1230	MSPI0406S00767118	DDX19B	2.14742e-05	0.000758635	0.00219164	0.139259	1.65579	2.03633	0.947022	1	1	0			ZNF136
1231	MSPI0406S00767468	MTSS1L	1.04802e-10	0.00135474	9.54283e-10	0.000163587	0.508572	1.60623	0.654938	0	1	0			ZNF142
1232	MSPI0406S00767469	MTSS1L	4.02605e-13	4.47487e-09	2.07452e-12	7.06589e-07	0.835456	1.92125	0.812324	0	1	0			ZNF146
1233	MSPI0406S00767471		4.75575e-06	0.0959095	2.73406e-05	0.00331886	0.548119	1.83962	0.971891	0	1	0			ZNF19
1234	MSPI0406S00767854	ZNF19	1.74346e-06	0.00424454	0.0240427	8.8711e-07	1.29902	1.77404	2.35437	0	0	1			ZNF195
1234	MSPI0406S00767854	ZNF23	1.74346e-06	0.00424454	0.0240427	8.8711e-07	1.29902	1.77404	2.35437	0	0	1			ZNF215
1235	MSPI0406S00768587	ZFHX3	2.58123e-06	1.32541e-05	0.00157509	0.108034	1.86738	2.3279	0.987483	1	1	0			ZNF23
1236	MSPI0406S00769762		1.45238e-12	3.67297e-11	1.1051e-05	1.60034e-13	2.5379	2.70277	3.22635	1	1	1			ZNF25
1237	MSPI0406S00769763		3.14449e-19	2.74412e-12	2.38864e-09	0	2.98421	3.89663	4.66564	1	1	1			ZNF267
1238	MSPI0406S00769859	CTRB2	0.000239006	0.289395	0.000620108	0.0438518	0.470943	1.76558	0.823647	0	1	0			ZNF331
1239	MSPI0406S00772324	CMIP	3.34821e-06	3.74948e-06	0.184568	0.0256667	1.50171	0.940732	0.925453	1	0	0			ZNF337
1240	MSPI0406S00772348		1.7029e-07	5.13082e-06	1	0.170332	1.98676	0.446169	0.911376	1	0	0			ZNF341
1241	MSPI0406S00773002	CDH13	7.44042e-05	0.38649	0.00142067	1	0.472361	1.86641	-0.0765534	0	1	0			ZNF354A
1242	MSPI0406S00773421	HSBP1	3.72146e-05	0.927877	0.719264	0.0021809	0.325647	0.808631	1.81171	0	0	1			ZNF41
1243	MSPI0406S00774108	KIAA1609	6.71318e-16	1.54111e-05	3.72994e-09	1.03286e-13	0.947719	2.11165	1.95028	0	1	1			ZNF454
1244	MSPI0406S00774109	KIAA1609	1.21049e-10	0.62378	0.000211816	7.46999e-06	0.25544	1.56026	1.22583	0	1	0			ZNF462
1245	MSPI0406S00774697		5.88639e-13	2.14987e-06	0.238534	5.38254e-13	1.83681	1.0696	3.30979	1	0	1			ZNF467
1246	MSPI0406S00774698		5.01431e-11	1.12516e-06	0.301982	1.77167e-11	1.13824	0.564069	1.70532	0	0	1			ZNF485
1247	MSPI0406S00774777	FAM92B	2.73388e-17	0.317748	0.00014447	7.96798e-05	-0.40919	1.73453	1.24116	0	1	0			ZNF512
1248	MSPI0406S00774778	FAM92B	2.55194e-26	0.741008	9.04922e-09	1.32947e-14	0.235139	2.40193	2.42121	0	1	1			ZNF556
1249	MSPI0406S00775619	GINS2	1.37213e-08	0.000136419	0.000333822	1.53718e-08	1.16125	1.96421	1.91326	0	1	1			ZNF565
1250	MSPI0406S00776462	FOXL1	3.93883e-09	4.0704e-06	0.00315117	3.9451e-10	1.12287	1.25994	1.73912	0	0	1			ZNF574
1251	MSPI0406S00777065		2.91658e-14	1.70792e-08	5.60867e-07	0	1.73979	2.47326	2.84664	1	1	1			ZNF667
1252	MSPI0406S00777570	LOC100129637	0.000112252	0.00329269	0.0533329	2.60189e-05	1.0227	1.23084	1.56205	0	0	1			ZNF678
1253	MSPI0406S00778545	ZFPM1	1.10845e-05	0.00154595	4.75694e-05	0.000147812	0.917846	1.84053	1.2173	0	1	0			ZNF691
1254	MSPI0406S00778762		3.77335e-09	3.79887e-08	0.296658	0.0307339	1.99469	0.927142	1.01723	1	0	0			ZNF740
1255	MSPI0406S00778763		3.63708e-12	6.15671e-06	1	1	3.04247	0.239856	-0.083906	1	0	0			ZNF764
1256	MSPI0406S00778849	MVD	1.38186e-06	0.408787	4.37713e-06	0.1351	0.285724	1.59041	0.468061	0	1	0			ZNF862
1257	MSPI0406S00778885	SNAI3	7.33112e-13	6.87983e-05	4.54931e-06	1.13802e-12	0.815198	1.44307	1.56746	0	0	1			ZNHIT1
1258	MSPI0406S00778889	SNAI3	6.35148e-06	0.117324	0.548167	1.79726e-05	0.649065	0.659736	1.61544	0	0	1			ZNRF3
1259	MSPI0406S00780114	CPNE7	3.61067e-10	2.98553e-06	1	0.587854	2.03495	0.00719134	0.56282	1	0	0			ZPBP
1260	MSPI0406S00780228	C16orf55	2.77832e-08	0.00348625	0.000358951	8.96959e-08	0.896923	1.73666	1.74285	0	1	1
1260	MSPI0406S00780228	CHMP1A	2.77832e-08	0.00348625	0.000358951	8.96959e-08	0.896923	1.73666	1.74285	0	1	1
1261	MSPI0406S00780577	MC1R	7.35286e-23	9.26866e-06	1.03235e-11	0	0.90438	2.26843	2.258	0	1	1
1262	MSPI0406S00780710	DBNDD1	2.55377e-08	1.46969e-06	0.000431165	0.127991	1.29992	1.65767	0.590486	0	1	0
1263	MSPI0406S00781150	RPH3AL	1.08696e-06	5.00957e-05	0.112294	0.67787	1.55477	1.25618	0.456139	1	0	0
1264	MSPI0406S00781284		5.0923e-09	5.62151e-09	0.0492835	5.20487e-08	1.63897	1.0365	1.69964	1	0	1
1265	MSPI0406S00781434		7.19948e-05	0.000110668	0.00166563	0.000363839	1.16224	1.62087	1.25135	0	1	0
1266	MSPI0406S00782049	ABR	1.86325e-10	2.05843e-10	5.63172e-05	1.04318e-10	1.46498	1.49364	1.68227	0	0	1
1267	MSPI0406S00782872	SERPINF1	7.03018e-05	0.0212912	0.00236239	0.000482969	0.643003	1.57664	1.1013	0	1	0
1268	MSPI0406S00783939	RAP1GAP2	3.31283e-10	6.76555e-11	4.5795e-06	1.92195e-08	1.4075	1.5803	1.33793	0	1	0
1269	MSPI0406S00783940	RAP1GAP2	3.49737e-10	1.39352e-06	2.23921e-08	3.87675e-08	0.961585	1.84051	1.30133	0	1	0
1270	MSPI0406S00784823	ITGAE	2.41999e-18	0.857041	1	2.52152e-11	0.328605	0.083675	3.30737	0	0	1
1271	MSPI0406S00784824	ITGAE	6.89374e-12	0.0533818	1	2.07959e-09	1.09203	0.121723	3.29083	0	0	1
1272	MSPI0406S00784904		1.89671e-28	1.76239e-06	8.25984e-13	0	1.06374	2.69855	2.89737	0	1	1
1273	MSPI0406S00784905		2.00245e-09	2.58974e-10	0.00207941	2.0517e-08	1.88341	1.56498	1.89266	1	1	1
1274	MSPI0406S00785089		2.05218e-30	0.00191932	0	1	-0.784391	3.76952	-0.0388866	0	1	0
1275	MSPI0406S00785090		1.0647e-20	0.0224145	1.09394e-11	1	-0.740898	3.27144	-0.0513593	0	1	0
1276	MSPI0406S00785092		2.29353e-11	0.296891	4.23473e-10	0.639749	0.292543	1.98234	0.238834	0	1	0
1277	MSPI0406S00785093		2.75112e-08	0.389809	0.000226669	5.92249e-05	0.386163	1.731	1.28859	0	1	0
1278	MSPI0406S00785511	SPNS2	5.38053e-21	0	1.79362e-12	0	2.4399	2.65793	2.59479	1	1	1
1279	MSPI0406S00785512	SPNS2	2.10232e-19	0	1.40034e-05	0	2.1481	1.57958	2.50027	1	1	1
1280	MSPI0406S00785825	CXCL16	0.000161187	8.64344e-05	0.0242385	0.00570153	1.55082	1.56188	1.27209	1	0	0
1280	MSPI0406S00785825	ZMYND15	0.000161187	8.64344e-05	0.0242385	0.00570153	1.55082	1.56188	1.27209	1	0	0
1281	MSPI0406S00785826	CXCL16	2.90156e-06	3.95799e-06	0.000102195	4.70966e-05	1.27488	1.74014	1.26947	0	1	0
1281	MSPI0406S00785826	ZMYND15	2.90156e-06	3.95799e-06	0.000102195	4.70966e-05	1.27488	1.74014	1.26947	0	1	0
1282	MSPI0406S00786100	SPAG7	6.98275e-11	2.40242e-10	0.000160329	1.71024e-11	1.28635	1.311	1.53625	0	0	1
1283	MSPI0406S00787172	AIPL1	2.3766e-08	0.000188852	0.00342245	1.46484e-08	0.92912	1.25598	1.58501	0	0	1
1284	MSPI0406S00787441	XAF1	2.9659e-14	1.44717e-08	2.24448e-05	1.32947e-14	1.32209	1.60835	2.20007	0	1	1
1285	MSPI0406S00787569	C17orf49	2.11113e-16	5.76214e-13	3.22883e-09	0	1.42866	1.86039	2.0075	0	1	1
1285	MSPI0406S00787569	RNASEK	2.11113e-16	5.76214e-13	3.22883e-09	0	1.42866	1.86039	2.0075	0	1	1
1286	MSPI0406S00787678	ASGR2	7.9542e-09	1.30376e-07	0.26882	1.05804e-08	1.70796	0.839944	2.0463	1	0	1
1287	MSPI0406S00787751	ASGR1	3.73167e-08	8.78819e-08	0.0520917	3.58598e-08	1.61154	1.13183	1.90312	1	0	1
1288	MSPI0406S00787798	ACADVL	3.0429e-10	2.19459e-07	4.29306e-05	5.56402e-11	1.09273	1.41177	1.59111	0	0	1
1288	MSPI0406S00787798	DLG4	3.0429e-10	2.19459e-07	4.29306e-05	5.56402e-11	1.09273	1.41177	1.59111	0	0	1
1289	MSPI0406S00787799	ACADVL	4.92691e-14	5.40461e-11	3.55231e-07	1.32947e-14	1.64331	2.05025	2.31807	1	1	1
1289	MSPI0406S00787799	DLG4	4.92691e-14	5.40461e-11	3.55231e-07	1.32947e-14	1.64331	2.05025	2.31807	1	1	1
1290	MSPI0406S00787828	GABARAP	1.01443e-08	3.92377e-07	0.371133	8.92768e-09	1.18356	0.553118	1.5157	0	0	1
1290	MSPI0406S00787828	PHF23	1.01443e-08	3.92377e-07	0.371133	8.92768e-09	1.18356	0.553118	1.5157	0	0	1
1291	MSPI0406S00787947	NEURL4	9.89596e-17	6.30386e-12	1.30168e-08	0	1.34586	1.77129	2.0187	0	1	1
1292	MSPI0406S00787974	KCTD11	2.18719e-07	1	0.00353742	0.0037505	0.175328	2.20212	1.50086	0	1	1
1292	MSPI0406S00787974	TMEM95	2.18719e-07	1	0.00353742	0.0037505	0.175328	2.20212	1.50086	0	1	1
1293	MSPI0406S00788096	CHRNB1	1.03954e-11	1.22533e-06	3.37111e-07	5.916e-12	1.38182	2.10121	2.04574	0	1	1
1293	MSPI0406S00788096	FGF11	1.03954e-11	1.22533e-06	3.37111e-07	5.916e-12	1.38182	2.10121	2.04574	0	1	1
1294	MSPI0406S00788262	CD68	8.37939e-14	0	1.01317e-06	1.61378e-08	1.77492	1.69129	1.38325	1	1	0
1294	MSPI0406S00788262	MPDU1	8.37939e-14	0	1.01317e-06	1.61378e-08	1.77492	1.69129	1.38325	1	1	0
1294	MSPI0406S00788262	SNORA67	8.37939e-14	0	1.01317e-06	1.61378e-08	1.77492	1.69129	1.38325	1	1	0
1295	MSPI0406S00788263	CD68	0.002364	0.00266674	0.274526	0.246817	-1.50096	-1.21698	-0.873894	1	0	0
1295	MSPI0406S00788263	MPDU1	0.002364	0.00266674	0.274526	0.246817	-1.50096	-1.21698	-0.873894	1	0	0
1295	MSPI0406S00788263	SNORA67	0.002364	0.00266674	0.274526	0.246817	-1.50096	-1.21698	-0.873894	1	0	0
1296	MSPI0406S00788266	MPDU1	1.25919e-14	3.50478e-06	8.57804e-05	0	1.00513	1.39833	1.987	0	0	1
1296	MSPI0406S00788266	SOX15	1.25919e-14	3.50478e-06	8.57804e-05	0	1.00513	1.39833	1.987	0	0	1
1297	MSPI0406S00788275	SOX15	1.79994e-09	0.0156009	0.000327527	9.10552e-08	0.763631	1.73134	1.76596	0	1	1
1298	MSPI0406S00788296	FXR2	0.000493178	0.00309395	0.00152896	0.113892	-1.03306	-1.74325	-0.736549	0	1	0
1298	MSPI0406S00788296	SHBG	0.000493178	0.00309395	0.00152896	0.113892	-1.03306	-1.74325	-0.736549	0	1	0
1299	MSPI0406S00788442	DNAH2	9.50284e-07	0.00521903	0.00549285	8.52385e-07	0.843602	1.37578	1.55903	0	0	1
1300	MSPI0406S00788543		3.76869e-07	0.0113954	0.00024122	3.37839e-06	0.687069	1.53274	1.30029	0	1	0
1301	MSPI0406S00788663	CNTROB	0.00711565	0.00675762	0.919882	0.173234	-1.63592	-0.7094	-1.14745	1	0	0
1301	MSPI0406S00788663	KCNAB3	0.00711565	0.00675762	0.919882	0.173234	-1.63592	-0.7094	-1.14745	1	0	0
1301	MSPI0406S00788663	TRAPPC1	0.00711565	0.00675762	0.919882	0.173234	-1.63592	-0.7094	-1.14745	1	0	0
1302	MSPI0406S00788919	PER1	1.20522e-12	0.000421481	5.01654e-05	4.31018e-12	0.926284	1.70663	2.01233	0	1	1
1303	MSPI0406S00788967	C17orf59	4.82116e-13	1.61621e-08	1.22522e-05	9.48353e-14	1.0461	1.31403	1.64982	0	0	1
1304	MSPI0406S00789257		4.95617e-11	6.69096e-05	9.5179e-07	1.46486e-10	0.811381	1.5158	1.40683	0	1	0
1305	MSPI0406S00790546		6.24411e-26	0	0.000431921	0.12764	3.11629	1.94266	0.713475	1	1	0
1306	MSPI0406S00790547		5.51465e-06	7.42683e-05	0.242397	0.478198	1.53416	1.0458	0.563918	1	0	0
1307	MSPI0406S00790819	MYH3	4.02307e-10	0.00066574	3.15608e-05	4.36476e-09	0.747482	1.53263	1.42625	0	1	0
1308	MSPI0406S00790869	TMEM220	3.09949e-09	1.28051e-07	0.00011446	0.329191	1.61594	2.05052	0.572194	1	1	0
1309	MSPI0406S00791743		3.51059e-13	0.0317467	4.70075e-08	1.37108e-08	0.428974	1.55515	1.14323	0	1	0
1310	MSPI0406S00793770		1.59785e-22	6.34777e-11	4.37701e-13	0	0.851995	1.55799	1.56152	0	1	1
1311	MSPI0406S00794513	SREBF1	2.89128e-11	1.32307e-05	0.0106653	6.20788e-12	1.10342	1.15799	2.00681	0	0	1
1312	MSPI0406S00794517		5.24881e-15	0.000883277	9.74872e-08	5.86287e-12	0.595531	1.5054	1.38758	0	1	0
1313	MSPI0406S00794518		1.74796e-07	0.210881	0.000652193	6.66995e-05	0.607296	2.05631	1.68488	0	1	1
1314	MSPI0406S00796188	SLC47A2	4.50338e-12	2.62593e-07	1.53215e-08	1.11443e-11	0.9057	1.63733	1.36225	0	1	0
1315	MSPI0406S00796230	ALDH3A1	8.06916e-09	0.210255	0.0104992	2.27209e-06	0.623249	1.7012	2.02571	0	0	1
1316	MSPI0406S00797916		1.57826e-12	1.95334e-07	0.0887266	2.20153e-13	1.61407	1.03779	2.57378	1	0	1
1317	MSPI0406S00798646	RAB34	7.75454e-18	0	1.60399e-10	0	2.21058	2.5035	2.44403	1	1	1
1317	MSPI0406S00798646	RPL23A	7.75454e-18	0	1.60399e-10	0	2.21058	2.5035	2.44403	1	1	1
1317	MSPI0406S00798646	SNORD42A	7.75454e-18	0	1.60399e-10	0	2.21058	2.5035	2.44403	1	1	1
1317	MSPI0406S00798646	SNORD42B	7.75454e-18	0	1.60399e-10	0	2.21058	2.5035	2.44403	1	1	1
1317	MSPI0406S00798646	SNORD4A	7.75454e-18	0	1.60399e-10	0	2.21058	2.5035	2.44403	1	1	1
1318	MSPI0406S00799586	EFCAB5	1.79605e-11	1.44746e-10	4.75545e-06	0.000599384	-1.53751	-1.67331	-0.935554	1	1	0
1318	MSPI0406S00799586	SSH2	1.79605e-11	1.44746e-10	4.75545e-06	0.000599384	-1.53751	-1.67331	-0.935554	1	1	0
1319	MSPI0406S00799790	CPD	6.13542e-19	0.000354094	1.45032e-09	1.32947e-14	1.15282	3.10254	2.95865	0	1	1
1320	MSPI0406S00799866	TBC1D29	6.90706e-07	0.000414396	0.000297125	8.61925e-07	0.926952	1.55698	1.43265	0	1	0
1321	MSPI0406S00800192	ADAP2	0.000230791	0.362365	1	0.00388446	0.608866	-0.374299	1.51666	0	0	1
1322	MSPI0406S00801760	CCL1	1.11527e-26	0.000104549	3.17902e-05	0	1.1259	1.92756	3.53729	0	1	1
1323	MSPI0406S00804174		5.35934e-07	1.51956e-07	0.00423241	0.00182482	-1.51697	-1.48641	-1.07687	1	0	0
1324	MSPI0406S00804573	PIP4K2B	0.000628065	0.00248983	0.00144163	0.00847337	1.81615	3.04615	1.83027	1	1	1
1325	MSPI0406S00804964	CACNB1	2.35254e-15	1.17014e-12	1.39896e-08	0	1.54867	1.95555	2.10264	1	1	1
1325	MSPI0406S00804964	RPL19	2.35254e-15	1.17014e-12	1.39896e-08	0	1.54867	1.95555	2.10264	1	1	1
1326	MSPI0406S00805709		9.08228e-09	9.4726e-07	2.36448e-08	2.76947e-05	1.48324	2.75209	1.46476	0	1	0
1327	MSPI0406S00805926		0.000243937	0.000561999	0.000846506	0.00774341	1.04857	1.67701	0.983891	0	1	0
1328	MSPI0406S00805952		5.80668e-19	0.0744123	0.00723582	2.42133e-14	0.605202	1.39784	2.55262	0	0	1
1329	MSPI0406S00805953		3.78166e-21	0.98401	1	1.132e-10	-0.220883	-0.14591	2.80034	0	0	1
1330	MSPI0406S00806077	TNS4	2.1685e-10	0.901197	1.34565e-06	0.936033	-0.13787	1.54755	0.163805	0	1	0
1331	MSPI0406S00806078	TNS4	4.37092e-18	0.00426436	0	2.94065e-10	0.677352	2.81248	1.59034	0	1	1
1332	MSPI0406S00806546	KRT16	1.06111e-13	0.00935672	0.000898514	1.13515e-11	0.604721	1.20239	1.68679	0	0	1
1333	MSPI0406S00806922	ACLY	2.55987e-12	1.98827e-10	3.49938e-09	1.09149e-11	1.38829	2.06005	1.70486	0	1	1
1334	MSPI0406S00806972	CNP	2.13611e-10	4.94346e-11	0.00162609	0.000118033	2.19682	1.79062	1.46765	1	1	0
1335	MSPI0406S00807208	HCRT	1.74895e-12	0.0219114	0.00416923	1.2585e-10	0.623665	1.21307	1.78782	0	0	1
1335	MSPI0406S00807208	KCNH4	1.74895e-12	0.0219114	0.00416923	1.2585e-10	0.623665	1.21307	1.78782	0	0	1
1336	MSPI0406S00807551	COASY	4.7456e-11	0.00260831	0.00165262	3.96974e-10	0.710688	1.23379	1.61096	0	0	1
1336	MSPI0406S00807551	MLX	4.7456e-11	0.00260831	0.00165262	3.96974e-10	0.710688	1.23379	1.61096	0	0	1
1337	MSPI0406S00807734	LOC100190938	1.05788e-13	5.94381e-05	0.0082029	9.48353e-14	0.944532	1.05002	1.94613	0	0	1
1337	MSPI0406S00807734	RAMP2	1.05788e-13	5.94381e-05	0.0082029	9.48353e-14	0.944532	1.05002	1.94613	0	0	1
1338	MSPI0406S00807748	VPS25	2.85989e-09	0.0106083	0.00304369	2.21483e-08	0.699933	1.32932	1.59027	0	0	1
1339	MSPI0406S00807808	AOC2	5.91727e-05	0.00427011	0.00212789	0.000118166	0.987438	1.68813	1.47468	0	1	0
1340	MSPI0406S00807817	AOC3	1.11734e-07	0.000121094	2.80979e-06	1.14747e-06	0.970221	1.8393	1.33728	0	1	0
1341	MSPI0406S00807818	AOC3	0.00257133	0.0722853	0.00223115	0.211854	0.630609	1.56406	0.577111	0	1	0
1342	MSPI0406S00808568	SOST	2.89576e-13	0.000952819	0.000234971	1.49007e-11	0.72547	1.30949	1.71027	0	0	1
1343	MSPI0406S00808569	SOST	1.12566e-10	0.560277	0.00752825	4.85468e-07	0.323203	1.43497	1.63346	0	0	1
1344	MSPI0406S00808748		0.000141152	1	0.00307275	1	-0.0721487	1.83458	-0.0839907	0	1	0
1345	MSPI0406S00809246		1.49114e-16	4.66692e-11	2.86786e-10	0	0.998541	1.54196	1.50737	0	1	1
1346	MSPI0406S00809833	DCAKD	1.08361e-07	3.82849e-08	0.00037868	5.56521e-07	1.38791	1.51272	1.41968	0	1	0
1346	MSPI0406S00809833	NMT1	1.08361e-07	3.82849e-08	0.00037868	5.56521e-07	1.38791	1.51272	1.41968	0	1	0
1347	MSPI0406S00810245	SH3D20	8.00464e-17	0	0.00342119	7.79057e-10	2.56555	1.42749	1.96274	1	0	1
1348	MSPI0406S00810247	SH3D20	4.08547e-13	1.80936e-08	7.49769e-09	4.13249e-13	1.50441	2.47786	2.24291	1	1	1
1349	MSPI0406S00810570		3.92405e-06	0.000696834	2.80299e-05	0.117126	1.0861	2.00978	0.662959	0	1	0
1350	MSPI0406S00810571		3.66364e-05	0.0126256	0.00176642	0.947268	0.927792	1.88547	0.278352	0	1	0
1351	MSPI0406S00810820	KIAA1267	3.75857e-13	7.60391e-13	0.0429679	3.72376e-06	1.50444	0.763765	1.04546	1	0	0
1352	MSPI0406S00811669	TBX21	4.88689e-07	6.46877e-08	0.0413031	0.000301723	1.66464	1.2036	1.33017	1	0	0
1353	MSPI0406S00811750	LRRC46	1.17248e-12	2.87827e-13	5.79312e-08	4.5203e-11	1.752	2.0181	1.71769	1	1	1
1353	MSPI0406S00811750	MRPL10	1.17248e-12	2.87827e-13	5.79312e-08	4.5203e-11	1.752	2.0181	1.71769	1	1	1
1354	MSPI0406S00811762	SCRN2	9.3746e-17	9.83278e-13	4.44758e-10	0	1.59877	2.18706	2.25651	1	1	1
1355	MSPI0406S00811872	ATAD4	9.22357e-06	0.968491	0.00197847	1	-0.195099	1.74475	0.134467	0	1	0
1356	MSPI0406S00812211	HOXB3	1.37419e-06	3.61523e-07	0.000325424	4.3845e-06	1.48326	1.73175	1.51443	0	1	1
1356	MSPI0406S00812211	HOXB4	1.37419e-06	3.61523e-07	0.000325424	4.3845e-06	1.48326	1.73175	1.51443	0	1	1
1357	MSPI0406S00812229	HOXB3	1.83172e-06	0.0227991	0.0937522	2.43661e-06	0.938494	1.25385	1.98295	0	0	1
1357	MSPI0406S00812229	HOXB5	1.83172e-06	0.0227991	0.0937522	2.43661e-06	0.938494	1.25385	1.98295	0	0	1
1358	MSPI0406S00812234	HOXB5	1.24395e-10	9.99972e-08	1	3.69353e-09	1.23856	0.170865	1.55424	0	0	1
1359	MSPI0406S00812236	HOXB6	8.27569e-10	3.84975e-07	2.07603e-07	0.0544053	1.3819	2.296	0.710614	0	1	0
1360	MSPI0406S00812604	IGF2BP1	0.000104207	0.000687446	0.00424371	0.293544	-1.10584	-1.56187	-0.556643	0	1	0
1361	MSPI0406S00813610	COL1A1	0.000264844	0.00164081	0.413952	9.98468e-05	1.34406	0.92429	1.81882	0	0	1
1362	MSPI0406S00813718	XYLT2	2.18517e-19	7.64344e-13	0.000650643	0.670471	3.30283	2.54537	0.53249	1	1	0
1363	MSPI0406S00813719	XYLT2	1.78859e-21	0	4.61331e-06	0.00136948	2.73747	2.15189	1.09676	1	1	0
1364	MSPI0406S00813773	ACSF2	0.00158598	0.0345505	0.695858	0.000817021	0.944055	0.66379	1.53777	0	0	1
1365	MSPI0406S00813846	MYCBPAP	1.5602e-06	0.00935227	0.144794	1.13256e-06	1.00697	1.10002	1.9669	0	0	1
1366	MSPI0406S00814188	WFIKKN2	1.39703e-14	1	0.00399996	6.17282e-06	-0.16593	1.5574	1.57247	0	1	1
1367	MSPI0406S00815911		1.9617e-07	0.0227845	0.000558045	2.74788e-06	0.712543	1.64079	1.50065	0	1	1
1368	MSPI0406S00815912		2.39456e-11	0.0135659	1.19265e-05	4.36456e-09	0.577779	1.54637	1.42576	0	1	0
1369	MSPI0406S00816111	CUEDC1	0.00062793	0.843087	0.00124349	0.806778	0.421293	2.92741	0.545878	0	1	0
1370	MSPI0406S00816231	MSX2P1	7.60623e-15	3.647e-08	6.76685e-08	1.32947e-14	1.21643	1.85565	1.99948	0	1	1
1370	MSPI0406S00816231	OR4D1	7.60623e-15	3.647e-08	6.76685e-08	1.32947e-14	1.21643	1.85565	1.99948	0	1	1
1371	MSPI0406S00816586	DKFZp434N177	7.22377e-16	0.000184773	0.520204	4.91065e-13	0.903727	0.534345	2.14855	0	0	1
1371	MSPI0406S00816586	RAD51C	7.22377e-16	0.000184773	0.520204	4.91065e-13	0.903727	0.534345	2.14855	0	0	1
1371	MSPI0406S00816586	TEX14	7.22377e-16	0.000184773	0.520204	4.91065e-13	0.903727	0.534345	2.14855	0	0	1
1372	MSPI0406S00816587	DKFZp434N177	3.01641e-17	0.00239684	0.0518848	1.32947e-14	0.819055	0.96156	2.37718	0	0	1
1372	MSPI0406S00816587	RAD51C	3.01641e-17	0.00239684	0.0518848	1.32947e-14	0.819055	0.96156	2.37718	0	0	1
1372	MSPI0406S00816587	TEX14	3.01641e-17	0.00239684	0.0518848	1.32947e-14	0.819055	0.96156	2.37718	0	0	1
1373	MSPI0406S00817603	C17orf64	2.26456e-15	0.149786	1	1.93311e-11	0.749987	0.0627015	3.08458	0	0	1
1374	MSPI0406S00818498	TLK2	1.08054e-08	0.000130681	0.00134954	5.29963e-09	1.12672	1.5871	1.94253	0	1	1
1375	MSPI0406S00818589	MRC2	5.01079e-13	8.37302e-12	4.76961e-07	6.98786e-14	1.69165	1.99215	2.14476	1	1	1
1376	MSPI0406S00818929		3.42759e-09	0.00187934	0.00142067	1	1.09279	1.83356	-0.175795	0	1	0
1377	MSPI0406S00819000	ACE	1.30695e-11	0.000574845	1.25415e-08	7.58217e-09	0.628993	1.63933	1.16756	0	1	0
1378	MSPI0406S00819368	CD79B	4.46192e-27	1.67356e-13	0.260238	1	2.55385	-0.887369	0.0280837	1	0	0
1379	MSPI0406S00819440	ICAM2	3.25108e-12	1.1087e-05	1	1	1.59143	-0.0767526	-0.0713607	1	0	0
1380	MSPI0406S00819680		3.06898e-13	0.0558728	0.786704	7.49783e-11	0.90043	0.617123	2.95985	0	0	1
1381	MSPI0406S00819954	LOC146880	2.37355e-13	1.13952e-07	6.34353e-09	4.26759e-13	1.1655	2.09186	1.84814	0	1	1
1382	MSPI0406S00821660	NOL11	1.27635e-05	1	0.000778701	1	-0.0882439	1.63268	0.147351	0	1	0
1383	MSPI0406S00821982		0.000147612	0.0290856	0.0005128	0.00423019	0.736399	1.79792	1.02885	0	1	0
1384	MSPI0406S00823597	SSTR2	5.35596e-14	8.1525e-13	2.93643e-10	1.92234e-06	2.99006	4.00354	2.11411	1	1	1
1385	MSPI0406S00823598	SSTR2	4.3504e-08	0.000268826	0.000127036	0.97844	1.44065	2.45518	0.299017	0	1	0
1386	MSPI0406S00824788	GPRC5C	6.95571e-13	1.02657e-13	0.000247422	2.1308e-10	1.91989	1.53172	1.80724	1	1	1
1387	MSPI0406S00824789	GPRC5C	1.87657e-21	0	2.51812e-09	0	2.89321	2.65781	3.26739	1	1	1
1388	MSPI0406S00824903	CD300C	1.19603e-16	0.0115736	0.015525	1.19695e-13	0.840083	1.33381	2.67264	0	0	1
1389	MSPI0406S00825048	RAB37	0.00135164	0.00167842	0.587703	0.0015131	1.36379	0.796576	1.58638	0	0	1
1390	MSPI0406S00825796	GRB2	4.7593e-07	4.93597e-07	0.134581	3.1705e-06	1.86962	1.16203	2.02165	1	0	1
1391	MSPI0406S00826166	RECQL5	0.00430951	0.355644	0.156103	0.00976062	-0.698163	-1.49554	-1.58536	0	0	1
1391	MSPI0406S00826166	SAP30BP	0.00430951	0.355644	0.156103	0.00976062	-0.698163	-1.49554	-1.58536	0	0	1
1392	MSPI0406S00826551	CDK3	6.46776e-11	0.000189106	0.000284964	1.07787e-10	0.936275	1.52411	1.84328	0	1	1
1393	MSPI0406S00827067	AANAT	2.47142e-07	0.0131623	2.20382e-06	0.000152111	1.05786	2.95779	1.69502	0	1	1
1394	MSPI0406S00827099	RHBDF2	7.41997e-08	0.575302	1	1.3353e-05	0.34377	0.263419	1.5239	0	0	1
1395	MSPI0406S00828082	SEPT9	8.63359e-14	7.81609e-14	1.71789e-08	5.61425e-13	1.55258	1.78411	1.62026	1	1	1
1396	MSPI0406S00828174		6.88648e-16	0	0.00138402	1.36782e-13	2.16792	1.34909	2.10524	1	0	1
1397	MSPI0406S00828175		1.37839e-19	0	0.486097	1.74468e-05	2.77547	0.653532	1.51341	1	0	1
1398	MSPI0406S00828195		6.18407e-11	4.60788e-12	5.81787e-05	2.77936e-09	1.60273	1.49778	1.55635	1	0	1
1399	MSPI0406S00829310		1.42016e-08	1.196e-09	0.000382998	1.06046e-05	2.52993	2.54162	2.14555	1	1	1
1400	MSPI0406S00829311		5.79272e-15	3.81568e-11	2.89977e-12	9.48353e-14	1.73611	2.99405	2.28446	1	1	1
1401	MSPI0406S00829652	CYTH1	2.81793e-21	0.0155882	0.0185879	0	0.61604	0.982189	2.31789	0	0	1
1402	MSPI0406S00829847		1.82822e-07	4.88035e-05	0.000744377	7.50872e-08	1.55098	2.17716	2.32265	1	1	1
1403	MSPI0406S00829919	LGALS3BP	3.27162e-12	1.83642e-12	3.87029e-07	9.79287e-11	1.70902	1.91353	1.70435	1	1	1
1404	MSPI0406S00829920	LGALS3BP	9.22966e-08	1.8102e-08	0.0100211	4.96003e-07	1.99108	1.64284	2.03326	1	0	1
1405	MSPI0406S00830470		1.88454e-08	1.08279e-05	5.51639e-05	1.01955e-08	1.25872	1.90182	1.8598	0	1	1
1406	MSPI0406S00831373	CARD14	0.000634687	0.0208556	0.00392542	0.00169089	1.01948	1.98047	1.46799	0	1	0
1407	MSPI0406S00831605	RNF213	1.12084e-15	2.63826e-06	1.28206e-08	3.40047e-14	0.765841	1.50168	1.49557	0	1	0
1408	MSPI0406S00832764		4.05121e-09	0.0585883	9.17583e-08	0.000285033	0.574726	2.27411	1.07839	0	1	0
1409	MSPI0406S00832876	TMEM105	2.65968e-14	0.00514568	0.00499688	6.38838e-13	0.674065	1.10353	1.84045	0	0	1
1410	MSPI0406S00833844	FASN	8.45597e-06	0.065101	0.000371572	0.000371114	0.661459	1.83292	1.25733	0	1	0
1411	MSPI0406S00834028	SLC16A3	1.01331e-15	0.0260319	0.457669	6.0054e-13	0.522992	0.453028	1.74007	0	0	1
1412	MSPI0406S00834061		9.16333e-19	1.55894e-13	0.293939	0.101758	3.51181	1.16052	1.05216	1	0	0
1413	MSPI0406S00834538		0.00223574	0.00149547	0.152282	0.0034583	1.88875	1.69157	1.96079	1	0	1
1414	MSPI0406S00834705	FN3KRP	2.40879e-05	0.00216106	3.41536e-05	0.0571883	1.07352	2.249	0.845113	0	1	0
1415	MSPI0406S00837175	ADCYAP1	4.09472e-11	5.84686e-10	0.000199157	5.428e-12	1.29052	1.28718	1.67008	0	0	1
1416	MSPI0406S00837459	SMCHD1	1.12447e-05	0.464487	0.919753	0.00108144	0.508508	-0.517206	1.56463	0	0	1
1417	MSPI0406S00837609	LPIN2	1.25515e-09	2.33194e-06	0.473054	0.806778	1.51512	0.684126	0.325483	1	0	0
1418	MSPI0406S00841621		2.74266e-13	0.00160886	2.93674e-08	1	1.05558	2.90296	-0.210717	0	1	0
1419	MSPI0406S00841622		4.47962e-13	0.0120925	2.1315e-10	1	0.729868	2.8761	0.131809	0	1	0
1420	MSPI0406S00841870	C18orf1	3.86416e-11	2.21955e-11	0.0876111	1.28544e-06	1.81429	0.904078	1.46692	1	0	0
1421	MSPI0406S00844794	CDH2	1.54558e-05	4.85968e-06	0.00231038	0.00107766	-1.58695	-1.79295	-1.35699	1	1	0
1422	MSPI0406S00846122	MOCOS	2.24637e-05	0.000115279	0.451834	0.22267	-1.53119	-0.837609	-0.744522	1	0	0
1423	MSPI0406S00846536		4.64769e-11	2.12997e-08	6.49828e-06	5.58695e-12	1.19654	1.5736	1.70156	0	1	1
1424	MSPI0406S00847352	SETBP1	1.21879e-07	0.00182116	0.369815	1.50967e-07	1.09442	0.789241	2.02689	0	0	1
1425	MSPI0406S00849746	SKA1	3.75103e-17	1	1	6.14596e-09	-0.0659482	0.20767	1.64156	0	0	1
1426	MSPI0406S00852331	PMAIP1	6.70037e-14	9.14276e-12	1.2763e-05	0.002958	-2.65413	-2.63795	-1.31268	1	1	0
1427	MSPI0406S00852911	PHLPP1	2.05647e-06	0.770168	0.747613	0.000271001	0.355218	0.651936	1.75286	0	0	1
1428	MSPI0406S00854478	NETO1	6.39951e-19	0	1.3832e-08	1.89999e-05	-1.70354	-1.73232	-0.897127	1	1	0
1429	MSPI0406S00855985		5.08487e-06	0.00188861	0.0630985	1.68488e-06	1.10047	1.2206	1.8373	0	0	1
1430	MSPI0406S00855986		0.00073108	0.118681	0.506911	0.000625425	0.918998	0.975632	1.89168	0	0	1
1431	MSPI0406S00857823		1.57423e-06	0.000274476	2.67695e-05	0.201147	2.49532	4.56343	1.32636	1	1	0
1432	MSPI0406S00858021	CTDP1	0.000602597	0.156395	0.910018	0.000881639	0.740447	0.527362	1.59818	0	0	1
1433	MSPI0406S00858817	SHC2	1.02595e-16	0	1.041e-09	1.89671e-13	-1.83119	-1.83122	-1.59118	1	1	1
1434	MSPI0406S00859438	CFD	1.06492e-16	0.0800336	0.11373	4.20022e-13	0.587431	0.910513	2.33572	0	0	1
1435	MSPI0406S00859548	ARID3A	6.89647e-05	0.00775081	0.00264159	0.000143086	0.798251	1.50588	1.20662	0	1	0
1436	MSPI0406S00859641	WDR18	6.6718e-17	0	2.78352e-09	0	1.25536	1.44845	1.56588	0	0	1
1437	MSPI0406S00860056	ATP5D	3.67021e-09	0.00237332	0.00839319	7.52189e-09	0.766464	1.10544	1.57029	0	0	1
1437	MSPI0406S00860056	C19orf26	3.67021e-09	0.00237332	0.00839319	7.52189e-09	0.766464	1.10544	1.57029	0	0	1
1438	MSPI0406S00860282		2.16008e-14	3.18582e-08	2.49552e-10	1.74543e-13	0.825445	1.53884	1.29329	0	1	0
1439	MSPI0406S00860938	ATP8B3	2.92171e-08	3.0472e-06	1.11841e-06	1.73608e-06	1.06301	1.83305	1.31762	0	1	0
1440	MSPI0406S00861623	JSRP1	1.30843e-14	2.23601e-10	8.22399e-12	1.60034e-13	1.1762	2.04165	1.58572	0	1	1
1441	MSPI0406S00861737	LSM7	6.04101e-19	0	1.46185e-07	0.000193103	2.59746	2.50221	1.26422	1	1	0
1441	MSPI0406S00861737	SPPL2B	6.04101e-19	0	1.46185e-07	0.000193103	2.59746	2.50221	1.26422	1	1	0
1442	MSPI0406S00862013		3.24072e-19	0.0371844	0.0681686	0	0.663345	0.996678	2.57813	0	0	1
1443	MSPI0406S00862271	DIRAS1	1.63654e-15	1	0.0101481	4.60771e-08	0.040814	1.58967	2.10932	0	0	1
1444	MSPI0406S00862272	DIRAS1	4.22285e-18	0.0806712	0.155236	2.10521e-05	-0.694061	1.00684	1.59344	0	0	1
1445	MSPI0406S00862361	SGTA	1.38125e-12	4.86837e-10	1.38425e-06	1.53543e-13	1.20431	1.5559	1.65896	0	1	1
1445	MSPI0406S00862361	THOP1	1.38125e-12	4.86837e-10	1.38425e-06	1.53543e-13	1.20431	1.5559	1.65896	0	1	1
1446	MSPI0406S00862362	SGTA	1.57986e-15	0	2.48648e-05	7.5085e-12	1.63235	1.24825	1.41857	1	0	0
1446	MSPI0406S00862362	THOP1	1.57986e-15	0	2.48648e-05	7.5085e-12	1.63235	1.24825	1.41857	1	0	0
1447	MSPI0406S00862458	ZNF556	7.87678e-06	0.130204	0.0802141	4.93598e-05	0.661125	1.21068	1.64268	0	0	1
1448	MSPI0406S00864844	UBXN6	2.32265e-18	5.21312e-05	0.000485964	0	1.55019	2.35164	3.78317	1	1	1
1449	MSPI0406S00864845	UBXN6	9.178e-13	4.58507e-06	0.0483161	7.56281e-13	1.55757	1.29001	2.88925	1	0	1
1450	MSPI0406S00864878	HDGF2	1.25438e-10	0.325568	0.0879418	8.57534e-08	0.457149	1.067	1.88699	0	0	1
1451	MSPI0406S00865599	KDM4B	1.55734e-05	5.05713e-06	0.359108	0.000881962	1.85696	0.98196	1.64773	1	0	1
1452	MSPI0406S00865742	KDM4B	1.1845e-19	0.386345	2.34774e-06	1.79622e-12	0.268887	1.50825	1.59738	0	1	1
1453	MSPI0406S00866032	PTPRS	2.20413e-10	1.45292e-06	0.059799	2.71275e-11	1.30935	1.00272	2.07831	0	0	1
1454	MSPI0406S00866366		0.00262598	0.0798069	0.00225803	0.159979	0.699891	1.77329	0.700786	0	1	0
1455	MSPI0406S00867771	GPR108	3.57306e-09	0.0522301	0.0139546	7.83136e-08	0.702604	1.38435	1.88581	0	0	1
1455	MSPI0406S00867771	TRIP10	3.57306e-09	0.0522301	0.0139546	7.83136e-08	0.702604	1.38435	1.88581	0	0	1
1456	MSPI0406S00868718		8.19916e-07	0.000257763	9.15879e-06	1.0315e-05	0.824458	1.58805	1.09414	0	1	0
1457	MSPI0406S00868808	C19orf59	1.22718e-09	0.0355522	0.00608305	3.23251e-08	0.576231	1.1694	1.50671	0	0	1
1457	MSPI0406S00868808	TRAPPC5	1.22718e-09	0.0355522	0.00608305	3.23251e-08	0.576231	1.1694	1.50671	0	0	1
1458	MSPI0406S00869093	MAP2K7	7.36888e-05	0.040701	0.0114717	0.000212664	0.893901	1.74746	1.66039	0	0	1
1459	MSPI0406S00869298	CCL25	6.13207e-08	0.556819	0.481367	8.95428e-06	0.387264	0.720337	1.7075	0	0	1
1460	MSPI0406S00870491		1.61463e-07	9.6168e-07	5.64557e-05	0.00189612	1.28229	1.76847	0.936404	0	1	0
1461	MSPI0406S00870943	OLFM2	1.30022e-07	9.08171e-06	0.11064	2.38554e-08	1.24743	0.925908	1.77487	0	0	1
1462	MSPI0406S00870944	OLFM2	5.98413e-08	0.000104075	0.0461202	9.24706e-09	1.08493	0.996116	1.69683	0	0	1
1463	MSPI0406S00871361	ICAM4	1.47511e-09	0.117947	0.000166623	7.7108e-07	0.577903	1.83667	1.66176	0	1	1
1464	MSPI0406S00871362	ICAM4	2.35154e-10	0.0251295	3.94042e-06	8.46069e-08	0.515293	1.53096	1.23997	0	1	0
1465	MSPI0406S00871690	S1PR5	8.18257e-15	2.85283e-10	2.55824e-07	0	1.08276	1.37547	1.57357	0	0	1
1466	MSPI0406S00873128	ACP5	1.09359e-09	1.37555e-08	0.000249835	1.3987e-10	1.42566	1.64118	1.83477	0	1	1
1467	MSPI0406S00873583	ZNF136	4.44787e-06	4.68622e-05	0.000193037	0.0603956	1.18213	1.84088	0.730564	0	1	0
1468	MSPI0406S00873968	C19orf56	6.48075e-13	9.71107e-11	4.25728e-07	5.67498e-13	1.21113	1.51739	1.63489	0	1	1
1468	MSPI0406S00873968	MAN2B1	6.48075e-13	9.71107e-11	4.25728e-07	5.67498e-13	1.21113	1.51739	1.63489	0	1	1
1468	MSPI0406S00873968	MORG1	6.48075e-13	9.71107e-11	4.25728e-07	5.67498e-13	1.21113	1.51739	1.63489	0	1	1
1469	MSPI0406S00874196	MAST1	1.22465e-07	3.1491e-08	8.06543e-05	2.95575e-06	1.57324	1.77835	1.46915	1	1	0
1469	MSPI0406S00874196	RTBDN	1.22465e-07	3.1491e-08	8.06543e-05	2.95575e-06	1.57324	1.77835	1.46915	1	1	0
1470	MSPI0406S00875117	MRI1	1.99884e-11	0.0154792	1.19417e-06	2.0635e-08	0.757743	2.22788	1.81146	0	1	1
1471	MSPI0406S00875551	LOC113230	1.09471e-11	0.097548	0.00100156	6.52591e-09	0.520201	1.46308	1.68325	0	0	1
1472	MSPI0406S00875651		4.15142e-18	1.29414e-06	0.691985	0.398402	1.51851	0.508378	-0.472449	1	0	0
1473	MSPI0406S00876082	PTGER1	2.72439e-12	1.57322e-11	8.59158e-05	3.30446e-13	1.45891	1.37956	1.80101	0	0	1
1474	MSPI0406S00876141	DNAJB1	2.1072e-10	8.84969e-09	0.940284	2.13961e-06	2.25419	0.458368	2.00011	1	0	1
1475	MSPI0406S00876486	SLC1A6	4.44492e-12	1.6744e-11	3.6504e-06	0.000337956	-1.59551	-1.68082	-0.929064	1	1	0
1476	MSPI0406S00876882	AKAP8L	2.80606e-05	0.224511	3.53277e-05	0.0649741	0.469022	1.8879	0.710722	0	1	0
1477	MSPI0406S00877200	CYP4F11	0.000176472	0.000460334	0.346775	0.281161	1.64722	1.09575	0.816463	1	0	0
1478	MSPI0406S00877662		1.31745e-15	0.287636	2.06144e-05	2.73998e-10	0.362769	1.6309	1.69383	0	1	1
1479	MSPI0406S00877663		1.63637e-12	0.000750943	6.02957e-06	1.83459e-11	0.894064	1.87377	1.93208	0	1	1
1480	MSPI0406S00879026	PGLS	1.0697e-12	3.14911e-13	0.00366239	2.13202e-11	1.82898	1.22728	1.82861	1	0	1
1481	MSPI0406S00879028	PGLS	1.90097e-16	0.674512	0.129166	7.56124e-11	0.230911	0.738916	1.73114	0	0	1
1482	MSPI0406S00880245		2.59694e-10	0.0619675	2.19032e-05	3.04539e-07	0.553742	1.78988	1.45835	0	1	0
1483	MSPI0406S00880439	C19orf60	4.60407e-05	2.09362e-05	0.104536	0.0217323	1.55494	1.20181	1.06019	1	0	0
1484	MSPI0406S00881099	SLC25A42	4.2493e-12	7.64716e-08	0.76276	1.13515e-11	2.39425	0.710618	3.5273	1	0	1
1485	MSPI0406S00881769	LPAR2	1.88935e-17	1.51387e-05	0.000124658	1	-1.20828	1.75385	-0.186429	0	1	0
1486	MSPI0406S00884626	PLEKHF1	2.95869e-09	0.038276	0.10579	4.01662e-08	0.58196	0.808186	1.53006	0	0	1
1487	MSPI0406S00886365	ANKRD27	2.47865e-15	0.145648	0.00875256	1.17234e-11	0.570602	1.44065	2.37048	0	0	1
1487	MSPI0406S00886365	RGS9BP	2.47865e-15	0.145648	0.00875256	1.17234e-11	0.570602	1.44065	2.37048	0	0	1
1488	MSPI0406S00886962	CEBPA	6.78142e-13	0.000114761	0.220781	7.93471e-13	1.24966	0.859551	2.54426	0	0	1
1488	MSPI0406S00886962	LOC80054	6.78142e-13	0.000114761	0.220781	7.93471e-13	1.24966	0.859551	2.54426	0	0	1
1489	MSPI0406S00888298	FXYD3	1.76886e-11	4.42016e-05	0.000978133	4.48535e-12	1.0633	1.4313	2.02625	0	0	1
1490	MSPI0406S00888308		2.40495e-05	0.00184315	0.00151324	2.99046e-05	1.05637	1.75111	1.57534	0	1	1
1491	MSPI0406S00888334	FXYD1	4.89326e-22	0.678511	1	3.40047e-14	0.168561	-0.142296	1.5042	0	0	1
1491	MSPI0406S00888334	FXYD7	4.89326e-22	0.678511	1	3.40047e-14	0.168561	-0.142296	1.5042	0	0	1
1491	MSPI0406S00888334	LGI4	4.89326e-22	0.678511	1	3.40047e-14	0.168561	-0.142296	1.5042	0	0	1
1492	MSPI0406S00888338	FXYD1	6.85637e-09	5.7211e-08	8.48559e-05	0.0295952	-2.04214	-2.44191	-1.04755	1	1	0
1492	MSPI0406S00888338	FXYD7	6.85637e-09	5.7211e-08	8.48559e-05	0.0295952	-2.04214	-2.44191	-1.04755	1	1	0
1492	MSPI0406S00888338	LGI4	6.85637e-09	5.7211e-08	8.48559e-05	0.0295952	-2.04214	-2.44191	-1.04755	1	1	0
1493	MSPI0406S00888444	HAMP	1.93887e-11	0.250037	2.42498e-05	4.09796e-07	0.361391	1.58747	1.28348	0	1	0
1494	MSPI0406S00888451	MAG	2.28264e-11	0.872992	2.67909e-06	0.000103754	0.153051	1.56049	0.918608	0	1	0
1495	MSPI0406S00888452	MAG	4.56048e-06	0.785983	0.00466638	0.9994	-0.254403	1.51864	0.218799	0	1	0
1496	MSPI0406S00888534	FFAR1	0.000308659	1	0.00203907	1	0.108388	1.83121	0.130932	0	1	0
1497	MSPI0406S00888744	ATP4A	5.31528e-08	5.72057e-06	7.95482e-06	1.11734e-07	1.21847	1.9421	1.62423	0	1	1
1498	MSPI0406S00889380	POLR2I	3.40824e-08	9.1097e-07	1.89568e-05	0.00172711	-1.37769	-1.84504	-0.947839	0	1	0
1498	MSPI0406S00889380	TBCB	3.40824e-08	9.1097e-07	1.89568e-05	0.00172711	-1.37769	-1.84504	-0.947839	0	1	0
1499	MSPI0406S00889494	ZNF146	3.85198e-06	0.202962	0.0406995	3.60376e-05	-0.562843	-1.27956	-1.53521	0	0	1
1499	MSPI0406S00889494	ZNF565	3.85198e-06	0.202962	0.0406995	3.60376e-05	-0.562843	-1.27956	-1.53521	0	0	1
1500	MSPI0406S00890903	DPF1	0.000279441	0.00148239	0.00110902	0.0693016	1.00458	1.6496	0.742249	0	1	0
1501	MSPI0406S00891748	SIRT2	0.000244225	0.00133539	0.000605464	0.0164281	1.58056	2.61272	1.39835	1	1	0
1502	MSPI0406S00893011	PRX	4.63183e-15	0	0.0457087	1.22841e-06	1.66345	0.779315	1.10994	1	0	0
1503	MSPI0406S00893076	BLVRB	7.41441e-13	1.35405e-11	1.23168e-06	0.00164711	-2.09211	-2.37429	-1.13423	1	1	0
1503	MSPI0406S00893076	SPTBN4	7.41441e-13	1.35405e-11	1.23168e-06	0.00164711	-2.09211	-2.37429	-1.13423	1	1	0
1504	MSPI0406S00894255	RPS19	9.05369e-09	1.05142e-08	1.07508e-05	4.24702e-08	1.40427	1.74129	1.56643	0	1	1
1505	MSPI0406S00894503	ZNF574	9.38364e-13	0.000818627	0.00339317	3.99347e-12	0.678446	1.00229	1.56804	0	0	1
1506	MSPI0406S00894561		9.95432e-05	0.0714121	0.00627829	0.000478374	0.689858	1.56892	1.30931	0	1	0
1507	MSPI0406S00894695	CIC	1.6113e-09	9.83163e-10	3.31217e-05	0.000922196	-1.6433	-1.78845	-1.03153	1	1	0
1508	MSPI0406S00894984	CEACAM8	9.39557e-17	1.94867e-14	3.23328e-08	0	1.28526	1.40536	1.64462	0	0	1
1509	MSPI0406S00895346		1.76701e-09	2.07382e-10	0.00776663	1.90996e-05	1.70122	1.25121	1.29037	1	0	0
1510	MSPI0406S00895442	IRGQ	1.33298e-15	8.26723e-09	3.62392e-10	0	0.868323	1.54266	1.42359	0	1	0
1511	MSPI0406S00895499	CADM4	3.72267e-10	3.26271e-08	0.000646996	0.135514	-2.21191	-2.31088	-0.87658	1	1	0
1512	MSPI0406S00895847		5.52863e-09	0.000334856	1.22433e-06	1.28612e-06	0.572181	1.69938	0.946902	0	1	0
1513	MSPI0406S00896081	BCL3	5.80291e-08	9.80904e-09	0.0813968	6.70185e-05	2.15171	1.31537	1.71565	1	0	1
1514	MSPI0406S00896734	MARK4	1.65297e-11	5.4532e-06	5.86981e-06	6.38301e-12	0.973219	1.52681	1.6379	0	1	1
1515	MSPI0406S00896858	KLC3	2.50373e-09	5.93777e-09	0.0146996	0.0128368	-2.65289	-2.02098	-1.42577	1	0	0
1516	MSPI0406S00897425	SIX5	2.15423e-09	0.00948139	1	4.19102e-08	0.727721	0.0823638	1.60257	0	0	1
1517	MSPI0406S00897489	RSHL1	6.6302e-10	0.0465754	0.00619549	3.44639e-08	0.55961	1.18645	1.53062	0	0	1
1518	MSPI0406S00897543	FOXA3	2.2041e-10	1.6806e-09	0.000307302	3.29959e-11	1.24745	1.2734	1.57697	0	0	1
1518	MSPI0406S00897543	SYMPK	2.2041e-10	1.6806e-09	0.000307302	3.29959e-11	1.24745	1.2734	1.57697	0	0	1
1519	MSPI0406S00897976		1.11664e-12	9.96171e-05	2.12523e-06	6.36977e-12	1.01706	1.93586	2.00687	0	1	1
1520	MSPI0406S00897977		2.16918e-11	4.85968e-06	1.39493e-06	6.3744e-11	1.26068	2.14507	2.11846	0	1	1
1521	MSPI0406S00898776	ZC3H4	1.02931e-07	1.93147e-06	0.646059	0.15124	2.11869	0.804606	0.956728	1	0	0
1522	MSPI0406S00899216	KPTN	7.99285e-13	3.1885e-07	0.285983	1	2.00658	1.02796	0.0504141	1	0	0
1523	MSPI0406S00899982	LIG1	9.84985e-15	0	1.36048e-07	4.56829e-06	-1.83966	-1.83679	-1.17714	1	1	0
1524	MSPI0406S00900238	GRIN2D	2.06934e-08	0.000248734	8.01899e-06	1.56294e-07	0.83063	1.62129	1.3442	0	1	0
1524	MSPI0406S00900238	KDELR1	2.06934e-08	0.000248734	8.01899e-06	1.56294e-07	0.83063	1.62129	1.3442	0	1	0
1525	MSPI0406S00900304	GRWD1	1.05003e-10	3.09694e-09	0.175068	1.93189e-10	1.2203	0.611063	1.51943	0	0	1
1526	MSPI0406S00900713	RASIP1	1.48156e-15	0	2.92919e-05	3.40047e-14	1.61421	1.27553	1.69822	1	0	1
1527	MSPI0406S00900929	NUCB1	5.35073e-17	8.66149e-06	8.25984e-13	3.52627e-13	0.738416	1.98209	1.3844	0	1	0
1527	MSPI0406S00900929	TULP2	5.35073e-17	8.66149e-06	8.25984e-13	3.52627e-13	0.738416	1.98209	1.3844	0	1	0
1528	MSPI0406S00902144	MED25	2.0956e-13	0.00219039	1	8.43485e-11	1.45101	-0.353856	3.35852	0	0	1
1529	MSPI0406S00902145	MED25	2.52232e-14	0.000279335	0.979213	1.10523e-11	1.9479	-0.603013	4.0509	1	0	1
1530	MSPI0406S00902300	ATF5	2.24131e-18	0.512378	0.113516	1.39921e-12	0.276078	0.754435	1.88447	0	0	1
1530	MSPI0406S00902300	IL4I1	2.24131e-18	0.512378	0.113516	1.39921e-12	0.276078	0.754435	1.88447	0	0	1
1530	MSPI0406S00902300	NUP62	2.24131e-18	0.512378	0.113516	1.39921e-12	0.276078	0.754435	1.88447	0	0	1
1531	MSPI0406S00902789	POLD1	1.32035e-08	2.2272e-06	0.643462	0.417044	1.63806	0.625786	0.54183	1	0	0
1532	MSPI0406S00902844	SPIB	3.2321e-11	1.456e-11	5.69589e-06	6.35756e-05	-1.60504	-1.7469	-1.07575	1	1	0
1533	MSPI0406S00903208	SHANK1	1.97181e-05	2.87076e-05	0.0114956	0.0653099	-1.62832	-1.74577	-0.958901	1	0	0
1534	MSPI0406S00903215	CLEC11A	1.75159e-14	1.75322e-11	3.78462e-05	0	1.19597	1.17495	1.67808	0	0	1
1535	MSPI0406S00903600	SIGLEC9	2.05182e-18	4.64654e-05	0.00136948	0	1.0574	1.55938	2.6302	0	1	1
1536	MSPI0406S00903676	CD33	3.78711e-09	2.34624e-06	1	0.275555	1.62098	0.0112847	0.629125	1	0	0
1537	MSPI0406S00903784	CLDND2	2.45822e-15	4.41465e-09	0.477179	0.0174573	1.68245	-0.581265	0.825817	1	0	0
1537	MSPI0406S00903784	NKG7	2.45822e-15	4.41465e-09	0.477179	0.0174573	1.68245	-0.581265	0.825817	1	0	0
1538	MSPI0406S00903806	LIM2	1.65368e-13	4.46089e-13	4.5247e-08	2.13593e-13	-1.48052	-1.79169	-1.70242	0	1	1
1539	MSPI0406S00903807	LIM2	1.2698e-05	0.150077	0.00135494	0.000607577	0.558529	1.66462	1.22541	0	1	0
1540	MSPI0406S00905281	ZNF331	8.62754e-09	0.000172352	0.000141249	9.32583e-09	0.911778	1.50831	1.56289	0	1	1
1541	MSPI0406S00905755	CACNG7	1.6273e-07	0.0164739	0.00136732	1.30994e-06	0.871054	1.82095	1.81697	0	1	1
1542	MSPI0406S00906184	LILRB2	4.69186e-18	0	1.47006e-09	0	1.66904	1.83352	2.04381	1	1	1
1543	MSPI0406S00906287	LAIR1	1.41089e-12	4.12327e-13	0.00187631	6.67822e-06	2.4337	1.75365	1.6682	1	1	1
1544	MSPI0406S00906572	LILRB4	9.24948e-14	1	0.000718997	9.46365e-06	-0.0787439	1.8984	1.67324	0	1	1
1545	MSPI0406S00906934	EPS8L1	0.000250723	0.621185	0.000987289	0.220662	0.28883	1.56771	0.530652	0	1	0
1546	MSPI0406S00907047	C19orf51	3.32662e-11	9.59724e-08	7.33415e-05	3.02804e-12	1.33316	1.63103	2.00914	0	1	1
1546	MSPI0406S00907047	TNNI3	3.32662e-11	9.59724e-08	7.33415e-05	3.02804e-12	1.33316	1.63103	2.00914	0	1	1
1547	MSPI0406S00907355	IL11	2.97051e-12	1.26386e-10	4.07385e-05	0.0164523	-1.81323	-1.87125	-0.832187	1	1	0
1548	MSPI0406S00907356	IL11	1.07407e-10	5.85043e-09	0.00163881	8.68936e-12	1.17639	1.07201	1.53775	0	0	1
1549	MSPI0406S00907444	ISOC2	1.47332e-07	0.0400766	0.00389697	1.5461e-06	0.658021	1.41175	1.51561	0	0	1
1550	MSPI0406S00907853	NLRP11	4.08446e-07	0.000310395	9.68488e-07	5.14662e-05	1.26277	2.72875	1.57883	0	1	1
1550	MSPI0406S00907853	NLRP4	4.08446e-07	0.000310395	9.68488e-07	5.14662e-05	1.26277	2.72875	1.57883	0	1	1
1551	MSPI0406S00907922	NLRP8	2.87185e-13	1.6707e-07	3.94358e-08	4.54582e-13	0.964887	1.66104	1.56668	0	1	1
1552	MSPI0406S00908339	ZNF667	0.001071	0.210888	0.00120017	0.146332	-0.632867	-2.09566	-0.80541	0	1	0
1553	MSPI0406S00908806		1.70168e-05	0.272132	0.000209564	1	0.545095	2.15767	0.0494414	0	1	0
1554	MSPI0406S00909523	A1BG	2.6144e-10	1.33445e-05	1.2745e-09	1.59686e-05	0.581018	1.78393	0.714488	0	1	0
1554	MSPI0406S00909523	NCRNA00181	2.6144e-10	1.33445e-05	1.2745e-09	1.59686e-05	0.581018	1.78393	0.714488	0	1	0
1555	MSPI0406S00909524	A1BG	2.33156e-14	0.0100195	4.28269e-10	1.21712e-08	0.461164	1.72776	1.06389	0	1	0
1555	MSPI0406S00909524	NCRNA00181	2.33156e-14	0.0100195	4.28269e-10	1.21712e-08	0.461164	1.72776	1.06389	0	1	0
1556	MSPI0406S00909943	NRSN2	0.00925911	0.0481771	0.0098325	0.199166	-0.831617	-1.66369	-0.717703	0	1	0
1557	MSPI0406S00910358	ANGPT4	1.10664e-05	2.67372e-05	0.00586358	0.0893572	1.68041	1.92663	0.945929	1	1	0
1558	MSPI0406S00910359	ANGPT4	2.83866e-06	1.31251e-05	0.0183884	0.178609	2.04251	2.01409	0.96509	1	0	0
1559	MSPI0406S00911050	TGM6	9.27889e-06	2.18834e-05	0.00316984	0.0722204	1.22273	1.54595	0.715014	0	1	0
1560	MSPI0406S00911238	EBF4	5.70298e-07	1.51584e-07	0.00095769	2.14985e-06	1.34412	1.50536	1.38721	0	1	0
1561	MSPI0406S00911934	C20orf27	2.47624e-09	1.25873e-09	2.26393e-05	7.19033e-09	1.9665	2.24679	2.11948	1	1	1
1562	MSPI0406S00912285	ADRA1D	7.78612e-13	0.223178	0.0343386	6.58244e-08	0.472549	1.12493	1.95346	0	0	1
1563	MSPI0406S00912738	CDS2	3.6248e-21	3.88384e-11	1	1	2.73703	0.300316	-0.0871589	1	0	0
1563	MSPI0406S00912738	PCNA	3.6248e-21	3.88384e-11	1	1	2.73703	0.300316	-0.0871589	1	0	0
1564	MSPI0406S00913485	PLCB1	0.00230682	0.00858078	0.0062529	0.167182	-1.01108	-1.72694	-0.739741	0	1	0
1565	MSPI0406S00914435		1.57425e-13	2.06327e-06	1.70703e-12	1.21653e-08	0.980436	2.49037	1.33485	0	1	0
1566	MSPI0406S00914641	MACROD2	1.76332e-05	0.0134132	0.000142195	0.000521607	-0.929946	-2.21605	-1.37737	0	1	0
1567	MSPI0406S00914902		2.17019e-09	0.0283112	5.3096e-06	1	0.88423	2.89633	-0.125264	0	1	0
1568	MSPI0406S00915159	PCSK2	5.66396e-06	2.71949e-06	0.0882512	0.0012336	1.59442	1.10689	1.2558	1	0	0
1569	MSPI0406S00917201	SSTR4	3.14946e-07	0.0140937	0.00107008	2.53584e-06	0.912124	1.91416	1.82054	0	1	1
1570	MSPI0406S00917409	NAPB	0.000131005	0.000790272	0.00152786	0.115753	-1.12788	-1.6938	-0.71555	0	1	0
1571	MSPI0406S00917421	CST11	2.7765e-07	1	5.74164e-05	0.950855	0.115727	1.50512	-0.183277	0	1	0
1572	MSPI0406S00917430	CST8	7.41011e-14	1	3.58915e-11	0.235306	0.127377	2.65275	0.462987	0	1	0
1573	MSPI0406S00917463	CST9	1.01977e-07	0.0100596	4.33956e-07	0.00135955	0.710381	2.172	0.966759	0	1	0
1574	MSPI0406S00917499	CST4	3.02302e-12	1.04102e-07	1	0.456706	1.59707	-0.00236131	0.447083	1	0	0
1575	MSPI0406S00918187		4.63956e-10	0.0720883	8.74649e-09	0.0006137	0.540835	2.37143	1.0178	0	1	0
1576	MSPI0406S00918563	ZNF337	3.42926e-14	0.00676883	0.132447	3.35157e-09	-1.26629	1.3746	-2.94197	0	0	1
1577	MSPI0406S00919227	DUSP15	1.34371e-12	0.000104479	5.84178e-06	5.10893e-12	1.52865	2.89306	3.06759	1	1	1
1577	MSPI0406S00919227	TTLL9	1.34371e-12	0.000104479	5.84178e-06	5.10893e-12	1.52865	2.89306	3.06759	1	1	1
1578	MSPI0406S00919448	PLAGL2	3.20358e-09	7.77898e-10	0.000362366	9.043e-05	1.65734	1.81587	1.21277	1	1	0
1578	MSPI0406S00919448	POFUT1	3.20358e-09	7.77898e-10	0.000362366	9.043e-05	1.65734	1.81587	1.21277	1	1	0
1579	MSPI0406S00920203	C20orf70	6.72173e-06	0.143771	8.08345e-05	0.0034583	0.465707	1.65411	0.87472	0	1	0
1580	MSPI0406S00920204	C20orf70	0.000181188	0.269953	0.000659891	0.0444408	0.536741	2.01717	0.911017	0	1	0
1581	MSPI0406S00920648	ZNF341	5.60922e-06	0.0604792	0.0217475	1.57746e-05	0.805438	1.53231	1.78251	0	0	1
1582	MSPI0406S00922088	PHF20	0.00880123	0.0462104	0.00965237	0.164024	-0.79809	-1.60378	-0.720864	0	1	0
1583	MSPI0406S00922946	C20orf117	2.48992e-10	7.91715e-07	2.40438e-07	7.61213e-10	1.8507	3.1294	2.65217	1	1	1
1584	MSPI0406S00922947	C20orf117	2.94755e-06	0.0161889	0.00212271	7.64892e-06	0.8996	1.79233	1.69742	0	1	1
1585	MSPI0406S00923190	C20orf132	3.10675e-12	5.14309e-11	8.06543e-05	0.0116474	-1.96692	-1.85943	-0.895251	1	1	0
1585	MSPI0406S00923190	RPN2	3.10675e-12	5.14309e-11	8.06543e-05	0.0116474	-1.96692	-1.85943	-0.895251	1	1	0
1586	MSPI0406S00923797		6.79477e-12	0.000128295	0.17981	5.99609e-12	0.90168	0.675842	1.81099	0	0	1
1587	MSPI0406S00923825	TGM2	2.12184e-11	0.00962863	0.00266749	3.09014e-10	0.796911	1.45384	2.00146	0	0	1
1588	MSPI0406S00926375		5.51674e-13	0.000554793	1.07261e-07	5.21968e-11	0.846717	2.02429	1.75113	0	1	1
1589	MSPI0406S00926946	UBE2C	6.0818e-16	5.63721e-08	2.68503e-08	0	1.40671	2.07186	2.28196	0	1	1
1590	MSPI0406S00927023	CTSA	1.49364e-10	6.92353e-06	7.5323e-06	8.53741e-11	1.29704	2.10755	2.13397	0	1	1
1590	MSPI0406S00927023	NEURL2	1.49364e-10	6.92353e-06	7.5323e-06	8.53741e-11	1.29704	2.10755	2.13397	0	1	1
1591	MSPI0406S00927966	hCG_2018772	4.95402e-18	6.60423e-12	2.30189e-10	0	1.36418	1.95539	2.08284	0	1	1
1591	MSPI0406S00927966	ZMYND8	4.95402e-18	6.60423e-12	2.30189e-10	0	1.36418	1.95539	2.08284	0	1	1
1592	MSPI0406S00930043		1.86277e-11	0.000167753	0.0936423	1.37029e-11	1.41728	1.26821	2.88682	0	0	1
1593	MSPI0406S00933190	C20orf107	1.06741e-08	0.0253371	4.89345e-08	0.000702958	0.674047	2.38301	1.0721	0	1	0
1594	MSPI0406S00934136	PCK1	0.000702321	0.00133523	0.00313477	0.0105402	1.14031	1.78821	1.09023	0	1	0
1595	MSPI0406S00934137	PCK1	1.22342e-08	4.326e-07	9.32027e-07	6.44643e-08	1.46292	2.29944	1.76022	0	1	1
1596	MSPI0406S00934592	C20orf85	1.69569e-05	0.0698189	0.00384373	0.000112705	0.699731	1.63839	1.43367	0	1	0
1597	MSPI0406S00935140	GNAS	1.37819e-10	2.07069e-10	7.3219e-06	1.09176e-10	1.42365	1.59157	1.63052	0	1	1
1597	MSPI0406S00935140	GNAS1	1.37819e-10	2.07069e-10	7.3219e-06	1.09176e-10	1.42365	1.59157	1.63052	0	1	1
1598	MSPI0406S00935221	CTSZ	2.32501e-05	7.54493e-05	1	0.0735403	1.57379	0.379164	0.97374	1	0	0
1599	MSPI0406S00935370	EDN3	8.68807e-06	0.00211881	0.00255933	5.56952e-06	0.961661	1.54989	1.51146	0	1	1
1600	MSPI0406S00937301	LSM14B	3.93603e-10	2.89468e-10	6.04576e-06	1.13243e-09	1.58085	1.79993	1.70263	1	1	1
1601	MSPI0406S00937312		1.14654e-09	4.88661e-10	0.2093	3.22531e-05	1.97648	0.901556	1.50394	1	0	1
1602	MSPI0406S00937385	GTPBP5	4.75093e-05	0.177225	0.168885	0.000152023	0.719003	1.21269	1.78335	0	0	1
1603	MSPI0406S00937435		2.15561e-11	0.00680599	1.42936e-07	2.19201e-08	0.626353	1.81181	1.35821	0	1	0
1604	MSPI0406S00937436		2.24681e-09	0.656234	0.000193841	4.45791e-05	0.250139	1.51221	1.1424	0	1	0
1605	MSPI0406S00939233	PTK6	1.04559e-11	9.43258e-10	0.000510449	0.111464	-1.72346	-1.62504	-0.622777	1	1	0
1606	MSPI0406S00939726		9.27901e-09	0.00164862	6.98626e-06	1.95785e-07	2.42643	5.41463	4.35812	1	1	1
1607	MSPI0406S00939836	UCKL1	1.63018e-07	0.170451	3.23814e-07	0.360514	0.434763	2.01412	0.401804	0	1	0
1607	MSPI0406S00939836	UCKL1AS	1.63018e-07	0.170451	3.23814e-07	0.360514	0.434763	2.01412	0.401804	0	1	0
1608	MSPI0406S00942483	APP	2.00564e-10	1.80343e-07	0.497678	0.381901	1.65333	0.65538	0.508652	1	0	0
1609	MSPI0406S00942484	APP	4.20402e-13	0.517377	0.0616751	7.74638e-09	0.389734	1.19448	2.16409	0	0	1
1610	MSPI0406S00942958	RWDD2B	7.40175e-06	0.000203798	0.566582	4.33921e-06	1.48368	0.761502	2.03227	0	0	1
1610	MSPI0406S00942958	USP16	7.40175e-06	0.000203798	0.566582	4.33921e-06	1.48368	0.761502	2.03227	0	0	1
1611	MSPI0406S00943163	GRIK1	4.38698e-10	3.51023e-11	0.00257283	1.81739e-07	1.52401	1.17323	1.36591	1	0	0
1612	MSPI0406S00943208	CLDN8	1.36355e-10	7.0473e-08	1.58236e-07	1.55358e-10	0.995471	1.52008	1.31302	0	1	0
1613	MSPI0406S00943714	SOD1	4.98664e-10	7.05439e-09	6.31462e-07	3.95433e-10	1.15852	1.60444	1.43475	0	1	0
1614	MSPI0406S00943742	SFRS15	5.8841e-13	1.00178e-12	6.01309e-07	0.000232284	-1.62399	-1.79654	-0.93066	1	1	0
1615	MSPI0406S00944633	IFNGR2	6.82148e-07	0.0403495	1	3.80143e-06	0.775491	0.216628	1.72057	0	0	1
1616	MSPI0406S00946649	DSCR9	1.1115e-18	0	0.00153721	0.00354217	1.73679	1.09659	0.718235	1	0	0
1617	MSPI0406S00947092		1.37607e-07	7.08611e-05	1	0.812579	1.56531	0.347708	0.389824	1	0	0
1618	MSPI0406S00947093		7.74489e-26	1.30084e-09	1	0.0971983	2.13874	0.136501	-0.80062	1	0	0
1619	MSPI0406S00948659	C21orf129	4.75472e-08	0.00448538	4.83596e-05	1	1.01432	2.20042	0.0746863	0	1	0
1619	MSPI0406S00948659	C21orf22	4.75472e-08	0.00448538	4.83596e-05	1	1.01432	2.20042	0.0746863	0	1	0
1620	MSPI0406S00948660	C21orf129	0.000921663	0.0109518	0.00617545	0.460636	0.911463	1.58633	0.48647	0	1	0
1620	MSPI0406S00948660	C21orf22	0.000921663	0.0109518	0.00617545	0.460636	0.911463	1.58633	0.48647	0	1	0
1621	MSPI0406S00948682		9.79399e-08	0.00821021	1.54901e-05	4.97407e-06	0.680014	1.69517	1.21619	0	1	0
1622	MSPI0406S00948834		8.62532e-19	1.85757e-12	1	0	-1.75042	0.103011	-2.3205	1	0	1
1623	MSPI0406S00949084	C21orf128	3.63402e-09	5.35806e-05	1.50852e-06	2.75845e-08	1.03865	2.03468	1.60768	0	1	1
1624	MSPI0406S00949289	TFF3	1.53077e-15	0.000582202	1.70703e-12	1.08831e-09	0.666736	2.23822	1.30532	0	1	0
1625	MSPI0406S00949533		1.62053e-23	0.568005	0.00641098	2.38538e-10	-0.35769	1.52741	2.32627	0	1	1
1626	MSPI0406S00949617		0.000307016	0.221178	0.00669841	1	0.732809	2.11225	-0.0357823	0	1	0
1627	MSPI0406S00950474	SIK1	1.46345e-14	0	4.3755e-07	1.61378e-08	2.63524	2.53372	1.98309	1	1	1
1628	MSPI0406S00950538	C21orf84	2.49592e-10	3.04036e-08	0.0631893	0.0712295	1.77509	1.11648	0.76173	1	0	0
1629	MSPI0406S00950539	C21orf84	6.98507e-12	3.85536e-10	0.157094	0.0422114	1.59079	0.769042	0.679209	1	0	0
1630	MSPI0406S00950720		2.45248e-15	0	0.000331215	1.41132e-10	2.39006	1.6769	1.96279	1	1	1
1631	MSPI0406S00951044		3.10595e-14	1.99072e-05	0.192694	6.14041e-14	1.41882	0.946059	2.88805	0	0	1
1632	MSPI0406S00951069		1.04042e-15	0.458591	2.55093e-08	0.0932437	-0.332505	2.40256	0.619866	0	1	0
1633	MSPI0406S00951532		7.40694e-09	1.00003e-07	0.0316582	0.0816633	-1.55176	-1.16836	-0.701765	1	0	0
1634	MSPI0406S00951558	TRPM2	1.75141e-11	0.000670396	2.97848e-05	1.2968e-10	1.12471	2.16318	2.32398	0	1	1
1635	MSPI0406S00951682	LRRC3	9.77263e-07	0.0293774	1	2.13009e-05	0.92372	0.28462	1.95809	0	0	1
1636	MSPI0406S00951683	LRRC3	5.77153e-10	0.000366529	0.123745	3.00649e-10	1.37745	1.17798	2.63069	0	0	1
1637	MSPI0406S00951757	C21orf90	0.000312436	0.268956	0.002565	1	0.471711	1.57586	0.0558893	0	1	0
1638	MSPI0406S00951838	KRTAP10-6	1.51452e-15	1	0.425516	1.28799e-08	0.0380687	0.893339	2.5778	0	0	1
1639	MSPI0406S00952877	SLC19A1	4.07128e-06	0.000633335	0.000906694	0.320916	1.19376	1.73006	0.532246	0	1	0
1640	MSPI0406S00953425	FTCD	6.11021e-07	0.587541	0.000458833	0.00389495	0.267375	1.53562	0.855825	0	1	0
1641	MSPI0406S00953455		1.23256e-06	0.000115415	1.14807e-05	2.27324e-05	0.900063	1.6384	1.1363	0	1	0
1642	MSPI0406S00953456		1.42466e-15	4.84778e-09	4.28269e-10	0	0.923331	1.57392	1.47986	0	1	0
1643	MSPI0406S00953500	LSS	0.000159011	0.000529663	0.00209332	0.078137	-1.61675	-2.3286	-1.08131	1	1	0
1643	MSPI0406S00953500	MCM3APAS	0.000159011	0.000529663	0.00209332	0.078137	-1.61675	-2.3286	-1.08131	1	1	0
1644	MSPI0406S00955077		5.46633e-13	0.00998975	1.19185e-10	2.66966e-07	0.661094	2.45671	1.36931	0	1	0
1645	MSPI0406S00955559	DGCR6	1.9833e-11	1.01816e-10	3.68723e-05	0.00273912	-1.54454	-1.61556	-0.844635	1	1	0
1646	MSPI0406S00956467		1.14542e-15	0.0105298	2.54192e-09	8.43797e-11	0.512201	1.78498	1.35906	0	1	0
1647	MSPI0406S00956518	COMT	7.00142e-14	1	2.14039e-10	1	-0.0758835	2.87804	0.0497975	0	1	0
1647	MSPI0406S00956518	TXNRD2	7.00142e-14	1	2.14039e-10	1	-0.0758835	2.87804	0.0497975	0	1	0
1648	MSPI0406S00956726	RANBP1	1.47299e-15	0	6.55481e-08	4.67229e-10	-1.68435	-1.63086	-1.31338	1	1	0
1648	MSPI0406S00956726	TRMT2A	1.47299e-15	0	6.55481e-08	4.67229e-10	-1.68435	-1.63086	-1.31338	1	1	0
1649	MSPI0406S00957950	MGC16703	2.29792e-16	0.999177	1	4.98007e-10	0.193518	0.247948	2.45106	0	0	1
1649	MSPI0406S00957950	P2RX6	2.29792e-16	0.999177	1	4.98007e-10	0.193518	0.247948	2.45106	0	0	1
1650	MSPI0406S00959058		1.74649e-06	1.91374e-05	6.00317e-05	0.0302673	1.48804	2.33766	0.97555	0	1	0
1651	MSPI0406S00959304		3.43848e-14	0.00300356	0.000242135	1.23376e-12	0.881564	1.74098	2.29676	0	1	1
1652	MSPI0406S00959311		2.41827e-10	3.44605e-05	0.000758788	5.8774e-11	1.75117	2.39656	3.13159	1	1	1
1653	MSPI0406S00959511	BCR	5.00918e-13	2.00689e-13	2.76576e-05	8.25555e-06	1.55719	1.39444	1.04389	1	0	0
1654	MSPI0406S00959915	IGLL1	3.20359e-05	0.0216515	0.000119041	0.0013323	0.802746	1.99884	1.19273	0	1	0
1655	MSPI0406S00960120	SMARCB1	3.1223e-07	7.44424e-08	0.0127062	2.17422e-06	1.73859	1.4428	1.71015	1	0	1
1656	MSPI0406S00960121	SMARCB1	1.94397e-08	1.57843e-08	0.000194525	5.39774e-08	1.43579	1.53053	1.53498	0	1	1
1657	MSPI0406S00960189	DERL3	6.89745e-14	0.219422	1	3.19971e-10	0.388521	0.0990962	1.65074	0	0	1
1658	MSPI0406S00960452		7.8949e-09	5.44716e-08	0.00972555	0.0417859	1.59055	1.35368	0.78548	1	0	0
1659	MSPI0406S00960565	GGT5	3.86518e-13	5.2363e-14	0.000398241	1.16762e-11	1.7694	1.34554	1.73797	1	0	1
1660	MSPI0406S00960811	C22orf36	3.62668e-08	0.0319885	1.58123e-05	1.36882e-05	0.632146	1.86387	1.30338	0	1	0
1661	MSPI0406S00961227		8.34447e-14	4.43999e-08	1.35184e-06	0.779476	1.75007	2.51602	0.332759	1	1	0
1662	MSPI0406S00961437	LRP5L	1.96913e-09	0.000104489	3.25961e-05	8.66259e-09	1.09966	1.94773	1.86411	0	1	1
1663	MSPI0406S00962001		1.3305e-05	0.000179233	0.00327502	0.286179	1.13778	1.52343	0.53329	0	1	0
1664	MSPI0406S00962017	HPS4	1.26046e-07	0.00065122	0.000209336	0.973546	1.51499	2.56854	0.326995	1	1	0
1664	MSPI0406S00962017	SRRD	1.26046e-07	0.00065122	0.000209336	0.973546	1.51499	2.56854	0.326995	1	1	0
1665	MSPI0406S00963276	ZNRF3	2.10485e-10	0.000167189	0.458355	1	1.5662	0.891944	-0.29927	1	0	0
1666	MSPI0406S00963277	ZNRF3	4.0104e-09	7.02082e-09	4.13534e-06	0.000839345	-1.38234	-1.78213	-0.943232	0	1	0
1667	MSPI0406S00964243	LIF	3.73198e-05	0.0126897	0.0509355	2.0561e-05	1.06904	1.46683	1.90577	0	0	1
1668	MSPI0406S00964448	MTP18	1.29675e-05	5.22647e-06	0.0215832	0.000713735	1.57465	1.41256	1.33039	1	0	0
1669	MSPI0406S00964987	SMTN	1.8191e-11	1.84135e-11	1.65519e-06	2.40597e-05	2.46742	2.74251	1.705	1	1	1
1670	MSPI0406S00964990	SMTN	2.03887e-15	5.2363e-14	0.0288015	0.000279569	1.78281	0.914099	0.96631	1	0	0
1671	MSPI0406S00965034	INPP5J	2.93476e-06	0.00454504	0.00322245	3.24725e-06	0.904183	1.53676	1.57381	0	1	1
1672	MSPI0406S00965969	RFPL3	1.75273e-06	0.000394401	5.49758e-06	6.02737e-05	1.11062	2.2208	1.39013	0	1	0
1673	MSPI0406S00965994	C22orf28	1.19771e-06	0.00258611	0.00626348	1.3054e-06	1.11939	1.7038	1.96522	0	1	1
1674	MSPI0406S00966796	LARGE	2.16008e-14	0.000900612	0.097564	2.60929e-09	0.840493	-0.824713	1.6651	0	0	1
1675	MSPI0406S00968130		2.95231e-17	2.82617e-12	9.04922e-09	0	1.89156	2.43494	2.79701	1	1	1
1676	MSPI0406S00968131		1.11271e-20	7.64344e-13	9.21621e-07	0	1.48795	1.64038	2.49521	0	1	1
1677	MSPI0406S00968469	NCF4	2.89064e-12	2.87671e-08	1.89714e-07	3.75293e-12	1.0871	1.63554	1.61247	0	1	1
1678	MSPI0406S00968649		4.64879e-11	2.17254e-05	1.98396e-05	1.59118e-10	1.33252	2.19877	2.28947	0	1	1
1679	MSPI0406S00969015		1.11985e-13	2.00689e-13	0.00310513	0.000111898	1.59547	1.09104	0.93693	1	0	0
1680	MSPI0406S00969369	SH3BP1	2.80925e-11	0.000117704	0.000309574	2.40545e-11	0.902733	1.37783	1.75038	0	0	1
1681	MSPI0406S00969582	GCAT	1.25485e-11	5.85058e-08	3.29992e-05	1.66385e-12	1.16013	1.45917	1.75923	0	0	1
1681	MSPI0406S00969582	H1F0	1.25485e-11	5.85058e-08	3.29992e-05	1.66385e-12	1.16013	1.45917	1.75923	0	0	1
1682	MSPI0406S00969697	MICALL1	2.36957e-08	2.16243e-07	9.14924e-07	1.31296e-06	2.38255	3.74519	2.55439	1	1	1
1683	MSPI0406S00969698		3.73392e-06	2.17164e-05	2.63655e-05	0.000109912	2.29515	3.66602	2.36377	1	1	1
[truncated: 69 more rows]
