# Supplementary material for: Integrative Epigenomic Analysis Identifies Biomarkers and Therapeutic Targets in Adult B-Acute Lymphoblastic Leukemia
Source: Oxford University Press journal article supplement (doi:10.1158/2159-8290.cd-12-0208), 2012-10-30
Supplement: 21598290cd120208-sup-t10_xls_136k.xls [file 21598290cd120208-sup-t10_xls_136k.xls]

## Sheet: E2A-PBX1 methylation signature
Table S10.A. E2A-PBX1_methylation_signature
Index	Probeset_ID	p-value	FDR	log2.fold.change.pos.vs.neg	Gene		69 unique genes	Gene
1	MSPI0406S00100074	< 1e-07	< 1e-07	3.95997	ZNF512			ACOXL
2	MSPI0406S00748727	< 1e-07	< 1e-07	3.82628	CRYM			AHNAK
3	MSPI0406S00231177	< 1e-07	< 1e-07	3.68601	RASL11B			ARL4C
4	MSPI0406S00447330	< 1e-07	< 1e-07	3.43268	N/A			ASB8
5	MSPI0406S00785089	< 1e-07	< 1e-07	3.40757	N/A			ATAD4
6	MSPI0406S00765549	< 1e-07	< 1e-07	3.27472	SMPD3			B3GALT6
7	MSPI0406S00043283	5.4e-06	0.0020814	3.08817	ST6GALNAC3			BLK
8	MSPI0406S00100075	< 1e-07	< 1e-07	2.97809	ZNF512			C5orf34
9	MSPI0406S00785090	< 1e-07	0.0001567	2.94099	N/A			CALD1
10	MSPI0406S00313168	1.5e-06	0.0008397	2.93753	HIST1H1C			CDH13
11	MSPI0406S00421320	< 1e-07	< 1e-07	2.68521	EXTL3			CENPH
12	MSPI0406S00956518	< 1e-07	< 1e-07	2.64007	COMT			CLDND2
12	MSPI0406S00956518	< 1e-07	< 1e-07	2.64007	TXNRD2			COL5A2
13	MSPI0406S00159044	< 1e-07	< 1e-07	2.5928	N/A			COMT
14	MSPI0406S00069855	< 1e-07	< 1e-07	2.58655	MYBPH			CRYM
15	MSPI0406S00197488	3.5e-06	0.0015675	2.56376	N/A			CRYZ
16	MSPI0406S00060099	3.9e-06	0.0016374	2.48135	SLAMF1			CTDSP2
17	MSPI0406S00155756	< 1e-07	< 1e-07	2.47343	ARL4C			CYP4V2
18	MSPI0406S00124982	1.44e-05	0.0042615	2.46496	ACOXL			DEF6
19	MSPI0406S00028749	< 1e-07	0.0001567	2.46265	GJA4			EXTL3
20	MSPI0406S00039649	< 1e-07	< 1e-07	2.40303	N/A			FAM92B
21	MSPI0406S00841622	< 1e-07	0.0003266	2.35396	N/A			FNBP4
22	MSPI0406S00610289	2.5e-06	0.0011756	2.34385	ASB8			GDPD5
23	MSPI0406S00765550	< 1e-07	< 1e-07	2.34385	SMPD3			GJA4
24	MSPI0406S00841621	1.62e-05	0.0046451	2.33374	N/A			GLYCTK
25	MSPI0406S00315943	< 1e-07	9.04e-05	2.32619	LTA			GLYCTK1
25	MSPI0406S00315943	< 1e-07	9.04e-05	2.32619	TNF			HIST1H1C
26	MSPI0406S00527148	< 1e-07	< 1e-07	2.28511	WAPAL			HIST1H2BE
27	MSPI0406S00396920	6.6e-06	0.0023161	2.27782	CALD1			ISG20
28	MSPI0406S00271472	1e-06	0.0005735	2.26666	MAST4			KLHL24
29	MSPI0406S00881769	2.4e-06	0.0011516	2.23703	LPAR2			LHCGR
30	MSPI0406S00268188	5.9e-06	0.0022019	2.16301	C5orf34			LPAR2
31	MSPI0406S00471260	< 1e-07	0.0004702	2.15058	N/A			LTA
32	MSPI0406S00486208	< 1e-07	9.04e-05	2.08471	PHYHD1			MAK10
33	MSPI0406S00155755	< 1e-07	< 1e-07	2.06333	ARL4C			MAST4
34	MSPI0406S00318883	< 1e-07	< 1e-07	2.02686	DEF6			MED25
35	MSPI0406S00765518	3.78e-05	0.0091624	2.01282	N/A			MLKL
36	MSPI0406S00257196	9.7e-06	0.0030409	2.01134	TERT			MSR1
37	MSPI0406S00179678	2.4e-05	0.0062699	1.95638	GLYCTK			MTMR11
37	MSPI0406S00179678	2.4e-05	0.0062699	1.95638	GLYCTK1			MYBPH
38	MSPI0406S00640774	8.8e-06	0.0028343	1.91729	N/A			NECAB1
39	MSPI0406S00908806	3.68e-05	0.0090129	1.91407	N/A			NKG7
40	MSPI0406S00257197	< 1e-07	0.0003266	1.85698	TERT			NKX6-3
41	MSPI0406S00414851	< 1e-07	0.0001567	1.85469	BLK			NOL11
42	MSPI0406S00821660	< 1e-07	0.0004702	1.85437	NOL11			OTUB2
43	MSPI0406S00159043	< 1e-07	< 1e-07	1.84578	N/A			PHYHD1
44	MSPI0406S00070486	3.62e-05	0.0090129	1.81082	N/A			RASL11B
45	MSPI0406S00808748	2.8e-06	0.0012909	1.80497	N/A			RPL32P3
46	MSPI0406S00396921	1.49e-05	0.004325	1.78828	CALD1			SDF4
47	MSPI0406S00811872	2.3e-06	0.0011266	1.78037	ATAD4			SERINC5
48	MSPI0406S00773002	8.3e-06	0.0027104	1.73567	CDH13			SLAMF1
49	MSPI0406S00256782	< 1e-07	< 1e-07	1.73344	N/A			SMPD3
50	MSPI0406S00313248	9.4e-06	0.0029867	1.71237	HIST1H2BE			SNORA7B
51	MSPI0406S00774777	7.8e-06	0.002583	1.70935	FAM92B			SOST
52	MSPI0406S00785092	< 1e-07	< 1e-07	1.70552	N/A			ST6GALNAC3
53	MSPI0406S00152504	< 1e-07	9.04e-05	1.66961	WDR69			STX17
54	MSPI0406S00142666	4.5e-06	0.0017933	1.64537	COL5A2			TERT
55	MSPI0406S00000761	2.91e-05	0.0074369	1.62345	B3GALT6			TMEM64
55	MSPI0406S00000761	2.91e-05	0.0074369	1.62345	SDF4			TNF
56	MSPI0406S00806078	5.6e-06	0.0021237	1.61397	TNS4			TNS4
57	MSPI0406S00500001	< 1e-07	< 1e-07	1.53989	UCN3			TPP1
58	MSPI0406S00421319	< 1e-07	< 1e-07	1.51618	EXTL3			TTLL4
59	MSPI0406S00866366	2.09e-05	0.0055841	1.46789	N/A			TXNRD2
60	MSPI0406S00254042	< 1e-07	0.0003266	1.42623	CYP4V2			TYW3
61	MSPI0406S00425296	2.01e-05	0.0054952	1.41985	NKX6-3			UCK1
62	MSPI0406S00806077	4.2e-06	0.0017325	1.39552	TNS4			UCN3
63	MSPI0406S00196441	1.08e-05	0.0032857	1.38874	RPL32P3			WAPAL
63	MSPI0406S00196441	1.08e-05	0.0032857	1.38874	SNORA7B			WDR69
64	MSPI0406S00808564	6.3e-06	0.0022789	1.34405	SOST			ZNF512
65	MSPI0406S00578957	6.4e-06	0.00228	1.34133	GDPD5
66	MSPI0406S00691894	6.7e-06	0.0023166	1.29744	N/A
67	MSPI0406S00416270	7e-06	0.0023512	1.2703	MSR1
68	MSPI0406S00689173	9.9e-06	0.0030627	1.2633	OTUB2
69	MSPI0406S00271956	6.3e-06	0.0022789	1.26156	CENPH
70	MSPI0406S00435411	5e-06	0.0019593	1.25753	NECAB1
70	MSPI0406S00435411	5e-06	0.0019593	1.25753	TMEM64
71	MSPI0406S00489147	2.3e-06	0.0011266	1.25049	UCK1
72	MSPI0406S00149693	1.45e-05	0.0042615	1.24835	TTLL4
73	MSPI0406S00567912	< 1e-07	9.04e-05	1.20854	AHNAK
74	MSPI0406S00367898	3.66e-05	0.0090129	1.17529	N/A
75	MSPI0406S00640775	< 1e-07	0.0003266	1.14798	N/A
76	MSPI0406S00174169	3.85e-05	0.0092369	1.10656	N/A
77	MSPI0406S00553109	1.8e-06	0.0009842	1.10442	TPP1
78	MSPI0406S00107351	< 1e-07	0.0001567	1.07771	LHCGR
79	MSPI0406S00468383	1.77e-05	0.0050103	1.04939	MAK10
80	MSPI0406S00751664	< 1e-07	0.0003266	1.04823	N/A
81	MSPI0406S00043106	4.4e-06	0.0017837	1.01739	CRYZ
81	MSPI0406S00043106	4.4e-06	0.0017837	1.01739	TYW3
82	MSPI0406S00207746	3.17e-05	0.0080143	-1.27327	KLHL24
83	MSPI0406S00769390	6.8e-06	0.0023171	-1.60685	MLKL
84	MSPI0406S00616618	< 1e-07	0.0004331	-1.63149	CTDSP2
85	MSPI0406S00475081	1.09e-05	0.0032857	-1.70005	STX17
86	MSPI0406S00828175	1.85e-05	0.0051173	-1.85079	N/A
87	MSPI0406S00275442	2.43e-05	0.0062785	-1.86865	SERINC5
88	MSPI0406S00518038	2.27e-05	0.0059969	-1.88945	N/A
89	MSPI0406S00726380	2e-06	0.001045	-1.93688	ISG20
90	MSPI0406S00903784	< 1e-07	0.0003034	-1.95605	CLDND2
90	MSPI0406S00903784	< 1e-07	0.0003034	-1.95605	NKG7
91	MSPI0406S00054201	3.6e-06	0.0015675	-2.14122	MTMR11
92	MSPI0406S00902144	1.79e-05	0.0050103	-2.15694	MED25
93	MSPI0406S00564200	< 1e-07	0.0003813	-2.57739	FNBP4
94	MSPI0406S00902145	3.7e-06	0.0015817	-2.80207	MED25

## Sheet: E2A-PBX1 expression signature
Table S10.B. E2A-PBX1_expression_signature
Index	Probeset_ID	p-value	FDR	log2 fold change pos vs neg	GenBank Accession	Gene symbol	863 unique genes	Gene symbol
1	HSAP0406S00034101	< 1e-07	< 1e-07	6.42345	NM_080672	PHACTR3		2010-09-03
2	HSAP0406S00034102	< 1e-07	< 1e-07	6.19563	NM_183244	PHACTR3		12MelaCE5B3CD
3	HSAP0406S00002749	< 1e-07	< 1e-07	6.13927	M31522	N/A		4R-MAP2
4	HSAP0406S00002747	< 1e-07	< 1e-07	6.07017	NM_002585	PBX1		ABCA12
5	HSAP0406S00008174	< 1e-07	< 1e-07	5.52685	NM_130830	LRRC15		ABCD1
6	HSAP0406S00009617	< 1e-07	< 1e-07	5.40664	NM_005245	FAT		ABCE1
7	HSAP0406S00022871	< 1e-07	< 1e-07	5.28704	AY356353	N/A		ACBD4
8	HSAP0406S00004908	< 1e-07	< 1e-07	4.99946	L08961	N/A		ACCN1
9	HSAP0406S00004907	< 1e-07	< 1e-07	4.73854	NM_006343	MERTK		ACSL3
10	HSAP0406S00004909	< 1e-07	< 1e-07	4.5394	D16316	N/A		ACSL5
11	HSAP0406S00000122	< 1e-07	< 1e-07	4.41612	NM_002744	PRKCZ		ACTL7A
12	HSAP0406S00029814	< 1e-07	< 1e-07	4.35459	AL831834	DKFZp547N1914		ADAM21
13	HSAP0406S00035476	< 1e-07	< 1e-07	4.34364	AF131851	N/A		ADAMTS12
14	HSAP0406S00029815	< 1e-07	< 1e-07	4.32485	AL713655	DKFZp547M1113		AGPAT1
15	HSAP0406S00003170	< 1e-07	< 1e-07	4.30739	BC044226	MYBPH		ALD
16	HSAP0406S00009616	< 1e-07	< 1e-07	4.24927	D88798	ME5		ALDH1A1
17	HSAP0406S00008387	< 1e-07	< 1e-07	4.16488	NM_014392	D4S234E		AMBP
18	HSAP0406S00028184	4.7e-06	0.0004395	4.15851	BC009327	NXN		AMOT
19	HSAP0406S00029813	< 1e-07	< 1e-07	4.15582	NM_014405	CACNG4		ANKRD15
20	HSAP0406S00004911	< 1e-07	< 1e-07	4.11078	NM_153214	FLJ37440		ANKRD20A
21	HSAP0406S00014484	< 1e-07	< 1e-07	4.06585	NM_057168	WNT16		ANTXR2
22	HSAP0406S00014483	< 1e-07	< 1e-07	3.96047	NM_016087	WNT16		AOX1
23	HSAP0406S00011317	1.75e-05	0.0011535	3.95794	BC042019	NRN1		APBA1
24	HSAP0406S00035477	4.9e-06	0.0004514	3.93226	NM_015381	TAFA5		APOB
25	HSAP0406S00006069	< 1e-07	< 1e-07	3.92695	NM_005737	ARL7		AQP5
26	HSAP0406S00034631	8e-07	0.0001129	3.90297	NM_020528	PCBP3		AR
27	HSAP0406S00016747	1.2e-06	0.0001557	3.84519	NM_000689	ALDH1A1		ARGBP2
28	HSAP0406S00022875	< 1e-07	< 1e-07	3.82954	AY283057	N/A		ArgBP2b
29	HSAP0406S00010850	7e-07	0.0001032	3.81441	AB028952	KIAA1029		ARHGAP27
30	HSAP0406S00008398	1.51e-05	0.0010342	3.74098	BC007898	CRMP1		ARHGEF6
31	HSAP0406S00017980	< 1e-07	< 1e-07	3.7369	L36531	N/A		ARHT1
32	HSAP0406S00024305	0.0004902	0.0093626	3.71159	BC008857	NFATC4		ARL7
33	HSAP0406S00008399	1.64e-05	0.0011007	3.71151	NM_001313	CRMP1		ARRB1
34	HSAP0406S00023398	< 1e-07	< 1e-07	3.68931	BC043528	FLJ31978		ASRGL1
35	HSAP0406S00035445	< 1e-07	< 1e-07	3.60743	AK075566	N/A		ATP8B2
36	HSAP0406S00035444	< 1e-07	< 1e-07	3.53848	NM_006486	FBLN1		ATP-regulatedpotassiumchannel
37	HSAP0406S00033503	< 1e-07	< 1e-07	3.52599	U77914	N/A		BAIAP1
38	HSAP0406S00022214	< 1e-07	< 1e-07	3.52314	BC032946	AQP5		BAMBI
39	HSAP0406S00004912	< 1e-07	< 1e-07	3.47549	BC038242	N/A		BDNF
40	HSAP0406S00019935	< 1e-07	< 1e-07	3.43569	NM_174902	LOC143458		BMP10
41	HSAP0406S00018089	< 1e-07	< 1e-07	3.43498	NM_012342	BAMBI		BRDG1
42	HSAP0406S00016241	3e-07	5.05e-05	3.40773	BC020040	ANKRD15		BT3.3
43	HSAP0406S00009604	< 1e-07	< 1e-07	3.40156	AF049885	ArgBP2b		BTBD6
44	HSAP0406S00028944	< 1e-07	< 1e-07	3.39854	NM_183377	ACCN1		BTN3A2
45	HSAP0406S00016240	3e-07	5.05e-05	3.35157	NM_153186	ANKRD15		C13orf18
46	HSAP0406S00001406	1.2e-06	0.0001557	3.33694	NM_005012	ROR1		C14orf151
47	HSAP0406S00024493	< 1e-07	< 1e-07	3.33123	NM_007361	NID2		C14orf29
48	HSAP0406S00028186	8e-07	0.0001129	3.30795	NM_022463	NXN		C14orf37
49	HSAP0406S00035693	< 1e-07	< 1e-07	3.30408	NM_152780	FLJ14503		C17
50	HSAP0406S00021409	9.3e-06	0.0007276	3.29969	AF277292	N/A		C19orf2
51	HSAP0406S00023989	2.2e-06	0.0002517	3.29472	NM_004093	EFNB2		C1orf2
52	HSAP0406S00028183	6e-07	9.14e-05	3.29253	BC063828	NXN		C1orf26
53	HSAP0406S00028947	< 1e-07	< 1e-07	3.29062	NM_001094	ACCN1		C20orf59
54	HSAP0406S00002668	< 1e-07	< 1e-07	3.29045	BC067847	N/A		C20orf71
55	HSAP0406S00035691	< 1e-07	< 1e-07	3.28667	AK098768	N/A		C21orf106
56	HSAP0406S00006068	3e-07	5.05e-05	3.2817	BC001051	N/A		C21orf4
57	HSAP0406S00015683	< 1e-07	< 1e-07	3.27997	AF193756	N/A		C2orf16
58	HSAP0406S00015292	1e-07	1.93e-05	3.27869	S80632	TYP1		C2orf22
59	HSAP0406S00017981	< 1e-07	< 1e-07	3.22697	NM_003638	ITGA8		C5orf12
60	HSAP0406S00034630	2e-06	0.0002339	3.22171	AK094301	N/A		C6orf123
61	HSAP0406S00006976	2.4e-06	0.0002696	3.16348	X67055	N/A		C6orf134
62	HSAP0406S00030380	3.3e-06	0.0003359	3.14458	BC040542	KIAA0802		C6orf142
63	HSAP0406S00019934	< 1e-07	< 1e-07	3.13899	BC042754	LOC143458		C6orf62
64	HSAP0406S00035692	< 1e-07	< 1e-07	3.13098	BC037165	FLJ14503		C6orf80
65	HSAP0406S00030379	3.6e-06	0.0003595	3.12939	AB018345	KIAA0802		C7orf9
66	HSAP0406S00018083	< 1e-07	< 1e-07	3.12518	NM_173496	MPP7		C9orf59
67	HSAP0406S00028182	1.5e-06	0.000188	3.12139	AK027451	N/A		CACNA1B
68	HSAP0406S00019229	< 1e-07	< 1e-07	3.10036	NM_174937	TCERG1L		CACNG4
69	HSAP0406S00037211	0.0001343	0.0045275	3.07106	AK125190	N/A		CALCA
70	HSAP0406S00025502	0.0002173	0.0059914	3.0557	BC067106	GPR		CALD1
71	HSAP0406S00021412	1.91e-05	0.0012197	3.04771	AK075396	N/A		CAMKK2
72	HSAP0406S00013138	0.0001799	0.0054187	3.0477	AK125190	N/A		CAPN13
73	HSAP0406S00005618	4.7e-06	0.0004395	3.02958	NM_001159	AOX1		CBWD2
74	HSAP0406S00011443	1e-07	1.93e-05	3.02506	NM_000948	PRL		CBX6
75	HSAP0406S00004754	< 1e-07	< 1e-07	2.97684	NM_017789	SEMA4C		CCL11
76	HSAP0406S00003872	< 1e-07	< 1e-07	2.97455	NM_002236	KCNF1		CCND2
77	HSAP0406S00006975	3.6e-06	0.0003595	2.97002	NM_002217	ITIH3		CCNT2
78	HSAP0406S00010852	< 1e-07	< 1e-07	2.93376	AK091066	N/A		CD164
79	HSAP0406S00004752	< 1e-07	< 1e-07	2.90105	BC017476	SEMA4C		CD34
80	HSAP0406S00004753	< 1e-07	< 1e-07	2.90015	AB051526	KIAA1739		CD99
81	HSAP0406S00024482	0.0002088	0.0058329	2.88533	BC034603	C14orf29		CDKN2D
82	HSAP0406S00004748	< 1e-07	< 1e-07	2.86663	AF258577	N/A		CDO1
83	HSAP0406S00019144	1.6e-06	0.0001933	2.84263	AL713712	DKFZp564B0278		CDRT1
84	HSAP0406S00014975	7.57e-05	0.0031341	2.83837	NM_033225	CSMD1		CDX4
85	HSAP0406S00009195	2e-07	3.54e-05	2.83814	NM_003360	UGT8		CEACAM7
86	HSAP0406S00014614	1e-07	1.93e-05	2.82825	NM_033139	CALD1		CGI-119
87	HSAP0406S00004749	< 1e-07	< 1e-07	2.79927	AF370374	N/A		CGI-12
88	HSAP0406S00004750	< 1e-07	< 1e-07	2.79567	AK000376	N/A		CHGB
89	HSAP0406S00019145	1.5e-06	0.000188	2.78849	BC000999	N/A		CHR14SYT
90	HSAP0406S00017181	< 1e-07	< 1e-07	2.788	NM_138424	KIF12		CHRM2
91	HSAP0406S00008720	< 1e-07	< 1e-07	2.77693	AK126014	N/A		CHRNA7
92	HSAP0406S00029552	5.14e-05	0.0024438	2.75791	J00112	COL1A1		CHRNB1
93	HSAP0406S00017182	0.0003193	0.0075126	2.74696	NM_032888	COL27A1		CHST6
94	HSAP0406S00026443	6.3e-06	0.0005501	2.7429	NM_020211	RGMA		CKLF
95	HSAP0406S00008623	0.0005167	0.0096546	2.74061	U62325	hFE65L		CLCN7
96	HSAP0406S00029550	1.21e-05	0.0008708	2.73111	S64596	COL1A1		CLN2
97	HSAP0406S00021410	9.6e-06	0.0007416	2.72835	AY189281	N/A		CMA1
98	HSAP0406S00008723	< 1e-07	< 1e-07	2.72193	AL137336	DKFZp434B239		CNTNAP2
99	HSAP0406S00004751	< 1e-07	< 1e-07	2.72177	BC062984	N/A		COBL
100	HSAP0406S00014615	< 1e-07	< 1e-07	2.71754	BX538339	DKFZp686P03208		COL1A1
101	HSAP0406S00023397	5.6e-05	0.0025825	2.71248	AK125272	N/A		COL27A1
102	HSAP0406S00034139	< 1e-07	< 1e-07	2.70776	NM_005560	LAMA5		COL2A1
103	HSAP0406S00026441	5.7e-06	0.0005073	2.69913	BC015886	RGMA		CPA6
104	HSAP0406S00026442	6.4e-06	0.0005562	2.68999	AL390083	N/A		CPN2
105	HSAP0406S00003885	0.0002914	0.0071179	2.67971	NM_021643	TRIB2		CPXM2
106	HSAP0406S00034136	< 1e-07	< 1e-07	2.67337	BC003355	LAMA5		creb-rp
107	HSAP0406S00005106	3e-06	0.0003123	2.66725	AB005217	N/A		CRMP1
108	HSAP0406S00009415	< 1e-07	< 1e-07	2.66075	AK000054	N/A		CRYM
109	HSAP0406S00015290	2e-07	3.54e-05	2.64624	NM_057158	DUSP4		CRYZL1
110	HSAP0406S00009417	< 1e-07	< 1e-07	2.64456	NM_017639	DCHS2		CSF2RB
111	HSAP0406S00003824	1.1e-06	0.0001448	2.63626	NM_001001695	FLJ42418		CSMD1
112	HSAP0406S00030378	< 1e-07	< 1e-07	2.63103	NM_015210	KIAA0802		CSRP3
113	HSAP0406S00027053	< 1e-07	< 1e-07	2.61021	BC018061	CRYM		CST8
114	HSAP0406S00029551	5.59e-05	0.0025825	2.6097	J00111	COL1A1		CTBS
115	HSAP0406S00009377	1e-06	0.0001345	2.60707	AL834498	DKFZp761I032		CTDSP1
116	HSAP0406S00003821	5e-07	8.05e-05	2.59985	NM_003108	SOX11		CTDSP2
117	HSAP0406S00013501	< 1e-07	< 1e-07	2.59923	NM_175887	LOC222171		CX36
118	HSAP0406S00025729	< 1e-07	< 1e-07	2.59868	AB040912	KIAA1479		CXorf45
119	HSAP0406S00009603	< 1e-07	< 1e-07	2.59735	NM_021069	ARGBP2		CYFIP1
120	HSAP0406S00010849	< 1e-07	< 1e-07	2.58	AL831818	DKFZp451G172		CYP2R1
121	HSAP0406S00014613	2e-07	3.54e-05	2.57458	NM_033138	CALD1		CYSLTR1
122	HSAP0406S00024310	6.66e-05	0.0028837	2.56667	BC008219	KIAA1305		D4S234E
123	HSAP0406S00013749	0.0001187	0.0042015	2.55508	AL713786	DKFZp547K059		DAB1
124	HSAP0406S00018747	< 1e-07	< 1e-07	2.5544	U70668	N/A		DBC1
125	HSAP0406S00024307	2.92e-05	0.0016838	2.52926	AB037726	KIAA1305		DBCCR1L
126	HSAP0406S00035148	< 1e-07	< 1e-07	2.51958	NM_002854	PVALB		DCHS2
127	HSAP0406S00026598	< 1e-07	< 1e-07	2.51277	NM_016541	GNG13		DEFB104
128	HSAP0406S00011248	0.0004283	0.0087047	2.51236	U52682	IRF4		DENR
129	HSAP0406S00008173	< 1e-07	< 1e-07	2.47879	BC042334	N/A		D-GPCR
130	HSAP0406S00008171	< 1e-07	< 1e-07	2.47582	J05158	CPN2		DKFZP434B0335
131	HSAP0406S00009416	< 1e-07	< 1e-07	2.47297	AK123368	N/A		DKFZp434B1222
132	HSAP0406S00025730	< 1e-07	< 1e-07	2.47285	NM_153618	SEMA6D		DKFZp434B1272
133	HSAP0406S00013750	0.0002695	0.0068532	2.44321	BC029275	COBL		DKFZp434B239
134	HSAP0406S00021411	2.5e-06	0.000275	2.44259	AK127359	N/A		DKFZp434D2328
135	HSAP0406S00020748	4.49e-05	0.0022418	2.43477	NM_002599	PDE2A		DKFZp434E0130
136	HSAP0406S00016762	< 1e-07	< 1e-07	2.41679	NM_006200	PCSK5		DKFZp434E1512
137	HSAP0406S00015474	< 1e-07	< 1e-07	2.41043	AB067476	KIAA1889		DKFZp434F0326
138	HSAP0406S00015291	9e-07	0.0001247	2.40324	NM_001394	DUSP4		DKFZp434F117
139	HSAP0406S00001944	< 1e-07	< 1e-07	2.37787	AB007935	KIAA0466		DKFZP434H132
140	HSAP0406S00011247	6.97e-05	0.0029622	2.35367	D78261	N/A		DKFZp434H2410
141	HSAP0406S00008172	< 1e-07	< 1e-07	2.35339	BC031569	N/A		DKFZp434I2330
142	HSAP0406S00010851	4.03e-05	0.0021026	2.34694	NM_007286	SYNPO		DKFZp434K1526
143	HSAP0406S00006071	2e-07	3.54e-05	2.34103	AF015043	N/A		DKFZP434L1717
144	HSAP0406S00028194	2.71e-05	0.0015825	2.34088	NM_033375	MYO1C		DKFZp434L187
145	HSAP0406S00019931	7.9e-05	0.0032272	2.33446	NM_014344	FJX1		DKFZp434O0710
146	HSAP0406S00019142	< 1e-07	< 1e-07	2.32959	NM_206862	TACC2		DKFZp434P0111
147	HSAP0406S00028591	< 1e-07	< 1e-07	2.32843	NM_006470	TRIM16		DKFZp451A177
148	HSAP0406S00033898	< 1e-07	< 1e-07	2.32218	NM_002999	SDC4		DKFZp451C216
149	HSAP0406S00024857	1e-07	1.93e-05	2.32157	AL157492	DKFZp434P0111		DKFZp451E204
150	HSAP0406S00007061	< 1e-07	< 1e-07	2.31684	AY358677	N/A		DKFZp451F203
151	HSAP0406S00037163	5.14e-05	0.0024438	2.31346	AY206416	N/A		DKFZp451G172
152	HSAP0406S00016719	1.08e-05	0.0008056	2.31324	NM_001163	APBA1		DKFZp451G223
153	HSAP0406S00000321	1.96e-05	0.001243	2.29322	NM_198545	LOC374946		DKFZp451G231
154	HSAP0406S00025767	0.0003874	0.0082895	2.29032	NM_003645	SLC27A2		DKFZp451K069
155	HSAP0406S00028195	3.75e-05	0.0020084	2.28955	BC044891	MYO1C		DKFZp451K071
156	HSAP0406S00031047	1e-07	1.93e-05	2.28953	NM_173480	LOC126295		DKFZp547C1010
157	HSAP0406S00036095	1e-07	1.93e-05	2.28526	M73069	AR		DKFZp547D2210
158	HSAP0406S00023417	4.3e-06	0.0004094	2.28391	AL162032	DKFZp434B1272		DKFZp547J236
159	HSAP0406S00037162	2e-07	3.54e-05	2.28379	NM_005018	PDCD1		DKFZp547K059
160	HSAP0406S00022576	0.000275	0.0069381	2.27492	NM_178502	DTX3		DKFZp547K159
161	HSAP0406S00020889	0.0001311	0.0044638	2.26799	AB037723	KIAA1302		DKFZp547M1113
162	HSAP0406S00020890	0.0001171	0.0041769	2.26018	BX640737	DKFZp686K11107		DKFZp547N1914
163	HSAP0406S00020021	3e-07	5.05e-05	2.25857	AB011540	MEGF7		DKFZp564A126
164	HSAP0406S00009418	< 1e-07	< 1e-07	2.25175	NM_199348	DCHS2		DKFZp564B0278
165	HSAP0406S00006407	< 1e-07	< 1e-07	2.24892	NM_024697	FLJ22419		DKFZP564D172
166	HSAP0406S00003486	6e-07	9.14e-05	2.22363	BC006365	PSEN2		DKFZp564O0423
167	HSAP0406S00036094	< 1e-07	< 1e-07	2.20265	NM_000044	AR		DKFZp564O1863
168	HSAP0406S00018751	2e-07	3.54e-05	2.20115	NM_015385	SORBS1		DKFZp586A0522
169	HSAP0406S00020888	1.83e-05	0.0011892	2.18113	BX537983	DKFZp686D0412		DKFZp586E041
170	HSAP0406S00028760	< 1e-07	< 1e-07	2.17898	AF005214	N/A		DKFZp586G0322
171	HSAP0406S00018749	1e-06	0.0001345	2.17538	BX640814	DKFZp686N08224		DKFZp586H1322
172	HSAP0406S00028859	9e-07	0.0001247	2.17531	NM_198147	LOC116236		DKFZp667B0210
173	HSAP0406S00029549	0.0001841	0.0054706	2.17093	J00113	COL1A1		DKFZp686B2046
174	HSAP0406S00020886	0.000199	0.005693	2.15829	AL080120	DKFZp564O0423		DKFZp686D0412
175	HSAP0406S00023517	1.1e-06	0.0001448	2.1393	NM_002010	FGF9		DKFZp686D0452
176	HSAP0406S00006070	1.4e-06	0.0001779	2.13839	NM_014521	SH3BP4		DKFZp686E10210
177	HSAP0406S00017183	0.0001943	0.0056105	2.11686	AB058773	KIAA1870		DKFZp686E11248
178	HSAP0406S00005105	1.8e-05	0.0011739	2.11613	AK124659	N/A		DKFZp686E1669
179	HSAP0406S00009376	1.08e-05	0.0008056	2.09272	NM_152619	MGC45428		DKFZp686H05229
180	HSAP0406S00011089	< 1e-07	< 1e-07	2.09035	AY037146	N/A		DKFZp686I22213
181	HSAP0406S00020887	4.04e-05	0.0021026	2.07982	AK056531	N/A		DKFZp686K11107
182	HSAP0406S00003775	1.89e-05	0.0012133	2.07754	NM_001001964	OR2T11		DKFZp686M02159
183	HSAP0406S00023792	< 1e-07	< 1e-07	2.07712	BC051771	FLJ30707		DKFZp686N08224
184	HSAP0406S00011090	< 1e-07	< 1e-07	2.07305	AK024427	FLJ00016		DKFZp686N23150
185	HSAP0406S00003353	3.6e-06	0.0003595	2.0443	NM_024749	FLJ12505		DKFZp686P03208
186	HSAP0406S00008722	1e-07	1.93e-05	2.03665	AL133028	DKFZp434F117		DKFZp761I032
187	HSAP0406S00021533	< 1e-07	< 1e-07	2.03473	NM_052875	MGC10485		DKFZp761K1115
188	HSAP0406S00021538	4.7e-06	0.0004395	2.03453	AK123661	N/A		DKFZp761K1218
189	HSAP0406S00018026	6.9e-05	0.0029426	2.03126	NM_012443	SPAG6		DKFZp761L03121
190	HSAP0406S00018752	7e-07	0.0001032	2.02396	AB037717	KIAA1296		DKFZp761L24121
191	HSAP0406S00003777	5.4e-06	0.0004889	2.0224	NM_001001824	OR2T27		DKFZp761M1613
192	HSAP0406S00025255	7.2e-06	0.0006057	2.02235	NM_002226	JAG2		DKFZp762B226
193	HSAP0406S00003354	1.06e-05	0.0007939	2.00893	AK022567	N/A		DKFZp762K137
194	HSAP0406S00019143	< 1e-07	< 1e-07	1.98644	NM_006997	TACC2		DKFZp762L0911
195	HSAP0406S00016011	1e-07	1.93e-05	1.98644	AK128212	N/A		DKFZp762M1316
196	HSAP0406S00034054	< 1e-07	< 1e-07	1.97959	NM_003222	TFAP2C		DKFZp762N186
197	HSAP0406S00032815	1.4e-06	0.0001779	1.96623	NM_152899	IL4I1		DKFZp781K2028
198	HSAP0406S00030520	2e-07	3.54e-05	1.96322	NM_198991	KCTD1		DLEU2
199	HSAP0406S00019166	1e-07	1.93e-05	1.95689	NM_198148	CPXM2		DMRT3
200	HSAP0406S00035988	0.0004287	0.008708	1.95399	NM_133431	GAGED2		DNMT3B
201	HSAP0406S00001360	< 1e-07	< 1e-07	1.94066	AF263547	DAB1		DOCK8
202	HSAP0406S00023401	3e-06	0.0003123	1.93892	AB075824	KIAA1944		DOK4
203	HSAP0406S00007467	1e-06	0.0001345	1.93735	AB033063	KIAA1237		DPCR1
204	HSAP0406S00024304	2.71e-05	0.0015825	1.93622	NM_004554	NFATC4		DPT
205	HSAP0406S00033512	4.22e-05	0.0021558	1.92498	AK074473	N/A		DRIP92
206	HSAP0406S00007465	4.14e-05	0.0021365	1.92085	BC004539	HEG		DTX3
207	HSAP0406S00028444	4.1e-06	0.0003924	1.91487	NM_000747	CHRNB1		DUSP3
208	HSAP0406S00007062	4.3e-06	0.0004094	1.91477	AK124920	N/A		DUSP4
209	HSAP0406S00035985	0.0003737	0.0081094	1.90689	NM_133431	GAGED2		E2F2
210	HSAP0406S00020892	< 1e-07	< 1e-07	1.88567	BC008359	N/A		EB-1
211	HSAP0406S00020296	0.0001923	0.0055925	1.87187	AK025969	N/A		EFNB1
212	HSAP0406S00016239	< 1e-07	< 1e-07	1.86927	AL832454	DKFZp451G231		EFNB2
213	HSAP0406S00035992	0.0004609	0.0090478	1.86535	NM_133431	GAGED2		EGFL3
214	HSAP0406S00033511	5.64e-05	0.0025945	1.86078	BC017997	N/A		EGFL7
215	HSAP0406S00008396	9.48e-05	0.003616	1.85479	NM_147127	EVC2		EPB41L2
216	HSAP0406S00023402	2.7e-06	0.0002926	1.8531	NM_133448	KIAA1944		EPHA3
217	HSAP0406S00011087	1e-07	1.93e-05	1.8524	NM_001001502	SNCB		EPHB4
218	HSAP0406S00032410	0.0003208	0.0075146	1.85188	S59494	PSG1		EREG1
219	HSAP0406S00021629	< 1e-07	< 1e-07	1.85092	NM_000217	KCNA1		ETNK2
220	HSAP0406S00032818	6.2e-06	0.0005439	1.84673	NM_172374	IL4I1		ETV6
221	HSAP0406S00007463	1.6e-06	0.0001933	1.84586	AF173887	MST112		EVC2
222	HSAP0406S00020244	1.3e-06	0.0001669	1.84319	AY205235	N/A		EVER1
223	HSAP0406S00003770	5.6e-06	0.0005008	1.83478	NM_001005495	OR2T3		EVER2
224	HSAP0406S00003773	4e-06	0.0003858	1.82851	NM_001001821	OR2T34		EVI2A
225	HSAP0406S00009810	< 1e-07	< 1e-07	1.82026	AJ250725	ADAMTS12		EXTL3
226	HSAP0406S00016749	< 1e-07	< 1e-07	1.81965	NM_006914	RORB		F8
227	HSAP0406S00016332	1e-07	1.93e-05	1.81954	AK000050	N/A		FABP1
228	HSAP0406S00001943	< 1e-07	< 1e-07	1.80956	NM_001542	IGSF3		factorV
229	HSAP0406S00023309	1.5e-06	0.000188	1.80442	NM_003959	HIP1R		FAD104
230	HSAP0406S00032817	3.5e-06	0.0003533	1.80358	BC064378	IL4I1		FAM38A
231	HSAP0406S00032411	0.0003625	0.0080245	1.79618	M30628	SP1		FAT
232	HSAP0406S00037210	4e-07	6.61e-05	1.79558	NM_014356	C6orf123		FBLN1
233	HSAP0406S00001948	0.0002079	0.0058194	1.79367	AB014734	smap-6		FBP1
234	HSAP0406S00021604	4.23e-05	0.0021558	1.78965	AK024470	FLJ00063		FBX23
235	HSAP0406S00025732	< 1e-07	< 1e-07	1.78931	AK022831	N/A		FBXO40
236	HSAP0406S00015327	< 1e-07	< 1e-07	1.78775	AY358147	N/A		FBXO9
237	HSAP0406S00033687	0.0002174	0.0059914	1.78384	NM_003098	SNTA1		FBXW10
238	HSAP0406S00023399	6e-06	0.0005289	1.77913	AK094656	N/A		FELS
239	HSAP0406S00023400	2.3e-06	0.0002616	1.7744	AL833234	DKFZp761K1218		FGF9
240	HSAP0406S00007464	1e-06	0.0001345	1.77353	AK074987	N/A		FGFBP1
241	HSAP0406S00008888	0.0005438	0.0099937	1.77159	AK027744	N/A		FGFRL1
242	HSAP0406S00027901	< 1e-07	< 1e-07	1.76793	NM_021615	CHST6		FHL1
243	HSAP0406S00023308	1.7e-06	0.000204	1.76639	AB014555	KIAA0655		FHOD3
244	HSAP0406S00008443	5.77e-05	0.0026345	1.76593	BC067214	N/A		FIBL-6
245	HSAP0406S00003167	4e-07	6.61e-05	1.76573	AK126624	N/A		FIGN
246	HSAP0406S00013284	< 1e-07	< 1e-07	1.75795	AL136731	DKFZp434H2410		FJX1
247	HSAP0406S00006481	< 1e-07	< 1e-07	1.74924	NM_003149	STAC		FKBP5
248	HSAP0406S00003749	8.6e-06	0.0006919	1.74768	NM_001005522	OR2T8		FLG
249	HSAP0406S00014299	1.02e-05	0.0007749	1.74579	AL831911	DKFZp547K159		FLJ00009
250	HSAP0406S00020246	5e-07	8.05e-05	1.74461	BC042143	N/A		FLJ00010
251	HSAP0406S00035997	0.0001071	0.0039111	1.74265	BT007099	N/A		FLJ00016
252	HSAP0406S00023416	< 1e-07	< 1e-07	1.73875	AK127893	N/A		FLJ00024
253	HSAP0406S00000606	0.0001508	0.0049118	1.73523	NM_004091	E2F2		FLJ00039
254	HSAP0406S00015985	2.6e-05	0.0015328	1.72495	AF248241	N/A		FLJ00041
255	HSAP0406S00022872	< 1e-07	< 1e-07	1.72413	BC026313	EB-1		FLJ00059
256	HSAP0406S00014300	8.7e-06	0.0006984	1.72382	NM_198571	FLJ39237		FLJ00063
257	HSAP0406S00000605	0.0001024	0.0038036	1.71724	BC007609	E2F2		FLJ00094
258	HSAP0406S00003772	1.94e-05	0.0012346	1.71587	NM_001004694	OR2T29		FLJ00100
259	HSAP0406S00023463	4.89e-05	0.0023739	1.71549	AF128541	POLE1		FLJ00125
260	HSAP0406S00003757	3.64e-05	0.0019691	1.71478	NM_001004690	OR2M5		FLJ00178
261	HSAP0406S00032415	0.0003147	0.0074594	1.71428	NM_006905	PSG1		FLJ00221
262	HSAP0406S00020245	2.5e-06	0.000275	1.71394	NM_152718	FLJ32009		FLJ00332
263	HSAP0406S00015562	< 1e-07	< 1e-07	1.71219	NM_020361	CPA6		FLJ00336
264	HSAP0406S00035987	0.0001394	0.004661	1.70957	BT007099	N/A		FLJ00346
265	HSAP0406S00022877	< 1e-07	< 1e-07	1.7062	AF145204	EB-1		FLJ00412
266	HSAP0406S00002268	0.0003975	0.0084026	1.69823	M24355	FLG		FLJ10652
267	HSAP0406S00019972	7.71e-05	0.0031707	1.69364	BC003010	N/A		FLJ10901
268	HSAP0406S00002897	2.1e-06	0.0002426	1.69342	NM_020318	PAPPA2		FLJ10916
269	HSAP0406S00007171	< 1e-07	< 1e-07	1.6934	NM_005233	EPHA3		FLJ12505
270	HSAP0406S00033917	0.0001896	0.0055446	1.69172	NM_172006	WFDC10B		FLJ12681
271	HSAP0406S00008237	0.0001555	0.0049824	1.68991	NM_005929	MFI2		FLJ12788
272	HSAP0406S00017179	< 1e-07	< 1e-07	1.6828	M11562	ITIL		FLJ14503
273	HSAP0406S00020161	0.0001361	0.0045714	1.68175	NM_001004459	OR1S2		FLJ14525
274	HSAP0406S00013041	3.65e-05	0.0019691	1.67604	AB002346	KIAA0348		FLJ14753
275	HSAP0406S00020298	1e-06	0.0001345	1.67453	BC006267	ASRGL1		FLJ16353
276	HSAP0406S00032186	5.52e-05	0.0025649	1.67446	NM_033256	PPP1R14A		FLJ20232
277	HSAP0406S00003776	1.64e-05	0.0011007	1.67314	NM_001001827	OR2T35		FLJ20272
278	HSAP0406S00022637	< 1e-07	< 1e-07	1.67009	BC039369	N/A		FLJ20477
279	HSAP0406S00021600	0.0001053	0.0038761	1.66867	X94438	TEF-3		FLJ21918
280	HSAP0406S00036406	0.0001923	0.0055925	1.66642	NM_133265	AMOT		FLJ22313
281	HSAP0406S00020294	1.59e-05	0.001075	1.665	BC021295	ASRGL1		FLJ22419
282	HSAP0406S00011470	0.0003939	0.0083724	1.66493	NM_170745	HIST1H2AA		FLJ23235
283	HSAP0406S00013361	4e-07	6.61e-05	1.66262	NM_002947	RPA3		FLJ25102
284	HSAP0406S00006739	0.0002771	0.00696	1.66225	AB007867	KIAA0407		FLJ25811
285	HSAP0406S00036164	0.000181	0.005421	1.65884	NM_005193	CDX4		FLJ30435
286	HSAP0406S00000131	< 1e-07	< 1e-07	1.65818	AK127994	N/A		FLJ30707
287	HSAP0406S00004892	0.0003895	0.0083146	1.65787	AK095678	N/A		FLJ31810
288	HSAP0406S00034611	4.15e-05	0.0021387	1.65639	AY082339	N/A		FLJ31978
289	HSAP0406S00003763	8.3e-06	0.0006707	1.65604	NM_001004692	OR2T12		FLJ32009
290	HSAP0406S00019973	0.0003658	0.0080358	1.65383	AK096176	N/A		FLJ32332
291	HSAP0406S00033493	1.5e-06	0.000188	1.65103	L41349	PLCB4		FLJ34389
292	HSAP0406S00003476	6e-07	9.14e-05	1.64961	AY166858	N/A		FLJ34870
293	HSAP0406S00036303	1.6e-06	0.0001933	1.64816	NM_021992	TMSNB		FLJ36268
294	HSAP0406S00001942	< 1e-07	< 1e-07	1.64568	AK097809	N/A		FLJ37440
295	HSAP0406S00003778	2.17e-05	0.0013393	1.64379	NM_001004734	OR5BU1		FLJ37562
296	HSAP0406S00030658	0.0002152	0.0059575	1.64377	AK025336	N/A		FLJ37794
297	HSAP0406S00035993	6.2e-05	0.0027458	1.63706	BT007099	N/A		FLJ38482
298	HSAP0406S00035994	0.0002611	0.0067467	1.63655	BT007099	N/A		FLJ38993
299	HSAP0406S00030347	< 1e-07	< 1e-07	1.63112	AF185573	N/A		FLJ39237
300	HSAP0406S00003762	2.25e-05	0.0013703	1.63112	NM_001004695	OR2T33		FLJ40121
301	HSAP0406S00007063	1.37e-05	0.0009561	1.62874	NM_198463	FLJ42117		FLJ42117
302	HSAP0406S00024100	0.0002695	0.0068532	1.62624	NM_001005500	OR4M1		FLJ42418
303	HSAP0406S00027024	4.4e-05	0.0022148	1.62395	AY255545	N/A		FLJ43965
304	HSAP0406S00003741	3.8e-06	0.0003714	1.61989	X89674	tpcr27		FLJ44216
305	HSAP0406S00007963	3.75e-05	0.0020084	1.61531	AY358146	N/A		FLJ45202
306	HSAP0406S00007455	0.0001617	0.0050826	1.60857	AL133624	DKFZp434B1222		FLJ45686
307	HSAP0406S00025357	0.0005009	0.0094795	1.60791	NM_001004719	OR4M2		FLJ90024
308	HSAP0406S00035986	0.0001058	0.003879	1.60599	BT007099	N/A		FLJ90119
309	HSAP0406S00003487	4e-07	6.61e-05	1.60567	AK123980	N/A		FLNB
310	HSAP0406S00003771	3e-07	5.05e-05	1.60538	NM_001004697	OR2T5		FLT3
311	HSAP0406S00035970	0.0001874	0.0055153	1.60214	NM_018159	NUDT11		FLT4
312	HSAP0406S00028860	0.0002373	0.0063223	1.59982	BC012476	LOC116236		FNBP1
313	HSAP0406S00023793	< 1e-07	< 1e-07	1.59945	AY358177	N/A		FOXR2
314	HSAP0406S00003608	< 1e-07	< 1e-07	1.59913	BC037878	SLC35F3		FP2747
315	HSAP0406S00036487	0.0001094	0.0039793	1.59779	NM_173571	LOC255313		FSCN1
316	HSAP0406S00004886	0.0003036	0.0073164	1.59475	AK095678	N/A		FSTL3
317	HSAP0406S00028762	0.0002559	0.0066548	1.59433	BC019938	LOC339263		FUT7
318	HSAP0406S00013137	3e-07	5.05e-05	1.592	NM_014356	C6orf123		GAB1
319	HSAP0406S00035151	0.0001322	0.0044854	1.58035	NM_000395	CSF2RB		GAB3
320	HSAP0406S00023325	0.0003179	0.0074942	1.58007	AK023831	N/A		GABRB2
321	HSAP0406S00030729	3.15e-05	0.0017802	1.57931	NM_005912	MC4R		GABRE
322	HSAP0406S00003769	3.65e-05	0.0019691	1.57844	NM_001004136	OR2T2		GAGED2
323	HSAP0406S00025438	0.0004448	0.0088748	1.57614	BC037571	CHRNA7		GALNT1
324	HSAP0406S00020295	0.0001328	0.0044926	1.57539	NM_025080	ASRGL1		GALNT6
325	HSAP0406S00003805	0.0004827	0.0092829	1.57481	AF036943	MYT1-l		GARNL4
326	HSAP0406S00006149	0.0002581	0.0066879	1.57453	U37194	N/A		GCN5L2
327	HSAP0406S00002752	< 1e-07	< 1e-07	1.57417	NM_177398	LMX1A		GHRHR
328	HSAP0406S00019771	6.73e-05	0.0029013	1.57273	NM_054032	MRGX4		GHRH-R
329	HSAP0406S00002754	1.6e-06	0.0001933	1.571	NM_001005214	FLJ25811		GliPR
330	HSAP0406S00001405	8e-07	0.0001129	1.56908	BC006374	N/A		GLIPR1
331	HSAP0406S00003031	2.7e-06	0.0002926	1.56871	U67037	N/A		GLRA1
332	HSAP0406S00036415	2.66e-05	0.0015582	1.56846	BC056898	PLS3		GNAQ
333	HSAP0406S00003756	7.2e-06	0.0006057	1.56546	AF308814	JCG10		GNG13
334	HSAP0406S00016331	1e-07	1.93e-05	1.56519	AK025882	N/A		GPAA1
335	HSAP0406S00013040	9.6e-05	0.0036392	1.56087	NM_003898	SYNJ2		GPR
336	HSAP0406S00019796	4.2e-05	0.0021554	1.55709	BC017073	FLJ90119		GPR133
337	HSAP0406S00007964	4.85e-05	0.0023607	1.54465	AK075220	N/A		GPR139
338	HSAP0406S00009409	2.63e-05	0.0015431	1.54359	BC021232	N/A		GPR158
339	HSAP0406S00021601	2.12e-05	0.0013195	1.54154	BC015497	N/A		GPR158L1
340	HSAP0406S00020297	3.55e-05	0.0019379	1.53767	BC064963	ASRGL1		GPR39
341	HSAP0406S00035401	< 1e-07	< 1e-07	1.53665	NM_176874	SULT4A1		GPR52
342	HSAP0406S00003774	2.8e-06	0.0002965	1.53659	NM_001004693	OR2T10		GRIA1
343	HSAP0406S00036533	0.0001318	0.0044794	1.53626	AL137369	DKFZp434F0326		GRM8
344	HSAP0406S00022112	1.2e-05	0.000867	1.53568	NM_000376	VDR		GRP
345	HSAP0406S00003767	8.9e-06	0.0007114	1.53508	NM_001005471	OR2T6		Gup1
346	HSAP0406S00003750	8.3e-06	0.0006707	1.53392	NM_001001963	OR2L8		HA-1
347	HSAP0406S00003765	9.2e-06	0.0007228	1.53343	NM_001001918	OR5BF1		HAND2
348	HSAP0406S00003768	1.49e-05	0.0010262	1.53107	NM_030904	OR2T1		HDAC4
349	HSAP0406S00016477	0.0004678	0.0091249	1.5277	NM_002771	PRSS3		HEG
350	HSAP0406S00033189	0.000338	0.0077349	1.52759	BC052616	N/A		HEYL
351	HSAP0406S00002728	0.0005348	0.0098875	1.52746	BC047472	N/A		hFE65L
352	HSAP0406S00003759	3.11e-05	0.0017684	1.52479	NM_001004689	OR2M3		HHEX
353	HSAP0406S00019609	4.71e-05	0.002314	1.5244	NM_003696	OR6A2		HIMAP2
354	HSAP0406S00022582	0.0002495	0.0065667	1.52044	AF331523	N/A		HIP1R
355	HSAP0406S00003680	3.1e-06	0.00032	1.52031	AK124614	N/A		HIST1H2AA
356	HSAP0406S00003571	0.0003288	0.0076197	1.51839	BC066649	FLJ14525		HIST1H4H
357	HSAP0406S00001709	7.2e-05	0.0030251	1.51567	AB015616	12MelaCE5B3CD		HNRPDL
358	HSAP0406S00017823	7.7e-06	0.0006333	1.51554	NM_000718	CACNA1B		HPCAL1
359	HSAP0406S00019971	0.0002568	0.0066636	1.51524	AF010315	PIG11		HPRT1
360	HSAP0406S00006416	7.2e-06	0.0006057	1.51339	M62303	RARB		HSD3B2
361	HSAP0406S00011643	0.000238	0.0063299	1.50912	BC016866	TRIM31		HSH2D
362	HSAP0406S00024553	3.7e-06	0.0003665	1.50863	NM_001001872	C14orf37		HSPG2
363	HSAP0406S00001025	2.1e-06	0.0002426	1.50648	NM_014571	HEYL		HT017
364	HSAP0406S00032034	< 1e-07	< 1e-07	1.50299	AF452715	N/A		HTR3A
365	HSAP0406S00023785	3.7e-05	0.0019903	1.50243	BC055417	DLEU2		HXMA
366	HSAP0406S00003732	5e-07	8.05e-05	1.49935	NM_001004698	OR2W5		HZGJ
367	HSAP0406S00006738	0.0004656	0.0090965	1.49557	BC066773	PLXNB1		ICEBERG
368	HSAP0406S00013496	< 1e-07	< 1e-07	1.49345	AB014544	KIAA0644		IFI44
369	HSAP0406S00032589	0.0001952	0.0056133	1.49309	AK125754	N/A		IGSF3
370	HSAP0406S00017819	< 1e-07	< 1e-07	1.49254	AK097611	N/A		IL12RB1
371	HSAP0406S00019509	0.0003498	0.0078688	1.49229	NM_001004758	OR51S1		IL19
372	HSAP0406S00025363	0.0004519	0.008967	1.4917	NM_014608	CYFIP1		IL1F6
373	HSAP0406S00033672	0.0002024	0.005744	1.49154	NM_006892	DNMT3B		IL1RAPL1
374	HSAP0406S00015004	0.0001187	0.0042015	1.48974	NM_016512	SPAG11		IL4I1
375	HSAP0406S00003189	4.94e-05	0.0023856	1.48747	BC010082	ETNK2		IL6R
376	HSAP0406S00015005	0.0005308	0.0098382	1.48722	NM_080389	DEFB104		IQCE
377	HSAP0406S00004064	2e-07	3.54e-05	1.48486	AL834384	DKFZp434K1526		IRF4
378	HSAP0406S00021531	3.1e-06	0.00032	1.48418	BC011408	KIAA0056		ITGA8
379	HSAP0406S00003081	5.8e-06	0.000515	1.48049	AJ277915	LHX9		ITGB1
380	HSAP0406S00005789	0.0001541	0.004971	1.48043	NM_003284	TNP1		ITIH3
381	HSAP0406S00021670	8.56e-05	0.003377	1.4757	AL831874	DKFZp547D2210		ITIL
382	HSAP0406S00003737	1.24e-05	0.0008872	1.47436	NM_001001914	OR2G3		ITPR1
383	HSAP0406S00024720	8.95e-05	0.0034714	1.47369	AF029900	N/A		JAG2
384	HSAP0406S00005265	0.0001703	0.0052467	1.47292	NM_018086	FIGN		JCG10
385	HSAP0406S00014634	0.0002066	0.0058023	1.4676	NM_001006630	CHRM2		KCNA1
386	HSAP0406S00016476	6.06e-05	0.0027012	1.46668	AY052783	N/A		KCNA10
387	HSAP0406S00032417	0.00048	0.0092445	1.46624	NM_002783	PSG7		KCNA4
388	HSAP0406S00008637	1e-07	1.93e-05	1.46581	NM_207406	FLJ43965		KCNA6
389	HSAP0406S00003758	0.0001158	0.0041426	1.4652	NM_001004688	OR2M2		KCNF1
390	HSAP0406S00023414	1.9e-06	0.0002251	1.46476	AY255587	N/A		KCNIP1
391	HSAP0406S00002892	1.35e-05	0.0009493	1.46413	BC031108	N/A		KCNJ1
392	HSAP0406S00008297	8.08e-05	0.0032609	1.46389	AK000530	N/A		KCNJ12
393	HSAP0406S00016937	0.0005256	0.0097812	1.46095	NM_000507	FBP1		KCNS1
394	HSAP0406S00007092	6e-07	9.14e-05	1.46095	NM_004742	BAIAP1		KCTD1
395	HSAP0406S00003098	< 1e-07	< 1e-07	1.458	NM_018265	FLJ10901		KIAA0056
396	HSAP0406S00036417	0.0001204	0.0042413	1.45763	BC008588	N/A		KIAA0136
397	HSAP0406S00005790	0.0002162	0.0059762	1.45663	BC031974	N/A		KIAA0143
398	HSAP0406S00021599	7.16e-05	0.0030117	1.45508	NM_003213	TEAD4		KIAA0223
399	HSAP0406S00024441	5.3e-06	0.0004834	1.45489	NM_182830	MAMDC1		KIAA0322
400	HSAP0406S00007978	< 1e-07	< 1e-07	1.45483	AB028993	KIAA1070		KIAA0348
401	HSAP0406S00013043	5.22e-05	0.0024754	1.45461	BC043277	N/A		KIAA0379
402	HSAP0406S00021183	8.13e-05	0.0032704	1.45287	NM_213621	HTR3A		KIAA0407
403	HSAP0406S00024858	< 1e-07	< 1e-07	1.45221	NM_021257	NGB		KIAA0466
404	HSAP0406S00019751	0.0005351	0.0098881	1.45163	BC008657	N/A		KIAA0519
405	HSAP0406S00007966	0.0002245	0.0061321	1.45153	AK027052	N/A		KIAA0588
406	HSAP0406S00002807	1.65e-05	0.0011034	1.45105	AF161337	N/A		KIAA0644
407	HSAP0406S00035341	0.0001895	0.0055446	1.45093	NM_019106	2010-09-03		KIAA0655
408	HSAP0406S00017184	0.0002933	0.0071455	1.4506	AK021957	N/A		KIAA0679
409	HSAP0406S00017270	4.9e-05	0.0023757	1.4496	NM_001004450	OR1B1		KIAA0730
410	HSAP0406S00030587	< 1e-07	< 1e-07	1.44935	AK025950	N/A		KIAA0787
411	HSAP0406S00034818	4.2e-05	0.0021554	1.44546	AK129567	N/A		KIAA0802
412	HSAP0406S00010889	0.000128	0.0044113	1.44389	NM_000827	GRIA1		KIAA0804
413	HSAP0406S00003321	1.31e-05	0.0009265	1.44318	AK128135	N/A		KIAA0865
414	HSAP0406S00005104	2.8e-06	0.0002965	1.44277	AK130005	N/A		KIAA0916
415	HSAP0406S00033443	0.0001381	0.004626	1.43828	AK094571	N/A		KIAA0922
416	HSAP0406S00003754	5.2e-06	0.0004754	1.43451	NM_001004687	OR2L3		KIAA1023
417	HSAP0406S00004104	1e-07	1.93e-05	1.43414	NM_144575	CAPN13		KIAA1025
418	HSAP0406S00002394	0.0001327	0.0044926	1.43205	AF274943	N/A		KIAA1029
419	HSAP0406S00004405	1.86e-05	0.0012003	1.43141	AY183476	HZGJ		KIAA1033
420	HSAP0406S00002967	< 1e-07	< 1e-07	1.42903	NM_032267	RGSL2		KIAA1039
421	HSAP0406S00014127	0.0005363	0.0099003	1.42819	AF050657	N/A		KIAA1070
422	HSAP0406S00036680	0.0003176	0.0074921	1.42643	NM_021990	GABRE		KIAA1126
423	HSAP0406S00003766	1.67e-05	0.0011127	1.42639	NM_001004696	OR2T4		KIAA1127
424	HSAP0406S00005730	0.0005407	0.0099703	1.41866	S76756	4R-MAP2		KIAA1147
425	HSAP0406S00017266	0.0002068	0.0058035	1.41734	NM_001004457	OR1N2		KIAA1185
426	HSAP0406S00021532	1.41e-05	0.0009784	1.41725	NM_015261	KIAA0056		KIAA1193
427	HSAP0406S00007484	0.0001281	0.0044113	1.41534	BC015413	ROPN1		KIAA1208
428	HSAP0406S00019513	0.0002881	0.0070843	1.41419	NM_001005237	OR51G1		KIAA1228
429	HSAP0406S00022309	0.0003306	0.0076422	1.41384	NM_006121	KRT1		KIAA1237
430	HSAP0406S00025260	0.0001873	0.0055153	1.41135	NM_033271	BTBD6		KIAA1265
431	HSAP0406S00023999	0.0001147	0.0041152	1.4106	AB020672	KIAA0865		KIAA1271
432	HSAP0406S00012964	0.0004447	0.0088748	1.41051	AF308297	N/A		KIAA1277
433	HSAP0406S00027407	9.7e-06	0.0007477	1.40694	AK125968	N/A		KIAA1296
434	HSAP0406S00003764	4.73e-05	0.0023182	1.40674	NM_001004691	OR2M7		KIAA1298
435	HSAP0406S00032413	0.0001684	0.005213	1.40361	M30629	PSG1		KIAA1302
436	HSAP0406S00025851	0.0001439	0.004762	1.40341	NM_152451	Gup1		KIAA1305
437	HSAP0406S00025261	9.93e-05	0.0037221	1.40288	AF173358	N/A		KIAA1414
438	HSAP0406S00020891	9.9e-06	0.0007584	1.40219	AF009227	N/A		KIAA1415
439	HSAP0406S00004654	2.8e-06	0.0002965	1.40175	BC035315	N/A		KIAA1479
440	HSAP0406S00028763	0.000479	0.0092445	1.39929	BC010612	LOC339263		KIAA1556
441	HSAP0406S00017264	0.0001611	0.0050735	1.39893	X64979	N/A		KIAA1573
442	HSAP0406S00033923	0.0001854	0.0054827	1.39885	NM_181802	UBE2C		KIAA1695
443	HSAP0406S00022117	0.0001505	0.0049118	1.39679	NM_001844	COL2A1		KIAA1739
444	HSAP0406S00021383	0.000116	0.0041457	1.39321	NM_001004463	OR10G7		KIAA1759
445	HSAP0406S00020162	0.0004606	0.0090478	1.39254	NM_001004458	OR1S1		KIAA1870
446	HSAP0406S00003607	< 1e-07	< 1e-07	1.38456	NM_173508	SLC35F3		KIAA1889
447	HSAP0406S00021737	1.3e-05	0.0009229	1.38113	NM_001004328	FLJ16353		KIAA1940
448	HSAP0406S00016634	0.0004519	0.008967	1.38073	NM_207507	FLJ45202		KIAA1944
449	HSAP0406S00003204	6.91e-05	0.0029435	1.38072	BC008124	NFASC		KIAA2015
450	HSAP0406S00032425	0.0002017	0.0057346	1.37916	NM_002780	PSG4		KIF12
451	HSAP0406S00010401	< 1e-07	< 1e-07	1.37605	NM_001801	CDO1		Krit1
452	HSAP0406S00021390	0.0002716	0.0068923	1.37463	NM_001002917	OR8D1		KRT1
453	HSAP0406S00034675	0.000399	0.0084147	1.37201	NM_001005239	OR11H1		KRT3
454	HSAP0406S00002875	3.3e-06	0.0003359	1.37124	NM_005684	GPR52		KRTAP3-1
455	HSAP0406S00014761	0.0003448	0.0078206	1.37069	NM_012365	OR2A5		KRTAP8-1
456	HSAP0406S00003301	6e-07	9.14e-05	1.37028	AF119897	N/A		KRTAP9-4
457	HSAP0406S00003113	2.92e-05	0.0016838	1.36596	NM_003281	TNNI1		KRTHA3A
458	HSAP0406S00003813	< 1e-07	< 1e-07	1.36208	AF395820	N/A		LAMA5
459	HSAP0406S00013254	9e-07	0.0001247	1.3605	AB028946	KIAA1023		LAMB3
460	HSAP0406S00013255	1e-07	1.93e-05	1.35929	AL137525	N/A		LGI2
461	HSAP0406S00034045	0.0001091	0.0039723	1.35866	NM_019888	MC3R		LHFPL1
462	HSAP0406S00003355	2.7e-06	0.0002926	1.35407	BC028194	FLJ12505		LHX4
463	HSAP0406S00029158	0.0004364	0.0088102	1.35338	NM_031958	KRTAP3-1		LHX9
464	HSAP0406S00003382	3.6e-06	0.0003595	1.35208	M19154	N/A		LIAS
465	HSAP0406S00027836	0.0002385	0.0063341	1.35127	BC005052	MARVELD3		LIPA
466	HSAP0406S00030588	1e-07	1.93e-05	1.35081	AL834480	DKFZp762L0911		LMWDSP21
467	HSAP0406S00008533	0.0001878	0.0055212	1.35	NM_013261	PPARGC1A		LMX1A
468	HSAP0406S00003570	0.0004443	0.0088748	1.34856	AL833809	N/A		LOC116236
469	HSAP0406S00000355	0.0003527	0.0079192	1.34805	NM_152290	MGC35194		LOC126295
470	HSAP0406S00035662	3.79e-05	0.0020239	1.3477	U57365	N/A		LOC143458
471	HSAP0406S00009408	3.52e-05	0.0019301	1.34674	AL136932	DKFZp586H1322		LOC159090
472	HSAP0406S00022130	0.0005087	0.0095697	1.34473	AK056003	N/A		LOC201158
473	HSAP0406S00026605	8.28e-05	0.0033055	1.34067	AK024491	FLJ00094		LOC222171
474	HSAP0406S00030586	< 1e-07	< 1e-07	1.34	BC050670	FHOD3		LOC223075
475	HSAP0406S00025437	0.0001302	0.0044496	1.3382	NM_000746	CHRNA7		LOC255313
476	HSAP0406S00031418	6.29e-05	0.002769	1.33642	NM_001800	CDKN2D		LOC256126
477	HSAP0406S00015788	0.0003997	0.0084147	1.33574	NM_024915	TFCP2L3		LOC285533
478	HSAP0406S00002764	1e-07	1.93e-05	1.33421	AK055347	N/A		LOC339263
479	HSAP0406S00012965	0.0002631	0.0067699	1.33318	NM_030949	PPP1R14C		LOC340529
480	HSAP0406S00003760	7.5e-06	0.0006224	1.33194	NM_017504	OR2M4		LOC374946
481	HSAP0406S00004063	3.2e-06	0.0003294	1.33125	NM_032266	C2orf16		LOC389852
482	HSAP0406S00020069	0.0003431	0.0078155	1.32758	NM_001004726	OR4X1		LOC399818
483	HSAP0406S00034716	4.28e-05	0.0021693	1.32614	AK129567	N/A		LOC399947
484	HSAP0406S00018054	0.0002625	0.0067591	1.32084	AY101367	MYO3A		LOC55871
485	HSAP0406S00003736	3.8e-06	0.0003714	1.32083	NM_001001915	OR2G2		LOC57228
486	HSAP0406S00015591	0.0001743	0.0053342	1.32041	AY040546	RPESP		LOC65121
487	HSAP0406S00025731	7.02e-05	0.0029698	1.32026	AK021660	N/A		LOC65122
488	HSAP0406S00025096	0.0002657	0.0068108	1.32012	AK128397	N/A		LOC84643
489	HSAP0406S00026602	2e-07	3.54e-05	1.31998	NM_022773	FLJ12681		LRRC15
490	HSAP0406S00019975	1.21e-05	0.0008708	1.31939	U79302	N/A		LSAMP
491	HSAP0406S00002831	5.91e-05	0.0026753	1.31891	AK130711	N/A		LSP1
492	HSAP0406S00009406	6.52e-05	0.0028364	1.31818	BC044932	N/A		LYPDC1
493	HSAP0406S00014725	0.0003662	0.0080358	1.31811	NM_001001658	OR9A2		MAGEB6
494	HSAP0406S00009407	3.43e-05	0.001892	1.3146	NM_015196	KIAA0922		MAGEE2
495	HSAP0406S00014510	0.0002776	0.0069678	1.31353	NM_000845	GRM8		MAGI-1
496	HSAP0406S00030585	< 1e-07	< 1e-07	1.31245	AB051482	KIAA1695		MAMDC1
497	HSAP0406S00020120	0.0004549	0.0089972	1.31186	NM_001005245	OR5M11		MAN1A1
498	HSAP0406S00007089	5.56e-05	0.0025802	1.30863	U80754	MAGI-1		MAP4K4
499	HSAP0406S00018168	0.0005016	0.0094879	1.30661	X12949	N/A		MAP4K5
500	HSAP0406S00015017	2e-05	0.001264	1.30644	BC058833	N/A		MAPK12
501	HSAP0406S00035708	3e-07	5.05e-05	1.30637	NM_173495	PTCHD1		MAPKAPK3
502	HSAP0406S00021475	4.1e-05	0.0021218	1.30441	S78737	ATP-regulatedpotassiumchannel		MARCH-VI
503	HSAP0406S00022115	0.0003382	0.0077349	1.30354	BC007252	COL2A1		MARVELD3
504	HSAP0406S00006550	0.0002053	0.0057878	1.30328	AK124766	N/A		MAS1L
505	HSAP0406S00014710	0.0005418	0.0099743	1.30244	AY052784	N/A		MATP
506	HSAP0406S00021628	< 1e-07	< 1e-07	1.30232	NM_002235	KCNA6		MaxiK
507	HSAP0406S00016907	0.0004314	0.0087436	1.30002	NM_004148	NINJ1		MBD3
508	HSAP0406S00032424	0.0002513	0.0065978	1.29836	AF289606	N/A		MC3R
509	HSAP0406S00024442	2.2e-06	0.0002517	1.29781	AY369208	MDGA2		MC4R
510	HSAP0406S00003270	1.8e-06	0.0002146	1.29609	BC001943	SARG		MCSP
511	HSAP0406S00008295	7.77e-05	0.0031882	1.29357	BC036769	FGFRL1		MDGA2
512	HSAP0406S00021108	0.0002513	0.0065978	1.29309	NM_207645	LOC399947		MDS013
513	HSAP0406S00033888	0.0003589	0.0080025	1.29083	NM_002251	KCNS1		ME5
514	HSAP0406S00019495	0.0003709	0.0080837	1.29043	NM_001005171	OR52K1		MEGF7
515	HSAP0406S00004934	0.0001965	0.0056346	1.28519	NM_014440	IL1F6		MERTK
516	HSAP0406S00019078	1.04e-05	0.0007853	1.2817	BC044830	N/A		MFI2
517	HSAP0406S00014764	0.0001252	0.0043515	1.28121	NM_001005480	OR2A2		MGC10334
518	HSAP0406S00029842	0.0001348	0.0045402	1.28089	AF447872	FP2747		MGC10485
519	HSAP0406S00001692	0.0003475	0.0078577	1.28083	AL390972	N/A		MGC16664
520	HSAP0406S00024078	0.0002561	0.0066548	1.28036	AK126042	N/A		MGC17791
521	HSAP0406S00002605	6.74e-05	0.0029013	1.27783	NM_001004478	OR10Z1		MGC23401
522	HSAP0406S00003271	3.7e-06	0.0003665	1.27714	NM_023938	SARG		MGC29643
523	HSAP0406S00026604	0.0001533	0.0049593	1.27662	NM_014587	SOX8		MGC29898
524	HSAP0406S00003860	0.0004275	0.008698	1.27649	NM_182626	FLJ25102		MGC35030
525	HSAP0406S00024719	0.0002686	0.0068445	1.2755	NM_003813	ADAM21		MGC35194
526	HSAP0406S00036405	4.49e-05	0.0022418	1.27548	AY358208	N/A		MGC39520
527	HSAP0406S00004785	0.0004121	0.0085547	1.2737	AK093084	N/A		MGC45428
528	HSAP0406S00013526	5.9e-06	0.0005226	1.2736	NM_000823	GHRHR		MGC78665
529	HSAP0406S00026248	0.0002095	0.0058436	1.27159	AK097452	N/A		MGEA5
530	HSAP0406S00023561	0.0001516	0.0049292	1.27106	U82303	N/A		MLL/AF10fusion
531	HSAP0406S00035736	0.0002881	0.0070843	1.26858	NM_014271	IL1RAPL1		MLLT10
532	HSAP0406S00005109	3e-07	5.05e-05	1.26697	NM_207481	FLJ34870		MOCOS
533	HSAP0406S00003738	1e-07	1.93e-05	1.26626	NM_001005487	OR13G1		MPP7
534	HSAP0406S00024607	0.0002256	0.0061348	1.26555	AJ303367	CHR14SYT		MRGX3
535	HSAP0406S00029871	1e-07	1.93e-05	1.26455	NM_001050	SSTR2		MRGX4
536	HSAP0406S00002935	0.0002325	0.0062487	1.26429	NM_173509	MGC16664		MST112
537	HSAP0406S00036536	0.0005073	0.0095565	1.26154	NM_001004486	OR13H1		MST120
538	HSAP0406S00020095	0.0004248	0.0086883	1.26073	NM_032681	TRIM51		mt-TK
539	HSAP0406S00009510	0.0001281	0.0044113	1.259	AF327560	N/A		MUM1
540	HSAP0406S00024390	1e-05	0.0007629	1.2586	NM_001001553	STELLAR		MUM-1
541	HSAP0406S00019770	0.0003528	0.0079192	1.25826	NM_054031	MRGX3		MYBPH
542	HSAP0406S00002296	0.0003981	0.0084062	1.25684	NM_005987	SPRR1A		MYCBP2
543	HSAP0406S00007006	8.48e-05	0.0033562	1.25613	NM_020678	HT017		MYO1C
544	HSAP0406S00027443	5.26e-05	0.0024912	1.25541	AK126710	N/A		MYO3A
545	HSAP0406S00016728	0.0001524	0.0049389	1.25503	AF536753	N/A		MYOM1
546	HSAP0406S00020158	0.0003577	0.0079977	1.25501	NM_001005211	OR9I1		MYT1-l
547	HSAP0406S00019504	0.0003599	0.0080091	1.25452	NM_152430	D-GPCR		NCOA7
548	HSAP0406S00009523	0.0004952	0.0094055	1.25447	NM_021973	HAND2		NEDL1
549	HSAP0406S00017223	0.0003465	0.0078424	1.25291	NM_014618	DBC1		NFASC
550	HSAP0406S00002809	0.0002047	0.0057798	1.25227	AJ297255	factorV		NFATC4
551	HSAP0406S00033914	0.0005101	0.0095738	1.25205	NM_147198	WFDC9		NFIC
552	HSAP0406S00029603	7.01e-05	0.0029698	1.25093	NM_032559	LOC84643		NGB
553	HSAP0406S00019750	0.0003604	0.0080091	1.24831	NM_175058	PLEKHA7		NGFB
554	HSAP0406S00018555	0.000362	0.0080245	1.24736	U11058	MaxiK		NGL-1
555	HSAP0406S00030589	< 1e-07	< 1e-07	1.24715	AK026370	N/A		NID2
556	HSAP0406S00003533	4.8e-06	0.0004455	1.24441	AB046776	KIAA1556		NINJ1
557	HSAP0406S00000823	0.0005236	0.0097489	1.24369	BC009035	N/A		NLGN1
558	HSAP0406S00002887	2.3e-05	0.001387	1.24224	AL049689	N/A		NN8-4AG
559	HSAP0406S00020128	9.05e-05	0.0034991	1.24145	NM_001005210	FLJ45686		NPR1
560	HSAP0406S00002898	6.6e-06	0.0005695	1.2408	AJ278348	PAPPE		NRG1
561	HSAP0406S00009985	3e-07	5.05e-05	1.24004	AK098579	N/A		NRN1
562	HSAP0406S00011596	0.0003581	0.0079991	1.23986	NM_001005216	OR2J3		NTRK3
563	HSAP0406S00010359	8.83e-05	0.0034357	1.2373	BC040592	TSLP		NUDT11
564	HSAP0406S00011472	0.0004899	0.0093626	1.23656	NM_005495	SLC17A4		NXN
565	HSAP0406S00022577	0.0003164	0.0074829	1.23263	AL831941	DKFZp547C1010		NXPH2
566	HSAP0406S00004655	5.6e-06	0.0005008	1.23099	AK001778	N/A		OA48-18
567	HSAP0406S00016640	0.0004317	0.0087448	1.22743	AK127145	N/A		OBFC1
568	HSAP0406S00036404	1.71e-05	0.0011353	1.22712	NM_178175	LHFPL1		OCT/plexin-A2
569	HSAP0406S00024099	0.0004794	0.0092445	1.22702	NM_172194	OR4Q3		ODF1
570	HSAP0406S00033358	9.45e-05	0.0036121	1.22609	AK124224	N/A		OGG1
571	HSAP0406S00018362	9.22e-05	0.0035462	1.22579	AY182028	N/A		OGT
572	HSAP0406S00017869	0.0001846	0.0054766	1.22513	NM_024803	TUBAL3		OR10A5
573	HSAP0406S00004653	8.13e-05	0.0032704	1.22194	NM_018271	FLJ10916		OR10A7
574	HSAP0406S00016783	4.65e-05	0.0023029	1.22146	AK125847	N/A		OR10G7
575	HSAP0406S00011670	0.0002878	0.0070843	1.21846	BC047303	C6orf134		OR10G8
576	HSAP0406S00027817	8.28e-05	0.0033055	1.21832	AL834340	DKFZp761M1613		OR10Z1
577	HSAP0406S00012672	0.0001575	0.0050202	1.21709	NM_003880	WISP3		OR11H1
578	HSAP0406S00035819	0.0004451	0.0088748	1.21708	AF533018	LMWDSP21		OR12D2
579	HSAP0406S00028587	8e-07	0.0001129	1.21687	NM_145301	LOC201158		OR13C3
580	HSAP0406S00003752	8.67e-05	0.0034022	1.21531	NM_001004686	OR2L2		OR13G1
581	HSAP0406S00010222	< 1e-07	< 1e-07	1.2143	NM_003248	THBS4		OR13H1
582	HSAP0406S00008296	0.0001698	0.0052401	1.21302	BC013955	FGFRL1		OR1A2
583	HSAP0406S00024734	2.97e-05	0.001702	1.21236	NM_004296	RGS6		OR1B1
584	HSAP0406S00033476	4.62e-05	0.0022942	1.21087	NM_001819	CHGB		OR1C1
585	HSAP0406S00021023	0.0002658	0.0068108	1.209	AK057372	N/A		OR1G1
586	HSAP0406S00015284	0.000137	0.0045975	1.20601	NM_001440	EXTL3		OR1N1
587	HSAP0406S00017180	1e-07	1.93e-05	1.20522	NM_001633	AMBP		OR1N2
588	HSAP0406S00016434	0.0001771	0.0053828	1.20403	NM_152570	FLJ31810		OR1S1
589	HSAP0406S00015283	7.33e-05	0.0030588	1.20381	AB011091	KIAA0519		OR1S2
590	HSAP0406S00019864	0.0003341	0.0076845	1.20132	NM_002233	KCNA4		OR2A2
591	HSAP0406S00001509	< 1e-07	< 1e-07	1.20097	NM_152996	SIAT7C		OR2A5
592	HSAP0406S00003743	2.31e-05	0.0013908	1.19858	NM_207314	UNQ9373		OR2AG2
593	HSAP0406S00003305	0.0005319	0.0098456	1.19796	NM_000228	LAMB3		OR2AK2
594	HSAP0406S00013285	1e-07	1.93e-05	1.19729	AK000997	N/A		OR2G2
595	HSAP0406S00013253	9.2e-06	0.0007228	1.19214	NM_152558	IQCE		OR2G3
596	HSAP0406S00019607	0.0003385	0.0077349	1.19115	NM_001004490	OR2AG2		OR2J3
597	HSAP0406S00016782	0.000222	0.0060909	1.19111	AK128229	N/A		OR2L13
598	HSAP0406S00006405	2e-07	3.54e-05	1.19061	NM_138484	SGOL1		OR2L2
599	HSAP0406S00019557	0.0004856	0.0093192	1.18996	NM_001001922	OR52N5		OR2L3
600	HSAP0406S00030349	5.28e-05	0.0024941	1.18917	NM_003803	MYOM1		OR2L8
601	HSAP0406S00017084	0.0001587	0.0050324	1.18862	BC014610	ACTL7A		OR2M2
602	HSAP0406S00018574	0.0004392	0.0088433	1.18647	NM_006926	SFTPA2		OR2M3
603	HSAP0406S00024739	0.0005082	0.0095685	1.18507	AK126933	N/A		OR2M4
604	HSAP0406S00010972	1.8e-05	0.0011739	1.18456	NM_021911	GABRB2		OR2M5
605	HSAP0406S00024738	3.82e-05	0.002037	1.18456	AK124946	N/A		OR2M7
606	HSAP0406S00009412	3.03e-05	0.001731	1.18369	NM_173662	LOC285533		OR2T1
607	HSAP0406S00001411	0.0002799	0.0069922	1.18291	AK022571	N/A		OR2T10
608	HSAP0406S00003698	0.0001551	0.0049782	1.18211	BC042481	MGC35030		OR2T11
609	HSAP0406S00032422	0.000103	0.0038143	1.18144	L36607	N/A		OR2T12
610	HSAP0406S00014780	6e-07	9.14e-05	1.18051	NM_014141	CNTNAP2		OR2T2
611	HSAP0406S00002603	0.0005312	0.0098407	1.17931	NM_001005189	OR6Y1		OR2T27
612	HSAP0406S00016243	2.24e-05	0.0013688	1.17832	NM_021240	DMRT3		OR2T29
613	HSAP0406S00024128	0.0004539	0.0089919	1.17827	AK098544	N/A		OR2T3
614	HSAP0406S00029872	7e-07	0.0001032	1.17705	BC009522	N/A		OR2T33
615	HSAP0406S00001926	0.0004938	0.0093886	1.17604	NM_002506	NGFB		OR2T34
616	HSAP0406S00004652	0.0003335	0.0076803	1.17497	NM_001443	FABP1		OR2T35
617	HSAP0406S00005101	0.0001571	0.0050162	1.17392	NM_001508	GPR39		OR2T4
618	HSAP0406S00009464	6e-07	9.14e-05	1.17362	AK057537	N/A		OR2T5
619	HSAP0406S00019136	1.9e-06	0.0002251	1.17356	S41878	TK25		OR2T6
620	HSAP0406S00030348	9.65e-05	0.0036469	1.17299	X69090	N/A		OR2T8
621	HSAP0406S00002295	0.0003024	0.0073018	1.17252	NM_173080	SPRR4		OR2W5
622	HSAP0406S00027025	0.0002869	0.0070806	1.17054	NM_001002911	GPR139		OR4M1
623	HSAP0406S00005102	0.0001302	0.0044496	1.16834	BC040046	LYPDC1		OR4M2
624	HSAP0406S00021107	0.0003299	0.0076308	1.16814	BC035798	N/A		OR4Q3
625	HSAP0406S00007088	5.07e-05	0.002423	1.16786	U96115	N/A		OR4X1
626	HSAP0406S00003753	2.16e-05	0.0013354	1.16638	X64978	N/A		OR51G1
627	HSAP0406S00001409	0.0003099	0.0073957	1.16567	NM_020925	KIAA1573		OR51S1
628	HSAP0406S00009812	8.88e-05	0.0034515	1.1647	BC064405	MATP		OR51T1
629	HSAP0406S00003261	1.34e-05	0.0009459	1.16447	NM_153758	IL19		OR52A1
630	HSAP0406S00033847	6.53e-05	0.0028374	1.16349	NM_133170	PTPRT		OR52I2
631	HSAP0406S00036180	5.98e-05	0.0026871	1.16289	NM_138703	MAGEE2		OR52K1
632	HSAP0406S00035773	0.000288	0.0070843	1.16171	AF049615	N/A		OR52L1
633	HSAP0406S00003082	1.11e-05	0.0008196	1.16128	NM_020204	LHX9		OR52N5
634	HSAP0406S00034337	0.0003824	0.0082399	1.1598	NM_175857	KRTAP8-1		OR5BF1
635	HSAP0406S00001830	0.0002332	0.0062538	1.15805	NM_005549	KCNA10		OR5BU1
636	HSAP0406S00010887	1.58e-05	0.0010722	1.15795	NM_000171	GLRA1		OR5L2
637	HSAP0406S00028588	8.06e-05	0.0032564	1.15769	AF337810	CDRT1		OR5M11
638	HSAP0406S00030659	0.0002795	0.0069917	1.15693	L29143	N/A		OR6A2
639	HSAP0406S00011606	0.0002359	0.0062941	1.15553	NM_052967	MAS1L		OR6F1
640	HSAP0406S00019948	0.0001856	0.0054842	1.15511	BC041374	NGL-1		OR6K2
641	HSAP0406S00028185	2.73e-05	0.0015891	1.15452	AK130278	N/A		OR6T1
642	HSAP0406S00002628	7.72e-05	0.0031712	1.15099	X56692	N/A		OR6X1
643	HSAP0406S00013633	7.54e-05	0.0031252	1.14984	AB002320	KIAA0322		OR6Y1
644	HSAP0406S00004412	0.000254	0.0066424	1.14929	NM_014482	BMP10		OR8D1
645	HSAP0406S00025476	0.000497	0.0094251	1.14901	NM_020660	CX36		OR9A2
646	HSAP0406S00003032	3.5e-06	0.0003533	1.14862	NM_199051	DBCCR1L		OR9I1
647	HSAP0406S00001947	0.0003448	0.0078206	1.14861	NM_020440	PTGFRN		ORMDL1
648	HSAP0406S00036069	0.0002821	0.0070188	1.14782	Y09858	N/A		OSBPL8
649	HSAP0406S00014727	0.0002545	0.006646	1.1478	AF286696	N/A		P2RX5
650	HSAP0406S00019565	0.0001302	0.0044496	1.1476	NM_001005173	OR52L1		PAFAH2
651	HSAP0406S00003854	0.000118	0.0041928	1.14674	NM_207480	UNQ5830		PALM
652	HSAP0406S00028759	1e-06	0.0001345	1.14643	NM_021012	KCNJ12		PAPPA2
653	HSAP0406S00024318	0.0001472	0.0048298	1.14526	NM_001836	CMA1		PAPPE
654	HSAP0406S00019795	0.0001319	0.0044794	1.14475	NM_153347	FLJ90119		PARP10
655	HSAP0406S00032366	0.0002279	0.0061882	1.14435	NM_006890	CEACAM7		PARP8
656	HSAP0406S00003298	3.78e-05	0.0020215	1.14383	X87831	OCT/plexin-A2		PARVG
657	HSAP0406S00013529	7.08e-05	0.0029917	1.14166	S79912	GHRH-R		PBX1
658	HSAP0406S00003785	1.04e-05	0.0007853	1.14074	AK126079	N/A		PCBP3
659	HSAP0406S00029659	0.0001611	0.0050735	1.13905	NM_175904	FLJ40121		PCDHGA10
660	HSAP0406S00026036	2.8e-06	0.0002965	1.13515	AK002058	N/A		PCDHGA11
661	HSAP0406S00023412	0.0002671	0.0068299	1.13407	NM_198827	GPR133		PCDHGA12
662	HSAP0406S00032990	0.0005004	0.0094749	1.13329	NM_173857	VN1R4		PCDHGA2
663	HSAP0406S00019083	0.0004467	0.0088971	1.13325	BC034627	N/A		PCDHGA3
664	HSAP0406S00015794	8.03e-05	0.0032514	1.13288	NM_024410	ODF1		PCDHGA4
665	HSAP0406S00014721	0.000269	0.0068499	1.13273	NM_019841	TRPV5		PCDHGA5
666	HSAP0406S00003739	2.73e-05	0.0015891	1.13228	NM_001005286	OR6F1		PCDHGA6
667	HSAP0406S00036162	0.000476	0.0092321	1.13219	BC041956	LOC340529		PCDHGA7
668	HSAP0406S00013461	0.0002051	0.0057866	1.13054	NM_022150	C7orf9		PCDHGA8
669	HSAP0406S00003369	< 1e-07	< 1e-07	1.13021	AK123409	N/A		PCDHGB1
670	HSAP0406S00021244	0.0004163	0.0086011	1.12992	AK124886	N/A		PCDHGB2
671	HSAP0406S00028951	0.0001236	0.0043046	1.12925	NM_002986	CCL11		PCDHGB3
672	HSAP0406S00006974	0.0004653	0.0090965	1.12898	AF116713	N/A		PCDHGB5
673	HSAP0406S00026345	0.0004249	0.0086883	1.12876	AF058389	NTRK3		PCDHGB6
674	HSAP0406S00018052	0.0004336	0.0087689	1.12627	NM_020752	GPR158		PCDHGB7
675	HSAP0406S00007419	8.8e-05	0.0034313	1.12539	U20760	N/A		PCDHGC3
676	HSAP0406S00028584	7.92e-05	0.0032282	1.12446	BC029542	N/A		PCDHGC5
677	HSAP0406S00025813	0.0003143	0.0074594	1.12444	AK126787	N/A		PCSK5
678	HSAP0406S00016674	0.0002169	0.0059911	1.12413	NM_174950	FLJ30435		PDCD1
679	HSAP0406S00019510	0.0001814	0.005421	1.12107	NM_001004759	OR51T1		PDCD4
680	HSAP0406S00013732	8e-05	0.0032464	1.11967	AK127327	N/A		PDE2A
681	HSAP0406S00008298	7.66e-05	0.0031571	1.11919	AK124578	N/A		PDE7
682	HSAP0406S00008894	0.0004448	0.0088748	1.11724	AY358789	N/A		PDE7A
683	HSAP0406S00018167	0.0003972	0.0084016	1.11619	NM_020975	RET		PDIR
684	HSAP0406S00031546	0.000408	0.0084923	1.11562	BC035819	LOC256126		PECAM1
685	HSAP0406S00001693	0.0002525	0.0066126	1.11501	AK024654	N/A		PECAM-1,CD31/EndoCAM
686	HSAP0406S00019806	5.76e-05	0.0026345	1.11378	NM_003476	CSRP3		PHACTR3
687	HSAP0406S00028260	3.89e-05	0.0020588	1.11315	NM_012352	OR1A2		PHEMX
688	HSAP0406S00016622	0.0002751	0.0069381	1.11245	AB095935	KIAA2015		PHOX1
689	HSAP0406S00008502	0.0002013	0.0057321	1.11212	NM_005130	FGFBP1		PIG11
690	HSAP0406S00020092	0.0002231	0.0061165	1.11117	NM_001004739	OR5L2		PIP5K3
691	HSAP0406S00028693	0.0002554	0.0066548	1.10843	NM_031456	FBXW10		PLAC8
692	HSAP0406S00011707	0.0001892	0.0055446	1.10803	NM_080870	DPCR1		PLCB4
693	HSAP0406S00007967	0.0001063	0.0038858	1.10683	AL157482	DKFZp762K137		PLEKHA7
694	HSAP0406S00021382	0.0005093	0.0095697	1.10674	NM_001004464	OR10G8		PLS3
695	HSAP0406S00003755	5.34e-05	0.0025065	1.10659	NM_175911	OR2L13		PLXNB1
696	HSAP0406S00019858	0.0005037	0.0095081	1.10648	AY054392	BDNF		PLXND1
697	HSAP0406S00034899	0.0003128	0.0074431	1.10481	S82637	F8		POLE1
698	HSAP0406S00016010	1.1e-06	0.0001448	1.10462	AB032952	KIAA1126		POLRMT
699	HSAP0406S00029058	5.58e-05	0.0025825	1.10346	NM_001004334	GPR158L1		PORCN
700	HSAP0406S00022427	0.0003315	0.0076534	1.10138	NM_001005280	OR10A7		pp14737
701	HSAP0406S00007979	< 1e-07	< 1e-07	1.09991	NM_014932	NLGN1		PP2135
702	HSAP0406S00010217	0.0002934	0.0071455	1.0992	AL831986	DKFZp451G223		PPARGC1A
703	HSAP0406S00035867	0.0001746	0.0053349	1.09831	NM_205856	LOC389852		PPM1B
704	HSAP0406S00033596	0.0004845	0.0093127	1.09691	AF494536	N/A		PPP1R14A
705	HSAP0406S00010983	0.000478	0.0092445	1.09669	AB032953	KIAA1127		PPP1R14C
706	HSAP0406S00022300	0.0004923	0.0093843	1.0966	M21389	N/A		PPP2CB
707	HSAP0406S00021378	0.0005092	0.0095697	1.0962	NM_001005187	OR6T1		PREX1
708	HSAP0406S00002293	0.0001754	0.0053413	1.09549	NM_030663	MCSP		PRKACB
709	HSAP0406S00002917	5.35e-05	0.002508	1.09451	AK096082	N/A		PRKCB1
710	HSAP0406S00007358	0.0002841	0.0070423	1.09416	NM_002338	LSAMP		PRKCZ
711	HSAP0406S00011010	0.0001959	0.0056261	1.09347	NM_014592	KCNIP1		PRL
712	HSAP0406S00001966	5.77e-05	0.0026345	1.09243	BC038419	HSD3B2		PRSS3
713	HSAP0406S00012316	4.7e-06	0.0004395	1.09213	NM_138569	C6orf142		PSD4
714	HSAP0406S00007965	9.88e-05	0.003711	1.09201	BC033635	FAD104		PSEN2
715	HSAP0406S00005103	8.6e-06	0.0006919	1.09073	NM_144586	MGC29643		PSG1
716	HSAP0406S00033682	0.0002003	0.0057109	1.09067	NM_178466	C20orf71		PSG4
717	HSAP0406S00003109	0.0002016	0.0057346	1.08999	AK125236	N/A		PSG7
718	HSAP0406S00014729	7.02e-05	0.0029698	1.08925	NM_176881	TAS2R39		PSMA1
719	HSAP0406S00024520	0.0001995	0.0056984	1.0891	BC021726	SAMD4		PTCHD1
720	HSAP0406S00019740	0.0004369	0.0088114	1.08669	NM_001741	CALCA		PTGFRN
721	HSAP0406S00009465	6e-07	9.14e-05	1.08551	NM_032136	DKFZP434L1717		PTPRT
722	HSAP0406S00021444	9.52e-05	0.0036201	1.08354	NM_212555	UNQ3112		PVALB
723	HSAP0406S00002830	0.0003099	0.0073957	1.083	M95929	PHOX1		RAB1A
724	HSAP0406S00017055	0.0001559	0.0049865	1.08235	NM_001001961	OR13C3		RAB37
725	HSAP0406S00008400	3.59e-05	0.0019539	1.08064	AK127243	N/A		RAP1GDS1
726	HSAP0406S00029181	0.0005103	0.0095738	1.07996	NM_033191	KRTAP9-4		RARB
727	HSAP0406S00022535	0.0004661	0.0091014	1.07983	NM_148897	SDR-O		RASA2
728	HSAP0406S00016244	0.0004071	0.0084923	1.07929	AF193873	N/A		RASAL2
729	HSAP0406S00021536	8e-07	0.0001129	1.07887	AK125373	N/A		RBL2
730	HSAP0406S00016729	0.0005146	0.0096314	1.07858	NM_206946	TRPM3		RBM17
731	HSAP0406S00016705	0.0005346	0.0098875	1.07777	AK127288	N/A		RET
732	HSAP0406S00002891	2.52e-05	0.0014928	1.07626	X98085	N/A		RGMA
733	HSAP0406S00028259	7.31e-05	0.0030588	1.07574	NM_003555	OR1G1		RGS19IP1
734	HSAP0406S00000356	0.000412	0.0085547	1.07466	NM_023013	LOC65121		RGS6
735	HSAP0406S00003751	2e-06	0.0002339	1.07411	NM_001004491	OR2AK2		RGSL2
736	HSAP0406S00022312	0.0003415	0.0077963	1.07297	AJ628418	KRT3		RMP
737	HSAP0406S00035731	0.0003069	0.007367	1.07203	NM_173523	MAGEB6		RNASE6PL
738	HSAP0406S00019226	7.54e-05	0.0031252	1.07177	NM_001005463	DKFZp667B0210		RNF141
739	HSAP0406S00005139	0.0003201	0.0075126	1.07052	NM_007226	NXPH2		RNPEPL1
740	HSAP0406S00000360	4.98e-05	0.0023924	1.07042	NM_023014	LOC65122		ROMK1
741	HSAP0406S00019522	0.0003877	0.0082911	1.07023	NM_012375	OR52A1		ROPN1
742	HSAP0406S00019498	0.0001629	0.0050868	1.06668	NM_001005170	OR52I2		ROR1
743	HSAP0406S00007405	0.0004795	0.0092445	1.06624	NM_016298	FBXO40		RORB
744	HSAP0406S00033916	0.0003985	0.0084098	1.06613	BC062670	N/A		RPA3
745	HSAP0406S00015315	0.0002307	0.0062275	1.0643	NM_013959	NRG1		RPESP
746	HSAP0406S00033594	4.23e-05	0.0021558	1.06419	NM_005492	CST8		RPS6KA4
747	HSAP0406S00013534	8.35e-05	0.0033262	1.0636	NM_194300	LOC223075		RRAS2
748	HSAP0406S00015700	1.7e-06	0.000204	1.06251	AF116672	N/A		RXRG
749	HSAP0406S00011060	0.0001752	0.0053396	1.06173	NM_198567	FLJ44216		S100A16
750	HSAP0406S00014678	0.0002976	0.0072095	1.0613	BC049193	KIAA1277		SACS
751	HSAP0406S00011601	0.0003808	0.0082199	1.05979	NM_013936	OR12D2		SAMD4
752	HSAP0406S00003742	9e-06	0.0007116	1.05978	NM_012353	OR1C1		SARG
753	HSAP0406S00019949	0.0001463	0.0048088	1.05908	NM_020929	NGL-1		SBF2
754	HSAP0406S00016009	5e-07	8.05e-05	1.0588	BC033223	KIAA1126		SDC4
755	HSAP0406S00002949	2.8e-06	0.0002965	1.05869	NM_033343	LHX4		SDR-O
756	HSAP0406S00011062	0.0003183	0.0074942	1.05864	BC032390	FLJ44216		SEMA4C
757	HSAP0406S00017563	0.0001724	0.0052893	1.05747	AK128819	N/A		SEMA6D
758	HSAP0406S00002910	1.2e-06	0.0001557	1.05742	NM_170692	RASAL2		SERPINA12
759	HSAP0406S00024518	5.69e-05	0.002611	1.05709	NM_015589	SAMD4		SESN1
760	HSAP0406S00036061	0.0001948	0.0056105	1.0569	NM_198451	FOXR2		SFTPA2
761	HSAP0406S00002609	0.000515	0.0096314	1.05681	NM_001005279	OR6K2		sGC
762	HSAP0406S00025051	0.0004609	0.0090478	1.05594	NM_173850	SERPINA12		SGOL1
763	HSAP0406S00019855	0.0003442	0.0078192	1.05544	AY054403	N/A		SH3BP3
764	HSAP0406S00019165	0.0004999	0.0094703	1.05528	AL713636	N/A		SH3BP4
765	HSAP0406S00027032	3.96e-05	0.0020756	1.05475	NM_182617	HXMA		SIAT7C
766	HSAP0406S00017362	0.0002566	0.0066631	1.05465	AK095679	N/A		SLC12A9
767	HSAP0406S00008540	6e-07	9.14e-05	1.05379	NM_018176	LGI2		SLC17A4
768	HSAP0406S00002801	0.0001701	0.0052449	1.05189	NM_001937	DPT		SLC19A1
769	HSAP0406S00026037	5.5e-06	0.0004955	1.04986	AL833876	DKFZp762N186		SLC27A1
770	HSAP0406S00002753	6.82e-05	0.0029255	1.04953	NM_006917	RXRG		SLC27A2
771	HSAP0406S00019797	6.11e-05	0.0027125	1.04715	NM_173588	FLJ37794		SLC35F3
772	HSAP0406S00011607	0.0004974	0.0094278	1.04566	NM_006398	UBD		SLC38A2
773	HSAP0406S00003499	3.31e-05	0.0018451	1.04361	AF387613	N/A		SLC9A3R1
774	HSAP0406S00022876	< 1e-07	< 1e-07	1.04331	NM_153364	MGC39520		smap-4
775	HSAP0406S00036048	0.0004567	0.0090086	1.04211	NM_177555	TRO		smap-6
776	HSAP0406S00012865	0.0001993	0.0056971	1.03848	NM_015439	C6orf80		SMBP
777	HSAP0406S00001849	4.96e-05	0.002389	1.03847	AF290004	N/A		SMYD5
778	HSAP0406S00033915	3.92e-05	0.0020634	1.03669	NM_080753	WFDC10A		SNAP23
779	HSAP0406S00030719	7.7e-06	0.0006333	1.03623	NM_002091	GRP		SNCB
780	HSAP0406S00007087	2.96e-05	0.0016989	1.03538	AK127518	N/A		SNTA1
781	HSAP0406S00020474	0.0002909	0.0071179	1.03536	NM_172230	SYVN1		SNX15
782	HSAP0406S00014022	3.18e-05	0.0017916	1.03464	X77748	N/A		SOCS2
783	HSAP0406S00006124	5e-07	8.05e-05	1.03342	BC039904	HDAC4		SORBS1
784	HSAP0406S00008133	0.0002415	0.0063926	1.03319	NM_001004312	MGC78665		SOX11
785	HSAP0406S00021477	9.6e-06	0.0007416	1.03285	NM_000220	KCNJ1		SOX8
786	HSAP0406S00014651	0.0001749	0.0053349	1.03161	AL136736	DKFZp434O0710		SP1
787	HSAP0406S00003449	2.01e-05	0.0012682	1.03128	NM_152495	FLJ38993		SPAG11
788	HSAP0406S00013286	2.2e-06	0.0002517	1.02926	AK001186	N/A		SPAG6
789	HSAP0406S00027589	0.0003912	0.0083337	1.02861	AL137484	DKFZp434I2330		SPRR1A
790	HSAP0406S00021478	2.61e-05	0.0015363	1.02764	U03884	ROMK1		SPRR4
791	HSAP0406S00020473	0.0003371	0.0077342	1.02695	AK074148	FLJ00221		SSTR2
792	HSAP0406S00003017	3.63e-05	0.0019691	1.0263	AJ306906	FIBL-6		STAC
793	HSAP0406S00016663	0.0003871	0.0082879	1.02575	NM_032250	ANKRD20A		STAT2
794	HSAP0406S00026458	0.0003028	0.0073067	1.02466	AF020763	N/A		STELLAR
795	HSAP0406S00014984	0.0003913	0.0083337	1.02124	NM_207411	UNQ2754		STX7
796	HSAP0406S00021069	0.0004309	0.0087382	1.02083	NM_021571	ICEBERG		SULT4A1
797	HSAP0406S00021476	1.91e-05	0.0012197	1.0204	NM_153767	KCNJ1		SUPT3H
798	HSAP0406S00012779	0.0003684	0.0080556	1.01936	AJ251209	EPB41L2		SYNJ2
799	HSAP0406S00025439	2.23e-05	0.0013672	1.01931	AL117445	DKFZp434L187		SYNPO
800	HSAP0406S00007112	1.1e-06	0.0001448	1.01807	AK057852	N/A		SYVN1
801	HSAP0406S00030582	3.52e-05	0.0019301	1.01617	NM_017947	MOCOS		TACC2
802	HSAP0406S00033851	0.0003131	0.0074431	1.01609	AK123176	N/A		TAFA5
803	HSAP0406S00024889	0.0001206	0.0042443	1.01453	AF093774	N/A		TAOK3
804	HSAP0406S00002968	< 1e-07	< 1e-07	1.01315	AK128152	N/A		TAP2
805	HSAP0406S00002896	1.18e-05	0.0008559	1.01166	AF311940	N/A		TAS2R39
806	HSAP0406S00003932	0.0001308	0.0044619	1.01099	M17367	APOB		TCERG1L
807	HSAP0406S00002301	0.0005422	0.0099743	1.01079	M20030	N/A		TEAD4
808	HSAP0406S00019610	0.0003603	0.0080091	1.00989	NM_178168	OR10A5		TEF-3
809	HSAP0406S00013634	0.0002864	0.0070803	1.00953	NM_015052	NEDL1		TFAP2C
810	HSAP0406S00019494	0.0003971	0.0084016	1.00788	AF143328	N/A		TFCP2L3
811	HSAP0406S00021374	0.0002952	0.0071702	1.00632	NM_001005188	OR6X1		THBS4
812	HSAP0406S00011088	0.0004035	0.0084677	1.0058	AF174603	FBX23		THRAP5
813	HSAP0406S00029184	0.0003361	0.0077255	1.0053	AJ633621	KRTHA3A		TK2
814	HSAP0406S00017265	0.0003648	0.0080358	1.00401	NM_012363	OR1N1		TK25
815	HSAP0406S00026478	4.08e-05	0.0021144	1.00158	AK124283	N/A		TM4SF2
816	HSAP0406S00024329	0.0004746	0.0092321	1.0013	BC034423	N/A		TMEM30A
817	HSAP0406S00005757	0.0002995	0.0072413	1.00084	NM_173076	ABCA12		TMEM5
818	HSAP0406S00005988	0.0001463	0.0048088	1.00061	AK027163	N/A		TMP21
819	HSAP0406S00024554	0.0002281	0.0061891	1.00005	BX161411	N/A		TMSNB
820	HSAP0406S00018554	0.00015	0.0049042	1	AF349445	N/A		TNFRSF10B
821	HSAP0406S00011828	0.0002235	0.0061229	-1.00162	U31903	creb-rp		TNNI1
822	HSAP0406S00028922	5.3e-05	0.0024941	-1.00181	BC060781	N/A		TNP1
823	HSAP0406S00011457	9.94e-05	0.0037221	-1.00225	NM_030939	C6orf62		TPCN1
824	HSAP0406S00002616	0.0004524	0.008967	-1.00548	AK094968	N/A		tpcr27
825	HSAP0406S00016221	0.0001762	0.0053612	-1.0081	AK128723	N/A		TRAM1
826	HSAP0406S00009474	0.0004874	0.0093343	-1.00881	NM_152681	FLJ38482		TRIB2
827	HSAP0406S00031335	0.0003449	0.0078206	-1.00923	NM_144693	ZNF558		TRIM16
828	HSAP0406S00030953	0.000509	0.0095697	-1.01396	AK127759	N/A		TRIM22
829	HSAP0406S00024471	6.02e-05	0.0026952	-1.01416	NM_198794	MAP4K5		TRIM31
830	HSAP0406S00030914	1.1e-06	0.0001448	-1.01614	AF106934	DRIP92		TRIM4
831	HSAP0406S00001231	0.0001585	0.0050324	-1.01652	AF087865	N/A		TRIM51
832	HSAP0406S00011835	6.51e-05	0.0028354	-1.01866	AF218034	N/A		TRO
833	HSAP0406S00011836	3.74e-05	0.0020084	-1.01906	AF007145	N/A		TRPM3
834	HSAP0406S00015580	0.000445	0.0088748	-1.02238	NM_014294	TRAM1		TRPV5
835	HSAP0406S00002436	1.24e-05	0.0008872	-1.02265	AF070550	N/A		TSLP
836	HSAP0406S00005542	1.31e-05	0.0009265	-1.02469	NM_016467	ORMDL1		TUBAL3
837	HSAP0406S00022753	0.0003802	0.0082166	-1.02661	NM_015336	ZDHHC17		TXNDC
838	HSAP0406S00019574	1.72e-05	0.0011399	-1.02826	AB051546	KIAA1759		TYP1
839	HSAP0406S00004825	0.0004921	0.0093843	-1.02975	AK000380	N/A		UBD
840	HSAP0406S00000168	0.0001971	0.0056474	-1.0327	AB033011	KIAA1185		UBE2C
841	HSAP0406S00015736	7.15e-05	0.0030109	-1.03285	AF132946	N/A		UGCG
842	HSAP0406S00030888	1.6e-06	0.0001933	-1.03376	NM_005035	POLRMT		UGT8
843	HSAP0406S00019598	6.3e-06	0.0005501	-1.03467	NM_000391	CLN2		UMP-CMPK
844	HSAP0406S00015308	6.5e-05	0.0028344	-1.0356	BC012022	PPP2CB		UNQ2754
845	HSAP0406S00005921	2.08e-05	0.0013012	-1.03694	BC032144	ACSL3		UNQ3112
846	HSAP0406S00012304	0.0004175	0.0086086	-1.03772	NM_033481	FBXO9		UNQ5830
847	HSAP0406S00005819	7.7e-06	0.0006333	-1.04124	NM_021198	CTDSP1		UNQ9373
848	HSAP0406S00002077	7e-05	0.0029698	-1.04145	AK000726	N/A		UQCR
849	HSAP0406S00005821	2.32e-05	0.0013945	-1.04213	AF258582	N/A		VDR
850	HSAP0406S00011882	0.0005098	0.0095738	-1.04241	NM_000544	TAP2		VN1R4
851	HSAP0406S00001555	0.0002893	0.0071018	-1.04356	BC024007	CTBS		VPS13C
852	HSAP0406S00030943	8.43e-05	0.0033472	-1.0445	AK128423	N/A		WDR18
853	HSAP0406S00033146	0.0002637	0.0067711	-1.04587	NM_153219	ZNF524		WFDC10A
854	HSAP0406S00031963	1.4e-06	0.0001779	-1.04639	AB006572	RMP		WFDC10B
855	HSAP0406S00004823	0.0003463	0.0078424	-1.04723	NM_145686	MAP4K4		WFDC9
856	HSAP0406S00018925	0.0001108	0.0040144	-1.04773	NM_012215	MGEA5		WISP3
857	HSAP0406S00008088	0.0003625	0.0080245	-1.04956	NM_015303	KIAA0804		WNT16
858	HSAP0406S00030167	0.0002827	0.007024	-1.04976	AK025914	N/A		ZCWCC3
859	HSAP0406S00025628	8e-07	0.0001129	-1.04978	NM_022473	SH3BP3		ZDHHC17
860	HSAP0406S00037021	1.8e-06	0.0002146	-1.05221	BC004366	MGC10334		ZMYND11
861	HSAP0406S00034383	0.0003741	0.0081133	-1.05368	NM_145858	CRYZL1		ZNF333
862	HSAP0406S00012755	0.0003452	0.0078226	-1.05392	AK094706	N/A		ZNF524
863	HSAP0406S00035880	0.0001234	0.0043017	-1.05681	NM_203473	PORCN		ZNF558
864	HSAP0406S00023176	0.0001087	0.0039617	-1.05811	NM_016281	TAOK3
865	HSAP0406S00003861	0.0001814	0.005421	-1.05945	NM_134421	HPCAL1
866	HSAP0406S00022631	0.0002312	0.0062327	-1.05965	NM_014254	TMEM5
867	HSAP0406S00000169	4.6e-05	0.0022874	-1.06087	NM_020710	KIAA1185
868	HSAP0406S00011523	0.0003163	0.0074829	-1.06257	BC067086	N/A
869	HSAP0406S00022412	0.0004552	0.0089983	-1.06257	M58285	N/A
870	HSAP0406S00031655	0.0001	0.0037257	-1.06293	AK122587	FLJ00412
871	HSAP0406S00036592	0.0003083	0.0073862	-1.06404	AK022463	N/A
872	HSAP0406S00028923	0.00025	0.0065751	-1.06546	BC041114	ARHT1
873	HSAP0406S00004124	0.000348	0.0078619	-1.06872	BC001248	FLJ20272
874	HSAP0406S00022608	2e-07	3.54e-05	-1.0694	U81556	N/A
875	HSAP0406S00030928	< 1e-07	< 1e-07	-1.06942	D86976	KIAA0223
876	HSAP0406S00004532	1.6e-06	0.0001933	-1.07015	NM_022492	FLJ12788
877	HSAP0406S00016234	0.00032	0.0075126	-1.07029	BC009573	LOC55871
878	HSAP0406S00015579	0.0001863	0.0054917	-1.07095	AF130055	N/A
879	HSAP0406S00030931	1e-07	1.93e-05	-1.07214	BC048129	HA-1
880	HSAP0406S00019678	0.0004402	0.0088505	-1.07363	BC053867	SBF2
881	HSAP0406S00012303	0.0003199	0.0075126	-1.07821	NM_012347	FBXO9
882	HSAP0406S00005117	0.0001203	0.0042413	-1.07887	NM_058241	CCNT2
883	HSAP0406S00020457	0.0002821	0.0070188	-1.07971	NM_013306	SNX15
884	HSAP0406S00036863	1.67e-05	0.0011127	-1.08024	NM_002414	CD99
885	HSAP0406S00013573	0.0003147	0.0074594	-1.08033	AK025966	N/A
886	HSAP0406S00008090	0.0004766	0.0092321	-1.08326	AB018347	KIAA0804
887	HSAP0406S00011837	1.84e-05	0.0011915	-1.08554	NM_006411	AGPAT1
888	HSAP0406S00005725	0.0001598	0.005053	-1.0866	NM_015040	PIP5K3
889	HSAP0406S00031073	5.63e-05	0.0025931	-1.08665	AK129956	N/A
890	HSAP0406S00030164	0.0001844	0.0054751	-1.08716	AK074030	FLJ00039
891	HSAP0406S00019328	9e-06	0.0007116	-1.08819	AY358342	N/A
892	HSAP0406S00004789	9.13e-05	0.003519	-1.08833	BC047722	N/A
893	HSAP0406S00021214	5.9e-05	0.002674	-1.08941	AK075137	N/A
894	HSAP0406S00016131	2.1e-06	0.0002426	-1.08973	AL157437	DKFZp434E1512
895	HSAP0406S00011520	0.0001685	0.005213	-1.09088	NM_007047	BTN3A2
896	HSAP0406S00029584	0.0002025	0.005744	-1.09327	AF069250	OA48-18
897	HSAP0406S00004125	0.0003643	0.0080358	-1.0978	AK000279	N/A
898	HSAP0406S00034668	1.48e-05	0.0010231	-1.10158	BC046176	C21orf106
899	HSAP0406S00008605	0.0003261	0.0075881	-1.10277	NM_006859	LIAS
900	HSAP0406S00023575	0.0001273	0.0044002	-1.10397	AF265440	N/A
901	HSAP0406S00035549	0.0001578	0.0050255	-1.10585	AK074528	N/A
902	HSAP0406S00036142	0.0001129	0.0040781	-1.10783	AL050366	DKFZp564A126
903	HSAP0406S00023876	4.21e-05	0.0021558	-1.10824	AB020723	KIAA0916
904	HSAP0406S00025890	0.0003644	0.0080358	-1.10966	AJ608771	VPS13C
905	HSAP0406S00023304	4.65e-05	0.0023029	-1.11131	NM_003677	DENR
906	HSAP0406S00031619	0.0003129	0.0074431	-1.11331	NM_032433	ZNF333
907	HSAP0406S00036841	8.25e-05	0.0033055	-1.11537	AK074528	N/A
908	HSAP0406S00021213	5.96e-05	0.0026847	-1.11562	AY358442	N/A
909	HSAP0406S00015737	1.5e-05	0.0010312	-1.11753	NM_015942	CGI-12
910	HSAP0406S00016130	8e-07	0.0001129	-1.11797	NM_003801	GPAA1
911	HSAP0406S00018926	4.68e-05	0.0023085	-1.11974	AB014579	KIAA0679
912	HSAP0406S00027722	1.8e-05	0.0011739	-1.12082	NM_024939	FLJ21918
913	HSAP0406S00011522	0.0003977	0.0084026	-1.12366	U90143	BT3.3
914	HSAP0406S00030872	0.0004273	0.008698	-1.12533	NM_017550	KIAA1193
915	HSAP0406S00023874	4.81e-05	0.0023444	-1.12558	AF083244	N/A
916	HSAP0406S00033442	0.0002549	0.0066518	-1.12675	NM_020746	KIAA1271
917	HSAP0406S00008734	0.0002834	0.0070344	-1.12978	U22680	N/A
918	HSAP0406S00019197	0.0003095	0.0073957	-1.13099	AL834458	DKFZp547J236
919	HSAP0406S00004147	0.0001538	0.0049668	-1.1313	AB037835	KIAA1414
920	HSAP0406S00021215	6.89e-05	0.0029418	-1.13201	AK075471	N/A
921	HSAP0406S00029238	5.83e-05	0.0026521	-1.13618	NM_021078	GCN5L2
922	HSAP0406S00004146	0.0003171	0.0074851	-1.13828	AK001513	N/A
923	HSAP0406S00035261	6.09e-05	0.0027069	-1.1425	BC002587	FLJ20232
924	HSAP0406S00030913	6e-07	9.14e-05	-1.14305	BC007853	THRAP5
925	HSAP0406S00002438	5.7e-06	0.0005073	-1.14339	NM_006589	C1orf2
926	HSAP0406S00003862	6.26e-05	0.0027591	-1.14369	AF070616	N/A
927	HSAP0406S00016933	0.0004129	0.0085617	-1.14597	NM_032558	FLJ14753
928	HSAP0406S00004148	0.00014	0.0046675	-1.14687	BX538008	DKFZp686B2046
929	HSAP0406S00030087	6.07e-05	0.0027012	-1.14707	BC018346	EVER1
930	HSAP0406S00036431	0.0004272	0.008698	-1.1499	AK125641	N/A
931	HSAP0406S00009052	0.0002158	0.0059697	-1.15396	NM_021159	RAP1GDS1
932	HSAP0406S00018779	0.0004039	0.0084677	-1.15826	BC020959	SMBP
933	HSAP0406S00012301	0.0003524	0.0079192	-1.15832	NM_033480	FBXO9
934	HSAP0406S00009736	9.11e-05	0.0035149	-1.15864	NM_005885	MARCH-VI
935	HSAP0406S00035571	1.03e-05	0.0007809	-1.15941	NM_002414	CD99
936	HSAP0406S00022609	< 1e-07	< 1e-07	-1.16082	NM_005730	CTDSP2
937	HSAP0406S00017749	0.0004798	0.0092445	-1.16186	AK093587	N/A
938	HSAP0406S00015953	6.14e-05	0.0027225	-1.16496	D63477	KIAA0143
939	HSAP0406S00006927	0.0003729	0.0080968	-1.1666	NM_144641	FLJ32332
940	HSAP0406S00035262	3.23e-05	0.0018115	-1.16662	AL834205	DKFZp434E0130
941	HSAP0406S00030978	0.0001784	0.0053837	-1.16704	NM_006830	UQCR
942	HSAP0406S00023879	2.43e-05	0.0014465	-1.16826	NM_015057	MYCBP2
943	HSAP0406S00034303	0.0003319	0.0076553	-1.16846	AF269162	N/A
944	HSAP0406S00030089	3.39e-05	0.0018755	-1.17151	NM_007267	EVER1
945	HSAP0406S00030929	< 1e-07	< 1e-07	-1.17222	NM_012292	HA-1
946	HSAP0406S00014186	0.0004071	0.0084923	-1.17281	NM_033017	TRIM4
947	HSAP0406S00006879	4.9e-06	0.0004514	-1.17833	NM_004635	MAPKAPK3
948	HSAP0406S00013575	0.0001175	0.0041862	-1.1833	NM_022373	FLJ22313
949	HSAP0406S00008089	0.0001517	0.0049292	-1.18347	AL833838	DKFZp761L03121
950	HSAP0406S00036731	0.0002034	0.0057547	-1.18626	BC025358	ABCD1
951	HSAP0406S00025626	7e-07	0.0001032	-1.19268	AL833301	DKFZp451K069
952	HSAP0406S00004941	0.0002408	0.0063813	-1.19277	BC035307	PSD4
953	HSAP0406S00016934	0.0003043	0.0073285	-1.20037	AF255650	N/A
954	HSAP0406S00028076	1.36e-05	0.0009527	-1.20215	AK097851	N/A
955	HSAP0406S00004602	3.9e-05	0.0020588	-1.20555	BC050466	FLJ90024
956	HSAP0406S00036432	0.0002557	0.0066548	-1.20778	AK056684	N/A
957	HSAP0406S00019685	0.0003686	0.0080556	-1.20841	NM_016422	RNF141
958	HSAP0406S00025621	8e-07	0.0001129	-1.20948	AL832367	DKFZp451A177
959	HSAP0406S00019677	0.0001423	0.0047152	-1.2109	BC043389	SBF2
960	HSAP0406S00009341	3.65e-05	0.0019691	-1.21174	NM_002940	ABCE1
961	HSAP0406S00018019	< 1e-07	< 1e-07	-1.21191	BX640774	DKFZp686E10210
962	HSAP0406S00022663	1.85e-05	0.0011959	-1.21288	NM_016056	CGI-119
963	HSAP0406S00004945	0.0003796	0.0082084	-1.21746	NM_172003	CBWD2
964	HSAP0406S00034648	0.0002757	0.0069438	-1.21819	AK128839	N/A
965	HSAP0406S00030166	0.000207	0.0058047	-1.22233	AK025676	N/A
966	HSAP0406S00027477	1.16e-05	0.0008481	-1.22616	NM_005611	RBL2
967	HSAP0406S00011521	4.27e-05	0.0021672	-1.22616	BC002832	BTN3A2
968	HSAP0406S00023878	6.26e-05	0.0027591	-1.22657	AK000968	N/A
969	HSAP0406S00010283	0.0001403	0.0046699	-1.22683	NM_032042	DKFZP564D172
970	HSAP0406S00022016	0.0004268	0.008698	-1.22808	NM_018169	FLJ10652
971	HSAP0406S00034646	0.0003888	0.008305	-1.22819	AK098352	N/A
972	HSAP0406S00036401	0.0003262	0.0075881	-1.22935	NM_024810	CXorf45
973	HSAP0406S00030919	2.86e-05	0.0016544	-1.23095	NM_024100	WDR18
974	HSAP0406S00030930	< 1e-07	< 1e-07	-1.24113	BC035564	N/A
975	HSAP0406S00004601	3.14e-05	0.00178	-1.24123	NM_153342	FLJ90024
976	HSAP0406S00019738	7.2e-06	0.0006057	-1.24241	NM_024514	CYP2R1
977	HSAP0406S00023877	0.0001626	0.0050868	-1.24243	AL110277	DKFZp586G0322
978	HSAP0406S00005567	0.0004025	0.0084555	-1.24244	AK074996	N/A
979	HSAP0406S00029394	0.0002518	0.0065989	-1.24407	BC041143	ACBD4
980	HSAP0406S00034416	6.4e-06	0.0005562	-1.24474	D50926	KIAA0136
981	HSAP0406S00002437	1.1e-06	0.0001448	-1.24575	BC040136	C1orf2
982	HSAP0406S00015912	0.0003211	0.0075169	-1.24839	BC017881	N/A
983	HSAP0406S00034169	7.96e-05	0.0032373	-1.25263	NM_022082	C20orf59
984	HSAP0406S00010543	7.96e-05	0.0032373	-1.25467	NM_152409	FLJ37562
985	HSAP0406S00018777	0.0001457	0.004802	-1.25503	AK027438	N/A
986	HSAP0406S00022109	0.0003589	0.0080025	-1.25555	BT009771	N/A
987	HSAP0406S00034375	7.21e-05	0.0030258	-1.25579	NM_006134	C21orf4
988	HSAP0406S00004228	5.98e-05	0.0026871	-1.25619	NM_177968	PPM1B
989	HSAP0406S00010075	0.0005409	0.0099703	-1.2577	BC003411	N/A
990	HSAP0406S00014945	0.0003771	0.0081687	-1.25821	NM_020728	KIAA1228
991	HSAP0406S00000671	0.0001581	0.0050295	-1.25867	NM_000437	PAFAH2
992	HSAP0406S00022088	0.0002215	0.0060817	-1.26066	BC029379	SLC38A2
993	HSAP0406S00016115	0.0003484	0.0078649	-1.26356	BC014229	PARP10
994	HSAP0406S00014944	0.0003195	0.0075126	-1.26535	AB033054	KIAA1228
995	HSAP0406S00029406	0.0003093	0.0073957	-1.26653	BC029634	ARHGAP27
996	HSAP0406S00008522	3.35e-05	0.0018618	-1.26727	NM_145048	MGC29898
997	HSAP0406S00008933	7.3e-06	0.0006127	-1.26923	D89678	N/A
998	HSAP0406S00023151	0.0003366	0.0077275	-1.2701	AB028948	KIAA1025
999	HSAP0406S00002435	3e-07	5.05e-05	-1.27179	BC006297	N/A
1000	HSAP0406S00017748	0.0004215	0.0086572	-1.27381	NM_207511	FLJ36268
1001	HSAP0406S00031612	0.0004853	0.0093192	-1.27441	NM_005716	RGS19IP1
1002	HSAP0406S00022722	2.9e-06	0.0003044	-1.27519	NM_144982	MGC23401
1003	HSAP0406S00034417	1.09e-05	0.0008114	-1.27688	NM_015358	ZCWCC3
1004	HSAP0406S00025622	6.26e-05	0.0027591	-1.28119	AL831983	DKFZp451F203
1005	HSAP0406S00031674	0.0003246	0.00757	-1.28156	NM_032855	HSH2D
1006	HSAP0406S00018780	0.0001187	0.0042015	-1.28213	AY358819	N/A
1007	HSAP0406S00034649	0.0001621	0.0050833	-1.28241	AK092334	N/A
1008	HSAP0406S00004390	6.73e-05	0.0029013	-1.28442	NM_004161	RAB1A
1009	HSAP0406S00023148	0.0003961	0.0083976	-1.28587	AK023837	N/A
1010	HSAP0406S00019178	2.8e-06	0.0002965	-1.28693	NM_212554	LOC399818
1011	HSAP0406S00018651	8.1e-06	0.0006603	-1.28735	NM_000235	LIPA
1012	HSAP0406S00015531	3.3e-05	0.0018424	-1.28966	NM_002603	PDE7A
1013	HSAP0406S00020816	0.0002114	0.0058833	-1.29044	BC003636	ARRB1
1014	HSAP0406S00022721	1.11e-05	0.0008196	-1.29241	AK125035	N/A
1015	HSAP0406S00023150	0.0003491	0.0078649	-1.29348	AL133033	DKFZp586E041
1016	HSAP0406S00022752	0.0001141	0.0041057	-1.29489	NM_020841	OSBPL8
1017	HSAP0406S00003875	5.83e-05	0.0026521	-1.29519	NM_152391	C2orf22
1018	HSAP0406S00022242	0.0004758	0.0092321	-1.2952	AF113007	N/A
1019	HSAP0406S00034418	5.6e-06	0.0005008	-1.30189	BC042609	ZCWCC3
1020	HSAP0406S00021822	0.000415	0.0085942	-1.30342	NM_001987	ETV6
1021	HSAP0406S00003009	0.000354	0.0079342	-1.30694	NM_017673	C1orf26
1022	HSAP0406S00024825	0.0002084	0.0058262	-1.30882	NM_006827	TMP21
1023	HSAP0406S00031964	1.73e-05	0.0011424	-1.3093	AF091095	C19orf2
1024	HSAP0406S00022966	0.0001575	0.0050202	-1.31099	AK001728	N/A
1025	HSAP0406S00036604	5.07e-05	0.002423	-1.31594	NM_004840	ARHGEF6
1026	HSAP0406S00022749	0.0001029	0.0038143	-1.31633	AF173895	MST120
1027	HSAP0406S00034664	1.6e-06	0.0001933	-1.31664	NM_015151	C21orf106
1028	HSAP0406S00036603	4.44e-05	0.0022289	-1.31738	BC043505	ARHGEF6
1029	HSAP0406S00021290	0.0004273	0.008698	-1.3183	AK122650	N/A
1030	HSAP0406S00036557	0.0001776	0.0053837	-1.32123	NM_000194	HPRT1
1031	HSAP0406S00001230	6e-06	0.0005289	-1.323	NM_016308	UMP-CMPK
1032	HSAP0406S00009054	1.59e-05	0.001075	-1.32344	AF215923	N/A
1033	HSAP0406S00011834	4.31e-05	0.0021785	-1.32675	BC006818	AGPAT1
1034	HSAP0406S00010223	0.0001312	0.0044638	-1.32756	NM_178276	C5orf12
1035	HSAP0406S00018989	1.35e-05	0.0009493	-1.33133	NM_024928	OBFC1
1036	HSAP0406S00014138	0.0001227	0.0042936	-1.33149	NM_015395	DKFZP434B0335
1037	HSAP0406S00028909	4e-06	0.0003858	-1.33187	NM_001003927	EVI2A
1038	HSAP0406S00008937	2.4e-06	0.0002696	-1.33237	NM_005463	HNRPDL
1039	HSAP0406S00022517	0.0003066	0.0073646	-1.33274	NM_005419	STAT2
1040	HSAP0406S00023245	6.82e-05	0.0029255	-1.33475	BC000318	CAMKK2
1041	HSAP0406S00036602	3.85e-05	0.0020471	-1.33547	BC033768	N/A
1042	HSAP0406S00004486	< 1e-07	< 1e-07	-1.33705	NM_006062	SMYD5
1043	HSAP0406S00012625	3.13e-05	0.0017771	-1.33879	NM_006016	CD164
1044	HSAP0406S00029320	0.0004788	0.0092445	-1.33884	BC008286	DUSP3
1045	HSAP0406S00010074	0.0001597	0.005053	-1.33884	AF212235	N/A
1046	HSAP0406S00030974	2e-07	3.54e-05	-1.33908	BC018784	N/A
1047	HSAP0406S00022964	0.0003827	0.0082416	-1.34417	AB028956	KIAA1033
1048	HSAP0406S00036840	0.0004263	0.008698	-1.34454	AK097346	N/A
1049	HSAP0406S00016053	0.0002447	0.006468	-1.34667	AY129020	N/A
1050	HSAP0406S00018016	< 1e-07	< 1e-07	-1.34705	NM_004641	MLLT10
1051	HSAP0406S00023247	5.5e-06	0.0004955	-1.35289	NM_006549	CAMKK2
1052	HSAP0406S00033441	0.0002665	0.0068193	-1.35695	AB033097	KIAA1271
1053	HSAP0406S00025221	8.64e-05	0.003394	-1.35772	NM_032714	C14orf151
1054	HSAP0406S00005585	4.8e-06	0.0004455	-1.35816	AL133087	DKFZp434D2328
1055	HSAP0406S00036804	0.0004215	0.0086572	-1.36286	NM_080612	GAB3
1056	HSAP0406S00024488	0.0002059	0.0057959	-1.36669	NM_030755	TXNDC
1057	HSAP0406S00031965	2e-06	0.0002339	-1.36723	BC014933	C19orf2
1058	HSAP0406S00031961	6.9e-06	0.0005899	-1.36853	NM_003796	C19orf2
1059	HSAP0406S00034170	2.28e-05	0.001384	-1.37029	BC027447	N/A
1060	HSAP0406S00030975	< 1e-07	< 1e-07	-1.37488	BC032443	MBD3
1061	HSAP0406S00018658	4.4e-06	0.0004168	-1.37541	AK125193	N/A
1062	HSAP0406S00023520	4.94e-05	0.0023856	-1.37617	AB018273	KIAA0730
1063	HSAP0406S00023244	2.8e-06	0.0002965	-1.37805	AL834322	DKFZp761L24121
1064	HSAP0406S00031962	5.4e-06	0.0004889	-1.37969	BC067259	C19orf2
1065	HSAP0406S00019024	8.24e-05	0.0033055	-1.37996	NM_145341	PDCD4
1066	HSAP0406S00018127	1.1e-05	0.0008155	-1.38253	BX537407	DKFZp686D0452
1067	HSAP0406S00019429	0.0003206	0.0075146	-1.38367	NM_002339	LSP1
1068	HSAP0406S00027478	6e-07	9.14e-05	-1.38418	BX537767	DKFZp781K2028
1069	HSAP0406S00023248	6.7e-06	0.0005755	-1.38494	AB018330	KIAA0787
1070	HSAP0406S00025624	2.29e-05	0.0013855	-1.3856	AL832455	DKFZp451K071
1071	HSAP0406S00005565	5.05e-05	0.0024197	-1.38567	AB033091	KIAA1265
1072	HSAP0406S00006372	4.6e-05	0.0022874	-1.38811	AY367056	N/A
1073	HSAP0406S00022516	0.0001546	0.0049772	-1.38856	BX640607	DKFZp686H05229
1074	HSAP0406S00015532	0.0002589	0.0066945	-1.38981	AY266364	PDE7
1075	HSAP0406S00031150	7.48e-05	0.0031073	-1.39036	NM_152362	MGC17791
1076	HSAP0406S00025620	2.34e-05	0.001402	-1.39199	AK024726	N/A
1077	HSAP0406S00034171	0.0002254	0.0061348	-1.39256	AK027065	N/A
1078	HSAP0406S00028733	0.0001658	0.0051555	-1.39277	BC033618	N/A
1079	HSAP0406S00030457	0.0004813	0.0092608	-1.39393	AF130101	N/A
1080	HSAP0406S00002370	0.0004893	0.009361	-1.39622	BC063858	ATP8B2
1081	HSAP0406S00036562	0.0003556	0.0079604	-1.40244	AK124940	N/A
1082	HSAP0406S00012751	1.65e-05	0.0011034	-1.4071	NM_181782	NCOA7
1083	HSAP0406S00028253	7.99e-05	0.0032459	-1.40769	NM_015085	GARNL4
1084	HSAP0406S00024487	0.0001662	0.0051592	-1.40793	BC056874	TXNDC
1085	HSAP0406S00031072	0.0003147	0.0074594	-1.40989	NM_005597	NFIC
1086	HSAP0406S00018126	4.8e-06	0.0004455	-1.41034	NM_002211	ITGB1
1087	HSAP0406S00012753	1.76e-05	0.001156	-1.41265	BC033612	NCOA7
1088	HSAP0406S00030976	1e-07	1.93e-05	-1.41395	BC009438	MBD3
1089	HSAP0406S00006259	0.000311	0.0074123	-1.41446	NM_016819	OGG1
1090	HSAP0406S00018776	3.86e-05	0.0020494	-1.41792	AK075451	N/A
1091	HSAP0406S00004485	< 1e-07	< 1e-07	-1.41858	U50383	NN8-4AG
1092	HSAP0406S00023522	0.0001898	0.0055446	-1.41944	NM_014363	SACS
1093	HSAP0406S00025629	8.53e-05	0.0033688	-1.41997	NM_003825	SNAP23
1094	HSAP0406S00014059	9.9e-06	0.0007584	-1.42101	U90268	Krit1
1095	HSAP0406S00018782	3.38e-05	0.0018728	-1.42643	NM_020123	SMBP
1096	HSAP0406S00035409	2.9e-06	0.0003044	-1.42937	BC034406	PARVG
1097	HSAP0406S00016119	9.03e-05	0.003495	-1.44162	NM_032789	PARP10
1098	HSAP0406S00026632	0.0002244	0.0061321	-1.44174	NM_001287	CLCN7
1099	HSAP0406S00022662	3.6e-05	0.0019565	-1.44205	AF182414	MDS013
1100	HSAP0406S00030977	1e-07	1.93e-05	-1.44366	NM_003926	MBD3
1101	HSAP0406S00026631	0.0002768	0.0069572	-1.44846	BC006158	CLCN7
1102	HSAP0406S00028256	5.3e-05	0.0024941	-1.44871	AK127021	N/A
1103	HSAP0406S00026630	0.0002303	0.0062213	-1.4537	BC004946	N/A
1104	HSAP0406S00012665	0.0005286	0.0098123	-1.46293	BC035823	N/A
1105	HSAP0406S00017827	5.43e-05	0.0025359	-1.46559	NM_006624	ZMYND11
1106	HSAP0406S00025625	9.3e-06	0.0007276	-1.46975	AL832352	DKFZp451C216
1107	HSAP0406S00023012	3.5e-06	0.0003533	-1.47045	AB037719	KIAA1298
1108	HSAP0406S00006374	8.35e-05	0.0033262	-1.47068	AB002377	KIAA0379
1109	HSAP0406S00016117	3.87e-05	0.0020518	-1.47572	BC019030	PARP10
1110	HSAP0406S00036141	2.6e-06	0.0002851	-1.47858	AF223393	N/A
1111	HSAP0406S00017895	1.3e-06	0.0001669	-1.47946	NM_032905	RBM17
1112	HSAP0406S00014832	0.0001977	0.0056602	-1.48074	NM_015660	HIMAP2
1113	HSAP0406S00018778	1.55e-05	0.0010537	-1.48576	AK074824	N/A
1114	HSAP0406S00027872	6.69e-05	0.0028933	-1.48876	NM_152649	FLJ34389
1115	HSAP0406S00024470	3.52e-05	0.0019301	-1.49321	Z25426	N/A
1116	HSAP0406S00036732	4.87e-05	0.0023673	-1.49959	AY421736	ALD
1117	HSAP0406S00028908	3.9e-06	0.0003792	-1.49997	BC035572	EVI2A
1118	HSAP0406S00012417	7.2e-06	0.0006057	-1.50283	NM_018247	TMEM30A
1119	HSAP0406S00025889	0.0001774	0.0053837	-1.50355	AK128650	N/A
1120	HSAP0406S00013127	< 1e-07	< 1e-07	-1.50569	AJ419866	RNASE6PL
1121	HSAP0406S00031764	8.73e-05	0.0034148	-1.50719	NM_005535	IL12RB1
1122	HSAP0406S00000709	2.09e-05	0.0013053	-1.51508	NM_017837	FLJ20477
1123	HSAP0406S00036563	0.0001291	0.0044409	-1.51767	NM_145284	LOC159090
1124	HSAP0406S00025623	2.8e-06	0.0002965	-1.51825	AL832014	DKFZp451E204
1125	HSAP0406S00016238	4e-05	0.0020906	-1.51912	AK090429	FLJ00346
1126	HSAP0406S00031726	0.0001811	0.005421	-1.52577	NM_198580	SLC27A1
1127	HSAP0406S00009941	0.0002623	0.0067591	-1.5291	NM_024615	PARP8
1128	HSAP0406S00022921	0.0004765	0.0092321	-1.53297	AB033034	KIAA1208
1129	HSAP0406S00007719	5.46e-05	0.0025402	-1.53326	NM_006506	RASA2
1130	HSAP0406S00016116	1.41e-05	0.0009784	-1.5382	AK075250	N/A
1131	HSAP0406S00031071	5.93e-05	0.0026777	-1.54197	NM_205843	NFIC
1132	HSAP0406S00030094	0.0003966	0.0084016	-1.55067	AK097987	N/A
1133	HSAP0406S00028255	4.49e-05	0.0022418	-1.55138	AB028962	KIAA1039
1134	HSAP0406S00034672	9e-07	0.0001247	-1.554	AF059319	N/A
1135	HSAP0406S00022920	0.0004521	0.008967	-1.56006	BC042615	N/A
1136	HSAP0406S00009942	0.0002128	0.0059133	-1.56432	AK024961	N/A
1137	HSAP0406S00009485	0.0005024	0.0094982	-1.56763	BX648655	DKFZp686E11248
1138	HSAP0406S00016237	2.03e-05	0.0012764	-1.56977	NM_203447	DOCK8
1139	HSAP0406S00033984	0.0001944	0.0056105	-1.56985	NM_020820	PREX1
1140	HSAP0406S00012799	6.88e-05	0.0029409	-1.57268	NM_003569	STX7
1141	HSAP0406S00034628	6e-05	0.0026928	-1.57386	NM_194255	SLC19A1
1142	HSAP0406S00027311	0.0002386	0.0063341	-1.57882	AK123224	N/A
1143	HSAP0406S00018694	3.42e-05	0.0018893	-1.58144	NM_002729	HHEX
1144	HSAP0406S00031728	0.0001778	0.0053837	-1.59007	AK131101	FLJ00336
1145	HSAP0406S00022919	0.0003374	0.0077349	-1.60109	AL359588	DKFZp762B226
1146	HSAP0406S00034168	5.41e-05	0.0025297	-1.60384	AK074107	FLJ00178
1147	HSAP0406S00014688	< 1e-07	< 1e-07	-1.60409	AF116707	N/A
1148	HSAP0406S00009484	0.0002479	0.0065386	-1.60825	AK000042	N/A
1149	HSAP0406S00034626	3.94e-05	0.0020681	-1.61183	NM_003056	SLC19A1
1150	HSAP0406S00030893	< 1e-07	< 1e-07	-1.61306	BC005839	FSTL3
1151	HSAP0406S00009482	0.0003685	0.0080556	-1.61509	AK026333	N/A
1152	HSAP0406S00021952	6.2e-06	0.0005439	-1.61663	AL117608	DKFZp564O1863
1153	HSAP0406S00030573	3.3e-06	0.0003359	-1.61737	NM_020474	GALNT1
1154	HSAP0406S00000930	2.94e-05	0.00169	-1.62689	AB018740	N/A
1155	HSAP0406S00030946	2.4e-06	0.0002696	-1.63374	U20897	MUM-1
1156	HSAP0406S00005586	6.5e-06	0.0005635	-1.63551	BC050586	N/A
1157	HSAP0406S00034574	0.0005191	0.0096798	-1.63654	AB017549	EREG1
1158	HSAP0406S00015210	0.0003064	0.0073646	-1.6372	NM_003842	TNFRSF10B
1159	HSAP0406S00033983	5.94e-05	0.002679	-1.63753	AB037836	KIAA1415
1160	HSAP0406S00035193	0.0001099	0.0039936	-1.64357	AK123190	N/A
1161	HSAP0406S00006141	0.0001643	0.0051175	-1.65384	BC067258	RNPEPL1
1162	HSAP0406S00004991	4.18e-05	0.0021511	-1.65399	AK127675	N/A
1163	HSAP0406S00008960	4.75e-05	0.0023182	-1.66611	BC012205	PLAC8
1164	HSAP0406S00027613	9.8e-06	0.0007539	-1.66802	Y10498	mt-TK
1165	HSAP0406S00023129	7.36e-05	0.0030643	-1.6774	NM_017901	TPCN1
1166	HSAP0406S00036140	3e-07	5.05e-05	-1.67791	NM_003605	OGT
1167	HSAP0406S00019177	1e-07	1.93e-05	-1.67967	AF318345	pp14737
1168	HSAP0406S00026141	1.88e-05	0.0012111	-1.68177	BC011905	DKFZP434H132
1169	HSAP0406S00007879	7.4e-06	0.0006169	-1.69601	AB014732	smap-4
1170	HSAP0406S00014689	2e-07	3.54e-05	-1.70098	AB032973	KIAA1147
1171	HSAP0406S00026140	1e-05	0.0007629	-1.70743	AL834382	DKFZp762M1316
1172	HSAP0406S00006227	1.1e-05	0.0008155	-1.71077	NM_002222	ITPR1
1173	HSAP0406S00007880	4e-06	0.0003858	-1.71539	AF351617	N/A
1174	HSAP0406S00036733	0.0001013	0.0037665	-1.72328	AY421738	ALD
1175	HSAP0406S00035235	0.0004076	0.0084923	-1.72382	NM_014292	CBX6
1176	HSAP0406S00006142	0.0002177	0.0059952	-1.74615	NM_018226	RNPEPL1
1177	HSAP0406S00027614	7.9e-06	0.0006454	-1.75125	NM_004614	TK2
1178	HSAP0406S00000161	0.0003658	0.0080358	-1.75585	NM_001409	EGFL3
1179	HSAP0406S00018471	4.1e-06	0.0003924	-1.76609	AY358379	N/A
1180	HSAP0406S00014265	1.28e-05	0.0009123	-1.76686	NM_020246	SLC12A9
1181	HSAP0406S00036196	4.11e-05	0.002124	-1.76903	NM_006639	CYSLTR1
1182	HSAP0406S00029911	3.1e-06	0.00032	-1.76991	NM_175738	RAB37
1183	HSAP0406S00014269	9.6e-06	0.0007416	-1.77306	AK024466	FLJ00059
1184	HSAP0406S00007576	0.0005277	0.0098054	-1.77698	BC011848	PLXND1
1185	HSAP0406S00020421	0.0001724	0.0052893	-1.77988	NM_003942	RPS6KA4
1186	HSAP0406S00017540	0.0002882	0.0070843	-1.78219	NM_033387	C9orf59
1187	HSAP0406S00014266	1.49e-05	0.0010262	-1.78485	AK024421	FLJ00010
1188	HSAP0406S00022739	2.13e-05	0.0013213	-1.78736	U16307	GliPR
1189	HSAP0406S00014267	1.53e-05	0.0010421	-1.78916	AK024494	FLJ00100
1190	HSAP0406S00004489	0.0001507	0.0049118	-1.79145	AB075820	KIAA1940
1191	HSAP0406S00017539	0.0004321	0.0087481	-1.80128	BC029924	C9orf59
1192	HSAP0406S00018472	8.2e-06	0.0006655	-1.80913	AK024449	FLJ00041
1193	HSAP0406S00018018	2.3e-06	0.0002616	-1.80926	AY187923	MLL/AF10fusion
1194	HSAP0406S00007578	0.0004419	0.0088541	-1.82009	NM_015103	PLXND1
1195	HSAP0406S00017538	0.0002256	0.0061348	-1.82541	AK024434	FLJ00024
1196	HSAP0406S00007575	0.0004408	0.0088505	-1.83208	BC044228	N/A
1197	HSAP0406S00012231	3.5e-05	0.0019277	-1.83253	NM_003599	SUPT3H
1198	HSAP0406S00003903	4.26e-05	0.0021651	-1.83304	AK025769	N/A
1199	HSAP0406S00014268	7.4e-06	0.0006169	-1.83535	AK024420	FLJ00009
1200	HSAP0406S00011986	0.0001784	0.0053837	-1.84223	BC042605	FKBP5
1201	HSAP0406S00012416	1e-06	0.0001345	-1.84653	AL162046	DKFZp761K1115
1202	HSAP0406S00022260	0.0002619	0.0067591	-1.86008	AK025961	N/A
1203	HSAP0406S00015630	9.47e-05	0.003616	-1.86258	AK095177	N/A
1204	HSAP0406S00022738	2.26e-05	0.0013742	-1.87569	NM_006851	GLIPR1
1205	HSAP0406S00019554	< 1e-07	< 1e-07	-1.88145	BC035582	TRIM22
1206	HSAP0406S00019450	0.0002381	0.0063299	-1.90887	NM_005705	PHEMX
1207	HSAP0406S00030950	5e-07	8.05e-05	-1.91037	BC008098	MUM1
1208	HSAP0406S00030086	3.15e-05	0.0017802	-1.91037	BC007766	EVER1
1209	HSAP0406S00022261	0.000164	0.0051124	-1.92041	NM_007210	GALNT6
1210	HSAP0406S00018470	1.2e-06	0.0001557	-1.92581	AF289594	N/A
1211	HSAP0406S00035511	0.0001542	0.004971	-1.92627	NM_002969	MAPK12
1212	HSAP0406S00007577	0.0001782	0.0053837	-1.93083	BC003526	N/A
1213	HSAP0406S00029915	< 1e-07	< 1e-07	-1.94122	NM_004252	SLC9A3R1
1214	HSAP0406S00027615	3.8e-06	0.0003714	-1.94337	NM_016951	CKLF
1215	HSAP0406S00007050	2e-07	3.54e-05	-1.94464	BX641085	DKFZp686E1669
1216	HSAP0406S00002371	0.0002636	0.0067711	-1.94761	NM_000565	IL6R
1217	HSAP0406S00007573	0.0001962	0.0056304	-1.9491	BC030110	N/A
1218	HSAP0406S00007048	1e-07	1.93e-05	-1.94976	NM_001457	FLNB
1219	HSAP0406S00007439	9.1e-06	0.000718	-1.96838	NM_006810	PDIR
1220	HSAP0406S00000568	0.0003728	0.0080968	-1.97138	M85289	HSPG2
1221	HSAP0406S00035510	0.0002823	0.0070188	-1.97588	BX640648	DKFZp686M02159
1222	HSAP0406S00020618	< 1e-07	< 1e-07	-1.97793	NM_198517	FLJ00332
1223	HSAP0406S00012409	0.0003886	0.008305	-1.97867	BX641095	DKFZp686N23150
1224	HSAP0406S00008745	0.0004855	0.0093192	-1.9876	NM_012108	BRDG1
1225	HSAP0406S00019032	< 1e-07	< 1e-07	-1.9934	NM_203380	ACSL5
1226	HSAP0406S00010706	0.0004795	0.0092445	-1.99456	NM_018923	PCDHGB2
1227	HSAP0406S00019732	8.27e-05	0.0033055	-2.00027	NM_012250	RRAS2
1228	HSAP0406S00027123	< 1e-07	< 1e-07	-2.00067	NM_002738	PRKCB1
1229	HSAP0406S00017124	4.22e-05	0.0021558	-2.00085	BC038711	UGCG
1230	HSAP0406S00010723	0.0002908	0.0071179	-2.00868	AB011160	KIAA0588
1231	HSAP0406S00026137	7e-07	0.0001032	-2.03092	AK128205	N/A
1232	HSAP0406S00028075	< 1e-07	< 1e-07	-2.03559	BC008073	FAM38A
1233	HSAP0406S00028077	< 1e-07	< 1e-07	-2.04218	NM_014745	FAM38A
1234	HSAP0406S00027564	0.00015	0.0049042	-2.05184	NM_018110	DOK4
1235	HSAP0406S00017505	< 1e-07	< 1e-07	-2.05194	NM_015033	FNBP1
1236	HSAP0406S00010704	0.0004154	0.0085942	-2.05268	NM_018922	PCDHGB1
1237	HSAP0406S00001541	0.0002542	0.0066429	-2.06804	NM_006417	IFI44
1238	HSAP0406S00009434	0.0005269	0.0097955	-2.06983	Y15723	sGC
1239	HSAP0406S00014448	2.51e-05	0.0014893	-2.07341	AY196485	N/A
1240	HSAP0406S00018469	2e-07	3.54e-05	-2.08604	AF193048	PP2135
1241	HSAP0406S00008920	4.69e-05	0.0023103	-2.09772	NM_058172	ANTXR2
1242	HSAP0406S00019031	< 1e-07	< 1e-07	-2.0985	NM_016234	ACSL5
1243	HSAP0406S00008073	9.98e-05	0.0037257	-2.10382	AF002816	N/A
1244	HSAP0406S00010710	0.0002835	0.0070344	-2.10739	NM_018919	PCDHGA6
1245	HSAP0406S00010703	0.0002809	0.0070077	-2.11347	NM_018916	PCDHGA3
1246	HSAP0406S00010724	0.0002065	0.0058023	-2.11747	NM_003735	PCDHGA12
1247	HSAP0406S00010729	0.0002173	0.0059914	-2.11993	BC027470	PCDHGC3
1248	HSAP0406S00017747	0.000532	0.0098456	-2.12102	NM_004479	FUT7
1249	HSAP0406S00010709	0.0004084	0.0084923	-2.12359	NM_018924	PCDHGB3
1250	HSAP0406S00016772	3e-06	0.0003123	-2.13236	NM_002072	GNAQ
1251	HSAP0406S00029786	6.07e-05	0.0027012	-2.15333	S66450	PECAM-1,CD31/EndoCAM
1252	HSAP0406S00008376	0.000152	0.0049302	-2.15393	BC007841	N/A
1253	HSAP0406S00010722	0.0002484	0.0065471	-2.15745	NM_018914	PCDHGA11
1254	HSAP0406S00010720	0.0001627	0.0050868	-2.16829	NM_018927	PCDHGB7
1255	HSAP0406S00022241	2.4e-06	0.0002696	-2.18083	AL050159	DKFZp586A0522
1256	HSAP0406S00010705	0.0001628	0.0050868	-2.18873	NM_018917	PCDHGA4
1257	HSAP0406S00011519	0.0001259	0.0043641	-2.19135	BC010926	HIST1H4H
1258	HSAP0406S00017504	< 1e-07	< 1e-07	-2.19156	AK000975	N/A
1259	HSAP0406S00010715	0.0001903	0.0055475	-2.19292	NM_018925	PCDHGB5
1260	HSAP0406S00010728	0.0002136	0.0059311	-2.19396	BC004321	PCDHGC3
1261	HSAP0406S00010714	9.58e-05	0.0036354	-2.20722	NM_032088	PCDHGA8
1262	HSAP0406S00010711	0.0001779	0.0053837	-2.20814	NM_018920	PCDHGA7
1263	HSAP0406S00012622	2.08e-05	0.0013012	-2.21507	NM_014454	SESN1
1264	HSAP0406S00010702	0.0001329	0.0044926	-2.23741	NM_018915	PCDHGA2
1265	HSAP0406S00010719	0.0001136	0.0040957	-2.23891	NM_018913	PCDHGA10
1266	HSAP0406S00027620	2.24e-05	0.0013688	-2.24005	AK056324	N/A
1267	HSAP0406S00019736	3.19e-05	0.0017945	-2.26168	NM_148976	PSMA1
1268	HSAP0406S00014264	1.3e-06	0.0001669	-2.27413	NM_004444	EPHB4
1269	HSAP0406S00022240	1.6e-06	0.0001933	-2.29977	NM_014033	DKFZP586A0522
1270	HSAP0406S00010717	8.05e-05	0.003256	-2.31088	NM_018926	PCDHGB6
1271	HSAP0406S00017703	8.68e-05	0.0034025	-2.31577	NM_201446	EGFL7
1272	HSAP0406S00010707	0.0001062	0.0038858	-2.33208	NM_018918	PCDHGA5
1273	HSAP0406S00030092	3.16e-05	0.0017831	-2.33668	NM_152468	EVER2
1274	HSAP0406S00010727	4.38e-05	0.0022108	-2.40452	NM_018929	PCDHGC5
1275	HSAP0406S00023581	0.0005175	0.0096646	-2.40752	NM_004119	FLT3
1276	HSAP0406S00028279	9e-06	0.0007116	-2.40799	NM_002561	P2RX5
1277	HSAP0406S00036099	0.0001401	0.0046675	-2.42171	NM_004429	EFNB1
1278	HSAP0406S00001547	7.4e-06	0.0006169	-2.44557	BC035058	PRKACB
1279	HSAP0406S00029787	2.29e-05	0.0013855	-2.44691	NM_000442	PECAM1
1280	HSAP0406S00036590	4.74e-05	0.0023182	-2.48396	NM_001449	FHL1
1281	HSAP0406S00000266	0.000328	0.0076059	-2.51955	AF479408	N/A
1282	HSAP0406S00029914	1e-07	1.93e-05	-2.53865	AK098068	N/A
1283	HSAP0406S00012728	0.0001414	0.0046938	-2.5424	NM_005907	MAN1A1
1284	HSAP0406S00001548	3.8e-06	0.0003714	-2.54709	NM_182948	PRKACB
1285	HSAP0406S00009330	2.19e-05	0.0013472	-2.57781	AK022142	N/A
1286	HSAP0406S00031085	2.9e-06	0.0003044	-2.74428	AK098244	N/A
1287	HSAP0406S00009328	2.5e-06	0.000275	-2.79088	NM_207123	GAB1
1288	HSAP0406S00022257	2e-07	3.54e-05	-2.7955	NM_020467	LOC57228
1289	HSAP0406S00008919	1.6e-06	0.0001933	-2.81059	BC034001	ANTXR2
1290	HSAP0406S00002329	0.0003423	0.0078049	-2.83331	NM_000906	NPR1
1291	HSAP0406S00008593	7.1e-06	0.0006042	-2.87369	BC030803	FLJ23235
1292	HSAP0406S00013312	2.74e-05	0.0015924	-2.895	BC007539	FSCN1
1293	HSAP0406S00008592	8.2e-06	0.0006655	-2.89956	BC060512	N/A
1294	HSAP0406S00013313	9.6e-06	0.0007416	-3.00281	NM_003088	FSCN1
1295	HSAP0406S00003292	0.0003651	0.0080358	-3.02857	M81104	N/A
1296	HSAP0406S00023738	5.3e-05	0.0024941	-3.0844	BC004495	C13orf18
1297	HSAP0406S00023741	4.75e-05	0.0023182	-3.08807	AK125950	N/A
1298	HSAP0406S00023740	6.01e-05	0.002694	-3.11733	BC043488	C13orf18
1299	HSAP0406S00003289	0.000254	0.0066424	-3.15969	BX538076	DKFZp686I22213
1300	HSAP0406S00031721	0.0002327	0.0062495	-3.23229	AF326591	FELS
1301	HSAP0406S00031720	0.0003995	0.0084147	-3.2856	AK074054	FLJ00125
1302	HSAP0406S00030895	3.54e-05	0.0019353	-3.30472	NM_002579	PALM
1303	HSAP0406S00003290	0.0003715	0.0080854	-3.45257	AF202879	CD34
1304	HSAP0406S00011217	0.0002431	0.0064304	-3.52161	S66407	FLT4
1305	HSAP0406S00021615	1.6e-06	0.0001933	-3.67164	NM_001759	CCND2
1306	HSAP0406S00003291	0.0003492	0.0078649	-3.73765	AF538601	CD34
1307	HSAP0406S00008391	1.71e-05	0.0011353	-3.75275	AF274956	N/A
1308	HSAP0406S00035778	0.0003947	0.0083818	-3.80015	AB062057	TM4SF2
1309	HSAP0406S00035779	0.0002035	0.0057547	-3.82094	AB102665	TM4SF2
1310	HSAP0406S00008392	9e-06	0.0007116	-3.9174	NM_018659	C17
1311	HSAP0406S00022829	9e-07	0.0001247	-4.01061	NM_003877	SOCS2
1312	HSAP0406S00002317	0.0001225	0.0042936	-4.75814	BC019099	S100A16
